# Supplementary material for: Fluorescent nano-sized aggregates of halogen bonded complexes formed using perfluoropropyl iodides: a systematic comparison between two isomeric halogen bond acceptors, aniline and 4-methyl pyridine
Source: Royal Society of Chemistry journal article supplement (doi:10.1039/d3cp01225e), 2023-01-01
Supplement: d3cp01225e1.pdf [file d3cp01225e1.pdf]

Electronic Supplementary Information

**Fluorescent Nano-sized Aggregates of Halogen Bonded Complexes Formed with Perfluoropropyl Iodides: a Systematic Comparison between Two Isomeric Halogen Bond Acceptors, Aniline and 4-Methyl Pyridine**

Haiyan Fan,<sup>a</sup> Lazzat Nurtay<sup>a</sup>, Nurgul Daniyeva<sup>b</sup> and Enrico Benassi<sup>\*c</sup>

<sup>a</sup> Chemistry Department, School of Sciences and Humanities, Nazarbayev University, Astana, 010000, Kazakhstan

<sup>b</sup> Core Facility, Nazarbayev University, Astana 010000, Kazakhstan

<sup>c</sup> Faculty of Natural Sciences, Novosibirsk State University, Novosibirsk, 630090, Russian Federation

\*Corresponding author: Enrico Benassi (email: [ebenassi3@gmail.com](mailto:ebenassi3@gmail.com))

**A. Optimised geometries**

ALN\_ic3F7I\_1

|    |           |           |           |
|----|-----------|-----------|-----------|
| 6  | 1.206985  | 0.574183  | 0.323082  |
| 6  | -0.000606 | 1.272364  | 0.403772  |
| 6  | -1.207331 | 0.573303  | 0.317910  |
| 6  | -1.201767 | -0.809302 | 0.164537  |
| 6  | 0.001078  | -1.508937 | 0.090883  |
| 6  | 1.203086  | -0.808426 | 0.169689  |
| 1  | 2.145896  | 1.115226  | 0.372153  |
| 1  | -2.146837 | 1.113662  | 0.362958  |
| 1  | -2.144046 | -1.340553 | 0.100664  |
| 1  | 0.001729  | -2.584968 | -0.030109 |
| 1  | 2.146016  | -1.338990 | 0.109854  |
| 1  | 0.828304  | 3.070419  | 0.917448  |
| 1  | -0.833018 | 3.069814  | 0.913891  |
| 53 | 0.004144  | 3.663402  | -2.222291 |
| 7  | -0.001293 | 2.684519  | 0.484184  |
| 6  | 0.008300  | 4.440307  | -4.297022 |
| 6  | -1.285764 | 4.011313  | -5.029933 |
| 6  | 1.305808  | 4.012269  | -5.024383 |
| 9  | 0.007731  | 5.811161  | -4.267391 |
| 9  | 1.361811  | 4.526003  | -6.264732 |
| 9  | 1.395102  | 2.678725  | -5.123150 |
| 9  | 2.377711  | 4.462734  | -4.355869 |
| 9  | -1.336833 | 4.525008  | -6.270511 |
| 9  | -1.373651 | 2.677704  | -5.129080 |
| 9  | -2.360853 | 4.460987  | -4.366017 |

ALN\_ic3F7I\_2

|    |           |           |           |
|----|-----------|-----------|-----------|
| 6  | 1.210374  | 0.552952  | 0.256172  |
| 6  | 0.018866  | 1.270614  | 0.388616  |
| 6  | -1.203200 | 0.599909  | 0.293956  |
| 6  | -1.228540 | -0.774567 | 0.080958  |
| 6  | -0.041687 | -1.493929 | -0.044154 |
| 6  | 1.175577  | -0.821342 | 0.043393  |
| 1  | 2.160851  | 1.072729  | 0.311871  |
| 1  | -2.130571 | 1.156140  | 0.379259  |
| 1  | -2.182449 | -1.283841 | 0.010993  |
| 1  | -0.065108 | -2.563523 | -0.211214 |
| 1  | 2.106305  | -1.367281 | -0.056054 |
| 1  | 0.892404  | 3.026863  | 0.968300  |
| 1  | -0.768104 | 3.059506  | 0.991933  |
| 53 | 0.036009  | 3.797160  | -2.119241 |
| 7  | 0.048577  | 2.677602  | 0.531372  |
| 6  | 0.029875  | 4.561020  | -4.199316 |
| 6  | 1.293691  | 5.416272  | -4.458103 |

|   |           |          |           |
|---|-----------|----------|-----------|
| 6 | -1.295180 | 5.305890 | -4.490973 |
| 9 | 0.086053  | 3.503227 | -5.069355 |
| 9 | -1.350159 | 5.721982 | -5.767273 |
| 9 | -1.439457 | 6.378238 | -3.698998 |
| 9 | -2.337440 | 4.486333 | -4.291469 |
| 9 | 1.345459  | 5.836839 | -5.733063 |
| 9 | 1.326167  | 6.496137 | -3.663933 |
| 9 | 2.396569  | 4.688105 | -4.231367 |

ALN\_ic3F7I\_3

|    |           |           |           |
|----|-----------|-----------|-----------|
| 6  | 1.207805  | 1.116582  | 0.396676  |
| 6  | 0.002731  | 1.636937  | 0.888056  |
| 6  | -1.203703 | 1.119509  | 0.396925  |
| 6  | -1.199598 | 0.110695  | -0.559624 |
| 6  | 0.000054  | -0.404036 | -1.047320 |
| 6  | 1.201054  | 0.107782  | -0.559871 |
| 1  | 2.149449  | 1.515366  | 0.759593  |
| 1  | -2.144302 | 1.520576  | 0.760037  |
| 1  | -2.143794 | -0.272056 | -0.929917 |
| 1  | -0.000970 | -1.184630 | -1.797619 |
| 1  | 2.144241  | -0.277260 | -0.930360 |
| 1  | 0.841256  | 2.788856  | 2.354866  |
| 1  | -0.832692 | 2.790887  | 2.355040  |
| 7  | 0.004112  | 2.697726  | 1.798460  |
| 6  | 0.004470  | 3.413948  | -3.173454 |
| 6  | -1.299799 | 2.832667  | -3.788782 |
| 6  | 1.307202  | 2.829507  | -3.789047 |
| 9  | 1.401376  | 3.116715  | -5.094250 |
| 9  | 1.341021  | 1.498405  | -3.649733 |
| 9  | 2.374817  | 3.334498  | -3.159104 |
| 9  | -1.393541 | 3.120103  | -5.093966 |
| 9  | -1.336817 | 1.501651  | -3.649460 |
| 9  | -2.366059 | 3.340245  | -3.158623 |
| 9  | 0.004221  | 3.097495  | -1.856256 |
| 53 | 0.007099  | 5.599756  | -3.383797 |

ALN\_ic3F7I\_4

|    |           |           |           |
|----|-----------|-----------|-----------|
| 6  | 0.470882  | 0.728673  | 1.190945  |
| 6  | -0.923840 | 0.737756  | 1.031081  |
| 6  | -1.476214 | 0.124036  | -0.104371 |
| 6  | -0.655220 | -0.475832 | -1.049691 |
| 6  | 0.733512  | -0.476684 | -0.893480 |
| 6  | 1.284222  | 0.126626  | 0.240420  |
| 1  | 0.912309  | 1.206861  | 2.058545  |
| 1  | -2.551497 | 0.131269  | -0.245701 |
| 1  | -1.100949 | -0.940102 | -1.921622 |
| 1  | 1.369873  | -0.957932 | -1.625415 |
| 1  | 2.358938  | 0.134867  | 0.379715  |
| 1  | -1.350645 | 1.544848  | 2.865904  |
| 1  | -2.708015 | 1.123454  | 1.962786  |
| 7  | -1.736733 | 1.393672  | 1.946805  |
| 6  | 0.936967  | 4.398440  | -3.396964 |
| 6  | 0.098372  | 4.375517  | -4.701642 |
| 6  | 0.537712  | 5.534806  | -2.419230 |
| 9  | -0.731807 | 5.407514  | -2.012399 |
| 9  | 0.670920  | 6.737475  | -3.001986 |
| 9  | 1.336317  | 5.517924  | -1.343926 |
| 9  | -1.200299 | 4.169329  | -4.445903 |
| 9  | 0.213486  | 5.536676  | -5.366286 |
| 9  | 0.534887  | 3.402531  | -5.512102 |
| 9  | 2.232647  | 4.635107  | -3.766775 |
| 53 | 0.807212  | 2.452870  | -2.379849 |

ALN\_ic3F7I\_5

|   |           |           |           |
|---|-----------|-----------|-----------|
| 6 | 0.808541  | 1.229606  | -0.623168 |
| 6 | -0.561689 | 1.103153  | -0.418672 |
| 6 | -1.144716 | -0.153405 | -0.250738 |
| 6 | -0.356199 | -1.316404 | -0.298633 |

|    |           |           |           |
|----|-----------|-----------|-----------|
| 6  | 1.025319  | -1.180910 | -0.506413 |
| 6  | 1.593513  | 0.076024  | -0.665239 |
| 1  | 1.259076  | 2.206371  | -0.743456 |
| 1  | -1.189801 | 1.985350  | -0.377600 |
| 1  | -2.217109 | -0.240393 | -0.112534 |
| 1  | 1.648230  | -2.068018 | -0.541399 |
| 1  | 2.663466  | 0.156260  | -0.818341 |
| 1  | -1.837087 | -2.605413 | 0.274184  |
| 1  | -0.325895 | -3.317195 | 0.116938  |
| 7  | -0.937943 | -2.573117 | -0.182722 |
| 6  | -0.445771 | -0.274372 | 5.121942  |
| 6  | -0.598584 | -1.750526 | 5.572045  |
| 6  | 0.864032  | 0.395613  | 5.613138  |
| 9  | -1.480096 | 0.418495  | 5.687795  |
| 9  | 0.897635  | 1.676839  | 5.225411  |
| 9  | 1.944486  | -0.228542 | 5.125855  |
| 9  | 0.939064  | 0.375969  | 6.953502  |
| 9  | -1.773057 | -2.240492 | 5.150979  |
| 9  | 0.384135  | -2.517346 | 5.080207  |
| 9  | -0.576196 | -1.850167 | 6.910129  |
| 53 | -0.584538 | -0.138783 | 2.928075  |

ALN\_ic3F7I\_6

|    |           |           |           |
|----|-----------|-----------|-----------|
| 6  | -0.370331 | 1.349240  | -0.806020 |
| 6  | -1.354137 | 0.412618  | -0.505810 |
| 6  | -1.013408 | -0.902863 | -0.188822 |
| 6  | 0.332968  | -1.307624 | -0.181170 |
| 6  | 1.319910  | -0.357222 | -0.485979 |
| 6  | 0.967387  | 0.950304  | -0.792494 |
| 1  | -0.637285 | 2.371319  | -1.041849 |
| 1  | -2.398729 | 0.701227  | -0.505256 |
| 1  | -1.790784 | -1.629021 | 0.023556  |
| 1  | 2.363515  | -0.652269 | -0.479794 |
| 1  | 1.747225  | 1.668254  | -1.018487 |
| 1  | -0.005105 | -3.169162 | 0.595495  |
| 1  | 1.617269  | -2.784320 | 0.408026  |
| 7  | 0.675067  | -2.628410 | 0.082498  |
| 6  | -0.421288 | 0.019610  | 5.117060  |
| 6  | 1.067698  | -0.118264 | 5.528280  |
| 6  | -1.081701 | 1.338867  | 5.595294  |
| 9  | -1.094320 | -1.002805 | 5.727644  |
| 9  | -2.374301 | 1.358357  | 5.245050  |
| 9  | -0.477022 | 2.408813  | 5.063260  |
| 9  | -1.023106 | 1.446988  | 6.932269  |
| 9  | 1.548660  | -1.301815 | 5.121394  |
| 9  | 1.816333  | 0.854010  | 4.992214  |
| 9  | 1.204723  | -0.064750 | 6.862409  |
| 53 | -0.619228 | -0.177087 | 2.932516  |

ALN\_ic3F7I\_7

|   |           |           |           |
|---|-----------|-----------|-----------|
| 6 | 0.001900  | 1.316842  | -0.435391 |
| 6 | -1.196766 | 0.619757  | -0.292776 |
| 6 | -1.198217 | -0.739677 | -0.002143 |
| 6 | 0.009293  | -1.433693 | 0.155252  |
| 6 | 1.213072  | -0.731345 | 0.006475  |
| 6 | 1.204305  | 0.628053  | -0.284195 |
| 1 | -0.000970 | 2.376771  | -0.657120 |
| 1 | -2.142136 | 1.138647  | -0.404184 |
| 1 | -2.137636 | -1.271346 | 0.106897  |
| 1 | 2.155340  | -1.256512 | 0.122239  |
| 1 | 2.146838  | 1.153467  | -0.388857 |
| 1 | -0.821879 | -3.163423 | 0.847275  |
| 1 | 0.847431  | -3.157655 | 0.853241  |
| 7 | 0.013152  | -2.808475 | 0.404672  |
| 6 | -0.009933 | 0.116330  | 4.037262  |
| 6 | -1.310437 | -0.725738 | 4.168292  |
| 6 | 1.295395  | -0.716727 | 4.177595  |
| 9 | 2.360879  | 0.066482  | 3.984155  |
| 9 | 1.334391  | -1.694338 | 3.257907  |

|    |           |           |          |
|----|-----------|-----------|----------|
| 9  | 1.386799  | -1.282756 | 5.387376 |
| 9  | -2.379903 | 0.050089  | 3.967233 |
| 9  | -1.336105 | -1.703570 | 3.248370 |
| 9  | -1.406557 | -1.292418 | 5.377402 |
| 53 | -0.020830 | 1.721669  | 5.534775 |
| 9  | -0.007412 | 0.665266  | 2.799535 |

ALN\_ic3F7I\_8

|    |           |           |           |
|----|-----------|-----------|-----------|
| 6  | 0.389709  | 1.249167  | -0.672769 |
| 6  | -0.944720 | 0.953368  | -0.398108 |
| 6  | -1.321376 | -0.322072 | 0.006126  |
| 6  | -0.362489 | -1.334215 | 0.147649  |
| 6  | 0.977464  | -1.035350 | -0.134409 |
| 6  | 1.344617  | 0.243197  | -0.538787 |
| 1  | 0.679721  | 2.245376  | -0.982631 |
| 1  | -1.701424 | 1.723647  | -0.494605 |
| 1  | -2.362783 | -0.539916 | 0.217978  |
| 1  | 1.729636  | -1.810419 | -0.034669 |
| 1  | 2.387541  | 0.454428  | -0.746069 |
| 1  | -1.605883 | -2.687740 | 1.031875  |
| 1  | -0.013484 | -3.177246 | 0.948056  |
| 7  | -0.741387 | -2.628845 | 0.513598  |
| 6  | 0.397936  | 0.257290  | 3.803792  |
| 6  | 1.055105  | 1.242678  | 4.812660  |
| 6  | -1.076931 | -0.097267 | 4.146052  |
| 9  | -1.563989 | -0.978820 | 3.262794  |
| 9  | -1.843487 | 0.999490  | 4.090905  |
| 9  | -1.178837 | -0.624177 | 5.372557  |
| 9  | 2.288533  | 1.556582  | 4.401092  |
| 9  | 0.343845  | 2.377642  | 4.882619  |
| 9  | 1.130993  | 0.718844  | 6.041125  |
| 53 | 1.596023  | -1.579972 | 3.697452  |
| 9  | 0.395676  | 0.871219  | 2.597004  |

ALN\_ic3F7I\_trm1

|    |           |           |           |
|----|-----------|-----------|-----------|
| 6  | 3.810454  | 1.923596  | -0.038953 |
| 6  | 3.596761  | 1.106449  | -1.145108 |
| 6  | 3.368736  | -0.259800 | -0.983185 |
| 6  | 3.354245  | -0.821673 | 0.299824  |
| 6  | 3.577403  | -0.000977 | 1.409763  |
| 6  | 3.801506  | 1.359677  | 1.236653  |
| 1  | 3.982266  | 2.984581  | -0.167361 |
| 1  | 3.601279  | 1.527739  | -2.143179 |
| 1  | 3.223052  | -0.895043 | -1.850068 |
| 1  | 3.574905  | -0.431711 | 2.404857  |
| 1  | 3.966802  | 1.984396  | 2.106234  |
| 1  | 2.665928  | -2.654622 | -0.283859 |
| 1  | 2.804258  | -2.475769 | 1.363190  |
| 7  | 3.184129  | -2.209661 | 0.463453  |
| 6  | -2.046768 | 0.091575  | -0.332499 |
| 6  | -2.509809 | -1.274188 | 0.240821  |
| 6  | -2.531929 | 1.313943  | 0.491849  |
| 9  | -2.600505 | 0.206418  | -1.575464 |
| 9  | -2.128738 | 2.449041  | -0.092172 |
| 9  | -2.052112 | 1.280031  | 1.741826  |
| 9  | -3.871375 | 1.343077  | 0.557107  |
| 9  | -2.091314 | -2.270145 | -0.552306 |
| 9  | -2.023883 | -1.477537 | 1.472944  |
| 9  | -3.847448 | -1.338646 | 0.301598  |
| 53 | 0.146123  | 0.124929  | -0.502389 |
| 6  | 7.918943  | -4.151620 | 0.239001  |
| 6  | 8.737575  | -3.712805 | 1.478381  |
| 6  | 8.580684  | -3.774901 | -1.109714 |
| 9  | 7.850200  | -5.519249 | 0.275977  |
| 9  | 7.837832  | -4.230416 | -2.128757 |
| 9  | 9.800085  | -4.325953 | -1.222804 |
| 9  | 8.710569  | -2.447199 | -1.237078 |
| 9  | 8.124923  | -4.117560 | 2.600229  |
| 9  | 9.963586  | -4.260681 | 1.469240  |

|    |          |           |          |
|----|----------|-----------|----------|
| 9  | 8.877379 | -2.380812 | 1.525984 |
| 53 | 5.875126 | -3.313401 | 0.342464 |

ALN\_ic3F7I\_trm2

|    |           |           |           |
|----|-----------|-----------|-----------|
| 6  | 3.874416  | 1.845464  | 0.085431  |
| 6  | 3.661613  | 1.071609  | -1.051614 |
| 6  | 3.396661  | -0.293073 | -0.940479 |
| 6  | 3.343726  | -0.897148 | 0.322191  |
| 6  | 3.566420  | -0.120197 | 1.463268  |
| 6  | 3.827414  | 1.239384  | 1.340706  |
| 1  | 4.074698  | 2.905491  | -0.003630 |
| 1  | 3.695504  | 1.525929  | -2.034518 |
| 1  | 3.251711  | -0.894908 | -1.831002 |
| 1  | 3.534473  | -0.583949 | 2.442892  |
| 1  | 3.991680  | 1.830107  | 2.233920  |
| 1  | 2.619071  | -2.690473 | -0.335722 |
| 1  | 2.729843  | -2.570348 | 1.318401  |
| 7  | 3.134507  | -2.284862 | 0.435541  |
| 6  | -2.019638 | 0.175162  | -0.379461 |
| 6  | -2.524251 | -1.188177 | 0.163768  |
| 6  | -2.492084 | 1.395651  | 0.454999  |
| 9  | -2.547346 | 0.321734  | -1.630380 |
| 9  | -2.052276 | 2.529934  | -0.103634 |
| 9  | -2.036567 | 1.331529  | 1.712843  |
| 9  | -3.831500 | 1.454706  | 0.496165  |
| 9  | -2.113966 | -2.181245 | -0.637275 |
| 9  | -2.065961 | -1.421583 | 1.401118  |
| 9  | -3.863899 | -1.222664 | 0.199217  |
| 53 | 0.176223  | 0.160383  | -0.508671 |
| 6  | 7.851470  | -4.266170 | 0.232499  |
| 6  | 7.985422  | -5.261751 | -0.946260 |
| 6  | 8.261181  | -4.862988 | 1.601640  |
| 9  | 8.716651  | -3.235261 | -0.022525 |
| 9  | 8.164611  | -3.928047 | 2.557616  |
| 9  | 9.534040  | -5.290360 | 1.583476  |
| 9  | 7.479571  | -5.898666 | 1.938000  |
| 9  | 7.660245  | -4.656726 | -2.097645 |
| 9  | 9.247437  | -5.704479 | -1.066532 |
| 9  | 7.185604  | -6.324805 | -0.782775 |
| 53 | 5.787666  | -3.476945 | 0.332571  |

ALN\_nc3F7I\_trm1

|    |           |           |           |
|----|-----------|-----------|-----------|
| 6  | 4.659625  | -0.912658 | 1.235238  |
| 6  | 4.160643  | -1.340247 | 0.000180  |
| 6  | 4.709799  | -0.822408 | -1.177760 |
| 6  | 5.743146  | 0.105157  | -1.117403 |
| 6  | 6.241217  | 0.534761  | 0.113586  |
| 6  | 5.693188  | 0.015189  | 1.287281  |
| 1  | 4.226495  | -1.297100 | 2.152113  |
| 1  | 4.315273  | -1.136321 | -2.137878 |
| 1  | 6.155291  | 0.502545  | -2.037226 |
| 1  | 7.048319  | 1.255309  | 0.157329  |
| 1  | 6.066177  | 0.342148  | 2.250515  |
| 1  | 2.958563  | -2.811961 | 0.756010  |
| 1  | 3.001016  | -2.758430 | -0.908642 |
| 53 | 0.563861  | -0.593307 | -0.096923 |
| 7  | 3.061936  | -2.217524 | -0.055959 |
| 6  | -1.255690 | 0.648545  | -0.153151 |
| 6  | -2.540169 | -0.198468 | 0.055753  |
| 6  | -3.886647 | 0.591976  | 0.035208  |
| 9  | -1.193789 | 1.589639  | 0.813064  |
| 9  | -1.338869 | 1.278986  | -1.344189 |
| 9  | -2.463060 | -0.821942 | 1.253296  |
| 9  | -2.611925 | -1.132383 | -0.919764 |
| 9  | -3.919917 | 1.507825  | 1.008016  |
| 9  | -4.066269 | 1.202416  | -1.140264 |
| 9  | -4.897528 | -0.266724 | 0.226107  |
| 6  | 1.676666  | 3.806343  | 0.178672  |
| 6  | 1.892208  | 5.325507  | -0.066999 |

|    |           |          |           |
|----|-----------|----------|-----------|
| 6  | 0.595369  | 6.196566 | -0.064689 |
| 9  | 1.079086  | 3.635136 | 1.373829  |
| 9  | 0.855611  | 3.321372 | -0.773696 |
| 9  | 2.703969  | 5.813770 | 0.896315  |
| 9  | 2.485225  | 5.494820 | -1.269082 |
| 9  | -0.031173 | 6.118770 | 1.113158  |
| 9  | -0.244119 | 5.807909 | -1.028772 |
| 9  | 0.932440  | 7.474277 | -0.283575 |
| 53 | 3.565370  | 2.695697 | 0.142018  |

ALN\_nC3F7I\_trm2

|    |           |           |           |
|----|-----------|-----------|-----------|
| 6  | 4.068602  | 1.619878  | 0.337628  |
| 6  | 3.971677  | 0.304242  | -0.127318 |
| 6  | 4.042974  | 0.057757  | -1.504303 |
| 6  | 4.215642  | 1.115180  | -2.396182 |
| 6  | 4.319435  | 2.423093  | -1.931407 |
| 6  | 4.242713  | 2.666256  | -0.560261 |
| 1  | 4.007164  | 1.818433  | 1.401894  |
| 1  | 3.945602  | -0.957137 | -1.874161 |
| 1  | 4.273097  | 0.908054  | -3.458059 |
| 1  | 4.458208  | 3.241675  | -2.625994 |
| 1  | 4.322362  | 3.679322  | -0.184441 |
| 1  | 4.073449  | -0.581519 | 1.709686  |
| 1  | 4.049293  | -1.656677 | 0.440677  |
| 53 | 0.782797  | -0.886864 | 0.929436  |
| 7  | 3.736652  | -0.752500 | 0.770875  |
| 6  | -1.414225 | -0.993319 | 1.043667  |
| 6  | -2.091333 | 0.133144  | 0.216254  |
| 6  | -3.652653 | 0.147021  | 0.231898  |
| 9  | -1.836658 | -2.190612 | 0.580432  |
| 9  | -1.808831 | -0.887456 | 2.331919  |
| 9  | -1.707069 | 0.016327  | -1.074743 |
| 9  | -1.677810 | 1.330127  | 0.689908  |
| 9  | -4.147084 | -0.989305 | -0.269463 |
| 9  | -4.118081 | 0.309992  | 1.474421  |
| 9  | -4.086102 | 1.166907  | -0.520758 |
| 6  | 9.395634  | -0.765633 | -0.532032 |
| 6  | 9.789315  | -0.469034 | 0.942409  |
| 6  | 11.265200 | -0.803981 | 1.329162  |
| 9  | 10.194920 | -0.056813 | -1.353235 |
| 9  | 9.593083  | -2.074916 | -0.785985 |
| 9  | 9.598412  | 0.845153  | 1.188742  |
| 9  | 8.988553  | -1.189365 | 1.759929  |
| 9  | 12.124501 | -0.094934 | 0.591565  |
| 9  | 11.519204 | -2.105121 | 1.160312  |
| 9  | 11.454641 | -0.496591 | 2.618190  |
| 53 | 7.296028  | -0.249390 | -0.920449 |

ANL2\_01

|   |           |           |           |
|---|-----------|-----------|-----------|
| 6 | 1.340814  | 0.550189  | -0.067349 |
| 6 | 0.423766  | 1.529836  | -0.464483 |
| 6 | -0.930327 | 1.192155  | -0.569558 |
| 6 | -1.354513 | -0.100255 | -0.279007 |
| 6 | -0.441635 | -1.074863 | 0.120140  |
| 6 | 0.907374  | -0.739411 | 0.222012  |
| 1 | 2.390153  | 0.806701  | 0.033476  |
| 1 | -1.651380 | 1.950685  | -0.854694 |
| 1 | -2.407989 | -0.342442 | -0.356707 |
| 1 | -0.776473 | -2.078433 | 0.351105  |
| 1 | 1.629966  | -1.484113 | 0.535019  |
| 7 | 0.840417  | 2.861341  | -0.653837 |
| 1 | 1.814347  | 2.959792  | -0.907312 |
| 1 | 0.250531  | 3.396025  | -1.277590 |
| 1 | 0.247608  | 3.517574  | 1.374266  |
| 7 | -0.169044 | 3.902190  | 2.214932  |
| 6 | -0.306197 | 3.048090  | 3.308064  |
| 6 | -0.387597 | 1.657787  | 3.131068  |
| 6 | -0.422587 | 3.564279  | 4.608395  |
| 6 | -0.576190 | 0.819371  | 4.223675  |

|   |           |           |          |
|---|-----------|-----------|----------|
| 1 | -0.306786 | 1.238954  | 2.136822 |
| 6 | -0.611819 | 2.715980  | 5.694006 |
| 1 | -0.367725 | 4.637557  | 4.762163 |
| 6 | -0.690308 | 1.335606  | 5.514319 |
| 1 | -0.633852 | -0.251152 | 4.059783 |
| 1 | -0.697539 | 3.139458  | 6.688771 |
| 1 | -0.836873 | 0.677001  | 6.361707 |
| 1 | 0.180025  | 4.823654  | 2.431669 |

ANL2\_02

|   |           |           |           |
|---|-----------|-----------|-----------|
| 6 | 1.150900  | 0.430186  | 0.332495  |
| 6 | 0.507658  | 1.468236  | -0.350947 |
| 6 | -0.793709 | 1.267453  | -0.825044 |
| 6 | -1.436135 | 0.051873  | -0.614499 |
| 6 | -0.796814 | -0.980593 | 0.069467  |
| 6 | 0.500335  | -0.781727 | 0.539134  |
| 1 | 2.153329  | 0.582097  | 0.718677  |
| 1 | -1.308481 | 2.074021  | -1.335971 |
| 1 | -2.447224 | -0.083677 | -0.980324 |
| 1 | -1.302353 | -1.923534 | 0.236518  |
| 1 | 1.010468  | -1.572667 | 1.076602  |
| 7 | 1.119380  | 2.730914  | -0.468404 |
| 1 | 2.129783  | 2.707590  | -0.436397 |
| 1 | 0.796926  | 3.276537  | -1.256592 |
| 1 | 0.067843  | 3.594885  | 1.276028  |
| 7 | -0.517080 | 4.082593  | 1.945546  |
| 6 | -1.057106 | 3.331361  | 2.988263  |
| 6 | -1.254380 | 1.947965  | 2.853385  |
| 6 | -1.468484 | 3.952288  | 4.178252  |
| 6 | -1.841343 | 1.217644  | 3.880227  |
| 1 | -0.950566 | 1.450105  | 1.942171  |
| 6 | -2.055304 | 3.211714  | 5.198626  |
| 1 | -1.328577 | 5.022347  | 4.296493  |
| 6 | -2.247845 | 1.837658  | 5.061592  |
| 1 | -1.980751 | 0.149858  | 3.751381  |
| 1 | -2.363371 | 3.714732  | 6.108739  |
| 1 | -2.704375 | 1.262988  | 5.858238  |
| 1 | -0.133043 | 4.975935  | 2.214570  |

ANL2\_03

|   |           |           |           |
|---|-----------|-----------|-----------|
| 6 | 1.227845  | 0.913248  | -0.099930 |
| 6 | 0.006287  | 1.597702  | -0.057616 |
| 6 | -1.071622 | 1.022629  | 0.625874  |
| 6 | -0.922532 | -0.206444 | 1.258919  |
| 6 | 0.292743  | -0.887922 | 1.217290  |
| 6 | 1.364442  | -0.319777 | 0.529463  |
| 1 | 2.071429  | 1.354640  | -0.621003 |
| 1 | -2.016182 | 1.550751  | 0.681578  |
| 1 | -1.766300 | -0.630486 | 1.790978  |
| 1 | 0.402847  | -1.846439 | 1.709511  |
| 1 | 2.316262  | -0.836844 | 0.483971  |
| 7 | -0.105047 | 2.882181  | -0.618826 |
| 1 | 0.473566  | 3.035959  | -1.433231 |
| 1 | -1.057025 | 3.179782  | -0.782912 |
| 1 | 0.495607  | 3.851267  | 1.530356  |
| 7 | 0.188893  | 3.686737  | 2.482136  |
| 6 | -1.198142 | 3.603397  | 2.598067  |
| 6 | -2.025095 | 4.381157  | 1.772599  |
| 6 | -1.800192 | 2.767175  | 3.549393  |
| 6 | -3.409537 | 4.297991  | 1.878627  |
| 1 | -1.570524 | 5.052548  | 1.052495  |
| 6 | -3.184283 | 2.694996  | 3.652757  |
| 1 | -1.174226 | 2.157029  | 4.191885  |
| 6 | -4.003457 | 3.451568  | 2.814502  |
| 1 | -4.029520 | 4.905217  | 1.228037  |
| 1 | -3.627139 | 2.034813  | 4.390311  |
| 1 | -5.081700 | 3.389141  | 2.894850  |
| 1 | 0.678710  | 2.896294  | 2.878004  |

## ANL2\_04

|   |           |           |           |
|---|-----------|-----------|-----------|
| 6 | 1.083488  | 0.956895  | 0.022817  |
| 6 | 0.039956  | 1.878292  | -0.133840 |
| 6 | -1.233852 | 1.550367  | 0.345358  |
| 6 | -1.451234 | 0.329564  | 0.974629  |
| 6 | -0.413263 | -0.587618 | 1.130931  |
| 6 | 0.853880  | -0.265281 | 0.646285  |
| 1 | 2.076237  | 1.205325  | -0.338720 |
| 1 | -2.044918 | 2.262180  | 0.246849  |
| 1 | -2.442471 | 0.098364  | 1.347238  |
| 1 | -0.588483 | -1.538449 | 1.619172  |
| 1 | 1.672468  | -0.967567 | 0.756278  |
| 7 | 0.292824  | 3.146967  | -0.684982 |
| 1 | 1.021288  | 3.162611  | -1.385546 |
| 1 | -0.535197 | 3.630420  | -1.004993 |
| 1 | 0.703263  | 4.014144  | 1.550737  |
| 7 | 0.211082  | 3.934859  | 2.433065  |
| 6 | -1.162380 | 4.140404  | 2.308145  |
| 6 | -1.658053 | 5.055013  | 1.365829  |
| 6 | -2.077189 | 3.464497  | 3.128526  |
| 6 | -3.027285 | 5.260001  | 1.231599  |
| 1 | -0.958797 | 5.604464  | 0.745269  |
| 6 | -3.443370 | 3.680114  | 2.991911  |
| 1 | -1.709412 | 2.751568  | 3.858854  |
| 6 | -3.933717 | 4.572139  | 2.037990  |
| 1 | -3.388515 | 5.968682  | 0.494270  |
| 1 | -4.132017 | 3.139567  | 3.631852  |
| 1 | -4.999251 | 4.734041  | 1.931289  |
| 1 | 0.452782  | 3.068624  | 2.894206  |

## ANL2\_05

|   |           |           |           |
|---|-----------|-----------|-----------|
| 6 | 0.988868  | 0.973451  | 0.069447  |
| 6 | 0.208153  | 2.102586  | -0.209852 |
| 6 | -1.155650 | 2.080729  | 0.105295  |
| 6 | -1.719017 | 0.954461  | 0.694984  |
| 6 | -0.942678 | -0.169324 | 0.973266  |
| 6 | 0.414086  | -0.151526 | 0.651854  |
| 1 | 2.048678  | 0.983795  | -0.164374 |
| 1 | -1.766271 | 2.954629  | -0.088738 |
| 1 | -2.774824 | 0.960804  | 0.940087  |
| 1 | -1.386944 | -1.045234 | 1.429961  |
| 1 | 1.032727  | -1.017587 | 0.858281  |
| 7 | 0.807082  | 3.269211  | -0.717313 |
| 1 | 1.600354  | 3.104872  | -1.321804 |
| 1 | 0.155526  | 3.919591  | -1.134725 |
| 1 | 1.126203  | 4.070753  | 1.557317  |
| 7 | 0.524741  | 4.123860  | 2.371231  |
| 6 | -0.740773 | 4.630605  | 2.078077  |
| 6 | -0.897657 | 5.612325  | 1.087234  |
| 6 | -1.878041 | 4.196329  | 2.774337  |
| 6 | -2.158069 | 6.117366  | 0.785353  |
| 1 | -0.021736 | 5.976377  | 0.561706  |
| 6 | -3.132808 | 4.710982  | 2.470536  |
| 1 | -1.773208 | 3.435184  | 3.540218  |
| 6 | -3.288234 | 5.669247  | 1.468694  |
| 1 | -2.256679 | 6.872745  | 0.013312  |
| 1 | -3.998833 | 4.353646  | 3.016668  |
| 1 | -4.268272 | 6.064538  | 1.231561  |
| 1 | 0.505990  | 3.235856  | 2.853444  |

## ANL2\_06

|   |           |           |           |
|---|-----------|-----------|-----------|
| 6 | 1.027726  | 0.929635  | 0.219384  |
| 6 | 0.537151  | 2.181491  | -0.173889 |
| 6 | -0.825513 | 2.458706  | -0.012472 |
| 6 | -1.672705 | 1.503899  | 0.539072  |
| 6 | -1.185144 | 0.258130  | 0.930714  |
| 6 | 0.170468  | -0.021894 | 0.762385  |
| 1 | 2.084093  | 0.708255  | 0.105119  |



|   |           |           |           |
|---|-----------|-----------|-----------|
| 1 | -1.213693 | 3.429981  | -0.295580 |
| 1 | -2.722819 | 1.741291  | 0.664565  |
| 1 | -1.849773 | -0.483253 | 1.357071  |
| 1 | 0.566818  | -0.986577 | 1.058496  |
| 7 | 1.418911  | 3.172316  | -0.640795 |
| 1 | 2.217722  | 2.817760  | -1.148620 |
| 1 | 0.966782  | 3.922948  | -1.144663 |
| 1 | 1.662717  | 3.998977  | 1.634310  |
| 7 | 1.004883  | 4.215183  | 2.374270  |
| 6 | -0.087023 | 4.959161  | 1.928753  |
| 6 | 0.071521  | 5.902979  | 0.901997  |
| 6 | -1.356539 | 4.804966  | 2.504347  |
| 6 | -1.014888 | 6.643815  | 0.448440  |
| 1 | 1.054449  | 6.051147  | 0.468579  |
| 6 | -2.435226 | 5.553924  | 2.049267  |
| 1 | -1.495544 | 4.076587  | 3.296212  |
| 6 | -2.279091 | 6.473997  | 1.012347  |
| 1 | -0.870416 | 7.364972  | -0.348698 |
| 1 | -3.409256 | 5.411252  | 2.504085  |
| 1 | -3.123032 | 7.052455  | 0.657226  |
| 1 | 0.748373  | 3.374819  | 2.873693  |

ANL2\_07

|   |           |           |           |
|---|-----------|-----------|-----------|
| 6 | 1.039823  | 0.771348  | 0.281378  |
| 6 | 0.799462  | 2.085719  | -0.139485 |
| 6 | -0.474991 | 2.635445  | 0.043069  |
| 6 | -1.480815 | 1.885131  | 0.642184  |
| 6 | -1.242232 | 0.577283  | 1.061293  |
| 6 | 0.024563  | 0.026048  | 0.872074  |
| 1 | 2.026810  | 0.339128  | 0.150922  |
| 1 | -0.668275 | 3.657312  | -0.261298 |
| 1 | -2.458158 | 2.332065  | 0.783233  |
| 1 | -2.029945 | -0.003997 | 1.524738  |
| 1 | 0.227525  | -0.990673 | 1.189048  |
| 7 | 1.848698  | 2.866536  | -0.655886 |
| 1 | 2.545884  | 2.345553  | -1.169895 |
| 1 | 1.542461  | 3.679506  | -1.172657 |
| 1 | 2.315965  | 3.685704  | 1.586780  |
| 7 | 1.735515  | 4.048823  | 2.333944  |
| 6 | 0.802994  | 4.985471  | 1.889702  |
| 6 | 1.119060  | 5.851299  | 0.831118  |
| 6 | -0.455269 | 5.104675  | 2.497417  |
| 6 | 0.191071  | 6.783556  | 0.378823  |
| 1 | 2.099380  | 5.787503  | 0.371932  |
| 6 | -1.374109 | 6.043293  | 2.043181  |
| 1 | -0.715512 | 4.439817  | 3.314207  |
| 6 | -1.065443 | 6.886093  | 0.975225  |
| 1 | 0.455072  | 7.440103  | -0.443138 |
| 1 | -2.344026 | 6.111231  | 2.523385  |
| 1 | -1.785802 | 7.613118  | 0.620995  |
| 1 | 1.329666  | 3.290392  | 2.864512  |

ANL2\_08

|   |           |           |           |
|---|-----------|-----------|-----------|
| 6 | -0.115139 | 1.330612  | 0.309451  |
| 6 | -0.282016 | 0.012187  | 0.749515  |
| 6 | 0.573401  | -0.988169 | 0.301017  |
| 6 | 1.600648  | -0.699677 | -0.595961 |
| 6 | 1.762225  | 0.611782  | -1.041387 |
| 6 | 0.916969  | 1.621156  | -0.592111 |
| 1 | -1.064939 | -0.221959 | 1.461146  |
| 1 | 0.433617  | -2.000982 | 0.660895  |
| 1 | 2.262418  | -1.483049 | -0.944600 |
| 1 | 2.553841  | 0.854174  | -1.741372 |
| 1 | 1.058898  | 2.641726  | -0.933095 |
| 7 | -0.912688 | 2.365337  | 0.829543  |
| 1 | -1.068895 | 3.135081  | 0.193313  |
| 1 | -1.778789 | 2.050039  | 1.244523  |
| 6 | -1.152171 | 1.321868  | 4.070874  |
| 6 | 0.184817  | 0.977240  | 3.818184  |

|   |           |           |          |
|---|-----------|-----------|----------|
| 6 | -2.046244 | 0.375126  | 4.559908 |
| 1 | -1.479394 | 2.338698  | 3.883973 |
| 6 | 0.601958  | -0.331835 | 4.099375 |
| 6 | -1.630455 | -0.930187 | 4.821276 |
| 1 | -3.075767 | 0.662232  | 4.744355 |
| 6 | -0.296629 | -1.269737 | 4.593829 |
| 1 | 1.631326  | -0.614234 | 3.905571 |
| 1 | -2.328872 | -1.665068 | 5.202228 |
| 1 | 0.047085  | -2.278219 | 4.795752 |
| 7 | 1.074298  | 1.929443  | 3.321811 |
| 1 | 1.897612  | 1.531921  | 2.891039 |
| 1 | 0.632886  | 2.591903  | 2.694648 |

ANL2\_09

|   |           |           |           |
|---|-----------|-----------|-----------|
| 6 | 0.158325  | 1.308201  | 0.311534  |
| 6 | -0.316459 | 0.071265  | 0.763499  |
| 6 | 0.242636  | -1.109059 | 0.286095  |
| 6 | 1.273511  | -1.082236 | -0.651742 |
| 6 | 1.741212  | 0.149352  | -1.108849 |
| 6 | 1.194276  | 1.335818  | -0.631120 |
| 1 | -1.104653 | 0.036818  | 1.506310  |
| 1 | -0.132484 | -2.056484 | 0.655575  |
| 1 | 1.703636  | -2.004485 | -1.022702 |
| 1 | 2.540330  | 0.189452  | -1.840417 |
| 1 | 1.574049  | 2.290149  | -0.981838 |
| 7 | -0.333298 | 2.506871  | 0.858017  |
| 1 | -0.315623 | 3.295031  | 0.225447  |
| 1 | -1.233781 | 2.416643  | 1.308235  |
| 6 | -0.703834 | 1.538874  | 4.110190  |
| 6 | 0.494132  | 0.872583  | 3.808387  |
| 6 | -1.786876 | 0.842869  | 4.636909  |
| 1 | -0.773486 | 2.606209  | 3.931599  |
| 6 | 0.581462  | -0.500622 | 4.079285  |
| 6 | -1.700680 | -0.526283 | 4.887991  |
| 1 | -2.704319 | 1.377009  | 4.859076  |
| 6 | -0.503518 | -1.186977 | 4.611607  |
| 1 | 1.499564  | -1.030135 | 3.847743  |
| 1 | -2.545564 | -1.065451 | 5.298398  |
| 1 | -0.415190 | -2.250386 | 4.804755  |
| 7 | 1.573711  | 1.575196  | 3.274280  |
| 1 | 2.255176  | 0.986764  | 2.815144  |
| 1 | 1.287931  | 2.329151  | 2.660296  |

ANL2\_10

|   |           |           |           |
|---|-----------|-----------|-----------|
| 6 | 0.158328  | 1.308201  | 0.311535  |
| 6 | -0.316457 | 0.071266  | 0.763500  |
| 6 | 0.242635  | -1.109058 | 0.286096  |
| 6 | 1.273509  | -1.082238 | -0.651743 |
| 6 | 1.741210  | 0.149350  | -1.108851 |
| 6 | 1.194276  | 1.335817  | -0.631121 |
| 1 | -1.104650 | 0.036821  | 1.506313  |
| 1 | -0.132485 | -2.056483 | 0.655577  |
| 1 | 1.703632  | -2.004487 | -1.022704 |
| 1 | 2.540327  | 0.189449  | -1.840420 |
| 1 | 1.574050  | 2.290148  | -0.981841 |
| 7 | -0.333293 | 2.506873  | 0.858018  |
| 1 | -0.315617 | 3.295032  | 0.225448  |
| 1 | -1.233776 | 2.416646  | 1.308236  |
| 6 | -0.703836 | 1.538873  | 4.110190  |
| 6 | 0.494132  | 0.872584  | 3.808390  |
| 6 | -1.786879 | 0.842866  | 4.636905  |
| 1 | -0.773490 | 2.606209  | 3.931600  |
| 6 | 0.581463  | -0.500620 | 4.079288  |
| 6 | -1.700682 | -0.526286 | 4.887986  |
| 1 | -2.704324 | 1.377004  | 4.859069  |
| 6 | -0.503518 | -1.186977 | 4.611606  |
| 1 | 1.499567  | -1.030131 | 3.847749  |
| 1 | -2.545566 | -1.065456 | 5.298389  |
| 1 | -0.415188 | -2.250386 | 4.804753  |

|   |          |          |          |
|---|----------|----------|----------|
| 7 | 1.573711 | 1.575200 | 3.274287 |
| 1 | 2.255179 | 0.986769 | 2.815153 |
| 1 | 1.287929 | 2.329152 | 2.660299 |

ANL2\_11

|   |           |           |           |
|---|-----------|-----------|-----------|
| 6 | 0.323918  | 1.596532  | -0.010860 |
| 6 | -1.065550 | 1.665428  | 0.140900  |
| 6 | -1.857750 | 0.559055  | -0.147245 |
| 6 | -1.282243 | -0.630316 | -0.590999 |
| 6 | 0.101234  | -0.697851 | -0.745774 |
| 6 | 0.901425  | 0.403176  | -0.459222 |
| 1 | -1.521021 | 2.580676  | 0.504142  |
| 1 | -2.931614 | 0.627370  | -0.017464 |
| 1 | -1.901401 | -1.491419 | -0.809539 |
| 1 | 0.565539  | -1.617105 | -1.083263 |
| 1 | 1.979351  | 0.333353  | -0.558156 |
| 7 | 1.138197  | 2.676098  | 0.381364  |
| 1 | 2.033330  | 2.712676  | -0.088020 |
| 1 | 0.678436  | 3.576153  | 0.349698  |
| 6 | 0.179752  | -0.241252 | 3.183565  |
| 6 | 1.166907  | 0.477744  | 3.876000  |
| 6 | -0.575670 | -1.207599 | 3.837637  |
| 1 | 0.010475  | -0.043094 | 2.133539  |
| 6 | 1.370394  | 0.193923  | 5.235741  |
| 6 | -0.371548 | -1.486196 | 5.188932  |
| 1 | -1.333172 | -1.747552 | 3.280103  |
| 6 | 0.609156  | -0.775549 | 5.879643  |
| 1 | 2.133773  | 0.736694  | 5.784589  |
| 1 | -0.963698 | -2.240208 | 5.693050  |
| 1 | 0.784870  | -0.975320 | 6.931049  |
| 7 | 1.965556  | 1.412257  | 3.218670  |
| 1 | 2.421598  | 2.083817  | 3.817796  |
| 1 | 1.588857  | 1.835732  | 2.377827  |

ANL2\_12

|   |           |           |           |
|---|-----------|-----------|-----------|
| 6 | 0.619709  | 1.512347  | 0.045730  |
| 6 | -0.708809 | 1.907084  | 0.239698  |
| 6 | -1.750484 | 1.041346  | -0.076650 |
| 6 | -1.488235 | -0.227338 | -0.590848 |
| 6 | -0.165247 | -0.619152 | -0.787596 |
| 6 | 0.882855  | 0.239558  | -0.473308 |
| 1 | -0.922487 | 2.885289  | 0.657472  |
| 1 | -2.773381 | 1.360377  | 0.086430  |
| 1 | -2.301392 | -0.900824 | -0.831277 |
| 1 | 0.056446  | -1.604699 | -1.180094 |
| 1 | 1.909826  | -0.083508 | -0.605776 |
| 7 | 1.677981  | 2.341407  | 0.464151  |
| 1 | 2.547479  | 2.184708  | -0.028128 |
| 1 | 1.450049  | 3.326296  | 0.486996  |
| 6 | 0.085394  | -0.398219 | 3.154882  |
| 6 | 1.228483  | 0.024449  | 3.851728  |
| 6 | -0.871384 | -1.185716 | 3.784741  |
| 1 | -0.047530 | -0.111373 | 2.120219  |
| 6 | 1.378760  | -0.369582 | 5.190763  |
| 6 | -0.719357 | -1.574407 | 5.115564  |
| 1 | -1.746108 | -1.497294 | 3.224401  |
| 6 | 0.415423  | -1.158186 | 5.810485  |
| 1 | 2.259727  | -0.056243 | 5.742395  |
| 1 | -1.468635 | -2.187896 | 5.600873  |
| 1 | 0.554222  | -1.448224 | 6.846270  |
| 7 | 2.219408  | 0.770828  | 3.215944  |
| 1 | 2.834343  | 1.280612  | 3.832300  |
| 1 | 1.943316  | 1.315398  | 2.406336  |

ANL2\_13

|   |           |           |          |
|---|-----------|-----------|----------|
| 6 | 0.684202  | 0.849656  | 0.339912 |
| 6 | -0.427585 | 0.156686  | 0.834394 |
| 6 | -0.745130 | -1.102921 | 0.339692 |

|   |           |           |           |
|---|-----------|-----------|-----------|
| 6 | 0.024405  | -1.692700 | -0.661762 |
| 6 | 1.125598  | -0.998864 | -1.163276 |
| 6 | 1.457425  | 0.257075  | -0.668045 |
| 1 | -1.030371 | 0.598921  | 1.618776  |
| 1 | -1.605050 | -1.625247 | 0.743820  |
| 1 | -0.230374 | -2.672325 | -1.047726 |
| 1 | 1.735227  | -1.439752 | -1.944265 |
| 1 | 2.325832  | 0.781929  | -1.053322 |
| 7 | 1.055952  | 2.085814  | 0.882853  |
| 1 | 1.511725  | 2.716062  | 0.238778  |
| 1 | 0.331890  | 2.545401  | 1.415691  |
| 6 | 0.572449  | 1.274018  | 4.075473  |
| 6 | 0.831482  | -0.085185 | 3.839970  |
| 6 | -0.701329 | 1.696285  | 4.439352  |
| 1 | 1.371839  | 1.995236  | 3.948669  |
| 6 | -0.215035 | -1.005392 | 4.007129  |
| 6 | -1.743616 | 0.780914  | 4.586504  |
| 1 | -0.879771 | 2.751818  | 4.614504  |
| 6 | -1.483117 | -0.573187 | 4.374073  |
| 1 | -0.032958 | -2.057613 | 3.816814  |
| 1 | -2.734283 | 1.114086  | 4.869838  |
| 1 | -2.277974 | -1.301750 | 4.488838  |
| 7 | 2.071706  | -0.500613 | 3.385525  |
| 1 | 2.313252  | -1.471129 | 3.500892  |
| 1 | 2.842708  | 0.139628  | 3.480602  |

ANL2\_14

|   |           |           |           |
|---|-----------|-----------|-----------|
| 6 | 0.107241  | 1.436693  | 0.351795  |
| 6 | -0.814279 | 0.418822  | 0.629589  |
| 6 | -0.449312 | -0.914366 | 0.501768  |
| 6 | 0.834032  | -1.265630 | 0.085948  |
| 6 | 1.751450  | -0.256154 | -0.196394 |
| 6 | 1.397365  | 1.083152  | -0.063508 |
| 1 | -1.805616 | 0.678023  | 0.984068  |
| 1 | -1.166391 | -1.687164 | 0.750826  |
| 1 | 1.114369  | -2.307794 | -0.002474 |
| 1 | 2.755285  | -0.509032 | -0.519967 |
| 1 | 2.124496  | 1.861662  | -0.271651 |
| 7 | -0.229317 | 2.779462  | 0.558603  |
| 1 | 0.283265  | 3.442655  | -0.004191 |
| 1 | -1.219590 | 2.975112  | 0.561510  |
| 6 | 1.067862  | -0.374672 | 3.463535  |
| 6 | 0.146355  | -1.392552 | 3.741330  |
| 6 | 0.702880  | 0.958512  | 3.591352  |
| 1 | 2.059204  | -0.633862 | 3.109062  |
| 6 | -1.143775 | -1.039025 | 4.156628  |
| 6 | -0.580470 | 1.309763  | 4.007166  |
| 1 | 1.419948  | 1.731316  | 3.342284  |
| 6 | -1.497877 | 0.300277  | 4.289508  |
| 1 | -1.870896 | -1.817543 | 4.364779  |
| 1 | -0.860822 | 2.351924  | 4.095579  |
| 1 | -2.501715 | 0.553146  | 4.613077  |
| 7 | 0.482931  | -2.735317 | 3.534534  |
| 1 | -0.029646 | -3.398515 | 4.097324  |
| 1 | 1.473206  | -2.930955 | 3.531624  |

ANL2\_15

|   |           |           |           |
|---|-----------|-----------|-----------|
| 6 | -0.327498 | 1.365807  | 0.352927  |
| 6 | -1.483670 | 0.698739  | -0.071544 |
| 6 | -1.486944 | -0.686252 | -0.207790 |
| 6 | -0.346070 | -1.431823 | 0.080213  |
| 6 | 0.804114  | -0.768673 | 0.505153  |
| 6 | 0.819494  | 0.613162  | 0.636407  |
| 1 | -2.382555 | 1.268744  | -0.284195 |
| 1 | -2.392161 | -1.183805 | -0.538479 |
| 1 | -0.353371 | -2.510788 | -0.010853 |
| 1 | 1.691561  | -1.335790 | 0.758651  |
| 1 | 1.710822  | 1.113594  | 0.997918  |
| 7 | -0.342541 | 2.749541  | 0.562974  |

|   |           |           |           |
|---|-----------|-----------|-----------|
| 1 | 0.566111  | 3.189065  | 0.572892  |
| 1 | -1.002380 | 3.263043  | -0.002915 |
| 6 | 1.483663  | -0.722573 | 4.164668  |
| 6 | 0.327476  | -1.389617 | 3.740197  |
| 6 | 1.486969  | 0.662418  | 4.300909  |
| 1 | 2.382533  | -1.292599 | 4.377328  |
| 6 | -0.819499 | -0.636946 | 3.456715  |
| 6 | 0.346112  | 1.408014  | 4.012903  |
| 1 | 2.392195  | 1.159950  | 4.631603  |
| 6 | -0.804086 | 0.744889  | 3.587965  |
| 1 | -1.710835 | -1.137360 | 3.095198  |
| 1 | 0.353438  | 2.486980  | 4.103968  |
| 1 | -1.691522 | 1.312025  | 3.334465  |
| 7 | 0.342486  | -2.773351 | 3.530152  |
| 1 | -0.566174 | -3.212859 | 3.520249  |
| 1 | 1.002330  | -3.286866 | 4.096022  |

ANL2\_16

|   |           |           |           |
|---|-----------|-----------|-----------|
| 6 | -0.354648 | 1.024028  | 1.067193  |
| 6 | -0.745495 | -0.177900 | 0.462973  |
| 6 | 0.036810  | -1.319993 | 0.599969  |
| 6 | 1.214620  | -1.288022 | 1.345740  |
| 6 | 1.603063  | -0.091730 | 1.946602  |
| 6 | 0.832345  | 1.057419  | 1.808602  |
| 1 | -1.668048 | -0.215461 | -0.107519 |
| 1 | -0.279421 | -2.240817 | 0.123031  |
| 1 | 1.820039  | -2.179625 | 1.453786  |
| 1 | 2.513831  | -0.047683 | 2.532609  |
| 1 | 1.135886  | 1.976271  | 2.296231  |
| 7 | -1.189468 | 2.153603  | 1.001053  |
| 1 | -0.724008 | 3.024108  | 1.218588  |
| 1 | -1.728318 | 2.227939  | 0.149109  |
| 1 | -2.247401 | 1.468563  | 3.082011  |
| 7 | -1.891493 | 1.154285  | 3.977325  |
| 1 | -1.676664 | 0.167292  | 3.943762  |
| 6 | -0.842437 | 1.941640  | 4.450407  |
| 6 | -0.818188 | 3.320212  | 4.187519  |
| 6 | 0.195038  | 1.388968  | 5.215229  |
| 6 | 0.228672  | 4.110240  | 4.650960  |
| 1 | -1.629635 | 3.763775  | 3.621165  |
| 6 | 1.233877  | 2.186910  | 5.679667  |
| 1 | 0.192115  | 0.324270  | 5.423354  |
| 6 | 1.267156  | 3.552444  | 5.396246  |
| 1 | 0.229195  | 5.172695  | 4.432882  |
| 1 | 2.029520  | 1.735526  | 6.262036  |
| 1 | 2.080785  | 4.170187  | 5.755918  |

ANL2\_17

|   |           |           |          |
|---|-----------|-----------|----------|
| 6 | -0.110095 | 1.045212  | 1.134967 |
| 6 | -0.860405 | 0.001724  | 0.577615 |
| 6 | -0.371403 | -1.300514 | 0.591593 |
| 6 | 0.866145  | -1.587605 | 1.166475 |
| 6 | 1.612318  | -0.548849 | 1.720775 |
| 6 | 1.136042  | 0.757475  | 1.704269 |
| 1 | -1.831018 | 0.213849  | 0.140705 |
| 1 | -0.964215 | -2.095267 | 0.153037 |
| 1 | 1.242945  | -2.602996 | 1.179212 |
| 1 | 2.575256  | -0.752535 | 2.174764 |
| 1 | 1.717596  | 1.552901  | 2.155158 |
| 7 | -0.643233 | 2.344823  | 1.198317 |
| 1 | 0.046239  | 3.066391  | 1.358693 |
| 1 | -1.255084 | 2.585353  | 0.430541 |
| 1 | -1.552275 | 1.842912  | 3.398459 |
| 7 | -1.169269 | 1.412047  | 4.231940 |
| 1 | -1.209705 | 0.404926  | 4.157735 |
| 6 | 0.094020  | 1.900531  | 4.563203 |
| 6 | 0.420995  | 3.242777  | 4.314968 |
| 6 | 1.055776  | 1.079774  | 5.169946 |
| 6 | 1.681555  | 3.734816  | 4.637028 |

|   |           |          |          |
|---|-----------|----------|----------|
| 1 | -0.324244 | 3.894242 | 3.872065 |
| 6 | 2.310709  | 1.581377 | 5.494196 |
| 1 | 0.819098  | 0.039083 | 5.364504 |
| 6 | 2.640440  | 2.909726 | 5.224228 |
| 1 | 1.914062  | 4.774359 | 4.432923 |
| 1 | 3.040970  | 0.925429 | 5.955065 |
| 1 | 3.621005  | 3.295778 | 5.474065 |

ANL2\_18

|   |           |           |           |
|---|-----------|-----------|-----------|
| 6 | 0.078061  | 1.013703  | 1.242665  |
| 6 | -0.907068 | 0.204533  | 0.661943  |
| 6 | -0.664285 | -1.146834 | 0.438319  |
| 6 | 0.557154  | -1.716906 | 0.795441  |
| 6 | 1.537040  | -0.911205 | 1.373116  |
| 6 | 1.307148  | 0.442447  | 1.593045  |
| 1 | -1.865847 | 0.636799  | 0.393863  |
| 1 | -1.437031 | -1.757481 | -0.014853 |
| 1 | 0.742282  | -2.770150 | 0.623496  |
| 1 | 2.491772  | -1.336598 | 1.660120  |
| 1 | 2.070403  | 1.053713  | 2.059956  |
| 7 | -0.199628 | 2.357928  | 1.547928  |
| 1 | 0.623004  | 2.923895  | 1.705124  |
| 1 | -0.839941 | 2.809674  | 0.909477  |
| 1 | -0.931694 | 1.681677  | 3.767311  |
| 7 | -0.542151 | 1.071838  | 4.476806  |
| 1 | -0.772913 | 0.108204  | 4.277829  |
| 6 | 0.817932  | 1.290629  | 4.692578  |
| 6 | 1.353267  | 2.583215  | 4.579457  |
| 6 | 1.676590  | 0.240680  | 5.049044  |
| 6 | 2.710296  | 2.807323  | 4.787028  |
| 1 | 0.693787  | 3.407722  | 4.332019  |
| 6 | 3.030105  | 0.474696  | 5.260788  |
| 1 | 1.278210  | -0.764582 | 5.136494  |
| 6 | 3.563167  | 1.756604  | 5.124132  |
| 1 | 3.103320  | 3.813606  | 4.690625  |
| 1 | 3.676155  | -0.354472 | 5.527337  |
| 1 | 4.619295  | 1.934259  | 5.285355  |

ANL2\_19

|   |           |           |           |
|---|-----------|-----------|-----------|
| 6 | 0.257479  | 0.819054  | 1.314535  |
| 6 | -0.901553 | 0.320965  | 0.705417  |
| 6 | -0.985276 | -1.020203 | 0.345688  |
| 6 | 0.077247  | -1.888777 | 0.592785  |
| 6 | 1.230306  | -1.392532 | 1.198782  |
| 6 | 1.327012  | -0.051739 | 1.554472  |
| 1 | -1.738865 | 0.986790  | 0.522213  |
| 1 | -1.888771 | -1.387845 | -0.127518 |
| 1 | 0.008064  | -2.933369 | 0.314932  |
| 1 | 2.065699  | -2.052693 | 1.401636  |
| 1 | 2.221723  | 0.317290  | 2.041833  |
| 7 | 0.307388  | 2.153048  | 1.756364  |
| 1 | 1.242492  | 2.495997  | 1.928757  |
| 1 | -0.223882 | 2.802134  | 1.192331  |
| 1 | -0.513323 | 1.441547  | 3.933292  |
| 7 | -0.261234 | 0.689792  | 4.564440  |
| 1 | -0.714564 | -0.169742 | 4.286725  |
| 6 | 1.116769  | 0.567145  | 4.738559  |
| 6 | 1.936053  | 1.706745  | 4.722987  |
| 6 | 1.714617  | -0.682608 | 4.956381  |
| 6 | 3.312147  | 1.590778  | 4.889579  |
| 1 | 1.481684  | 2.681457  | 4.583579  |
| 6 | 3.089696  | -0.788601 | 5.128208  |
| 1 | 1.094896  | -1.572966 | 4.967162  |
| 6 | 3.903767  | 0.343572  | 5.088331  |
| 1 | 3.926705  | 2.484261  | 4.870226  |
| 1 | 3.530343  | -1.766677 | 5.286784  |
| 1 | 4.975482  | 0.256488  | 5.217967  |

## ANL2\_20

|   |           |           |          |
|---|-----------|-----------|----------|
| 6 | 0.178162  | 0.503595  | 1.382220 |
| 6 | -1.165098 | 0.530920  | 0.985512 |
| 6 | -1.864243 | -0.655759 | 0.790230 |
| 6 | -1.242661 | -1.887264 | 0.993858 |
| 6 | 0.093986  | -1.913796 | 1.388459 |
| 6 | 0.803893  | -0.733268 | 1.578140 |
| 1 | -1.660917 | 1.485130  | 0.838461 |
| 1 | -2.902383 | -0.615819 | 0.480295 |
| 1 | -1.790366 | -2.809701 | 0.844563 |
| 1 | 0.593692  | -2.861199 | 1.554492 |
| 1 | 1.837094  | -0.767518 | 1.902994 |
| 7 | 0.857531  | 1.702159  | 1.663537 |
| 1 | 1.864320  | 1.612830  | 1.675704 |
| 1 | 0.565406  | 2.491504  | 1.103812 |
| 1 | 0.181017  | 1.515293  | 3.992988 |
| 7 | 0.191915  | 0.757658  | 4.665966 |
| 1 | -0.620242 | 0.168314  | 4.545519 |
| 6 | 1.397672  | 0.057424  | 4.674606 |
| 6 | 2.606430  | 0.726974  | 4.428099 |
| 6 | 1.439435  | -1.316827 | 4.951083 |
| 6 | 3.812073  | 0.033244  | 4.428831 |
| 1 | 2.589455  | 1.794987  | 4.240983 |
| 6 | 2.649235  | -2.000907 | 4.956000 |
| 1 | 0.512994  | -1.848839 | 5.139703 |
| 6 | 3.846240  | -1.336867 | 4.687031 |
| 1 | 4.733828  | 0.569926  | 4.232083 |
| 1 | 2.655681  | -3.065136 | 5.164143 |
| 1 | 4.786551  | -1.874246 | 4.687136 |

## ANL2\_21

|   |           |           |           |
|---|-----------|-----------|-----------|
| 6 | -0.076000 | 0.471894  | 1.564855  |
| 6 | -0.174997 | -0.915847 | 1.720192  |
| 6 | 0.426125  | -1.767089 | 0.799522  |
| 6 | 1.126369  | -1.257239 | -0.292609 |
| 6 | 1.218202  | 0.124920  | -0.452722 |
| 6 | 0.627490  | 0.984903  | 0.467406  |
| 1 | -0.700587 | -1.324934 | 2.574951  |
| 1 | 0.346141  | -2.838519 | 0.942643  |
| 1 | 1.590282  | -1.924584 | -1.008566 |
| 1 | 1.756268  | 0.539398  | -1.297755 |
| 1 | 0.716064  | 2.059414  | 0.342679  |
| 7 | -0.597275 | 1.340455  | 2.540105  |
| 1 | -0.901094 | 2.236612  | 2.184730  |
| 1 | -1.301930 | 0.921626  | 3.131540  |
| 1 | 2.668429  | 0.087028  | 3.318823  |
| 7 | 2.054055  | 0.357507  | 4.074349  |
| 1 | 1.476982  | 1.142699  | 3.795976  |
| 6 | 1.313428  | -0.699602 | 4.601835  |
| 6 | 1.715675  | -2.031074 | 4.422583  |
| 6 | 0.153151  | -0.446529 | 5.350080  |
| 6 | 0.966722  | -3.073984 | 4.954571  |
| 1 | 2.608154  | -2.242671 | 3.843261  |
| 6 | -0.593834 | -1.496665 | 5.873591  |
| 1 | -0.152195 | 0.580163  | 5.519250  |
| 6 | -0.199003 | -2.819799 | 5.677476  |
| 1 | 1.293002  | -4.095868 | 4.795690  |
| 1 | -1.489177 | -1.278275 | 6.445462  |
| 1 | -0.782569 | -3.635330 | 6.086526  |

## ANL2\_22

|   |           |           |           |
|---|-----------|-----------|-----------|
| 6 | -0.256573 | 0.531508  | 1.637043  |
| 6 | -0.696660 | -0.796524 | 1.686131  |
| 6 | -0.271345 | -1.709904 | 0.727780  |
| 6 | 0.588584  | -1.320058 | -0.297686 |
| 6 | 1.020632  | 0.004628  | -0.352207 |
| 6 | 0.607547  | 0.923947  | 0.606626  |
| 1 | -1.350361 | -1.116869 | 2.488790  |
| 1 | -0.615793 | -2.735814 | 0.788664  |

|   |           |           |           |
|---|-----------|-----------|-----------|
| 1 | 0.914590  | -2.034682 | -1.043471 |
| 1 | 1.687208  | 0.326520  | -1.144325 |
| 1 | 0.960088  | 1.949582  | 0.564616  |
| 7 | -0.603240 | 1.438658  | 2.653970  |
| 1 | -0.661746 | 2.402353  | 2.354696  |
| 1 | -1.418769 | 1.169246  | 3.186963  |
| 1 | 2.215734  | -0.623276 | 3.456519  |
| 7 | 1.645799  | -0.258210 | 4.207074  |
| 1 | 1.291605  | 0.660312  | 3.966465  |
| 6 | 0.644329  | -1.132332 | 4.628049  |
| 6 | 0.721281  | -2.507896 | 4.366029  |
| 6 | -0.458314 | -0.649817 | 5.350210  |
| 6 | -0.285058 | -3.366522 | 4.792230  |
| 1 | 1.565532  | -2.895192 | 3.805539  |
| 6 | -1.464044 | -1.515386 | 5.767503  |
| 1 | -0.514623 | 0.407756  | 5.583275  |
| 6 | -1.391362 | -2.880011 | 5.489019  |
| 1 | -0.207850 | -4.425219 | 4.570534  |
| 1 | -2.309027 | -1.120351 | 6.320964  |
| 1 | -2.175893 | -3.551515 | 5.815446  |

ANL-iC3H7I\_1

|    |           |           |           |
|----|-----------|-----------|-----------|
| 6  | 3.946650  | -1.206122 | -0.074539 |
| 6  | 3.654500  | -0.000030 | -0.723678 |
| 6  | 3.946629  | 1.206122  | -0.074643 |
| 6  | 4.523933  | 1.201075  | 1.190278  |
| 6  | 4.819060  | 0.000090  | 1.833382  |
| 6  | 4.523954  | -1.200957 | 1.190381  |
| 1  | 3.709255  | -2.146141 | -0.561232 |
| 1  | 3.709217  | 2.146094  | -0.561417 |
| 1  | 4.743358  | 2.144846  | 1.676422  |
| 1  | 5.268501  | 0.000136  | 2.818630  |
| 1  | 4.743395  | -2.144682 | 1.676607  |
| 1  | 3.126696  | -0.837763 | -2.517051 |
| 1  | 3.126686  | 0.837536  | -2.517126 |
| 53 | -0.072721 | -0.000027 | -0.956031 |
| 7  | 3.009992  | -0.000090 | -1.965850 |
| 6  | -2.150950 | 0.000029  | -0.154037 |
| 6  | -2.385075 | 1.270624  | 0.645687  |
| 6  | -2.385212 | -1.270650 | 0.645513  |
| 1  | -2.747764 | 0.000124  | -1.064614 |
| 1  | -2.217429 | 2.165015  | 0.044662  |
| 1  | -3.421959 | 1.286119  | 1.002848  |
| 1  | -1.726583 | 1.314029  | 1.516136  |
| 1  | -2.217661 | -2.164976 | 0.044365  |
| 1  | -3.422098 | -1.286083 | 1.002670  |
| 1  | -1.726726 | -1.314244 | 1.515957  |

ANL-iC3H7I\_2

|    |           |           |           |
|----|-----------|-----------|-----------|
| 6  | -4.097939 | 0.976387  | 0.536319  |
| 6  | -3.689163 | 0.513120  | -0.720536 |
| 6  | -3.884168 | -0.836186 | -1.040943 |
| 6  | -4.481000 | -1.696189 | -0.125747 |
| 6  | -4.892236 | -1.232947 | 1.122968  |
| 6  | -4.693873 | 0.108754  | 1.444786  |
| 1  | -3.935966 | 2.015788  | 0.801304  |
| 1  | -3.556424 | -1.209290 | -2.005454 |
| 1  | -4.624172 | -2.737203 | -0.392178 |
| 1  | -5.356497 | -1.905755 | 1.833254  |
| 1  | -5.004138 | 0.485986  | 2.412576  |
| 1  | -3.209085 | 2.351012  | -1.487402 |
| 1  | -3.056173 | 1.091268  | -2.581116 |
| 53 | 0.012131  | 0.923582  | -0.556945 |
| 7  | -3.025878 | 1.365858  | -1.610134 |
| 6  | 2.050783  | 0.552124  | 0.260155  |
| 6  | 2.831567  | -0.327795 | -0.701502 |
| 6  | 1.935944  | -0.031250 | 1.658489  |
| 1  | 2.469979  | 1.556415  | 0.292685  |
| 1  | 1.377586  | 0.624702  | 2.327158  |



|   |          |           |           |
|---|----------|-----------|-----------|
| 1 | 2.941060 | -0.171489 | 2.074487  |
| 1 | 1.438608 | -1.003577 | 1.639249  |
| 1 | 2.902873 | 0.119073  | -1.693709 |
| 1 | 3.848034 | -0.470890 | -0.315206 |
| 1 | 2.366162 | -1.311092 | -0.800580 |

ANL-nC3F7I\_d\_1

|    |           |           |           |
|----|-----------|-----------|-----------|
| 6  | 4.119420  | -1.153726 | -0.208074 |
| 6  | 3.697497  | 0.048913  | -0.781575 |
| 6  | 3.986628  | 1.255432  | -0.138094 |
| 6  | 4.697426  | 1.255117  | 1.057615  |
| 6  | 5.124164  | 0.057558  | 1.628166  |
| 6  | 4.829594  | -1.144588 | 0.988008  |
| 1  | 3.883047  | -2.093876 | -0.694925 |
| 1  | 3.646460  | 2.190480  | -0.570192 |
| 1  | 4.915877  | 2.197574  | 1.545833  |
| 1  | 5.675656  | 0.060912  | 2.560010  |
| 1  | 5.151890  | -2.084011 | 1.421517  |
| 1  | 3.052934  | -0.769519 | -2.542275 |
| 1  | 2.966372  | 0.890282  | -2.497083 |
| 53 | 0.167801  | -0.114866 | -0.922116 |
| 7  | 2.906432  | 0.039540  | -1.952210 |
| 6  | -1.876213 | -0.261084 | -0.120551 |
| 6  | -2.097127 | 0.389979  | 1.277237  |
| 6  | -1.396797 | -0.278266 | 2.499576  |
| 9  | -2.722387 | 0.366585  | -0.971033 |
| 9  | -2.254694 | -1.558523 | -0.054284 |
| 9  | -1.696170 | 1.680516  | 1.224638  |
| 9  | -3.428104 | 0.370434  | 1.538839  |
| 9  | -1.738097 | 0.393033  | 3.607487  |
| 9  | -1.784216 | -1.550252 | 2.638161  |
| 9  | -0.065771 | -0.244416 | 2.381118  |

ANL-nC3F7I\_d\_2

|    |           |           |           |
|----|-----------|-----------|-----------|
| 6  | 3.541305  | -0.788798 | 0.952683  |
| 6  | 3.584898  | -0.783671 | -0.444220 |
| 6  | 3.941811  | 0.388798  | -1.115997 |
| 6  | 4.260050  | 1.535650  | -0.395993 |
| 6  | 4.222932  | 1.531099  | 0.996984  |
| 6  | 3.860992  | 0.362746  | 1.664576  |
| 1  | 3.248699  | -1.691467 | 1.478372  |
| 1  | 3.960455  | 0.402905  | -2.200520 |
| 1  | 4.536101  | 2.437848  | -0.929038 |
| 1  | 4.469478  | 2.426191  | 1.554220  |
| 1  | 3.824316  | 0.345059  | 2.747471  |
| 1  | 3.305587  | -2.797347 | -0.673254 |
| 1  | 3.586990  | -1.987909 | -2.098069 |
| 53 | 0.302586  | -1.523877 | -1.532234 |
| 7  | 3.182551  | -1.925628 | -1.172440 |
| 6  | -1.863311 | -1.210244 | -1.761143 |
| 6  | -2.323230 | 0.276728  | -1.823507 |
| 6  | -2.173266 | 1.129878  | -0.527062 |
| 9  | -2.527769 | -1.823085 | -0.754212 |
| 9  | -2.264974 | -1.782057 | -2.920882 |
| 9  | -3.641724 | 0.290637  | -2.142407 |
| 9  | -1.643338 | 0.901620  | -2.811572 |
| 9  | -2.861047 | 0.590465  | 0.484489  |
| 9  | -2.657448 | 2.356281  | -0.763917 |
| 9  | -0.892596 | 1.247010  | -0.162409 |

ANL-nC3F7I\_s\_1

|   |           |           |           |
|---|-----------|-----------|-----------|
| 6 | -4.090837 | 0.373509  | -1.197488 |
| 6 | -3.855007 | -0.337406 | -0.017400 |
| 6 | -4.124788 | 0.266775  | 1.213779  |
| 6 | -4.633515 | 1.560661  | 1.259161  |
| 6 | -4.875402 | 2.268810  | 0.083615  |
| 6 | -4.599669 | 1.666997  | -1.142622 |
| 1 | -3.867575 | -0.084525 | -2.155162 |

|    |           |           |           |
|----|-----------|-----------|-----------|
| 1  | -3.927851 | -0.274592 | 2.132963  |
| 1  | -4.839556 | 2.016889  | 2.220298  |
| 1  | -5.269967 | 3.276430  | 0.122669  |
| 1  | -4.779142 | 2.206679  | -2.065034 |
| 1  | -3.451579 | -2.126556 | -0.923109 |
| 1  | -3.474682 | -2.200014 | 0.737743  |
| 53 | -0.373985 | -1.144704 | -0.014694 |
| 7  | -3.267346 | -1.621009 | -0.065966 |
| 6  | 1.805039  | -0.813938 | 0.024542  |
| 6  | 2.164714  | 0.695696  | -0.023555 |
| 6  | 3.688211  | 1.036897  | 0.000063  |
| 9  | 2.379802  | -1.433283 | -1.031584 |
| 9  | 2.328050  | -1.351374 | 1.150080  |
| 9  | 1.655601  | 1.229206  | -1.156981 |
| 9  | 1.603117  | 1.311516  | 1.041251  |
| 9  | 3.837518  | 2.367660  | -0.045439 |
| 9  | 4.264188  | 0.584760  | 1.118653  |
| 9  | 4.315581  | 0.505020  | -1.054036 |

ANL-nc3F7I\_s\_2

|    |           |           |           |
|----|-----------|-----------|-----------|
| 6  | -4.414795 | -0.193666 | -1.231372 |
| 6  | -3.989756 | -0.696693 | 0.001466  |
| 6  | -4.450443 | -0.104005 | 1.180575  |
| 6  | -5.332693 | 0.969838  | 1.122914  |
| 6  | -5.762971 | 1.468601  | -0.105159 |
| 6  | -5.297240 | 0.880694  | -1.279553 |
| 1  | -4.047694 | -0.639505 | -2.149619 |
| 1  | -4.110893 | -0.480338 | 2.139658  |
| 1  | -5.683618 | 1.419067  | 2.044529  |
| 1  | -6.448997 | 2.305362  | -0.146278 |
| 1  | -5.620187 | 1.259836  | -2.241987 |
| 1  | -3.046030 | -2.345841 | -0.755265 |
| 1  | -3.071627 | -2.284901 | 0.905674  |
| 53 | -0.405972 | -0.447072 | 0.045183  |
| 7  | -3.037605 | -1.738664 | 0.054347  |
| 6  | 1.518838  | 0.628380  | 0.041548  |
| 6  | 2.728352  | -0.342336 | -0.029660 |
| 6  | 4.140648  | 0.323394  | -0.038143 |
| 9  | 1.570572  | 1.467146  | -1.017790 |
| 9  | 1.625694  | 1.375885  | 1.163492  |
| 9  | 2.630432  | -1.079924 | -1.159161 |
| 9  | 2.686564  | -1.171033 | 1.038524  |
| 9  | 4.286510  | 1.125939  | -1.097201 |
| 9  | 4.342279  | 1.035597  | 1.074968  |
| 9  | 5.073837  | -0.636294 | -0.102022 |

ANL-nc3H7I\_d\_1

|    |           |           |           |
|----|-----------|-----------|-----------|
| 6  | 3.649457  | -1.169594 | -0.122413 |
| 6  | 3.495730  | 0.027041  | -0.834236 |
| 6  | 3.438067  | 1.232185  | -0.122411 |
| 6  | 3.540035  | 1.236298  | 1.264122  |
| 6  | 3.698249  | 0.045000  | 1.970231  |
| 6  | 3.750444  | -1.155741 | 1.264168  |
| 1  | 3.673553  | -2.111464 | -0.660039 |
| 1  | 3.296712  | 2.163498  | -0.660259 |
| 1  | 3.491265  | 2.179643  | 1.796107  |
| 1  | 3.773628  | 0.051453  | 3.050445  |
| 1  | 3.866331  | -2.093036 | 1.796355  |
| 1  | 3.688768  | -0.796312 | -2.697964 |
| 1  | 3.537947  | 0.872759  | -2.697433 |
| 53 | -0.069844 | -0.152991 | -1.471176 |
| 7  | 3.317055  | 0.011295  | -2.220253 |
| 6  | -1.679896 | -0.127899 | 0.034699  |
| 6  | -1.224967 | 0.458812  | 1.360865  |
| 1  | -1.985391 | -1.168632 | 0.123386  |
| 1  | -0.886349 | 1.487607  | 1.207743  |
| 1  | -2.119628 | 0.516907  | 1.996225  |
| 1  | -2.475359 | 0.450754  | -0.427260 |
| 6  | -0.143540 | -0.349549 | 2.076046  |

|   |           |           |          |
|---|-----------|-----------|----------|
| 1 | 0.783135  | -0.369578 | 1.500720 |
| 1 | 0.080771  | 0.084584  | 3.053157 |
| 1 | -0.466900 | -1.383268 | 2.233081 |

ANL-nC3H7I\_d\_2

|    |           |           |           |
|----|-----------|-----------|-----------|
| 6  | 3.114886  | 0.019500  | -1.285294 |
| 6  | 2.545285  | 0.838518  | -0.302571 |
| 6  | 2.904257  | 0.639826  | 1.036336  |
| 6  | 3.817876  | -0.350901 | 1.378654  |
| 6  | 4.388423  | -1.162162 | 0.399223  |
| 6  | 4.027565  | -0.968683 | -0.933176 |
| 1  | 2.831182  | 0.154084  | -2.323698 |
| 1  | 2.456198  | 1.257707  | 1.807260  |
| 1  | 4.083913  | -0.489470 | 2.420363  |
| 1  | 5.099313  | -1.932993 | 0.669687  |
| 1  | 4.458427  | -1.592581 | -1.707930 |
| 1  | 1.604624  | 2.114854  | -1.598974 |
| 1  | 1.460746  | 2.546896  | 0.012075  |
| 53 | -1.095699 | -0.006067 | -0.364540 |
| 7  | 1.574424  | 1.787992  | -0.644139 |
| 6  | -2.874920 | -1.298560 | -0.173241 |
| 6  | -4.185899 | -0.554246 | -0.368647 |
| 1  | -2.791228 | -1.735003 | 0.820488  |
| 1  | -4.196097 | -0.083460 | -1.355984 |
| 1  | -4.980011 | -1.313272 | -0.378957 |
| 1  | -2.722694 | -2.070562 | -0.923224 |
| 6  | -4.491494 | 0.480959  | 0.712676  |
| 1  | -3.739165 | 1.272485  | 0.719897  |
| 1  | -5.468008 | 0.941848  | 0.546383  |
| 1  | -4.501386 | 0.019501  | 1.704783  |

ANL-nC3H7I\_s\_1

|    |           |           |           |
|----|-----------|-----------|-----------|
| 6  | 3.942061  | -1.201798 | -0.071891 |
| 6  | 3.639391  | 0.005150  | -0.714243 |
| 6  | 3.927005  | 1.210404  | -0.061870 |
| 6  | 4.510715  | 1.203724  | 1.200138  |
| 6  | 4.816401  | 0.001899  | 1.836642  |
| 6  | 4.525708  | -1.198318 | 1.190159  |
| 1  | 3.708010  | -2.141221 | -0.561337 |
| 1  | 3.681220  | 2.150866  | -0.543505 |
| 1  | 4.726634  | 2.146780  | 1.689196  |
| 1  | 5.270819  | 0.000652  | 2.819602  |
| 1  | 4.753408  | -2.142637 | 1.671375  |
| 1  | 3.110465  | -0.827875 | -2.509031 |
| 1  | 3.100012  | 0.846392  | -2.502074 |
| 53 | -0.070155 | -0.017123 | -0.937278 |
| 7  | 2.987497  | 0.006229  | -1.953489 |
| 6  | -2.118460 | -0.033288 | -0.132801 |
| 6  | -2.141398 | -0.039666 | 1.386964  |
| 1  | -2.580766 | -0.922444 | -0.557061 |
| 1  | -1.599377 | -0.914248 | 1.756811  |
| 1  | -1.610388 | 0.838595  | 1.764000  |
| 1  | -2.591922 | 0.853438  | -0.549778 |
| 6  | -3.579254 | -0.050885 | 1.920259  |
| 1  | -3.587184 | -0.055418 | 3.013178  |
| 1  | -4.133563 | 0.830843  | 1.585802  |
| 1  | -4.122460 | -0.936733 | 1.578550  |

ANL-nC3H7I\_s\_2

|   |          |           |           |
|---|----------|-----------|-----------|
| 6 | 3.971294 | -1.212095 | -0.039103 |
| 6 | 3.679950 | -0.008433 | -0.692749 |
| 6 | 3.990195 | 1.200088  | -0.057012 |
| 6 | 4.585129 | 1.199671  | 1.199781  |
| 6 | 4.879784 | 0.001025  | 1.847365  |
| 6 | 4.566311 | -1.202340 | 1.217612  |
| 1 | 3.719854 | -2.153675 | -0.515626 |
| 1 | 3.753503 | 2.138316  | -0.547497 |
| 1 | 4.818533 | 2.145116  | 1.676001  |

|    |           |           |           |
|----|-----------|-----------|-----------|
| 1  | 5.342832  | 0.004664  | 2.826275  |
| 1  | 4.784926  | -2.144151 | 1.707844  |
| 1  | 3.126466  | -0.854390 | -2.473880 |
| 1  | 3.139466  | 0.819594  | -2.486256 |
| 53 | -0.051823 | 0.017257  | -0.961900 |
| 7  | 3.018591  | -0.012422 | -1.927091 |
| 6  | -2.136702 | 0.037428  | -0.257587 |
| 6  | -3.137905 | 0.033092  | -1.401035 |
| 1  | -2.215574 | 0.931591  | 0.357704  |
| 1  | -2.965085 | 0.902687  | -2.041030 |
| 1  | -2.976435 | -0.850618 | -2.024444 |
| 1  | -2.227072 | -0.843835 | 0.374506  |
| 6  | -4.579393 | 0.047373  | -0.877604 |
| 1  | -5.292825 | 0.044160  | -1.705628 |
| 1  | -4.784536 | -0.829251 | -0.256383 |
| 1  | -4.773097 | 0.938173  | -0.273099 |

pyCH3-iC3H7I

|    |           |           |           |
|----|-----------|-----------|-----------|
| 6  | -3.584088 | 1.140730  | -0.007423 |
| 6  | -4.971874 | 1.190608  | 0.080211  |
| 6  | -5.700717 | -0.000005 | 0.125346  |
| 6  | -4.971484 | -1.190504 | 0.083583  |
| 6  | -3.583715 | -1.140420 | -0.004193 |
| 7  | -2.891361 | 0.000206  | -0.049970 |
| 1  | -2.999578 | 2.055325  | -0.042455 |
| 1  | -5.477218 | 2.149263  | 0.115506  |
| 1  | -5.476515 | -2.149220 | 0.121593  |
| 1  | -2.998903 | -2.054917 | -0.036636 |
| 6  | -7.204180 | -0.000160 | 0.190183  |
| 1  | -7.629595 | -0.001652 | -0.818656 |
| 1  | -7.579393 | -0.885542 | 0.706936  |
| 1  | -7.579683 | 0.886554  | 0.704436  |
| 6  | 2.437771  | -0.000431 | -0.400129 |
| 6  | 2.991651  | -1.269845 | 0.226705  |
| 6  | 2.991899  | 1.270040  | 0.224344  |
| 53 | 0.216595  | -0.000078 | -0.255718 |
| 1  | 2.600960  | -0.001449 | -1.476938 |
| 1  | 2.761994  | 1.315537  | 1.291504  |
| 1  | 4.082878  | 1.285747  | 0.111442  |
| 1  | 2.586753  | 2.164699  | -0.250133 |
| 1  | 4.082627  | -1.285978 | 0.113828  |
| 1  | 2.586327  | -2.165308 | -0.246101 |
| 1  | 2.761744  | -1.313310 | 1.293950  |

pyCH3\_nC3F7I\_d

|   |           |           |           |
|---|-----------|-----------|-----------|
| 6 | 3.822021  | -0.548696 | 0.928918  |
| 6 | 5.201778  | -0.633113 | 1.072231  |
| 6 | 6.030151  | 0.071431  | 0.195006  |
| 6 | 5.404791  | 0.830300  | -0.797552 |
| 6 | 4.017062  | 0.857441  | -0.867479 |
| 7 | 3.233081  | 0.182498  | -0.021810 |
| 1 | 3.159189  | -1.087997 | 1.598035  |
| 1 | 5.624466  | -1.245489 | 1.860216  |
| 1 | 5.990808  | 1.394836  | -1.513430 |
| 1 | 3.509860  | 1.439286  | -1.630412 |
| 6 | 7.527663  | 0.034370  | 0.328527  |
| 1 | 7.869034  | 0.835822  | 0.991616  |
| 1 | 7.865208  | -0.912020 | 0.754565  |
| 1 | 8.016202  | 0.175181  | -0.637192 |
| 6 | -1.766754 | 0.382997  | -0.462798 |
| 6 | -2.595179 | 0.493379  | 0.850487  |
| 6 | -2.616920 | -0.750738 | 1.789172  |
| 9 | -3.130765 | -1.815863 | 1.166685  |
| 9 | -3.381107 | -0.472616 | 2.854281  |
| 9 | -1.389432 | -1.059444 | 2.224472  |
| 9 | -2.138346 | 1.544681  | 1.569185  |
| 9 | -3.887235 | 0.740969  | 0.516234  |
| 9 | -2.205422 | -0.700611 | -1.150349 |
| 9 | -2.077086 | 1.479970  | -1.198292 |

|                |           |           |           |
|----------------|-----------|-----------|-----------|
| 53             | 0.422496  | 0.293461  | -0.220706 |
| pyCH3_nC3F7I_s |           |           |           |
| 6              | -4.115983 | -1.126671 | -0.241065 |
| 6              | -5.490154 | -1.155125 | -0.446872 |
| 6              | -6.210083 | 0.042219  | -0.459123 |
| 6              | -5.487148 | 1.220025  | -0.253702 |
| 6              | -4.113088 | 1.155226  | -0.055472 |
| 7              | -3.432715 | 0.005317  | -0.048680 |
| 1              | -3.536596 | -2.044279 | -0.226835 |
| 1              | -5.992799 | -2.104024 | -0.593706 |
| 1              | -5.987372 | 2.181441  | -0.245172 |
| 1              | -3.531399 | 2.057015  | 0.106737  |
| 6              | -7.693284 | 0.064230  | -0.706979 |
| 1              | -7.897211 | 0.150826  | -1.779110 |
| 1              | -8.168646 | -0.852653 | -0.354162 |
| 1              | -8.166218 | 0.914133  | -0.211891 |
| 6              | 1.535816  | -0.065363 | 0.740156  |
| 6              | 2.373996  | 0.049145  | -0.560595 |
| 6              | 3.924954  | 0.033867  | -0.384875 |
| 9              | 4.502351  | 0.139508  | -1.590485 |
| 9              | 4.334396  | -1.107073 | 0.179481  |
| 9              | 4.334221  | 1.059401  | 0.369222  |
| 9              | 2.058562  | -0.983738 | -1.376041 |
| 9              | 2.058363  | 1.208462  | -1.183236 |
| 9              | 1.870718  | -1.218045 | 1.369463  |
| 9              | 1.871171  | 0.959288  | 1.561439  |
| 53             | -0.635298 | -0.030263 | 0.346957  |

|                |           |           |           |
|----------------|-----------|-----------|-----------|
| pyCH3-nC3H7I_d |           |           |           |
| 6              | 3.468308  | 1.215244  | 0.296184  |
| 6              | 4.816277  | 1.560154  | 0.286431  |
| 6              | 5.771237  | 0.591143  | -0.029494 |
| 6              | 5.299992  | -0.691921 | -0.316917 |
| 6              | 3.931821  | -0.942408 | -0.281993 |
| 7              | 3.022264  | -0.011945 | 0.017550  |
| 1              | 2.710825  | 1.953998  | 0.540651  |
| 1              | 5.116515  | 2.574104  | 0.525916  |
| 1              | 5.989744  | -1.491388 | -0.563300 |
| 1              | 3.545811  | -1.933532 | -0.501033 |
| 6              | 7.238657  | 0.920363  | -0.082641 |
| 1              | 7.521091  | 1.242516  | -1.090203 |
| 1              | 7.489126  | 1.730753  | 0.604514  |
| 1              | 7.849966  | 0.051459  | 0.168459  |
| 6              | -2.159965 | -1.159796 | 0.098633  |
| 6              | -2.920250 | -0.616138 | -1.101516 |
| 6              | -2.534753 | -1.256808 | -2.434173 |
| 53             | -0.002950 | -0.691058 | 0.056687  |
| 1              | -2.209691 | -2.245991 | 0.157775  |
| 1              | -2.511042 | -0.731116 | 1.034231  |
| 1              | -2.791763 | 0.469042  | -1.154676 |
| 1              | -3.987459 | -0.792946 | -0.909931 |
| 1              | -2.675002 | -2.341638 | -2.401548 |
| 1              | -3.147626 | -0.862969 | -3.248577 |
| 1              | -1.487008 | -1.062585 | -2.672905 |

|                |          |           |           |
|----------------|----------|-----------|-----------|
| pyCH3-nC3H7I_s |          |           |           |
| 6              | 3.862942 | -1.120421 | 0.213632  |
| 6              | 5.241638 | -1.142632 | 0.399645  |
| 6              | 5.965023 | 0.049545  | 0.320512  |
| 6              | 5.240858 | 1.212515  | 0.048627  |
| 6              | 3.862196 | 1.136135  | -0.122692 |
| 7              | 3.174531 | -0.005556 | -0.042995 |
| 1              | 3.282960 | -2.036782 | 0.269993  |
| 1              | 5.744755 | -2.081668 | 0.601321  |
| 1              | 5.743348 | 2.169874  | -0.032342 |
| 1              | 3.281615 | 2.028729  | -0.335944 |
| 6              | 7.452919 | 0.083209  | 0.543077  |

|    |           |           |           |
|----|-----------|-----------|-----------|
| 1  | 7.676593  | 0.241283  | 1.603131  |
| 1  | 7.920555  | -0.856967 | 0.244618  |
| 1  | 7.919977  | 0.895786  | -0.016628 |
| 6  | -2.078535 | -0.104038 | -0.691110 |
| 6  | -2.826759 | 0.093193  | 0.617841  |
| 6  | -4.345215 | 0.060981  | 0.405726  |
| 53 | 0.106718  | -0.064150 | -0.428748 |
| 1  | -2.294053 | 0.684876  | -1.409647 |
| 1  | -2.293785 | -1.069798 | -1.145100 |
| 1  | -2.533290 | -0.686182 | 1.326711  |
| 1  | -2.533555 | 1.047009  | 1.065404  |
| 1  | -4.666591 | 0.851358  | -0.278935 |
| 1  | -4.666324 | -0.896218 | -0.015458 |
| 1  | -4.873799 | 0.203552  | 1.351901  |

pyNR2-iC3F7I\_dimlam

|    |           |           |           |
|----|-----------|-----------|-----------|
| 6  | 0.835725  | -1.560272 | 1.131529  |
| 6  | -0.426952 | -2.136580 | 1.193497  |
| 6  | -1.103611 | -2.438271 | 0.000430  |
| 6  | -0.427544 | -2.137979 | -1.193317 |
| 6  | 0.835168  | -1.561596 | -1.132644 |
| 7  | 1.480455  | -1.266548 | -0.000891 |
| 1  | 1.357628  | -1.325093 | 2.054484  |
| 1  | -0.860965 | -2.336158 | 2.161679  |
| 1  | -0.862028 | -2.338701 | -2.161053 |
| 1  | 1.356614  | -1.327501 | -2.056133 |
| 7  | -2.404489 | -2.965065 | 0.001038  |
| 6  | -2.863885 | -3.621849 | -1.224837 |
| 1  | -2.836998 | -2.929314 | -2.064583 |
| 1  | -2.259125 | -4.504221 | -1.470047 |
| 1  | -3.899592 | -3.927405 | -1.085663 |
| 6  | -2.863245 | -3.620740 | 1.227751  |
| 1  | -2.258325 | -4.502863 | 1.473466  |
| 1  | -2.835975 | -2.927450 | 2.066858  |
| 1  | -3.899009 | -3.926464 | 1.089378  |
| 53 | -3.976667 | -0.507073 | 0.000356  |
| 6  | -5.164857 | 1.356505  | -0.000248 |
| 6  | -6.006572 | 1.449824  | -1.297502 |
| 6  | -6.006188 | 1.450915  | 1.297163  |
| 9  | -4.318165 | 2.431526  | -0.000822 |
| 9  | -6.688929 | 2.604567  | -1.349892 |
| 9  | -5.203867 | 1.406847  | -2.370062 |
| 9  | -6.886587 | 0.441986  | -1.383404 |
| 9  | -6.886234 | 0.443193  | 1.384119  |
| 9  | -5.203197 | 1.408762  | 2.369548  |
| 9  | -6.688468 | 2.605735  | 1.348836  |

pyNR2-iC3F7I\_dim2am

|    |           |           |           |
|----|-----------|-----------|-----------|
| 6  | 0.678880  | 1.688420  | -1.132811 |
| 6  | -0.574996 | 2.283732  | -1.193813 |
| 6  | -1.246529 | 2.594670  | -0.000233 |
| 6  | -0.574552 | 2.283358  | 1.192990  |
| 6  | 0.679306  | 1.688067  | 1.131336  |
| 7  | 1.319571  | 1.384117  | -0.000903 |
| 1  | 1.196766  | 1.446002  | -2.056149 |
| 1  | -1.006345 | 2.490575  | -2.161664 |
| 1  | -1.005554 | 2.489900  | 2.161065  |
| 1  | 1.197530  | 1.445357  | 2.054408  |
| 7  | -2.539531 | 3.140348  | 0.000147  |
| 6  | -2.989204 | 3.802183  | 1.226853  |
| 1  | -2.972072 | 3.108281  | 2.065743  |
| 1  | -2.371859 | 4.675515  | 1.473059  |
| 1  | -4.020495 | 4.122665  | 1.088419  |
| 6  | -2.989802 | 3.802707  | -1.226064 |
| 1  | -2.372602 | 4.676167  | -1.472177 |
| 1  | -2.973059 | 3.109181  | -2.065268 |
| 1  | -4.021039 | 4.123096  | -1.087006 |
| 53 | -4.132199 | 0.695604  | -0.000023 |
| 6  | -5.441524 | -1.084424 | -0.000152 |

|   |           |           |           |
|---|-----------|-----------|-----------|
| 6 | -5.225148 | -1.903082 | -1.297417 |
| 6 | -5.226250 | -1.902438 | 1.297708  |
| 9 | -6.750511 | -0.682124 | -0.000789 |
| 9 | -6.056555 | -2.955969 | -1.349301 |
| 9 | -5.477549 | -1.138008 | -2.369553 |
| 9 | -3.968701 | -2.358540 | -1.384485 |
| 9 | -3.969890 | -2.357906 | 1.386043  |
| 9 | -5.479471 | -1.136764 | 2.369223  |
| 9 | -6.057763 | -2.955251 | 1.349435  |

pyNR2-iC3F7I\_trm1

|    |           |           |           |
|----|-----------|-----------|-----------|
| 6  | -0.797901 | 1.523628  | 1.140695  |
| 6  | 0.441892  | 2.139102  | 1.197200  |
| 6  | 1.110050  | 2.460018  | 0.000545  |
| 6  | 0.441899  | 2.139688  | -1.196271 |
| 6  | -0.797894 | 1.524186  | -1.140075 |
| 7  | -1.421636 | 1.212887  | 0.000232  |
| 1  | -1.320142 | 1.269552  | 2.057299  |
| 1  | 0.869458  | 2.355850  | 2.164047  |
| 1  | 0.869471  | 2.356907  | -2.163010 |
| 1  | -1.320129 | 1.270559  | -2.056806 |
| 7  | 2.384125  | 3.022203  | 0.000686  |
| 6  | 2.855441  | 3.658012  | -1.231300 |
| 1  | 2.852930  | 2.946892  | -2.056200 |
| 1  | 2.243976  | 4.526531  | -1.505768 |
| 1  | 3.883993  | 3.980931  | -1.081619 |
| 6  | 2.855447  | 3.657381  | 1.232994  |
| 1  | 2.243983  | 4.525759  | 1.507911  |
| 1  | 2.852938  | 2.945837  | 2.057529  |
| 1  | 3.883998  | 3.980377  | 1.083475  |
| 6  | -5.912274 | -0.961022 | -0.000320 |
| 6  | -6.687131 | -0.617937 | -1.293171 |
| 6  | -6.686907 | -0.619053 | 1.292960  |
| 9  | -5.735241 | -2.323945 | -0.000924 |
| 9  | -5.976510 | -0.988701 | -2.369364 |
| 9  | -6.936020 | 0.697350  | -1.382586 |
| 9  | -7.864259 | -1.265677 | -1.350355 |
| 9  | -6.935780 | 0.696157  | 1.383554  |
| 9  | -7.864026 | -1.266841 | 1.349788  |
| 9  | -5.976101 | -0.990747 | 2.368710  |
| 53 | -3.928043 | 0.037579  | -0.000060 |
| 53 | 3.975274  | 0.499616  | 0.000032  |
| 6  | 5.147444  | -1.367936 | -0.000497 |
| 6  | 5.989223  | -1.464124 | -1.299413 |
| 6  | 5.987945  | -1.465663 | 1.299131  |
| 9  | 4.293642  | -2.434382 | -0.001550 |
| 9  | 6.663691  | -2.621975 | -1.349503 |
| 9  | 5.185644  | -1.415810 | -2.370527 |
| 9  | 6.873402  | -0.460458 | -1.383453 |
| 9  | 6.872042  | -0.462098 | 1.385226  |
| 9  | 5.183315  | -1.418615 | 2.369510  |
| 9  | 6.662363  | -2.623573 | 1.348512  |

pyNR2-iC3F7I\_trm2

|   |           |           |           |
|---|-----------|-----------|-----------|
| 6 | 0.818807  | -1.524899 | 1.140702  |
| 6 | -0.424941 | -2.132322 | 1.197206  |
| 6 | -1.095105 | -2.448975 | 0.000544  |
| 6 | -0.424921 | -2.132954 | -1.196274 |
| 6 | 0.818826  | -1.525501 | -1.140070 |
| 7 | 1.444543  | -1.218205 | 0.000240  |
| 1 | 1.342584  | -1.274001 | 2.057303  |
| 1 | -0.853935 | -2.346286 | 2.164043  |
| 1 | -0.853899 | -2.347429 | -2.163005 |
| 1 | 1.342618  | -1.275088 | -2.056795 |
| 7 | -2.372890 | -3.002540 | 0.000679  |
| 6 | -2.848939 | -3.634325 | -1.231515 |
| 1 | -2.842145 | -2.922564 | -2.055864 |
| 1 | -2.243366 | -4.506636 | -1.507004 |
| 1 | -3.879549 | -3.950576 | -1.081737 |

|    |           |           |           |
|----|-----------|-----------|-----------|
| 6  | -2.848961 | -3.633675 | 1.233198  |
| 1  | -2.243393 | -4.505840 | 1.509158  |
| 1  | -2.842182 | -2.921480 | 2.057172  |
| 1  | -3.879568 | -3.950005 | 1.083569  |
| 6  | 5.941811  | 0.941783  | -0.000312 |
| 6  | 6.715669  | 0.596488  | -1.293169 |
| 6  | 6.715467  | 0.597576  | 1.292955  |
| 9  | 5.768707  | 2.305216  | -0.000900 |
| 9  | 6.006104  | 0.969287  | -2.369358 |
| 9  | 6.960801  | -0.719504 | -1.382594 |
| 9  | 7.894649  | 1.240859  | -1.350368 |
| 9  | 6.960584  | -0.718341 | 1.383526  |
| 9  | 7.894439  | 1.241994  | 1.349796  |
| 9  | 6.005735  | 0.971282  | 2.368719  |
| 53 | 3.954721  | -0.051128 | -0.000049 |
| 53 | -3.929331 | -0.458224 | -0.000004 |
| 6  | -5.177892 | 1.358603  | -0.000489 |
| 6  | -4.932786 | 2.168966  | 1.298844  |
| 6  | -4.932750 | 2.168297  | -1.300233 |
| 9  | -6.496762 | 0.998563  | -0.000415 |
| 9  | -5.727805 | 3.247921  | 1.348059  |
| 9  | -5.211670 | 1.411242  | 2.369124  |
| 9  | -3.661467 | 2.579516  | 1.385208  |
| 9  | -3.661429 | 2.578802  | -1.386773 |
| 9  | -5.211605 | 1.410022  | -2.370131 |
| 9  | -5.727768 | 3.247226  | -1.350026 |

pyNR2-iC3F7I\_trm3

|    |           |           |           |
|----|-----------|-----------|-----------|
| 6  | 0.791167  | 1.747800  | -1.141754 |
| 6  | -0.478905 | 2.298123  | -1.197863 |
| 6  | -1.162564 | 2.583624  | -0.000991 |
| 6  | -0.478421 | 2.298177  | 1.195616  |
| 6  | 0.791634  | 1.747864  | 1.139018  |
| 7  | 1.430464  | 1.469675  | -0.001491 |
| 1  | 1.325739  | 1.521477  | -2.058521 |
| 1  | -0.917371 | 2.492579  | -2.164571 |
| 1  | -0.916495 | 2.492681  | 2.162492  |
| 1  | 1.326584  | 1.521599  | 2.055579  |
| 7  | -2.464110 | 3.078940  | -0.000736 |
| 6  | -2.967455 | 3.689125  | 1.231543  |
| 1  | -2.928090 | 2.978761  | 2.056164  |
| 1  | -2.401605 | 4.587951  | 1.506261  |
| 1  | -4.011329 | 3.958562  | 1.082122  |
| 6  | -2.967908 | 3.689214  | -1.232788 |
| 1  | -2.402152 | 4.588053  | -1.507656 |
| 1  | -2.928864 | 2.978910  | -2.057477 |
| 1  | -4.011724 | 3.958650  | -1.082956 |
| 6  | 6.089836  | -0.312740 | -0.002458 |
| 6  | 6.372619  | -1.118521 | -1.290973 |
| 6  | 6.379588  | -1.101119 | 1.295242  |
| 9  | 6.954958  | 0.755517  | -0.011983 |
| 9  | 6.148698  | -0.354410 | -2.371327 |
| 9  | 5.591725  | -2.205964 | -1.371894 |
| 9  | 7.653503  | -1.524264 | -1.348692 |
| 9  | 5.599088  | -2.187284 | 1.395052  |
| 9  | 7.660745  | -1.506202 | 1.351465  |
| 9  | 6.161567  | -0.322507 | 2.366412  |
| 53 | 3.998811  | 0.436584  | -0.001824 |
| 53 | -3.922965 | 0.477755  | -0.000547 |
| 6  | -4.997960 | -1.447399 | -0.000223 |
| 6  | -5.833124 | -1.587009 | 1.299017  |
| 6  | -5.832947 | -1.587545 | -1.299518 |
| 9  | -4.090676 | -2.468735 | 0.000046  |
| 9  | -6.447404 | -2.777890 | 1.348979  |
| 9  | -5.032594 | -1.497979 | 2.369803  |
| 9  | -6.767489 | -0.629953 | 1.383796  |
| 9  | -6.767273 | -0.630498 | -1.384838 |
| 9  | -5.032268 | -1.499002 | -2.370231 |
| 9  | -6.447259 | -2.778428 | -1.349050 |



pyNR2-iC3F7I\_trm4

|    |           |           |           |
|----|-----------|-----------|-----------|
| 6  | 0.617939  | 1.867111  | -1.141535 |
| 6  | -0.645285 | 2.433070  | -1.196412 |
| 6  | -1.325246 | 2.724602  | 0.001109  |
| 6  | -0.644503 | 2.428551  | 1.197074  |
| 6  | 0.618695  | 1.862827  | 1.139235  |
| 7  | 1.253896  | 1.578940  | -0.001897 |
| 1  | 1.149495  | 1.635780  | -2.058805 |
| 1  | -1.081485 | 2.634721  | -2.162672 |
| 1  | -1.080067 | 2.626562  | 2.164373  |
| 1  | 1.150865  | 1.628070  | 2.055278  |
| 7  | -2.620822 | 3.235142  | 0.002500  |
| 6  | -3.117391 | 3.847772  | 1.236261  |
| 1  | -3.086755 | 3.134599  | 2.058856  |
| 1  | -2.541116 | 4.739064  | 1.513823  |
| 1  | -4.157975 | 4.129942  | 1.087372  |
| 6  | -3.118117 | 3.852667  | -1.228527 |
| 1  | -2.542025 | 4.745077  | -1.502859 |
| 1  | -3.087933 | 3.142791  | -2.053984 |
| 1  | -4.158625 | 4.134208  | -1.077918 |
| 6  | 5.883017  | -0.280449 | -0.008276 |
| 6  | 6.141560  | -1.113972 | -1.284171 |
| 6  | 6.170143  | -1.050158 | 1.301157  |
| 9  | 6.765909  | 0.772612  | -0.044053 |
| 9  | 5.921522  | -0.365756 | -2.376387 |
| 9  | 5.341933  | -2.189351 | -1.339102 |
| 9  | 7.414954  | -1.542269 | -1.344750 |
| 9  | 5.372230  | -2.120886 | 1.426883  |
| 9  | 7.444681  | -1.475980 | 1.354511  |
| 9  | 5.974196  | -0.248795 | 2.359738  |
| 53 | 3.804964  | 0.504147  | -0.004532 |
| 53 | -4.090880 | 0.639865  | -0.002102 |
| 6  | -5.277006 | -1.218318 | -0.004938 |
| 6  | -5.008902 | -2.014704 | -1.308365 |
| 6  | -5.000018 | -2.024346 | 1.290686  |
| 9  | -6.607344 | -0.903358 | 0.000779  |
| 9  | -5.766795 | -3.119973 | -1.359313 |
| 9  | -5.317203 | -1.262713 | -2.374613 |
| 9  | -3.724619 | -2.381262 | -1.400651 |
| 9  | -3.715198 | -2.391746 | 1.371341  |
| 9  | -5.300785 | -1.280218 | 2.364573  |
| 9  | -5.757752 | -3.129855 | 1.338710  |

pyNR2-iC3H7I\_dimlam

|    |           |           |           |
|----|-----------|-----------|-----------|
| 6  | 3.465600  | -1.468016 | -1.152454 |
| 6  | 2.751195  | -0.279564 | -1.203253 |
| 6  | 2.360148  | 0.344715  | -0.002055 |
| 6  | 2.760198  | -0.299006 | 1.185791  |
| 6  | 3.474144  | -1.486448 | 1.110272  |
| 7  | 3.835757  | -2.089110 | -0.027448 |
| 1  | 3.760896  | -1.947899 | -2.081477 |
| 1  | 2.504784  | 0.141570  | -2.166690 |
| 1  | 2.521059  | 0.106325  | 2.157805  |
| 1  | 3.776336  | -1.981416 | 2.029099  |
| 7  | 1.607479  | 1.503447  | 0.010154  |
| 6  | 1.462346  | 2.240352  | 1.257193  |
| 1  | 1.030950  | 1.603980  | 2.031140  |
| 1  | 2.418494  | 2.640305  | 1.621782  |
| 1  | 0.773840  | 3.068059  | 1.096069  |
| 6  | 1.452869  | 2.260372  | -1.223687 |
| 1  | 2.406180  | 2.666430  | -1.588931 |
| 1  | 1.015813  | 1.636380  | -2.004519 |
| 1  | 0.765444  | 3.085156  | -1.044013 |
| 53 | -1.291542 | 0.031823  | 0.012201  |
| 6  | -3.310666 | -0.911352 | 0.013309  |
| 6  | -4.087586 | -0.446369 | 1.232698  |
| 6  | -4.008557 | -0.616937 | -1.303113 |
| 1  | -3.059450 | -1.967561 | 0.092117  |
| 1  | -3.428757 | -0.967119 | -2.157587 |

|   |           |           |           |
|---|-----------|-----------|-----------|
| 1 | -4.187952 | 0.453755  | -1.423545 |
| 1 | -4.979155 | -1.127121 | -1.315005 |
| 1 | -3.563324 | -0.676546 | 2.160657  |
| 1 | -5.059157 | -0.954460 | 1.252570  |
| 1 | -4.269705 | 0.630046  | 1.197388  |

pyNR2-iC3H7I\_dim1py

|    |           |           |           |
|----|-----------|-----------|-----------|
| 6  | 1.612624  | -1.127976 | -0.033257 |
| 6  | 2.996550  | -1.193366 | 0.013228  |
| 6  | 3.745151  | 0.001579  | 0.089717  |
| 6  | 2.998888  | 1.200371  | 0.090658  |
| 6  | 1.614790  | 1.140799  | 0.040176  |
| 7  | 0.908252  | 0.007811  | -0.018845 |
| 1  | 1.033829  | -2.045562 | -0.089155 |
| 1  | 3.476548  | -2.160744 | -0.011116 |
| 1  | 3.480646  | 2.166427  | 0.129019  |
| 1  | 1.037871  | 2.061232  | 0.043833  |
| 7  | 5.116698  | -0.002096 | 0.162670  |
| 6  | 5.846122  | 1.251198  | 0.058080  |
| 1  | 5.700685  | 1.738979  | -0.915053 |
| 1  | 5.538086  | 1.948656  | 0.841287  |
| 1  | 6.908706  | 1.054819  | 0.188735  |
| 6  | 5.843934  | -1.247354 | -0.022047 |
| 1  | 5.533876  | -1.993344 | 0.714222  |
| 1  | 5.698603  | -1.671045 | -1.024766 |
| 1  | 6.906747  | -1.061841 | 0.121975  |
| 6  | -4.391141 | -0.016086 | -0.238242 |
| 6  | -4.935020 | 1.292253  | 0.313366  |
| 6  | -4.928095 | -1.241041 | 0.485030  |
| 53 | -2.167326 | -0.003690 | -0.147403 |
| 1  | -4.582387 | -0.089027 | -1.308094 |
| 1  | -6.021614 | -1.266030 | 0.400615  |
| 1  | -4.531995 | -2.165883 | 0.063577  |
| 1  | -4.671821 | -1.213213 | 1.546867  |
| 1  | -6.028620 | 1.299644  | 0.226881  |
| 1  | -4.543856 | 2.153952  | -0.229179 |
| 1  | -4.678939 | 1.409437  | 1.369155  |

pyNR2-iC3H7I\_dim2am

|    |           |           |           |
|----|-----------|-----------|-----------|
| 6  | -4.053437 | 1.995609  | -0.894354 |
| 6  | -3.624014 | 0.689378  | -1.080673 |
| 6  | -3.405017 | -0.133921 | 0.041738  |
| 6  | -3.671687 | 0.450233  | 1.296022  |
| 6  | -4.098617 | 1.769101  | 1.356643  |
| 7  | -4.294539 | 2.558069  | 0.294747  |
| 1  | -4.216428 | 2.627875  | -1.762835 |
| 1  | -3.461386 | 0.330887  | -2.086323 |
| 1  | -3.547636 | -0.101970 | 2.215788  |
| 1  | -4.298492 | 2.216404  | 2.326462  |
| 7  | -2.931628 | -1.426278 | -0.078841 |
| 6  | -2.976332 | -2.308139 | 1.078530  |
| 1  | -2.428012 | -1.872096 | 1.914759  |
| 1  | -4.003835 | -2.521928 | 1.403503  |
| 1  | -2.486394 | -3.246005 | 0.822653  |
| 6  | -2.925694 | -2.059196 | -1.389756 |
| 1  | -3.938223 | -2.199089 | -1.792608 |
| 1  | -2.345191 | -1.467506 | -2.099008 |
| 1  | -2.443270 | -3.031518 | -1.306383 |
| 53 | 0.221407  | -0.646123 | 0.065780  |
| 6  | 2.393378  | -0.154103 | 0.161681  |
| 6  | 2.928879  | 0.043132  | -1.245883 |
| 6  | 2.595548  | 1.050042  | 1.065099  |
| 1  | 2.807852  | -1.053770 | 0.613046  |
| 1  | 2.206749  | 0.875387  | 2.068702  |
| 1  | 2.105541  | 1.936358  | 0.656417  |
| 1  | 3.668757  | 1.260891  | 1.144383  |
| 1  | 2.773562  | -0.839147 | -1.867581 |
| 1  | 2.451729  | 0.896337  | -1.732934 |
| 1  | 4.006188  | 0.241050  | -1.193773 |

| pyNR2-iC3H7I_trm1 |           |           |           |
|-------------------|-----------|-----------|-----------|
| 6                 | 0.744316  | -1.623810 | 1.135273  |
| 6                 | -0.479744 | -2.271776 | 1.196979  |
| 6                 | -1.145484 | -2.609378 | 0.000793  |
| 6                 | -0.479776 | -2.272766 | -1.195689 |
| 6                 | 0.744285  | -1.624750 | -1.134553 |
| 7                 | 1.366719  | -1.292389 | 0.000214  |
| 1                 | 1.257780  | -1.357741 | 2.054782  |
| 1                 | -0.902367 | -2.500453 | 2.163964  |
| 1                 | -0.902424 | -2.502244 | -2.162474 |
| 1                 | 1.257725  | -1.359442 | -2.054296 |
| 7                 | -2.387720 | -3.209879 | 0.001059  |
| 6                 | -2.912762 | -3.758598 | -1.240943 |
| 1                 | -2.961713 | -2.987376 | -2.011139 |
| 1                 | -2.308915 | -4.595437 | -1.617349 |
| 1                 | -3.928432 | -4.109136 | -1.066625 |
| 6                 | -2.912722 | -3.757577 | 1.243530  |
| 1                 | -2.308850 | -4.594092 | 1.620615  |
| 1                 | -2.961669 | -2.985718 | 2.013087  |
| 1                 | -3.928389 | -4.108280 | 1.069526  |
| 6                 | 6.107267  | 1.072554  | -0.000944 |
| 6                 | 6.861406  | 0.706853  | -1.269660 |
| 6                 | 6.860338  | 0.710269  | 1.269385  |
| 53                | 4.112641  | 0.085319  | -0.000453 |
| 53                | -4.054782 | -0.403932 | -0.000076 |
| 6                 | -5.242219 | 1.482008  | -0.000833 |
| 6                 | -6.069705 | 1.559720  | -1.271929 |
| 6                 | -6.068281 | 1.561629  | 1.271071  |
| 1                 | -4.456248 | 2.235029  | -0.001837 |
| 1                 | -5.445290 | 1.508105  | 2.164313  |
| 1                 | -6.608656 | 2.515673  | 1.286567  |
| 1                 | -6.804060 | 0.755564  | 1.314695  |
| 1                 | -5.447714 | 1.504853  | -2.165787 |
| 1                 | -6.610096 | 2.513740  | -1.288253 |
| 1                 | -6.805532 | 0.753592  | -1.313519 |
| 1                 | 5.846636  | 2.130209  | -0.002476 |
| 1                 | 6.303999  | 0.992779  | 2.164141  |
| 1                 | 7.824736  | 1.232992  | 1.285408  |
| 1                 | 7.057379  | -0.363533 | 1.315698  |
| 1                 | 6.305819  | 0.986953  | -2.165641 |
| 1                 | 7.825816  | 1.229533  | -1.286280 |
| 1                 | 7.058484  | -0.367069 | -1.312918 |

| pyNR2-iC3H7I_trm2 |           |           |           |
|-------------------|-----------|-----------|-----------|
| 6                 | 0.544929  | 1.771192  | -1.135078 |
| 6                 | -0.663466 | 2.447924  | -1.196035 |
| 6                 | -1.321439 | 2.799152  | 0.000575  |
| 6                 | -0.663480 | 2.446196  | 1.196685  |
| 6                 | 0.544914  | 1.769552  | 1.134765  |
| 7                 | 1.159220  | 1.423587  | -0.000403 |
| 1                 | 1.052031  | 1.494204  | -2.054903 |
| 1                 | -1.080630 | 2.687575  | -2.162735 |
| 1                 | -1.080656 | 2.684450  | 2.163725  |
| 1                 | 1.052005  | 1.491234  | 2.054194  |
| 7                 | -2.550040 | 3.426566  | 0.001021  |
| 6                 | -3.064902 | 3.982702  | 1.243946  |
| 1                 | -3.130571 | 3.210584  | 2.012036  |
| 1                 | -2.444288 | 4.805861  | 1.623186  |
| 1                 | -4.072945 | 4.354647  | 1.069709  |
| 6                 | -3.064882 | 3.984509  | -1.241103 |
| 1                 | -2.444264 | 4.808221  | -1.619133 |
| 1                 | -3.130534 | 3.213509  | -2.010316 |
| 1                 | -4.072929 | 4.356195  | -1.066343 |
| 6                 | 5.823150  | -1.088059 | -0.002081 |
| 6                 | 6.587166  | -0.750176 | 1.268439  |
| 6                 | 6.588578  | -0.745884 | -1.270601 |
| 53                | 3.860714  | -0.038209 | -0.001396 |
| 53                | -4.259342 | 0.644399  | -0.001049 |

|   |           |           |           |
|---|-----------|-----------|-----------|
| 6 | -5.439229 | -1.247039 | -0.002496 |
| 6 | -5.136644 | -2.026318 | -1.270526 |
| 6 | -5.149417 | -2.020341 | 1.272158  |
| 1 | -6.461930 | -0.874384 | -0.008504 |
| 1 | -4.087399 | -2.326930 | -1.307512 |
| 1 | -5.360293 | -1.447297 | -2.167014 |
| 1 | -5.751070 | -2.934443 | -1.286262 |
| 1 | -4.100611 | -2.320783 | 1.321068  |
| 1 | -5.382027 | -1.437110 | 2.163624  |
| 1 | -5.764009 | -2.928385 | 1.286001  |
| 1 | 5.529263  | -2.136961 | -0.004016 |
| 1 | 6.022113  | -1.015299 | 2.163057  |
| 1 | 7.534586  | -1.303073 | 1.284352  |
| 1 | 6.817994  | 0.316854  | 1.315153  |
| 1 | 7.536016  | -1.298727 | -1.287329 |
| 1 | 6.819455  | 0.321297  | -1.313451 |
| 1 | 6.024521  | -1.007981 | -2.166738 |

pyNR2-iC3H7I\_trm3

|    |           |           |           |
|----|-----------|-----------|-----------|
| 6  | 0.710543  | 1.922790  | -1.071918 |
| 6  | -0.542969 | 2.533210  | -1.015272 |
| 6  | -1.200939 | 2.668242  | 0.237581  |
| 6  | -0.497801 | 2.178764  | 1.371966  |
| 6  | 0.753665  | 1.585228  | 1.202367  |
| 7  | 1.372006  | 1.443943  | 0.007077  |
| 1  | 1.213546  | 1.814113  | -2.030705 |
| 1  | -0.992197 | 2.887553  | -1.930885 |
| 1  | -0.910877 | 2.249326  | 2.367005  |
| 1  | 1.291063  | 1.205589  | 2.069065  |
| 7  | -2.469664 | 3.222506  | 0.343694  |
| 6  | -2.989461 | 3.565626  | 1.660180  |
| 1  | -2.998808 | 2.689436  | 2.309975  |
| 1  | -2.406495 | 4.359486  | 2.146627  |
| 1  | -4.019243 | 3.901765  | 1.553130  |
| 6  | -3.036391 | 3.927895  | -0.797491 |
| 1  | -2.466204 | 4.830155  | -1.057274 |
| 1  | -3.077070 | 3.275541  | -1.670935 |
| 1  | -4.058678 | 4.215561  | -0.558620 |
| 6  | 6.172486  | -0.738080 | -0.503205 |
| 6  | 6.149463  | -2.167252 | 0.015548  |
| 6  | 7.208350  | 0.134082  | 0.188511  |
| 53 | 4.154095  | 0.174157  | -0.286387 |
| 53 | -4.044766 | 0.389920  | -0.041696 |
| 6  | -5.169957 | -1.516321 | -0.300664 |
| 6  | -6.239794 | -1.624599 | 0.771762  |
| 6  | -5.714622 | -1.593975 | -1.716214 |
| 1  | -4.386390 | -2.255561 | -0.144647 |
| 1  | -4.922216 | -1.517465 | -2.461229 |
| 1  | -6.441903 | -0.800781 | -1.903126 |
| 1  | -6.220709 | -2.557296 | -1.851523 |
| 1  | -5.816600 | -1.570271 | 1.775183  |
| 1  | -6.984051 | -0.831954 | 0.667888  |
| 1  | -6.753169 | -2.587969 | 0.667802  |
| 1  | 6.321357  | -0.725517 | -1.582230 |
| 1  | 7.019608  | 0.189525  | 1.263389  |
| 1  | 7.212223  | 1.150003  | -0.208590 |
| 1  | 8.206727  | -0.296258 | 0.041511  |
| 1  | 5.923531  | -2.192918 | 1.084365  |
| 1  | 5.406491  | -2.774236 | -0.503466 |
| 1  | 7.134219  | -2.627163 | -0.133753 |

pyNR2-iC3H7I\_trm4

|   |           |          |           |
|---|-----------|----------|-----------|
| 6 | 0.527523  | 1.997381 | -1.074664 |
| 6 | -0.709019 | 2.624094 | -1.079773 |
| 6 | -1.376267 | 2.849146 | 0.141801  |
| 6 | -0.698776 | 2.429433 | 1.304977  |
| 6 | 0.537338  | 1.812806 | 1.187662  |
| 7 | 1.160986  | 1.586158 | 0.027755  |
| 1 | 1.042080  | 1.817356 | -2.014222 |

|    |           |           |           |
|----|-----------|-----------|-----------|
| 1  | -1.140226 | 2.922705  | -2.023627 |
| 1  | -1.121712 | 2.570684  | 2.288412  |
| 1  | 1.059695  | 1.483317  | 2.081265  |
| 7  | -2.630606 | 3.421045  | 0.193740  |
| 6  | -3.163429 | 3.853153  | 1.477732  |
| 1  | -3.192493 | 3.019927  | 2.181523  |
| 1  | -2.577117 | 4.669360  | 1.921151  |
| 1  | -4.187293 | 4.193943  | 1.334835  |
| 6  | -3.174210 | 4.053903  | -0.999253 |
| 1  | -2.590397 | 4.930459  | -1.311303 |
| 1  | -3.211130 | 3.344500  | -1.827436 |
| 1  | -4.196046 | 4.367861  | -0.794004 |
| 6  | 5.909334  | -0.742574 | -0.275872 |
| 6  | 5.815794  | -2.174357 | 0.227557  |
| 6  | 6.938744  | 0.089800  | 0.472221  |
| 53 | 3.913387  | 0.233359  | -0.145708 |
| 53 | -4.216234 | 0.575711  | -0.027217 |
| 6  | -5.307870 | -1.362340 | -0.174814 |
| 6  | -5.665070 | -1.630784 | -1.626359 |
| 6  | -4.469721 | -2.458378 | 0.460003  |
| 1  | -6.200453 | -1.162506 | 0.415283  |
| 1  | -3.531523 | -2.600735 | -0.080470 |
| 1  | -4.235237 | -2.239287 | 1.502041  |
| 1  | -5.029116 | -3.400882 | 0.424591  |
| 1  | -4.767692 | -1.747399 | -2.237835 |
| 1  | -6.269830 | -0.829234 | -2.051562 |
| 1  | -6.239607 | -2.562887 | -1.685860 |
| 1  | 6.109558  | -0.726170 | -1.346510 |
| 1  | 7.928622  | -0.371643 | 0.368372  |
| 1  | 6.994129  | 1.108199  | 0.085452  |
| 1  | 6.701123  | 0.142728  | 1.537494  |
| 1  | 6.791262  | -2.664876 | 0.120625  |
| 1  | 5.079254  | -2.752682 | -0.331791 |
| 1  | 5.538530  | -2.201204 | 1.284192  |

pyNR2-nC3F7I\_d\_1\_dimam

|    |           |           |           |
|----|-----------|-----------|-----------|
| 6  | 4.132975  | -1.175251 | -0.192534 |
| 6  | 3.692763  | 0.018603  | -0.788249 |
| 6  | 3.987903  | 1.205428  | -0.096615 |
| 6  | 4.665877  | 1.136293  | 1.113869  |
| 6  | 4.803684  | -1.121610 | 1.022836  |
| 1  | 3.961931  | -2.137814 | -0.650689 |
| 1  | 3.698656  | 2.173686  | -0.476747 |
| 1  | 4.890610  | 2.054139  | 1.649282  |
| 1  | 5.141067  | -2.045355 | 1.483833  |
| 53 | 0.235181  | -0.170607 | -0.829610 |
| 7  | 2.956109  | 0.021953  | -1.979401 |
| 6  | -1.817251 | -0.346271 | -0.060888 |
| 6  | -2.091510 | 0.397546  | 1.280856  |
| 6  | -1.403119 | -0.161404 | 2.563608  |
| 9  | -2.665103 | 0.180825  | -0.973173 |
| 9  | -2.139823 | -1.649432 | 0.092297  |
| 9  | -1.725714 | 1.691803  | 1.142127  |
| 9  | -3.427085 | 0.356064  | 1.509733  |
| 9  | -1.775870 | 0.587213  | 3.608799  |
| 9  | -1.772575 | -1.425434 | 2.791823  |
| 9  | -0.070895 | -0.113368 | 2.463523  |
| 7  | 5.079017  | 0.003302  | 1.688692  |
| 6  | 3.024231  | -1.172776 | -2.821303 |
| 1  | 2.679947  | -2.048682 | -2.273104 |
| 1  | 2.357382  | -1.035829 | -3.671065 |
| 1  | 4.040664  | -1.361020 | -3.190595 |
| 6  | 2.883230  | 1.277688  | -2.727084 |
| 1  | 2.441727  | 2.063515  | -2.115761 |
| 1  | 3.870102  | 1.609415  | -3.074822 |
| 1  | 2.234102  | 1.130305  | -3.588736 |

pyNR2-nC3F7I\_d\_1\_dimpy

|   |           |          |           |
|---|-----------|----------|-----------|
| 6 | -3.095920 | 1.156276 | -0.444426 |
|---|-----------|----------|-----------|

|    |           |           |           |
|----|-----------|-----------|-----------|
| 6  | -4.470249 | 1.143560  | -0.288271 |
| 6  | -5.119507 | -0.062309 | 0.064565  |
| 6  | -4.286043 | -1.193482 | 0.225618  |
| 6  | -2.920784 | -1.064508 | 0.044480  |
| 7  | -2.313687 | 0.082083  | -0.284322 |
| 1  | -2.590494 | 2.078426  | -0.713843 |
| 1  | -5.022636 | 2.058949  | -0.440484 |
| 1  | -4.690109 | -2.160168 | 0.487302  |
| 1  | -2.274670 | -1.927993 | 0.168192  |
| 7  | -6.472245 | -0.130328 | 0.240142  |
| 6  | -7.104836 | -1.404904 | 0.543765  |
| 1  | -6.956698 | -2.135061 | -0.260437 |
| 1  | -6.713973 | -1.830846 | 1.473135  |
| 1  | -8.174060 | -1.249652 | 0.669622  |
| 6  | -7.298049 | 1.044052  | 0.003907  |
| 1  | -7.006647 | 1.872462  | 0.657174  |
| 1  | -7.233801 | 1.384686  | -1.036112 |
| 1  | -8.335666 | 0.797389  | 0.217658  |
| 6  | 2.618164  | 0.293659  | -0.944213 |
| 6  | 3.429490  | 1.239268  | -0.012657 |
| 53 | 0.434756  | 0.237045  | -0.616276 |
| 6  | 3.228568  | 2.773188  | -0.200825 |
| 9  | 2.890953  | 0.634485  | -2.230207 |
| 9  | 3.120869  | -0.952325 | -0.743984 |
| 9  | 4.752251  | 1.002633  | -0.210616 |
| 9  | 3.139191  | 0.940970  | 1.275167  |
| 9  | 3.574488  | 3.158157  | -1.433410 |
| 9  | 4.006911  | 3.420662  | 0.678185  |
| 9  | 1.959296  | 3.134605  | 0.020303  |

pyNR2-nC3F7I\_d\_2\_dimam

|    |           |           |           |
|----|-----------|-----------|-----------|
| 6  | 3.534506  | -0.418926 | 0.460889  |
| 6  | 3.453173  | 0.077123  | -0.851084 |
| 6  | 3.529142  | 1.472658  | -0.995050 |
| 6  | 3.660389  | 2.266820  | 0.137108  |
| 6  | 3.665700  | 0.472795  | 1.517995  |
| 1  | 3.494276  | -1.476597 | 0.673964  |
| 1  | 3.483971  | 1.949160  | -1.962828 |
| 1  | 3.715715  | 3.345690  | 0.024896  |
| 1  | 3.725654  | 0.088373  | 2.532035  |
| 53 | 0.296080  | -0.780814 | -1.986426 |
| 7  | 3.255986  | -0.768771 | -1.949762 |
| 6  | -1.899345 | -0.871828 | -2.064498 |
| 6  | -2.634435 | 0.447038  | -1.678499 |
| 6  | -2.556570 | 0.901011  | -0.188664 |
| 9  | -2.345970 | -1.866406 | -1.266319 |
| 9  | -2.273214 | -1.164095 | -3.330891 |
| 9  | -3.949579 | 0.285026  | -1.964882 |
| 9  | -2.154688 | 1.451713  | -2.445715 |
| 9  | -3.073343 | -0.027986 | 0.621438  |
| 9  | -3.262846 | 2.029463  | -0.048789 |
| 9  | -1.295491 | 1.143335  | 0.182958  |
| 7  | 3.729559  | 1.800732  | 1.387208  |
| 6  | 3.571565  | -2.187105 | -1.777844 |
| 1  | 2.976926  | -2.617779 | -0.973364 |
| 1  | 3.311066  | -2.713235 | -2.694832 |
| 1  | 4.635117  | -2.350774 | -1.561011 |
| 6  | 3.575429  | -0.241083 | -3.276681 |
| 1  | 2.982255  | 0.647133  | -3.489711 |
| 1  | 4.639506  | 0.009168  | -3.376665 |
| 1  | 3.316107  | -0.993305 | -4.019947 |

pyNR2-nC3F7I\_d\_2\_dimpy

|   |           |           |           |
|---|-----------|-----------|-----------|
| 6 | -2.947616 | 0.860718  | 0.477698  |
| 6 | -4.326197 | 0.972174  | 0.498143  |
| 6 | -5.117421 | -0.082917 | -0.012639 |
| 6 | -4.412848 | -1.196451 | -0.526225 |
| 6 | -3.029951 | -1.200396 | -0.495239 |
| 7 | -2.288722 | -0.199598 | -0.005007 |

|    |           |           |           |
|----|-----------|-----------|-----------|
| 1  | -2.333819 | 1.665927  | 0.869225  |
| 1  | -4.772787 | 1.867338  | 0.904929  |
| 1  | -4.929252 | -2.047763 | -0.944344 |
| 1  | -2.482491 | -2.052435 | -0.885998 |
| 7  | -6.482170 | -0.029861 | -0.009527 |
| 6  | -7.255178 | -1.111672 | -0.600328 |
| 1  | -7.048079 | -1.222831 | -1.671110 |
| 1  | -7.044467 | -2.065720 | -0.107057 |
| 1  | -8.314878 | -0.898296 | -0.479115 |
| 6  | -7.164361 | 1.161637  | 0.472008  |
| 1  | -6.907630 | 1.372134  | 1.514941  |
| 1  | -6.917060 | 2.043907  | -0.129863 |
| 1  | -8.238959 | 1.002365  | 0.416738  |
| 6  | 2.686884  | -0.410347 | -0.054087 |
| 6  | 3.424298  | -0.336187 | 1.313738  |
| 53 | 0.481788  | -0.308835 | 0.018357  |
| 6  | 3.380289  | 1.021855  | 2.076939  |
| 9  | 3.050036  | -1.594220 | -0.612522 |
| 9  | 3.176258  | 0.575442  | -0.849758 |
| 9  | 2.920912  | -1.286629 | 2.135323  |
| 9  | 4.737879  | -0.612847 | 1.106750  |
| 9  | 3.937271  | 1.999800  | 1.355479  |
| 9  | 4.068652  | 0.895821  | 3.220604  |
| 9  | 2.126165  | 1.375419  | 2.381506  |

pyNR2-nC3F7I\_s\_1\_dimam

|    |           |           |           |
|----|-----------|-----------|-----------|
| 6  | 3.927883  | -1.191064 | 0.003314  |
| 6  | 3.576153  | 0.001625  | -0.650950 |
| 6  | 3.912845  | 1.195910  | 0.008297  |
| 6  | 4.543797  | 1.135737  | 1.244409  |
| 6  | 4.558058  | -1.128108 | 1.239683  |
| 1  | 3.719185  | -2.159538 | -0.425859 |
| 1  | 3.691951  | 2.163461  | -0.416835 |
| 1  | 4.801063  | 2.059596  | 1.754255  |
| 1  | 4.826958  | -2.050773 | 1.745675  |
| 53 | 0.097763  | -0.019877 | -0.850062 |
| 7  | 2.885601  | -0.000182 | -1.869009 |
| 6  | -2.012751 | -0.034505 | -0.221901 |
| 6  | -2.152414 | -0.038363 | 1.325038  |
| 6  | -3.613518 | -0.048708 | 1.876222  |
| 9  | -2.626516 | -1.128846 | -0.721860 |
| 9  | -2.640399 | 1.053850  | -0.717671 |
| 9  | -1.533244 | -1.135495 | 1.814464  |
| 9  | -1.547231 | 1.064668  | 1.818688  |
| 9  | -3.573418 | -0.051029 | 3.214448  |
| 9  | -4.284423 | 1.035304  | 1.473545  |
| 9  | -4.270602 | -1.139602 | 1.469359  |
| 7  | 4.872996  | 0.004524  | 1.874282  |
| 6  | 2.921691  | -1.226444 | -2.666280 |
| 1  | 2.510875  | -2.062978 | -2.102691 |
| 1  | 2.295479  | -1.086028 | -3.545872 |
| 1  | 3.939918  | -1.480190 | -2.988525 |
| 6  | 2.906228  | 1.229751  | -2.661159 |
| 1  | 2.484925  | 2.058688  | -2.094098 |
| 1  | 3.921170  | 1.497639  | -2.982315 |
| 1  | 2.281811  | 1.085130  | -3.541345 |

pyNR2-nC3F7I\_s\_1\_dimpy

|   |           |           |           |
|---|-----------|-----------|-----------|
| 6 | -2.917546 | 1.169087  | 0.633149  |
| 6 | -4.300692 | 1.148442  | 0.626998  |
| 6 | -4.977755 | 0.046891  | 0.054130  |
| 6 | -4.160481 | -0.979667 | -0.473363 |
| 6 | -2.784308 | -0.853174 | -0.412481 |
| 7 | -2.151356 | 0.195780  | 0.126326  |
| 1 | -2.391053 | 2.012089  | 1.069677  |
| 1 | -4.838325 | 1.977803  | 1.062159  |
| 1 | -4.585191 | -1.864224 | -0.924400 |
| 1 | -2.150671 | -1.636391 | -0.816805 |
| 7 | -6.341329 | -0.021317 | 0.012294  |

|    |           |           |           |
|----|-----------|-----------|-----------|
| 6  | -6.995820 | -1.202370 | -0.529512 |
| 1  | -6.708330 | -1.372667 | -1.571737 |
| 1  | -6.754433 | -2.102860 | 0.047331  |
| 1  | -8.073368 | -1.056998 | -0.498401 |
| 6  | -7.142759 | 1.027853  | 0.623644  |
| 1  | -6.965426 | 1.099502  | 1.703143  |
| 1  | -6.930712 | 2.002693  | 0.173526  |
| 1  | -8.196221 | 0.807647  | 0.465724  |
| 6  | 2.827777  | 0.422281  | 0.322752  |
| 6  | 3.473907  | 1.103154  | -0.911869 |
| 53 | 0.622501  | 0.344445  | 0.192269  |
| 6  | 5.031264  | 1.205161  | -0.910707 |
| 9  | 3.201589  | 1.105296  | 1.434315  |
| 9  | 3.329364  | -0.834051 | 0.431665  |
| 9  | 2.996986  | 2.365968  | -1.014877 |
| 9  | 3.125581  | 0.414176  | -2.023958 |
| 9  | 5.467298  | 1.921465  | 0.131039  |
| 9  | 5.594358  | -0.007018 | -0.865991 |
| 9  | 5.431422  | 1.813961  | -2.037268 |

pyNR2-nC3F7I\_s\_2\_dimam

|    |           |           |           |
|----|-----------|-----------|-----------|
| 6  | 3.724557  | -1.292534 | -0.115914 |
| 6  | 3.541364  | -0.015149 | -0.671969 |
| 6  | 3.984916  | 1.070203  | 0.102387  |
| 6  | 4.550860  | 0.830488  | 1.348213  |
| 6  | 4.303713  | -1.410325 | 1.141162  |
| 1  | 3.424050  | -2.189243 | -0.636786 |
| 1  | 3.896414  | 2.089746  | -0.241704 |
| 1  | 4.891189  | 1.670481  | 1.946770  |
| 1  | 4.442162  | -2.398093 | 1.571039  |
| 53 | 0.084918  | 0.370946  | -1.018569 |
| 7  | 2.909786  | 0.168386  | -1.907926 |
| 6  | -2.011338 | 0.577035  | -0.375751 |
| 6  | -2.962115 | -0.317397 | -1.217424 |
| 6  | -4.475464 | -0.248390 | -0.838600 |
| 9  | -2.122855 | 0.234169  | 0.924888  |
| 9  | -2.397751 | 1.865396  | -0.499136 |
| 9  | -2.576621 | -1.606716 | -1.087285 |
| 9  | -2.859697 | 0.040567  | -2.517492 |
| 9  | -4.671074 | -0.638966 | 0.424274  |
| 9  | -4.949409 | 0.992667  | -0.986653 |
| 9  | -5.162973 | -1.065059 | -1.647646 |
| 7  | 4.719712  | -0.381247 | 1.884741  |
| 6  | 2.846159  | -0.979499 | -2.813190 |
| 1  | 2.320445  | -1.809969 | -2.344081 |
| 1  | 2.279611  | -0.691935 | -3.697395 |
| 1  | 3.843747  | -1.318218 | -3.121447 |
| 6  | 3.101842  | 1.452283  | -2.582732 |
| 1  | 2.750165  | 2.271307  | -1.956817 |
| 1  | 4.153521  | 1.629360  | -2.842840 |
| 1  | 2.505137  | 1.457303  | -3.493445 |

pyNR2-nC3F7I\_s\_2\_dimpy

|   |           |           |           |
|---|-----------|-----------|-----------|
| 6 | -2.847063 | 1.146244  | -0.036017 |
| 6 | -4.227808 | 1.202438  | 0.026794  |
| 6 | -4.971989 | 0.000654  | 0.070565  |
| 6 | -4.221330 | -1.197391 | 0.035864  |
| 6 | -2.840908 | -1.134222 | -0.027398 |
| 7 | -2.143892 | 0.007785  | -0.062543 |
| 1 | -2.269195 | 2.064630  | -0.068243 |
| 1 | -4.712115 | 2.167581  | 0.040912  |
| 1 | -4.700421 | -2.165001 | 0.057285  |
| 1 | -2.258089 | -2.049691 | -0.052695 |
| 7 | -6.336001 | -0.002755 | 0.142656  |
| 6 | -7.063917 | -1.262317 | 0.121717  |
| 1 | -6.897873 | -1.813566 | -0.811263 |
| 1 | -6.771170 | -1.904029 | 0.958610  |
| 1 | -8.128645 | -1.058716 | 0.211792  |
| 6 | -7.070706 | 1.252664  | 0.112196  |



|    |           |           |           |
|----|-----------|-----------|-----------|
| 1  | -6.781464 | 1.902255  | 0.944215  |
| 1  | -6.907600 | 1.797732  | -0.824924 |
| 1  | -8.134323 | 1.044004  | 0.203803  |
| 6  | 2.834459  | 0.020062  | -0.374837 |
| 6  | 3.549275  | 0.027094  | 1.001517  |
| 53 | 0.631904  | 0.014813  | -0.187627 |
| 6  | 5.109678  | 0.031192  | 0.971616  |
| 9  | 3.242671  | -1.074876 | -1.064976 |
| 9  | 3.236769  | 1.112039  | -1.073086 |
| 9  | 3.171961  | -1.071845 | 1.696306  |
| 9  | 3.166025  | 1.129103  | 1.688145  |
| 9  | 5.583519  | -1.057167 | 0.355663  |
| 9  | 5.577652  | 1.117495  | 0.347598  |
| 9  | 5.572130  | 0.037111  | 2.230984  |

pyNR2-nC3F7I\_s\_trm1

|    |            |           |           |
|----|------------|-----------|-----------|
| 6  | -2.942307  | 1.137925  | -0.098092 |
| 6  | -4.322045  | 1.194210  | 0.014556  |
| 6  | -5.061952  | -0.002904 | 0.060997  |
| 6  | -4.320845  | -1.199039 | 0.008828  |
| 6  | -2.941164  | -1.140832 | -0.103544 |
| 7  | -2.245500  | -0.000965 | -0.158969 |
| 1  | -2.364382  | 2.055709  | -0.137496 |
| 1  | -4.799967  | 2.160757  | 0.060994  |
| 1  | -4.797797  | -2.166277 | 0.050634  |
| 1  | -2.362318  | -2.057837 | -0.147343 |
| 7  | -6.451420  | -0.003725 | 0.112140  |
| 6  | -7.128196  | -1.238341 | 0.509678  |
| 1  | -6.861189  | -2.055635 | -0.159239 |
| 1  | -6.887256  | -1.527674 | 1.540341  |
| 1  | -8.202722  | -1.086212 | 0.426303  |
| 6  | -7.129437  | 1.228318  | 0.515503  |
| 1  | -6.888796  | 1.513017  | 1.547525  |
| 1  | -6.863243  | 2.049032  | -0.149540 |
| 1  | -8.203809  | 1.075507  | 0.431395  |
| 6  | 2.760307   | 0.002433  | -0.525714 |
| 6  | 3.482655   | -0.000678 | 0.847362  |
| 53 | 0.562514   | 0.000828  | -0.321167 |
| 6  | 5.042989   | 0.000198  | 0.806492  |
| 9  | 3.158731   | -1.088672 | -1.224770 |
| 9  | 3.157647   | 1.097451  | -1.219247 |
| 9  | 3.106513   | -1.102965 | 1.536804  |
| 9  | 3.105424   | 1.097739  | 1.542363  |
| 9  | 5.509139   | -1.085373 | 0.180302  |
| 9  | 5.508061   | 1.089376  | 0.185787  |
| 9  | 5.513179   | -0.002737 | 2.062515  |
| 6  | -7.365631  | 0.008192  | -5.034874 |
| 6  | -8.888248  | 0.002821  | -5.344813 |
| 6  | -9.272320  | 0.005969  | -6.858701 |
| 9  | -6.806342  | 1.103192  | -5.587759 |
| 9  | -6.797249  | -1.078605 | -5.594615 |
| 9  | -9.449516  | 1.098519  | -4.786658 |
| 9  | -9.440351  | -1.100992 | -4.793553 |
| 9  | -8.800422  | 1.097409  | -7.468206 |
| 9  | -8.791346  | -1.077645 | -7.475034 |
| 9  | -10.606753 | 0.000740  | -6.966447 |
| 53 | -6.981848  | 0.002993  | -2.867829 |

pyNR2-nC3F7I\_s\_trm2

|   |           |           |           |
|---|-----------|-----------|-----------|
| 6 | -2.940358 | 1.138581  | -0.039906 |
| 6 | -4.320409 | 1.195617  | 0.068501  |
| 6 | -5.060852 | -0.001090 | 0.114591  |
| 6 | -4.320209 | -1.197607 | 0.066801  |
| 6 | -2.940167 | -1.140185 | -0.041524 |
| 7 | -2.243936 | -0.000704 | -0.096919 |
| 1 | -2.361932 | 2.056036  | -0.079364 |
| 1 | -4.798069 | 2.162450  | 0.111534  |
| 1 | -4.797705 | -2.164580 | 0.108463  |
| 1 | -2.361586 | -2.057485 | -0.082282 |

|    |           |           |           |
|----|-----------|-----------|-----------|
| 7  | -6.450703 | -0.001238 | 0.159268  |
| 6  | -7.129810 | -1.235137 | 0.554719  |
| 1  | -6.860315 | -2.052985 | -0.112584 |
| 1  | -6.893468 | -1.524190 | 1.586534  |
| 1  | -8.203934 | -1.082562 | 0.466824  |
| 6  | -7.130014 | 1.231981  | 0.556491  |
| 1  | -6.893706 | 1.519597  | 1.588714  |
| 1  | -6.860665 | 2.050828  | -0.109645 |
| 1  | -8.204112 | 1.079350  | 0.468392  |
| 6  | 2.762513  | -0.000088 | -0.452959 |
| 6  | 3.481559  | -0.000476 | 0.921857  |
| 53 | 0.564263  | -0.000370 | -0.253627 |
| 6  | 5.041987  | -0.000306 | 0.884785  |
| 9  | 3.162248  | -1.092889 | -1.148617 |
| 9  | 3.162036  | 1.093253  | -1.147889 |
| 9  | 3.103358  | -1.101103 | 1.612842  |
| 9  | 3.103136  | 1.099613  | 1.613579  |
| 9  | 5.509270  | -1.087426 | 0.262140  |
| 9  | 5.509051  | 1.087328  | 0.262874  |
| 9  | 5.509116  | -0.000683 | 2.141985  |
| 6  | -7.399673 | 0.002373  | -4.979074 |
| 6  | -6.108119 | 0.002683  | -5.843219 |
| 6  | -6.328020 | 0.003750  | -7.389597 |
| 9  | -8.133959 | -1.088090 | -5.280172 |
| 9  | -8.133518 | 1.093530  | -5.278728 |
| 9  | -5.384469 | -1.097598 | -5.541494 |
| 9  | -5.384023 | 1.102269  | -5.540039 |
| 9  | -7.003096 | -1.083398 | -7.775829 |
| 9  | -7.002653 | 1.091683  | -7.774391 |
| 9  | -5.136018 | 0.003910  | -7.997085 |
| 53 | -6.931192 | 0.000855  | -2.829099 |

pyNR2-nC3H7I\_d\_1\_dimam

|    |           |           |           |
|----|-----------|-----------|-----------|
| 6  | 4.040150  | -1.109074 | -0.090336 |
| 6  | 3.699490  | 0.057231  | -0.803771 |
| 6  | 3.982206  | 1.278346  | -0.160221 |
| 6  | 4.539337  | 1.265875  | 1.110581  |
| 6  | 4.594167  | -0.995402 | 1.176730  |
| 1  | 3.875379  | -2.093534 | -0.502577 |
| 1  | 3.770882  | 2.227928  | -0.629172 |
| 1  | 4.750773  | 2.210096  | 1.604856  |
| 1  | 4.850300  | -1.897752 | 1.725104  |
| 53 | 0.079821  | -0.051429 | -0.863051 |
| 7  | 3.096215  | 0.006116  | -2.045969 |
| 6  | -1.961332 | -0.080023 | -0.024209 |
| 6  | -2.017434 | 0.410311  | 1.413064  |
| 1  | -2.281021 | -1.115647 | -0.122961 |
| 1  | -1.636456 | 1.434158  | 1.466315  |
| 1  | -3.081567 | 0.461103  | 1.681295  |
| 1  | -2.535742 | 0.547252  | -0.700822 |
| 6  | -1.284063 | -0.479354 | 2.415469  |
| 1  | -0.213230 | -0.510245 | 2.204250  |
| 1  | -1.416418 | -0.107182 | 3.433808  |
| 1  | -1.663451 | -1.505049 | 2.379900  |
| 7  | 4.850218  | 0.161273  | 1.797309  |
| 6  | 3.070701  | -1.257027 | -2.769537 |
| 1  | 2.580430  | -2.029667 | -2.175546 |
| 1  | 2.487249  | -1.127197 | -3.679403 |
| 1  | 4.076669  | -1.605681 | -3.040444 |
| 6  | 3.005389  | 1.223058  | -2.839937 |
| 1  | 2.475713  | 2.001764  | -2.289256 |
| 1  | 3.991908  | 1.607507  | -3.133120 |
| 1  | 2.429580  | 1.011717  | -3.739334 |

pyNR2-nC3H7I\_d\_1\_dimpy

|   |           |           |           |
|---|-----------|-----------|-----------|
| 6 | -3.156518 | 0.977664  | 1.064862  |
| 6 | -4.540239 | 0.897813  | 1.043050  |
| 6 | -5.166619 | -0.064034 | 0.220413  |
| 6 | -4.304784 | -0.874077 | -0.551145 |

|    |           |           |           |
|----|-----------|-----------|-----------|
| 6  | -2.933358 | -0.701709 | -0.446354 |
| 7  | -2.342747 | 0.200886  | 0.343043  |
| 1  | -2.671651 | 1.714388  | 1.699013  |
| 1  | -5.113939 | 1.575918  | 1.657742  |
| 1  | -4.688320 | -1.626988 | -1.224069 |
| 1  | -2.267659 | -1.325403 | -1.036162 |
| 7  | -6.531827 | -0.205721 | 0.176241  |
| 6  | -7.132741 | -1.085083 | -0.813402 |
| 1  | -6.935127 | -0.753243 | -1.841418 |
| 1  | -6.760567 | -2.107098 | -0.704875 |
| 1  | -8.210151 | -1.106963 | -0.660472 |
| 6  | -7.378574 | 0.764747  | 0.850758  |
| 1  | -7.148114 | 0.808764  | 1.918354  |
| 1  | -7.271010 | 1.774493  | 0.432630  |
| 1  | -8.418327 | 0.459499  | 0.748697  |
| 6  | 2.901261  | 0.716714  | 0.541744  |
| 6  | 3.429753  | 1.865900  | -0.303904 |
| 53 | 0.706171  | 0.493961  | 0.448431  |
| 1  | 3.296894  | -0.244864 | 0.217707  |
| 1  | 2.960242  | 2.800915  | 0.016163  |
| 1  | 4.500751  | 1.963961  | -0.079467 |
| 1  | 3.115381  | 0.855763  | 1.598868  |
| 6  | 3.246184  | 1.675378  | -1.809018 |
| 1  | 3.686753  | 2.506639  | -2.364989 |
| 1  | 3.726243  | 0.751939  | -2.147447 |
| 1  | 2.187250  | 1.615729  | -2.068977 |

pyNR2-nC3H7I\_d\_2\_dimam

|    |           |           |           |
|----|-----------|-----------|-----------|
| 6  | 3.449825  | -0.461527 | 0.375309  |
| 6  | 3.473588  | 0.078803  | -0.925761 |
| 6  | 3.556290  | 1.482890  | -1.008860 |
| 6  | 3.583343  | 2.234119  | 0.157506  |
| 6  | 3.482472  | 0.392407  | 1.468490  |
| 1  | 3.400628  | -1.526864 | 0.545278  |
| 1  | 3.593733  | 1.992732  | -1.960143 |
| 1  | 3.641956  | 3.316861  | 0.088209  |
| 1  | 3.458611  | -0.028773 | 2.469785  |
| 53 | 0.151897  | -0.649818 | -2.171885 |
| 7  | 3.389491  | -0.718147 | -2.051554 |
| 6  | -2.053049 | -0.574770 | -2.229833 |
| 6  | -2.627204 | 0.580469  | -1.426654 |
| 1  | -2.367882 | -1.543908 | -1.847573 |
| 1  | -2.239102 | 1.526135  | -1.815673 |
| 1  | -3.708387 | 0.585466  | -1.621396 |
| 1  | -2.289010 | -0.503756 | -3.288372 |
| 6  | -2.383885 | 0.488604  | 0.078838  |
| 1  | -1.317220 | 0.531307  | 0.308302  |
| 1  | -2.874715 | 1.312236  | 0.602059  |
| 1  | -2.777383 | -0.449040 | 0.482857  |
| 7  | 3.545772  | 1.726209  | 1.394035  |
| 6  | 3.572257  | -2.156240 | -1.916586 |
| 1  | 2.849792  | -2.570395 | -1.211830 |
| 1  | 3.389421  | -2.624224 | -2.882345 |
| 1  | 4.584203  | -2.420795 | -1.580584 |
| 6  | 3.677298  | -0.136056 | -3.354596 |
| 1  | 3.021602  | 0.714083  | -3.548282 |
| 1  | 4.720726  | 0.195749  | -3.444833 |
| 1  | 3.478467  | -0.881756 | -4.122407 |

pyNR2-nC3H7I\_d\_2\_dimpy

|   |           |           |           |
|---|-----------|-----------|-----------|
| 6 | -3.042041 | 1.073837  | 0.173468  |
| 6 | -4.426412 | 1.131800  | 0.214281  |
| 6 | -5.175117 | -0.056000 | 0.063344  |
| 6 | -4.428115 | -1.236238 | -0.144615 |
| 6 | -3.043650 | -1.170696 | -0.166993 |
| 7 | -2.337167 | -0.046845 | -0.010562 |
| 1 | -2.463201 | 1.985383  | 0.292004  |
| 1 | -4.906673 | 2.088230  | 0.360536  |
| 1 | -4.909761 | -2.192354 | -0.288355 |

|    |           |           |           |
|----|-----------|-----------|-----------|
| 1  | -2.466184 | -2.077274 | -0.324002 |
| 7  | -6.547255 | -0.063457 | 0.119101  |
| 6  | -7.274827 | -1.276160 | -0.218235 |
| 1  | -7.117649 | -1.580666 | -1.261578 |
| 1  | -6.975770 | -2.103950 | 0.429926  |
| 1  | -8.338963 | -1.104766 | -0.066827 |
| 6  | -7.273025 | 1.195773  | 0.156663  |
| 1  | -6.972902 | 1.793739  | 1.021040  |
| 1  | -7.115210 | 1.795709  | -0.749518 |
| 1  | -8.337434 | 0.988706  | 0.250698  |
| 6  | 2.932577  | -0.015653 | -0.197653 |
| 6  | 3.589979  | -0.412908 | 1.115768  |
| 53 | 0.725903  | -0.018327 | -0.111823 |
| 1  | 3.202387  | 0.995107  | -0.500513 |
| 1  | 3.243526  | -1.407751 | 1.411381  |
| 1  | 4.667297  | -0.504874 | 0.920948  |
| 1  | 3.173950  | -0.708110 | -1.000734 |
| 6  | 3.367507  | 0.580015  | 2.255930  |
| 1  | 3.901560  | 0.267260  | 3.156576  |
| 1  | 3.725559  | 1.577062  | 1.981284  |
| 1  | 2.306540  | 0.662136  | 2.501038  |

pyNR2-nC3H7I\_s\_1\_dimam

|    |           |           |           |
|----|-----------|-----------|-----------|
| 6  | 3.956896  | -1.193522 | -0.024435 |
| 6  | 3.633640  | 0.000888  | -0.698164 |
| 6  | 3.943559  | 1.195397  | -0.018372 |
| 6  | 4.509953  | 1.132274  | 1.246854  |
| 6  | 4.522586  | -1.130502 | 1.241110  |
| 1  | 3.771153  | -2.161258 | -0.466279 |
| 1  | 3.747011  | 2.163230  | -0.455303 |
| 1  | 4.742899  | 2.056232  | 1.768938  |
| 1  | 4.765847  | -2.054440 | 1.758506  |
| 53 | -0.012867 | -0.019161 | -0.832104 |
| 7  | 3.023244  | 0.000629  | -1.938770 |
| 6  | -2.092297 | -0.032612 | -0.112438 |
| 6  | -2.174628 | -0.036639 | 1.404844  |
| 1  | -2.534685 | -0.922531 | -0.555379 |
| 1  | -1.649327 | -0.911204 | 1.797641  |
| 1  | -1.659245 | 0.841959  | 1.801757  |
| 1  | -2.544737 | 0.854315  | -0.551209 |
| 6  | -3.633733 | -0.046003 | 1.877153  |
| 1  | -3.685696 | -0.048859 | 2.968661  |
| 1  | -4.172878 | 0.835814  | 1.519282  |
| 1  | -4.162875 | -0.932174 | 1.515132  |
| 7  | 4.805725  | 0.000849  | 1.895445  |
| 6  | 2.978128  | -1.237450 | -2.703951 |
| 1  | 2.481863  | -2.023404 | -2.133191 |
| 1  | 2.390620  | -1.070046 | -3.605045 |
| 1  | 3.978268  | -1.588803 | -2.992608 |
| 6  | 2.964269  | 1.242000  | -2.697648 |
| 1  | 2.459258  | 2.019443  | -2.122916 |
| 1  | 3.960411  | 1.605978  | -2.984481 |
| 1  | 2.378650  | 1.072620  | -3.599602 |

pyNR2-nC3H7I\_s\_1\_dimpy

|   |           |           |           |
|---|-----------|-----------|-----------|
| 6 | -3.072471 | 1.225341  | -0.658571 |
| 6 | -4.447469 | 1.200971  | -0.484766 |
| 6 | -5.054734 | 0.059517  | 0.083180  |
| 6 | -4.185786 | -1.002493 | 0.416817  |
| 6 | -2.824420 | -0.863341 | 0.196048  |
| 7 | -2.250934 | 0.223561  | -0.329693 |
| 1 | -2.601993 | 2.103030  | -1.092497 |
| 1 | -5.029308 | 2.058597  | -0.789279 |
| 1 | -4.556280 | -1.924474 | 0.840460  |
| 1 | -2.153042 | -1.677308 | 0.454288  |
| 7 | -6.408642 | -0.012015 | 0.301324  |
| 6 | -7.004710 | -1.269852 | 0.721293  |
| 1 | -6.883519 | -2.060819 | -0.030810 |
| 1 | -6.563485 | -1.617121 | 1.659120  |

|    |           |           |           |
|----|-----------|-----------|-----------|
| 1  | -8.068898 | -1.118201 | 0.892118  |
| 6  | -7.277885 | 1.030378  | -0.219887 |
| 1  | -6.994146 | 2.009190  | 0.175353  |
| 1  | -7.256727 | 1.081756  | -1.316649 |
| 1  | -8.300232 | 0.829707  | 0.095095  |
| 6  | 2.940139  | 0.518407  | -1.115844 |
| 6  | 3.676951  | 1.095519  | 0.082819  |
| 53 | 0.765761  | 0.393015  | -0.791173 |
| 1  | 3.062662  | 1.133257  | -2.006035 |
| 1  | 3.285889  | 2.092351  | 0.305598  |
| 1  | 3.477253  | 0.479731  | 0.964386  |
| 1  | 3.256387  | -0.499251 | -1.339124 |
| 6  | 5.187781  | 1.172077  | -0.168641 |
| 1  | 5.707292  | 1.588053  | 0.698703  |
| 1  | 5.607244  | 0.181084  | -0.365773 |
| 1  | 5.414271  | 1.807268  | -1.030100 |

pyNR2-nC3H7I\_s\_2\_dimam

|    |           |           |           |
|----|-----------|-----------|-----------|
| 6  | 2.893104  | -0.278673 | -1.180510 |
| 6  | 2.470754  | 0.344878  | 0.010163  |
| 6  | 2.869535  | -0.279875 | 1.208295  |
| 6  | 3.613030  | -1.450254 | 1.151944  |
| 6  | 3.635340  | -1.449067 | -1.110754 |
| 1  | 2.650137  | 0.128983  | -2.150576 |
| 1  | 2.607501  | 0.126798  | 2.173792  |
| 1  | 3.914386  | -1.930709 | 2.078703  |
| 1  | 3.955007  | -1.928617 | -2.031810 |
| 53 | -1.167915 | -0.025006 | -0.026478 |
| 7  | 1.688949  | 1.485561  | 0.003041  |
| 6  | -3.155571 | -0.968176 | -0.043685 |
| 6  | -4.281593 | 0.043503  | 0.086785  |
| 1  | -3.133046 | -1.674111 | 0.783944  |
| 1  | -4.159928 | 0.608667  | 1.014813  |
| 1  | -4.220513 | 0.766458  | -0.731175 |
| 1  | -3.194137 | -1.514085 | -0.984071 |
| 6  | -5.649872 | -0.649328 | 0.071727  |
| 1  | -6.455136 | 0.083447  | 0.165893  |
| 1  | -5.805954 | -1.199521 | -0.860545 |
| 1  | -5.744835 | -1.358439 | 0.898969  |
| 7  | 4.004899  | -2.052256 | 0.024082  |
| 6  | 1.543849  | 2.234480  | -1.237342 |
| 1  | 1.138992  | 1.597757  | -2.024971 |
| 1  | 0.833074  | 3.043148  | -1.075973 |
| 1  | 2.495164  | 2.661813  | -1.582988 |
| 6  | 1.518782  | 2.232658  | 1.241307  |
| 1  | 1.098777  | 1.594538  | 2.019818  |
| 1  | 2.462768  | 2.660095  | 1.606408  |
| 1  | 0.810834  | 3.041115  | 1.066962  |

pyNR2-nC3H7I\_s\_2\_dimpy

|   |           |           |           |
|---|-----------|-----------|-----------|
| 6 | -2.924226 | 1.141113  | 0.005016  |
| 6 | -4.307509 | 1.199780  | 0.072151  |
| 6 | -5.051202 | 0.000211  | 0.119118  |
| 6 | -4.301150 | -1.195328 | 0.070569  |
| 6 | -2.918198 | -1.129229 | 0.003518  |
| 7 | -2.216228 | 0.007835  | -0.027622 |
| 1 | -2.349142 | 2.062062  | -0.028325 |
| 1 | -4.790840 | 2.165688  | 0.086329  |
| 1 | -4.779345 | -2.163807 | 0.083471  |
| 1 | -2.338231 | -2.047066 | -0.031035 |
| 7 | -6.421406 | -0.003487 | 0.210223  |
| 6 | -7.148404 | -1.255485 | 0.076808  |
| 1 | -7.014774 | -1.712291 | -0.912861 |
| 1 | -6.827594 | -1.975840 | 0.833752  |
| 1 | -8.209685 | -1.066917 | 0.227808  |
| 6 | -7.155043 | 1.244808  | 0.078460  |
| 1 | -6.838054 | 1.965858  | 0.836351  |
| 1 | -7.023849 | 1.703621  | -0.910607 |
| 1 | -8.215306 | 1.050409  | 0.229215  |

|    |          |           |           |
|----|----------|-----------|-----------|
| 6  | 3.034006 | 0.021571  | -0.322690 |
| 6  | 3.692471 | 0.025937  | 1.048129  |
| 53 | 0.835153 | 0.015832  | -0.204082 |
| 1  | 3.288146 | 0.908217  | -0.901280 |
| 1  | 3.357755 | 0.902331  | 1.610387  |
| 1  | 3.362505 | -0.850133 | 1.613687  |
| 1  | 3.292954 | -0.865859 | -0.897936 |
| 6  | 5.222020 | 0.029876  | 0.937825  |
| 1  | 5.684821 | 0.032997  | 1.928288  |
| 1  | 5.582875 | -0.853765 | 0.403186  |
| 1  | 5.578085 | 0.913439  | 0.399855  |

## B. IR and Raman spectra

ALN\_ic3F7I\_1

| NM# | Symm | Wavenumber | Force Const | IR Intens | Raman Activ |
|-----|------|------------|-------------|-----------|-------------|
| 1   | A    | 1.7331     | 0.0000      | 0.2058    | 0.2578      |
| 2   | A    | 15.7764    | 0.0012      | 0.0133    | 3.8696      |
| 3   | A    | 20.9709    | 0.0011      | 0.0793    | 5.0073      |
| 4   | A    | 40.2705    | 0.0178      | 0.0230    | 0.0161      |
| 5   | A    | 51.7480    | 0.0176      | 0.0603    | 2.4584      |
| 6   | A    | 54.8210    | 0.0097      | 0.6752    | 1.9241      |
| 7   | A    | 78.7183    | 0.0765      | 0.0633    | 0.0925      |
| 8   | A    | 112.8542   | 0.0424      | 12.2681   | 12.4592     |
| 9   | A    | 133.1500   | 0.2078      | 0.0026    | 0.1820      |
| 10  | A    | 142.4731   | 0.2433      | 10.6673   | 7.0847      |
| 11  | A    | 178.1400   | 0.3582      | 3.7015    | 3.7619      |
| 12  | A    | 233.4011   | 0.4165      | 12.6502   | 68.3988     |
| 13  | A    | 254.7346   | 0.6996      | 0.7715    | 0.1129      |
| 14  | A    | 255.2479   | 0.1695      | 1.4541    | 0.2252      |
| 15  | A    | 279.8898   | 0.8675      | 0.7289    | 5.4760      |
| 16  | A    | 298.9389   | 0.9462      | 0.3509    | 0.7464      |
| 17  | A    | 324.9830   | 1.1391      | 0.0797    | 2.2296      |
| 18  | A    | 343.1476   | 1.1889      | 0.0301    | 1.3807      |
| 19  | A    | 353.8823   | 0.1079      | 6.9161    | 0.1134      |
| 20  | A    | 411.8999   | 0.2855      | 0.0564    | 0.1227      |
| 21  | A    | 432.4760   | 0.1946      | 2.9893    | 0.2060      |
| 22  | A    | 462.6668   | 2.2511      | 1.7100    | 2.5025      |
| 23  | A    | 508.6767   | 0.4024      | 22.2186   | 6.7213      |
| 24  | A    | 529.8960   | 2.9697      | 3.2474    | 0.4703      |
| 25  | A    | 532.4554   | 2.9600      | 3.5625    | 20.4290     |
| 26  | A    | 541.2730   | 1.0873      | 1.6205    | 7.7740      |
| 27  | A    | 556.6094   | 3.2794      | 0.2044    | 0.0377      |
| 28  | A    | 606.6569   | 3.8923      | 3.2889    | 1.9507      |
| 29  | A    | 636.6191   | 1.5229      | 0.0958    | 4.3216      |
| 30  | A    | 698.9859   | 0.5899      | 35.1062   | 3.4611      |
| 31  | A    | 701.6432   | 4.7482      | 38.9126   | 0.0942      |
| 32  | A    | 739.2472   | 1.3267      | 39.7526   | 83.5269     |
| 33  | A    | 743.1321   | 0.6455      | 37.7828   | 12.3802     |
| 34  | A    | 792.5969   | 0.7241      | 297.7245  | 101.7696    |
| 35  | A    | 828.1803   | 0.5083      | 0.1750    | 0.2939      |
| 36  | A    | 837.3304   | 1.0516      | 30.2838   | 60.4553     |
| 37  | A    | 882.9553   | 4.7082      | 81.2727   | 110.1575    |
| 38  | A    | 897.0193   | 0.7273      | 15.4377   | 1.5745      |
| 39  | A    | 948.3717   | 7.5400      | 106.2810  | 0.1625      |
| 40  | A    | 968.2634   | 0.7485      | 0.0738    | 0.0263      |
| 41  | A    | 988.1368   | 0.7332      | 0.0948    | 1.0073      |
| 42  | A    | 1017.8601  | 3.6858      | 0.3559    | 39.2597     |
| 43  | A    | 1049.5419  | 1.3815      | 4.2133    | 18.4752     |
| 44  | A    | 1076.1012  | 1.0755      | 2.6073    | 0.0380      |
| 45  | A    | 1095.0104  | 9.4724      | 103.7203  | 15.5954     |
| 46  | A    | 1126.3191  | 9.7750      | 37.9395   | 1.9601      |
| 47  | A    | 1140.6325  | 0.9575      | 5.1126    | 1.3767      |
| 48  | A    | 1158.3211  | 10.3306     | 11.3223   | 0.4011      |
| 49  | A    | 1183.0154  | 0.9127      | 0.6776    | 4.8075      |
| 50  | A    | 1193.4433  | 10.8889     | 342.0536  | 19.6166     |
| 51  | A    | 1201.6216  | 0.9593      | 7.0136    | 7.0283      |
| 52  | A    | 1208.6118  | 11.1521     | 340.3804  | 12.9669     |
| 53  | A    | 1254.9530  | 9.4114      | 451.4969  | 89.5144     |
| 54  | A    | 1264.3173  | 11.5888     | 255.8182  | 0.9239      |
| 55  | A    | 1277.0867  | 3.4396      | 62.6610   | 92.8065     |
| 56  | A    | 1349.4338  | 5.4953      | 1.5614    | 4.2252      |
| 57  | A    | 1370.1871  | 1.4355      | 0.0472    | 0.0907      |
| 58  | A    | 1502.9860  | 3.0421      | 3.4915    | 2.2814      |
| 59  | A    | 1530.8884  | 3.1887      | 58.8123   | 3.2586      |
| 60  | A    | 1637.3211  | 9.1218      | 4.1178    | 4.8513      |
| 61  | A    | 1645.3898  | 4.4237      | 31.7200   | 62.8765     |
| 62  | A    | 1658.1394  | 2.2831      | 98.6806   | 31.9516     |
| 63  | A    | 3158.2027  | 6.3889      | 13.6991   | 16.3071     |
| 64  | A    | 3159.0995  | 6.4002      | 1.9836    | 79.4969     |

|    |   |           |        |         |          |
|----|---|-----------|--------|---------|----------|
| 65 | A | 3173.9015 | 6.4671 | 3.0360  | 122.8597 |
| 66 | A | 3181.0400 | 6.5206 | 19.8473 | 44.7103  |
| 67 | A | 3194.9539 | 6.6016 | 10.4905 | 271.7451 |
| 68 | A | 3534.7133 | 7.7178 | 20.7749 | 177.1918 |
| 69 | A | 3625.4439 | 8.4983 | 19.9842 | 44.0233  |

-----

ALN\_ic3F7I\_2

| NM# | Symm | Wavenumber | Force Const | IR Intens | Raman Activ |
|-----|------|------------|-------------|-----------|-------------|
| 1   | A    | 1.6306     | 0.0000      | 0.1228    | 0.3261      |
| 2   | A    | 17.0517    | 0.0015      | 0.0153    | 4.1574      |
| 3   | A    | 21.0043    | 0.0011      | 0.0694    | 4.9908      |
| 4   | A    | 40.2064    | 0.0177      | 0.0259    | 0.0177      |
| 5   | A    | 49.9028    | 0.0159      | 0.1413    | 2.6251      |
| 6   | A    | 54.7852    | 0.0097      | 0.6792    | 1.8525      |
| 7   | A    | 78.4287    | 0.0755      | 0.0299    | 0.2503      |
| 8   | A    | 113.5791   | 0.0423      | 13.6329   | 14.2385     |
| 9   | A    | 133.1864   | 0.2085      | 0.0052    | 0.1846      |
| 10  | A    | 142.9292   | 0.2615      | 10.0865   | 6.2411      |
| 11  | A    | 178.7001   | 0.3668      | 2.2335    | 4.1186      |
| 12  | A    | 235.4988   | 0.7072      | 13.2158   | 69.9499     |
| 13  | A    | 250.2897   | 0.1475      | 2.3981    | 6.4783      |
| 14  | A    | 254.6542   | 0.6976      | 0.7595    | 0.1128      |
| 15  | A    | 281.0840   | 0.7671      | 2.6179    | 2.5044      |
| 16  | A    | 299.0563   | 0.9471      | 0.3361    | 0.7704      |
| 17  | A    | 325.1891   | 1.1305      | 0.1400    | 2.3639      |
| 18  | A    | 343.1611   | 1.2126      | 0.0251    | 1.2102      |
| 19  | A    | 354.2691   | 0.1089      | 6.8701    | 0.1206      |
| 20  | A    | 411.9220   | 0.2864      | 0.0512    | 0.1164      |
| 21  | A    | 433.6899   | 0.1935      | 3.1013    | 0.2131      |
| 22  | A    | 462.5485   | 2.2537      | 3.1887    | 3.6785      |
| 23  | A    | 508.4010   | 0.4042      | 23.4754   | 10.0226     |
| 24  | A    | 529.8688   | 2.9693      | 3.3629    | 0.4530      |
| 25  | A    | 532.5875   | 2.8045      | 4.1592    | 17.8682     |
| 26  | A    | 541.4244   | 1.0964      | 0.9933    | 5.6604      |
| 27  | A    | 556.6674   | 3.2801      | 0.1977    | 0.0410      |
| 28  | A    | 606.4598   | 3.8758      | 4.3612    | 1.7841      |
| 29  | A    | 636.6247   | 1.5229      | 0.0960    | 4.3759      |
| 30  | A    | 698.7326   | 0.5914      | 34.8210   | 3.8644      |
| 31  | A    | 701.5443   | 4.7450      | 39.3839   | 0.0144      |
| 32  | A    | 739.0240   | 1.3619      | 63.3194   | 86.8081     |
| 33  | A    | 743.6968   | 0.6422      | 19.0785   | 14.8629     |
| 34  | A    | 793.3418   | 0.7346      | 300.1560  | 113.3390    |
| 35  | A    | 828.1875   | 0.5083      | 0.1773    | 0.2998      |
| 36  | A    | 837.6333   | 1.0386      | 33.2197   | 64.2163     |
| 37  | A    | 883.8376   | 4.3477      | 74.2673   | 90.3715     |
| 38  | A    | 896.9197   | 0.7300      | 14.7053   | 1.9452      |
| 39  | A    | 948.5043   | 7.5409      | 105.9850  | 0.1486      |
| 40  | A    | 968.2100   | 0.7484      | 0.0752    | 0.0298      |
| 41  | A    | 987.5330   | 0.7317      | 0.0966    | 1.1145      |
| 42  | A    | 1017.8874  | 3.6846      | 0.3659    | 39.8917     |
| 43  | A    | 1049.5423  | 1.3815      | 4.0801    | 19.0011     |
| 44  | A    | 1076.2048  | 1.0759      | 2.6234    | 0.0259      |
| 45  | A    | 1095.6735  | 9.5064      | 89.7919   | 25.2429     |
| 46  | A    | 1127.2834  | 9.8002      | 37.5110   | 2.0917      |
| 47  | A    | 1140.7181  | 0.9577      | 4.7680    | 1.3869      |
| 48  | A    | 1156.4828  | 10.2621     | 9.5122    | 0.3234      |
| 49  | A    | 1183.0177  | 0.9127      | 0.6997    | 4.8883      |
| 50  | A    | 1193.4901  | 10.8896     | 371.6156  | 24.8806     |
| 51  | A    | 1201.6327  | 0.9594      | 6.7765    | 7.1341      |
| 52  | A    | 1208.4719  | 11.0965     | 240.1777  | 12.5642     |
| 53  | A    | 1255.7309  | 9.7393      | 608.0263  | 72.0877     |
| 54  | A    | 1264.8456  | 11.5987     | 257.3927  | 0.4956      |
| 55  | A    | 1276.6663  | 3.4025      | 14.6181   | 87.8646     |
| 56  | A    | 1349.4190  | 5.4888      | 1.5561    | 4.3573      |
| 57  | A    | 1370.2022  | 1.4356      | 0.0456    | 0.0863      |
| 58  | A    | 1502.9673  | 3.0416      | 3.4828    | 2.3467      |
| 59  | A    | 1530.8750  | 3.1880      | 59.5173   | 3.0912      |
| 60  | A    | 1637.3126  | 9.1200      | 4.1306    | 4.8848      |



|    |   |           |        |         |          |
|----|---|-----------|--------|---------|----------|
| 61 | A | 1645.3544 | 4.4093 | 32.2930 | 64.9686  |
| 62 | A | 1658.0512 | 2.2862 | 99.2735 | 32.4144  |
| 63 | A | 3158.2476 | 6.3891 | 13.9665 | 16.1757  |
| 64 | A | 3159.1430 | 6.4003 | 1.9701  | 80.1162  |
| 65 | A | 3173.9008 | 6.4671 | 3.0625  | 123.1219 |
| 66 | A | 3181.0528 | 6.5207 | 19.8879 | 45.5545  |
| 67 | A | 3194.9353 | 6.6016 | 10.6369 | 275.3034 |
| 68 | A | 3534.3848 | 7.7166 | 20.0962 | 175.5476 |
| 69 | A | 3624.9133 | 8.4955 | 19.8881 | 43.0879  |

-----

ALN\_ic3F7I\_3

-----

| NM# | Symm | Wavenumber | Force Const | IR Intens | Raman Activ |
|-----|------|------------|-------------|-----------|-------------|
| 1   | A    | 5.5182     | 0.0001      | 0.1325    | 0.2539      |
| 2   | A    | 14.0884    | 0.0013      | 0.0163    | 0.1981      |
| 3   | A    | 17.6356    | 0.0020      | 0.0839    | 1.4110      |
| 4   | A    | 28.9256    | 0.0027      | 0.3595    | 4.4485      |
| 5   | A    | 40.5473    | 0.0071      | 0.0226    | 2.2744      |
| 6   | A    | 51.0739    | 0.0079      | 0.2476    | 4.6126      |
| 7   | A    | 52.9878    | 0.0123      | 0.1018    | 1.3544      |
| 8   | A    | 74.9504    | 0.0633      | 0.0243    | 0.1532      |
| 9   | A    | 128.3047   | 0.2180      | 0.1042    | 0.2929      |
| 10  | A    | 143.4940   | 0.2792      | 0.6152    | 0.3132      |
| 11  | A    | 175.5685   | 0.3497      | 0.7184    | 0.5267      |
| 12  | A    | 222.3064   | 0.1056      | 5.9290    | 0.7063      |
| 13  | A    | 250.5705   | 0.8464      | 0.5727    | 10.7644     |
| 14  | A    | 254.7332   | 0.7036      | 0.1909    | 0.0537      |
| 15  | A    | 282.2966   | 0.8842      | 2.8396    | 0.5723      |
| 16  | A    | 287.1472   | 0.0503      | 16.5274   | 0.0980      |
| 17  | A    | 295.7815   | 0.9352      | 0.5394    | 0.4753      |
| 18  | A    | 323.2377   | 1.1282      | 0.0608    | 1.7156      |
| 19  | A    | 343.4962   | 1.2920      | 0.0137    | 1.1805      |
| 20  | A    | 383.5293   | 0.2549      | 0.1671    | 0.6272      |
| 21  | A    | 416.4437   | 0.3001      | 0.2534    | 0.0013      |
| 22  | A    | 463.9360   | 2.2709      | 3.0553    | 1.7688      |
| 23  | A    | 502.2989   | 0.3269      | 77.4626   | 0.6629      |
| 24  | A    | 530.5894   | 2.9750      | 2.8352    | 0.3357      |
| 25  | A    | 534.8536   | 2.9313      | 6.6190    | 2.9493      |
| 26  | A    | 538.1004   | 1.0851      | 7.6317    | 3.3890      |
| 27  | A    | 556.3882   | 3.2874      | 0.0795    | 0.1150      |
| 28  | A    | 587.3530   | 0.2896      | 189.4525  | 7.0595      |
| 29  | A    | 608.6465   | 3.8461      | 3.2671    | 3.8756      |
| 30  | A    | 636.8527   | 1.5187      | 0.2929    | 3.0034      |
| 31  | A    | 697.8123   | 0.5684      | 32.6100   | 0.1295      |
| 32  | A    | 703.6609   | 4.7731      | 35.6057   | 0.0944      |
| 33  | A    | 742.0051   | 5.4294      | 37.9797   | 15.1145     |
| 34  | A    | 759.2395   | 0.6120      | 87.3103   | 2.0452      |
| 35  | A    | 823.8137   | 0.5052      | 0.5284    | 0.5055      |
| 36  | A    | 833.5978   | 1.8120      | 3.2368    | 21.1353     |
| 37  | A    | 879.8935   | 3.2092      | 116.1784  | 8.2763      |
| 38  | A    | 882.2939   | 0.7698      | 39.2443   | 1.1912      |
| 39  | A    | 948.8179   | 7.3745      | 83.8689   | 0.0811      |
| 40  | A    | 966.9843   | 0.7454      | 0.2106    | 0.0367      |
| 41  | A    | 980.6911   | 0.7098      | 0.0263    | 0.2645      |
| 42  | A    | 1013.9365  | 3.6005      | 2.4558    | 27.7992     |
| 43  | A    | 1049.5117  | 1.3790      | 2.6784    | 17.0095     |
| 44  | A    | 1066.4473  | 1.0576      | 2.7590    | 0.0412      |
| 45  | A    | 1123.6020  | 10.0469     | 112.8611  | 3.6389      |
| 46  | A    | 1135.8376  | 0.9741      | 6.8929    | 2.2470      |
| 47  | A    | 1142.1616  | 8.7915      | 40.0131   | 0.5775      |
| 48  | A    | 1161.5057  | 10.2381     | 0.2306    | 0.5076      |
| 49  | A    | 1180.3661  | 0.9055      | 2.2139    | 3.4960      |
| 50  | A    | 1198.9022  | 1.3947      | 109.0146  | 4.4068      |
| 51  | A    | 1203.1132  | 2.4303      | 259.2714  | 9.8266      |
| 52  | A    | 1214.8189  | 10.4388     | 301.7174  | 0.1577      |
| 53  | A    | 1255.9054  | 11.4748     | 235.4289  | 0.6655      |
| 54  | A    | 1264.3584  | 11.8454     | 289.4866  | 10.5406     |
| 55  | A    | 1299.7400  | 3.2452      | 69.0162   | 14.8578     |
| 56  | A    | 1349.4577  | 5.8845      | 6.4273    | 1.4334      |

|    |   |           |        |          |          |
|----|---|-----------|--------|----------|----------|
| 57 | A | 1367.8374 | 1.4245 | 0.0007   | 0.2072   |
| 58 | A | 1501.3260 | 3.0885 | 1.6208   | 1.2635   |
| 59 | A | 1531.6032 | 3.2596 | 60.4839  | 1.2197   |
| 60 | A | 1629.0987 | 8.9333 | 4.4919   | 3.2250   |
| 61 | A | 1645.9306 | 4.3365 | 21.9907  | 14.0062  |
| 62 | A | 1663.2959 | 2.3692 | 142.5308 | 26.2959  |
| 63 | A | 3151.6659 | 6.3587 | 15.9255  | 22.1208  |
| 64 | A | 3152.5014 | 6.3702 | 4.4271   | 89.9895  |
| 65 | A | 3169.1690 | 6.4479 | 2.3974   | 139.5850 |
| 66 | A | 3174.7107 | 6.4940 | 28.2873  | 26.0970  |
| 67 | A | 3192.2860 | 6.5875 | 10.4293  | 211.4574 |
| 68 | A | 3567.6375 | 7.8546 | 17.0075  | 195.9748 |
| 69 | A | 3665.2202 | 8.6976 | 15.1196  | 54.4229  |

-----

ALN\_ic3F7I\_4

| NM# | Symm | Wavenumber | Force Const | IR Intens | Raman Activ |
|-----|------|------------|-------------|-----------|-------------|
| 1   | A    | 2.6502     | 0.0000      | 0.1005    | 0.3140      |
| 2   | A    | 15.0932    | 0.0011      | 0.3900    | 3.4566      |
| 3   | A    | 21.4946    | 0.0027      | 0.0076    | 0.0816      |
| 4   | A    | 37.6063    | 0.0075      | 0.6061    | 8.9246      |
| 5   | A    | 40.0050    | 0.0171      | 0.0371    | 0.4741      |
| 6   | A    | 49.5031    | 0.0051      | 0.2158    | 6.4867      |
| 7   | A    | 75.3508    | 0.0637      | 0.5499    | 1.0832      |
| 8   | A    | 78.7436    | 0.0236      | 6.0771    | 16.9323     |
| 9   | A    | 130.5536   | 0.2334      | 0.0576    | 0.4369      |
| 10  | A    | 142.6951   | 0.2807      | 3.6709    | 6.7937      |
| 11  | A    | 177.5574   | 0.3607      | 1.9498    | 4.7617      |
| 12  | A    | 220.9553   | 0.1037      | 3.8470    | 33.3402     |
| 13  | A    | 244.5127   | 0.7289      | 4.3620    | 55.3525     |
| 14  | A    | 255.1079   | 0.7129      | 0.6849    | 0.0779      |
| 15  | A    | 282.1291   | 0.8818      | 1.3735    | 5.2230      |
| 16  | A    | 298.2815   | 0.9580      | 0.4031    | 0.6339      |
| 17  | A    | 318.7761   | 0.0617      | 14.3279   | 0.1460      |
| 18  | A    | 324.5278   | 1.1352      | 0.0752    | 2.3825      |
| 19  | A    | 342.9830   | 1.2888      | 0.1166    | 1.2331      |
| 20  | A    | 385.0463   | 0.2520      | 0.1505    | 0.6553      |
| 21  | A    | 413.6663   | 0.2988      | 0.2422    | 0.0549      |
| 22  | A    | 462.5105   | 2.2590      | 1.5657    | 2.6266      |
| 23  | A    | 485.1394   | 0.2016      | 218.8401  | 9.5555      |
| 24  | A    | 520.9491   | 0.4268      | 49.5998   | 14.5877     |
| 25  | A    | 529.9324   | 2.9653      | 3.8296    | 0.4710      |
| 26  | A    | 533.5350   | 2.9117      | 4.7932    | 20.0475     |
| 27  | A    | 541.8693   | 0.6980      | 16.7157   | 6.4367      |
| 28  | A    | 556.7558   | 3.2934      | 0.2911    | 0.1029      |
| 29  | A    | 606.7432   | 3.8949      | 3.1282    | 2.0884      |
| 30  | A    | 635.3882   | 1.5101      | 0.3531    | 3.2765      |
| 31  | A    | 699.0251   | 0.6453      | 21.3893   | 1.1489      |
| 32  | A    | 702.2919   | 4.6788      | 41.6432   | 0.1897      |
| 33  | A    | 741.3086   | 5.4604      | 34.4900   | 28.0780     |
| 34  | A    | 766.5316   | 0.5678      | 118.4617  | 12.5659     |
| 35  | A    | 825.7293   | 0.5069      | 0.4576    | 0.2190      |
| 36  | A    | 835.4279   | 1.8801      | 3.9444    | 19.7739     |
| 37  | A    | 879.6806   | 0.7123      | 6.2664    | 43.4545     |
| 38  | A    | 884.1034   | 4.4094      | 110.0395  | 85.0214     |
| 39  | A    | 947.6698   | 7.3793      | 105.5055  | 0.6166      |
| 40  | A    | 967.1883   | 0.7437      | 0.4743    | 0.1650      |
| 41  | A    | 976.9593   | 0.6959      | 2.7744    | 8.5572      |
| 42  | A    | 1012.6564  | 3.5856      | 6.4480    | 38.5528     |
| 43  | A    | 1045.3141  | 1.3776      | 8.4993    | 37.5626     |
| 44  | A    | 1060.6926  | 1.0409      | 1.4421    | 0.0772      |
| 45  | A    | 1097.6897  | 9.5413      | 105.5523  | 12.0933     |
| 46  | A    | 1130.5417  | 9.4119      | 30.8073   | 2.0218      |
| 47  | A    | 1133.5394  | 0.9729      | 3.8950    | 2.6595      |
| 48  | A    | 1161.5709  | 10.4021     | 10.8429   | 0.3853      |
| 49  | A    | 1181.4859  | 0.9030      | 1.7884    | 3.2067      |
| 50  | A    | 1196.6031  | 10.2877     | 338.6072  | 11.5312     |
| 51  | A    | 1202.0896  | 0.9743      | 39.7494   | 28.1605     |
| 52  | A    | 1213.1667  | 10.7336     | 288.6881  | 14.0373     |

|    |   |           |         |          |          |
|----|---|-----------|---------|----------|----------|
| 53 | A | 1257.2415 | 11.3169 | 409.7796 | 139.2389 |
| 54 | A | 1259.6923 | 11.5413 | 264.8488 | 2.3057   |
| 55 | A | 1312.8655 | 3.2204  | 80.4652  | 17.0061  |
| 56 | A | 1353.6202 | 6.0706  | 5.4076   | 2.7716   |
| 57 | A | 1368.3187 | 1.4266  | 0.0949   | 0.3250   |
| 58 | A | 1502.1043 | 3.1181  | 2.4960   | 2.0010   |
| 59 | A | 1530.6366 | 3.2543  | 67.5031  | 15.2125  |
| 60 | A | 1619.6008 | 8.6789  | 4.9811   | 2.4664   |
| 61 | A | 1643.0727 | 4.8913  | 50.3477  | 102.6166 |
| 62 | A | 1664.3298 | 2.2488  | 193.7761 | 60.7350  |
| 63 | A | 3158.5311 | 6.3874  | 13.6676  | 23.3878  |
| 64 | A | 3159.7156 | 6.4002  | 3.2942   | 95.9055  |
| 65 | A | 3173.6685 | 6.4681  | 2.9897   | 128.8982 |
| 66 | A | 3179.8317 | 6.5162  | 18.2824  | 22.1368  |
| 67 | A | 3194.0125 | 6.5952  | 4.3933   | 195.1298 |
| 68 | A | 3580.9084 | 7.9100  | 34.2779  | 259.4281 |
| 69 | A | 3682.7748 | 8.7922  | 20.8066  | 59.6764  |

-----

ALN\_ic3F7I\_5

| NM# | Symm | Wavenumber | Force Const | IR Intens | Raman Activ |
|-----|------|------------|-------------|-----------|-------------|
| 1   | A    | 3.4012     | 0.0000      | 0.0828    | 0.3035      |
| 2   | A    | 20.5569    | 0.0020      | 0.2510    | 2.1532      |
| 3   | A    | 22.0776    | 0.0037      | 0.0655    | 0.4909      |
| 4   | A    | 40.1108    | 0.0174      | 0.0334    | 0.0782      |
| 5   | A    | 44.4923    | 0.0056      | 0.7699    | 5.1549      |
| 6   | A    | 48.7328    | 0.0086      | 0.1911    | 7.9303      |
| 7   | A    | 75.4871    | 0.0619      | 0.2809    | 0.4708      |
| 8   | A    | 79.4651    | 0.0193      | 4.3525    | 12.6774     |
| 9   | A    | 131.2555   | 0.2379      | 0.2612    | 1.0478      |
| 10  | A    | 142.4170   | 0.2786      | 3.6669    | 4.9065      |
| 11  | A    | 177.5396   | 0.3601      | 1.6857    | 3.3540      |
| 12  | A    | 223.2305   | 0.1090      | 26.1771   | 31.1414     |
| 13  | A    | 242.7720   | 0.6998      | 2.5682    | 59.0945     |
| 14  | A    | 255.0189   | 0.7116      | 0.6834    | 0.1063      |
| 15  | A    | 281.5123   | 0.8787      | 1.4757    | 4.6123      |
| 16  | A    | 298.3573   | 0.9526      | 0.4395    | 0.7057      |
| 17  | A    | 307.8538   | 0.0579      | 18.5891   | 0.1853      |
| 18  | A    | 324.4436   | 1.1355      | 0.0770    | 2.3167      |
| 19  | A    | 343.0432   | 1.2885      | 0.1119    | 1.2953      |
| 20  | A    | 385.8950   | 0.2558      | 0.4023    | 0.7793      |
| 21  | A    | 413.6565   | 0.3029      | 3.2263    | 5.2279      |
| 22  | A    | 462.4586   | 2.2660      | 1.8990    | 3.1990      |
| 23  | A    | 503.1834   | 0.3083      | 145.8369  | 4.8846      |
| 24  | A    | 529.9294   | 2.9698      | 3.5721    | 0.4369      |
| 25  | A    | 533.3087   | 2.9539      | 6.2330    | 21.0174     |
| 26  | A    | 537.9879   | 1.0276      | 14.8211   | 3.9707      |
| 27  | A    | 556.7594   | 3.2933      | 0.2864    | 0.0634      |
| 28  | A    | 567.1983   | 0.2910      | 257.8567  | 5.6289      |
| 29  | A    | 606.7477   | 3.8820      | 2.5458    | 2.4279      |
| 30  | A    | 635.6518   | 1.5117      | 0.7046    | 6.5347      |
| 31  | A    | 700.7725   | 0.6581      | 23.9854   | 0.4052      |
| 32  | A    | 702.3343   | 3.5878      | 40.8123   | 0.2294      |
| 33  | A    | 741.1922   | 5.4323      | 33.3107   | 30.5976     |
| 34  | A    | 756.0318   | 0.5720      | 88.6437   | 1.8638      |
| 35  | A    | 829.3888   | 0.5405      | 3.5406    | 10.2959     |
| 36  | A    | 835.6878   | 1.5130      | 7.9790    | 26.1519     |
| 37  | A    | 878.8212   | 0.6586      | 26.4638   | 15.0190     |
| 38  | A    | 883.3168   | 6.1066      | 110.3198  | 112.0206    |
| 39  | A    | 948.1081   | 7.3179      | 104.3919  | 0.4050      |
| 40  | A    | 964.4635   | 0.7329      | 2.0197    | 5.7484      |
| 41  | A    | 979.4251   | 0.7154      | 0.3115    | 1.2332      |
| 42  | A    | 1013.2381  | 3.5460      | 2.4373    | 44.6604     |
| 43  | A    | 1049.0507  | 1.3823      | 2.0180    | 14.9090     |
| 44  | A    | 1063.9066  | 1.0610      | 4.2013    | 4.3380      |
| 45  | A    | 1099.5832  | 9.5769      | 105.0905  | 15.3662     |
| 46  | A    | 1131.8444  | 9.9384      | 31.9892   | 1.8992      |
| 47  | A    | 1135.3504  | 0.9681      | 3.3793    | 2.0228      |
| 48  | A    | 1160.5523  | 10.3808     | 9.9233    | 0.3798      |

|    |   |           |         |          |          |
|----|---|-----------|---------|----------|----------|
| 49 | A | 1182.2488 | 0.9090  | 3.3688   | 11.0672  |
| 50 | A | 1197.4199 | 10.8948 | 334.7880 | 13.1435  |
| 51 | A | 1201.8914 | 0.9631  | 10.9459  | 3.0530   |
| 52 | A | 1212.0871 | 11.1041 | 301.1120 | 16.0748  |
| 53 | A | 1257.0403 | 11.5012 | 446.8373 | 139.6470 |
| 54 | A | 1260.1413 | 11.5239 | 245.0329 | 3.5481   |
| 55 | A | 1310.0248 | 3.2672  | 59.5849  | 53.8877  |
| 56 | A | 1350.8558 | 5.8993  | 10.4746  | 12.0338  |
| 57 | A | 1369.0278 | 1.4282  | 0.1552   | 0.6050   |
| 58 | A | 1498.4566 | 3.0302  | 6.3574   | 21.4022  |
| 59 | A | 1531.5230 | 3.2617  | 68.0984  | 33.9795  |
| 60 | A | 1622.7073 | 8.6269  | 13.4616  | 56.5774  |
| 61 | A | 1643.9806 | 5.4094  | 36.0759  | 16.5599  |
| 62 | A | 1666.9646 | 2.1546  | 126.8920 | 20.4202  |
| 63 | A | 3157.0680 | 6.3859  | 7.6730   | 34.8610  |
| 64 | A | 3159.5880 | 6.3970  | 5.1660   | 70.2029  |
| 65 | A | 3174.4541 | 6.4719  | 2.0565   | 139.8601 |
| 66 | A | 3179.4016 | 6.5136  | 18.9084  | 41.5499  |
| 67 | A | 3196.8962 | 6.6062  | 9.0327   | 221.0204 |
| 68 | A | 3573.4630 | 7.8797  | 23.7245  | 150.0875 |
| 69 | A | 3671.8164 | 8.7342  | 19.0614  | 39.2370  |

-----

ALN\_ic3F7I\_6

-----

| NM# | Symm | Wavenumber | Force Const | IR Intens | Raman Activ |
|-----|------|------------|-------------|-----------|-------------|
| 1   | A    | 2.0906     | 0.0000      | 0.1003    | 0.3294      |
| 2   | A    | 21.0914    | 0.0029      | 0.0525    | 1.1764      |
| 3   | A    | 21.4308    | 0.0024      | 0.2640    | 1.7252      |
| 4   | A    | 40.2168    | 0.0178      | 0.0238    | 0.0275      |
| 5   | A    | 43.9267    | 0.0054      | 0.7870    | 5.0971      |
| 6   | A    | 49.4598    | 0.0091      | 0.1806    | 7.5260      |
| 7   | A    | 76.1946    | 0.0708      | 0.0592    | 0.0923      |
| 8   | A    | 79.1904    | 0.0184      | 4.5432    | 12.8144     |
| 9   | A    | 130.2333   | 0.2320      | 0.1996    | 0.7558      |
| 10  | A    | 142.4549   | 0.2800      | 4.2545    | 6.1691      |
| 11  | A    | 177.3777   | 0.3614      | 2.2324    | 4.9234      |
| 12  | A    | 223.3700   | 0.1076      | 25.1361   | 27.4723     |
| 13  | A    | 243.1185   | 0.7525      | 2.8978    | 60.2614     |
| 14  | A    | 255.1059   | 0.7117      | 0.7089    | 0.1209      |
| 15  | A    | 281.8516   | 0.8782      | 1.3884    | 5.1065      |
| 16  | A    | 298.3619   | 0.9480      | 0.3438    | 0.7418      |
| 17  | A    | 307.1841   | 0.0576      | 18.2240   | 0.1660      |
| 18  | A    | 324.5202   | 1.1345      | 0.0911    | 2.5709      |
| 19  | A    | 343.1289   | 1.2894      | 0.1356    | 1.3112      |
| 20  | A    | 385.9234   | 0.2559      | 0.3976    | 0.7898      |
| 21  | A    | 413.8680   | 0.3028      | 3.2358    | 5.3198      |
| 22  | A    | 462.5907   | 2.2683      | 1.8895    | 2.6343      |
| 23  | A    | 503.0732   | 0.3069      | 147.9060  | 5.4235      |
| 24  | A    | 530.0052   | 2.9712      | 3.4346    | 0.4311      |
| 25  | A    | 533.3419   | 2.9497      | 7.0886    | 21.2298     |
| 26  | A    | 538.0155   | 1.0261      | 14.7561   | 4.0100      |
| 27  | A    | 556.7424   | 3.2929      | 0.3345    | 0.0465      |
| 28  | A    | 566.7168   | 0.2913      | 258.3359  | 5.6585      |
| 29  | A    | 606.8806   | 3.8872      | 2.5779    | 1.9243      |
| 30  | A    | 635.6448   | 1.5117      | 0.7238    | 6.6919      |
| 31  | A    | 700.7001   | 0.6324      | 23.0098   | 0.5148      |
| 32  | A    | 702.2603   | 4.7587      | 41.0538   | 0.0772      |
| 33  | A    | 741.2521   | 5.4105      | 33.7222   | 30.9288     |
| 34  | A    | 756.1753   | 0.5707      | 88.6400   | 1.8802      |
| 35  | A    | 829.4511   | 0.5420      | 3.5649    | 10.0705     |
| 36  | A    | 835.7321   | 1.5038      | 7.7159    | 26.9028     |
| 37  | A    | 879.3873   | 0.6610      | 21.0671   | 20.3461     |
| 38  | A    | 883.4949   | 5.9108      | 113.7373  | 110.7350    |
| 39  | A    | 947.9276   | 7.4772      | 103.8800  | 0.1263      |
| 40  | A    | 965.1760   | 0.7337      | 2.0780    | 5.7002      |
| 41  | A    | 980.5639   | 0.7174      | 0.4105    | 1.3007      |
| 42  | A    | 1013.2432  | 3.5455      | 2.3185    | 44.7740     |
| 43  | A    | 1049.0323  | 1.3820      | 2.0333    | 14.8939     |
| 44  | A    | 1063.8239  | 1.0604      | 3.3868    | 4.3610      |

|    |   |           |         |          |          |
|----|---|-----------|---------|----------|----------|
| 45 | A | 1098.8666 | 9.5624  | 104.0901 | 14.6535  |
| 46 | A | 1131.0140 | 9.7353  | 31.9108  | 2.1122   |
| 47 | A | 1135.2758 | 0.9700  | 4.2700   | 2.0278   |
| 48 | A | 1162.1938 | 10.4115 | 9.1670   | 0.3555   |
| 49 | A | 1182.2344 | 0.9094  | 3.7727   | 11.5754  |
| 50 | A | 1197.4918 | 10.8704 | 311.5393 | 12.2423  |
| 51 | A | 1201.8849 | 0.9625  | 9.8508   | 3.3395   |
| 52 | A | 1211.9847 | 11.1311 | 320.3922 | 21.4366  |
| 53 | A | 1257.4730 | 11.5326 | 464.2202 | 141.9274 |
| 54 | A | 1259.7637 | 11.5220 | 245.3376 | 1.6846   |
| 55 | A | 1310.0436 | 3.2639  | 56.1895  | 55.9478  |
| 56 | A | 1350.8608 | 5.9045  | 9.5695   | 12.4357  |
| 57 | A | 1369.0103 | 1.4282  | 0.1519   | 0.6123   |
| 58 | A | 1498.4625 | 3.0306  | 6.3618   | 21.4366  |
| 59 | A | 1531.5225 | 3.2620  | 68.6256  | 34.9924  |
| 60 | A | 1622.6594 | 8.6271  | 13.6704  | 57.9046  |
| 61 | A | 1643.9630 | 5.4018  | 35.9812  | 16.3311  |
| 62 | A | 1666.9391 | 2.1561  | 128.0791 | 20.9548  |
| 63 | A | 3156.9904 | 6.3857  | 7.6725   | 36.1187  |
| 64 | A | 3159.5732 | 6.3969  | 5.3055   | 69.9620  |
| 65 | A | 3174.4639 | 6.4718  | 2.0953   | 139.2522 |
| 66 | A | 3179.4395 | 6.5137  | 18.8497  | 41.0102  |
| 67 | A | 3196.9012 | 6.6063  | 8.9242   | 219.2756 |
| 68 | A | 3573.6626 | 7.8806  | 24.0421  | 151.9744 |
| 69 | A | 3672.0746 | 8.7355  | 19.1977  | 39.9519  |

-----

ALN\_ic3F7I\_7

| NM# | Symm | Wavenumber | Force Const | IR Intens | Raman Activ |
|-----|------|------------|-------------|-----------|-------------|
| 1   | A    | 13.0389    | 0.0007      | 0.0986    | 0.2689      |
| 2   | A    | 17.5502    | 0.0014      | 0.0563    | 0.4344      |
| 3   | A    | 25.5506    | 0.0055      | 0.0786    | 0.1901      |
| 4   | A    | 40.5694    | 0.0049      | 0.9265    | 4.7423      |
| 5   | A    | 40.6155    | 0.0053      | 0.6115    | 3.3898      |
| 6   | A    | 50.6651    | 0.0098      | 0.2306    | 3.3383      |
| 7   | A    | 54.5652    | 0.0122      | 0.3279    | 1.7983      |
| 8   | A    | 75.3633    | 0.0642      | 0.1311    | 0.0678      |
| 9   | A    | 128.2042   | 0.2175      | 0.1232    | 0.2605      |
| 10  | A    | 144.5553   | 0.2831      | 0.8114    | 0.3400      |
| 11  | A    | 175.4565   | 0.3518      | 1.0425    | 0.5864      |
| 12  | A    | 223.9274   | 0.1064      | 8.2599    | 1.0662      |
| 13  | A    | 250.9174   | 0.8625      | 0.4265    | 11.3509     |
| 14  | A    | 254.7051   | 0.7097      | 0.2796    | 0.0554      |
| 15  | A    | 275.6727   | 0.0468      | 21.5255   | 0.0255      |
| 16  | A    | 282.6028   | 0.8783      | 2.6377    | 0.9443      |
| 17  | A    | 295.3290   | 0.8420      | 0.1086    | 0.4756      |
| 18  | A    | 323.5816   | 1.1303      | 0.0435    | 1.6869      |
| 19  | A    | 343.5251   | 1.2905      | 0.0050    | 1.1445      |
| 20  | A    | 384.1662   | 0.2558      | 0.1365    | 0.6265      |
| 21  | A    | 415.8663   | 0.3010      | 0.1758    | 0.0356      |
| 22  | A    | 463.6183   | 2.2692      | 3.3013    | 1.2889      |
| 23  | A    | 503.4911   | 0.3415      | 85.0519   | 0.6810      |
| 24  | A    | 530.2830   | 2.9703      | 3.0038    | 0.3046      |
| 25  | A    | 535.6221   | 3.0115      | 9.2561    | 3.1257      |
| 26  | A    | 538.4060   | 1.1039      | 5.7338    | 3.4293      |
| 27  | A    | 556.1953   | 3.2873      | 0.0595    | 0.1465      |
| 28  | A    | 608.2556   | 3.7617      | 0.4375    | 2.4864      |
| 29  | A    | 612.4676   | 0.3087      | 329.6139  | 8.5766      |
| 30  | A    | 636.7146   | 1.5177      | 0.1965    | 2.9203      |
| 31  | A    | 697.2072   | 0.5781      | 28.0847   | 0.1719      |
| 32  | A    | 703.5473   | 4.7679      | 35.1974   | 0.1201      |
| 33  | A    | 742.2526   | 5.4798      | 28.6606   | 13.8471     |
| 34  | A    | 756.7495   | 0.6073      | 93.3623   | 2.3093      |
| 35  | A    | 825.0265   | 0.5061      | 1.1468    | 0.4273      |
| 36  | A    | 834.2590   | 1.7996      | 5.6996    | 21.6981     |
| 37  | A    | 878.1898   | 1.9877      | 152.5188  | 5.4724      |
| 38  | A    | 881.8829   | 0.8819      | 9.7799    | 2.0035      |
| 39  | A    | 948.4607   | 7.4146      | 77.6023   | 0.0703      |
| 40  | A    | 966.1685   | 0.7444      | 0.1770    | 0.0416      |

|    |   |           |         |          |          |
|----|---|-----------|---------|----------|----------|
| 41 | A | 981.1787  | 0.7118  | 0.1270   | 0.3434   |
| 42 | A | 1014.0200 | 3.6071  | 1.0205   | 27.8250  |
| 43 | A | 1048.7657 | 1.3770  | 2.5857   | 18.3539  |
| 44 | A | 1068.6249 | 1.0713  | 2.6493   | 0.0204   |
| 45 | A | 1124.4653 | 9.9858  | 84.6107  | 8.3314   |
| 46 | A | 1133.4524 | 4.5751  | 42.3870  | 0.2280   |
| 47 | A | 1138.5098 | 1.0845  | 0.7365   | 2.3101   |
| 48 | A | 1163.7715 | 9.9256  | 3.3873   | 0.3820   |
| 49 | A | 1179.5384 | 0.9038  | 1.4474   | 3.8715   |
| 50 | A | 1195.6474 | 10.8686 | 447.9143 | 15.7554  |
| 51 | A | 1200.2735 | 0.9578  | 12.1711  | 2.8349   |
| 52 | A | 1220.5477 | 11.2188 | 242.0356 | 0.3011   |
| 53 | A | 1257.2077 | 11.4951 | 240.3331 | 0.6811   |
| 54 | A | 1262.8555 | 11.7969 | 253.9687 | 8.6867   |
| 55 | A | 1301.8056 | 3.2431  | 78.0069  | 12.0681  |
| 56 | A | 1350.4976 | 5.7959  | 6.5881   | 1.0523   |
| 57 | A | 1368.1352 | 1.4267  | 0.0149   | 0.1687   |
| 58 | A | 1501.3665 | 3.0866  | 1.7973   | 1.2638   |
| 59 | A | 1531.7386 | 3.2705  | 58.5483  | 1.3864   |
| 60 | A | 1628.7128 | 8.9042  | 4.0771   | 3.4822   |
| 61 | A | 1646.4521 | 4.8653  | 31.7363  | 18.3590  |
| 62 | A | 1666.0596 | 2.2419  | 121.2892 | 18.8729  |
| 63 | A | 3152.4769 | 6.3589  | 14.1838  | 12.9551  |
| 64 | A | 3153.9179 | 6.3744  | 2.4106   | 94.6919  |
| 65 | A | 3168.5029 | 6.4477  | 4.0684   | 143.5936 |
| 66 | A | 3173.8034 | 6.4918  | 30.5725  | 22.2533  |
| 67 | A | 3190.7720 | 6.5816  | 11.3826  | 220.4410 |
| 68 | A | 3566.7490 | 7.8523  | 15.3232  | 153.5804 |
| 69 | A | 3661.6264 | 8.6760  | 14.0480  | 42.1222  |

-----

ALN\_iC3F7I\_8

| NM# | Symm | Wavenumber | Force Const | IR Intens | Raman Activ |
|-----|------|------------|-------------|-----------|-------------|
| 1   | A    | 18.2754    | 0.0011      | 0.0312    | 0.6756      |
| 2   | A    | 26.9373    | 0.0052      | 0.0124    | 0.0397      |
| 3   | A    | 27.9866    | 0.0058      | 0.1417    | 0.4970      |
| 4   | A    | 37.5952    | 0.0104      | 0.1654    | 0.5501      |
| 5   | A    | 44.0220    | 0.0062      | 0.6898    | 3.6464      |
| 6   | A    | 51.9703    | 0.0062      | 0.9930    | 5.8973      |
| 7   | A    | 59.6945    | 0.0135      | 0.5561    | 3.0224      |
| 8   | A    | 77.5024    | 0.0604      | 0.1345    | 0.1375      |
| 9   | A    | 129.7654   | 0.2240      | 0.1655    | 0.3383      |
| 10  | A    | 141.9031   | 0.2732      | 0.7514    | 0.3784      |
| 11  | A    | 178.9146   | 0.3612      | 0.5516    | 0.5218      |
| 12  | A    | 225.2592   | 0.1078      | 8.8155    | 2.4801      |
| 13  | A    | 247.8701   | 0.8315      | 0.2045    | 6.6171      |
| 14  | A    | 254.4615   | 0.6938      | 0.4092    | 0.1581      |
| 15  | A    | 267.0276   | 0.0439      | 22.0480   | 0.0975      |
| 16  | A    | 285.2704   | 0.8964      | 1.6613    | 1.0704      |
| 17  | A    | 298.1133   | 0.9527      | 0.4047    | 0.5251      |
| 18  | A    | 323.0536   | 1.1176      | 0.1160    | 1.4731      |
| 19  | A    | 343.6624   | 1.2920      | 0.0718    | 1.4004      |
| 20  | A    | 384.1456   | 0.2556      | 0.1211    | 0.6034      |
| 21  | A    | 416.3995   | 0.3020      | 0.2416    | 0.3067      |
| 22  | A    | 463.4160   | 2.2703      | 3.0007    | 1.4673      |
| 23  | A    | 503.5872   | 0.3447      | 80.9536   | 1.0657      |
| 24  | A    | 530.5501   | 2.9743      | 3.2446    | 0.4168      |
| 25  | A    | 534.6433   | 3.0001      | 8.2789    | 2.2141      |
| 26  | A    | 538.4826   | 1.1049      | 5.7066    | 3.7343      |
| 27  | A    | 556.8380   | 3.2924      | 0.2140    | 0.0784      |
| 28  | A    | 608.2718   | 3.4388      | 7.1134    | 2.7794      |
| 29  | A    | 615.8768   | 0.3140      | 314.2076  | 6.0979      |
| 30  | A    | 636.7593   | 1.5180      | 0.1450    | 2.8020      |
| 31  | A    | 697.8118   | 0.5794      | 28.8984   | 0.2414      |
| 32  | A    | 703.5488   | 4.7102      | 34.2782   | 0.0771      |
| 33  | A    | 742.1302   | 5.4692      | 32.5384   | 13.5055     |
| 34  | A    | 756.4212   | 0.6083      | 88.4959   | 2.0216      |
| 35  | A    | 824.7550   | 0.5062      | 2.6288    | 0.6274      |
| 36  | A    | 834.2742   | 1.7889      | 5.2185    | 19.9608     |

|    |   |           |         |          |          |
|----|---|-----------|---------|----------|----------|
| 37 | A | 879.6856  | 0.9617  | 65.0862  | 1.1155   |
| 38 | A | 882.2160  | 1.6323  | 65.6538  | 5.9054   |
| 39 | A | 947.6031  | 7.4395  | 87.2621  | 0.3322   |
| 40 | A | 965.8200  | 0.7435  | 0.0536   | 0.1905   |
| 41 | A | 982.8376  | 0.7170  | 0.0885   | 0.2758   |
| 42 | A | 1014.4451 | 3.6049  | 0.7199   | 28.7455  |
| 43 | A | 1049.0561 | 1.3777  | 2.5726   | 17.7156  |
| 44 | A | 1069.2516 | 1.0719  | 3.5641   | 0.2070   |
| 45 | A | 1124.2000 | 10.0096 | 117.5681 | 4.4380   |
| 46 | A | 1137.0155 | 1.8506  | 13.6325  | 1.9731   |
| 47 | A | 1139.3087 | 1.6683  | 21.5777  | 1.3946   |
| 48 | A | 1165.2362 | 10.2479 | 4.8984   | 0.3017   |
| 49 | A | 1179.8625 | 0.9036  | 1.3397   | 3.8268   |
| 50 | A | 1200.5117 | 0.9572  | 8.7038   | 2.7885   |
| 51 | A | 1202.3548 | 11.0345 | 231.3829 | 6.3864   |
| 52 | A | 1216.2410 | 11.2288 | 361.5739 | 1.3342   |
| 53 | A | 1254.2354 | 11.4138 | 246.2140 | 0.7588   |
| 54 | A | 1263.4638 | 11.8487 | 298.6327 | 4.9702   |
| 55 | A | 1300.6770 | 3.2480  | 62.0709  | 19.2191  |
| 56 | A | 1350.9242 | 5.7545  | 6.6798   | 1.0134   |
| 57 | A | 1368.3967 | 1.4302  | 0.1195   | 0.1394   |
| 58 | A | 1501.4669 | 3.0834  | 2.0649   | 1.4173   |
| 59 | A | 1531.7876 | 3.2667  | 53.5272  | 1.6042   |
| 60 | A | 1628.9261 | 8.8965  | 4.2805   | 6.3398   |
| 61 | A | 1646.4223 | 4.9513  | 29.8306  | 18.9470  |
| 62 | A | 1665.8428 | 2.2213  | 108.5365 | 18.5794  |
| 63 | A | 3153.7496 | 6.3639  | 13.5338  | 11.1482  |
| 64 | A | 3155.4107 | 6.3795  | 2.2699   | 85.6170  |
| 65 | A | 3169.5154 | 6.4525  | 4.5801   | 132.4502 |
| 66 | A | 3174.6741 | 6.4958  | 29.0929  | 25.3647  |
| 67 | A | 3191.3909 | 6.5845  | 11.3248  | 228.6581 |
| 68 | A | 3565.1541 | 7.8451  | 12.8803  | 142.9220 |
| 69 | A | 3659.6845 | 8.6653  | 12.2388  | 38.9946  |

-----

ALN\_iC3F7I\_trml

| NM# | Symm | Wavenumber | Force Const | IR Intens | Raman Activ |
|-----|------|------------|-------------|-----------|-------------|
| 1   | A    | 0.9312     | 0.0000      | 0.0074    | 0.1723      |
| 2   | A    | 2.7409     | 0.0001      | 0.0319    | 0.0906      |
| 3   | A    | 6.4770     | 0.0003      | 0.4581    | 0.1529      |
| 4   | A    | 7.6410     | 0.0005      | 0.4238    | 0.2983      |
| 5   | A    | 15.6097    | 0.0024      | 0.0116    | 1.1326      |
| 6   | A    | 19.0154    | 0.0030      | 0.0160    | 0.8273      |
| 7   | A    | 24.9837    | 0.0064      | 0.1141    | 0.3357      |
| 8   | A    | 40.2306    | 0.0180      | 0.0100    | 0.0096      |
| 9   | A    | 40.3111    | 0.0176      | 0.0414    | 0.0018      |
| 10  | A    | 46.7841    | 0.0074      | 0.5880    | 3.4306      |
| 11  | A    | 50.7968    | 0.0139      | 0.2835    | 1.2421      |
| 12  | A    | 52.1299    | 0.0106      | 0.5587    | 0.7685      |
| 13  | A    | 70.1763    | 0.0130      | 1.0015    | 13.3211     |
| 14  | A    | 75.3876    | 0.0652      | 0.0424    | 0.5701      |
| 15  | A    | 78.2603    | 0.0756      | 0.1210    | 0.0635      |
| 16  | A    | 119.2269   | 0.0491      | 20.0215   | 16.3852     |
| 17  | A    | 131.1259   | 0.2361      | 0.3720    | 1.1939      |
| 18  | A    | 133.0933   | 0.2115      | 0.0110    | 0.2198      |
| 19  | A    | 142.3103   | 0.2695      | 1.0751    | 6.9222      |
| 20  | A    | 143.3222   | 0.2382      | 19.1237   | 4.5015      |
| 21  | A    | 177.5096   | 0.3601      | 1.7343    | 3.4080      |
| 22  | A    | 178.3060   | 0.3609      | 4.9612    | 2.7243      |
| 23  | A    | 236.3850   | 0.4748      | 7.0623    | 99.3503     |
| 24  | A    | 244.2912   | 0.8120      | 4.0258    | 71.9609     |
| 25  | A    | 254.7436   | 0.6666      | 0.8763    | 0.1921      |
| 26  | A    | 254.8936   | 0.6173      | 0.8166    | 0.1852      |
| 27  | A    | 256.4621   | 0.1726      | 0.5919    | 4.4454      |
| 28  | A    | 280.4606   | 0.8701      | 1.0140    | 6.3505      |
| 29  | A    | 281.9710   | 0.8813      | 1.8059    | 4.3800      |
| 30  | A    | 298.2383   | 0.9575      | 0.4085    | 0.6887      |
| 31  | A    | 298.8130   | 0.9457      | 0.3318    | 0.7339      |
| 32  | A    | 324.2525   | 1.1346      | 0.1035    | 2.1441      |

|     |   |           |         |          |          |
|-----|---|-----------|---------|----------|----------|
| 33  | A | 324.8572  | 1.1377  | 0.0830   | 2.2988   |
| 34  | A | 343.0466  | 1.2854  | 0.1104   | 1.0110   |
| 35  | A | 343.1218  | 1.2101  | 0.0341   | 1.6209   |
| 36  | A | 356.5384  | 0.1041  | 7.5309   | 0.3195   |
| 37  | A | 409.7592  | 0.2771  | 1.8656   | 3.3148   |
| 38  | A | 426.2686  | 0.2041  | 3.2874   | 2.0016   |
| 39  | A | 462.4909  | 2.2656  | 1.9322   | 3.3238   |
| 40  | A | 462.7453  | 2.2534  | 1.7535   | 2.8873   |
| 41  | A | 511.5030  | 0.4147  | 36.3203  | 12.2393  |
| 42  | A | 529.9344  | 2.9701  | 3.2247   | 0.4517   |
| 43  | A | 529.9946  | 2.9701  | 3.3875   | 0.4414   |
| 44  | A | 532.8248  | 2.9663  | 4.7184   | 21.7727  |
| 45  | A | 533.7306  | 2.9859  | 7.1878   | 20.8027  |
| 46  | A | 541.5595  | 1.0925  | 1.5771   | 9.5409   |
| 47  | A | 556.7117  | 3.2834  | 0.2108   | 0.0477   |
| 48  | A | 556.9062  | 3.2948  | 0.3148   | 0.0773   |
| 49  | A | 606.7935  | 3.8950  | 5.5204   | 2.3010   |
| 50  | A | 606.9689  | 3.8940  | 1.7935   | 2.0000   |
| 51  | A | 635.9740  | 1.5182  | 0.5317   | 5.8082   |
| 52  | A | 700.8027  | 0.6902  | 37.0028  | 3.3752   |
| 53  | A | 701.9742  | 4.7541  | 38.8771  | 0.0848   |
| 54  | A | 702.8171  | 3.6962  | 45.8553  | 0.1356   |
| 55  | A | 736.7482  | 0.5491  | 109.3934 | 92.4972  |
| 56  | A | 741.4772  | 4.4606  | 6.0888   | 47.9158  |
| 57  | A | 741.9330  | 1.5084  | 59.0068  | 4.4582   |
| 58  | A | 783.1385  | 0.6742  | 389.0755 | 93.5643  |
| 59  | A | 834.5653  | 0.5315  | 1.4857   | 7.4538   |
| 60  | A | 837.0800  | 1.1625  | 33.6249  | 47.0939  |
| 61  | A | 883.8085  | 4.4218  | 211.0067 | 41.7012  |
| 62  | A | 884.5287  | 6.0435  | 27.4156  | 214.8264 |
| 63  | A | 895.2555  | 0.7067  | 22.3542  | 16.5473  |
| 64  | A | 948.7358  | 7.5469  | 101.9187 | 0.1904   |
| 65  | A | 948.8887  | 7.4555  | 106.7736 | 0.3259   |
| 66  | A | 969.8808  | 0.7465  | 1.3164   | 5.4097   |
| 67  | A | 987.7373  | 0.7347  | 0.3499   | 2.3835   |
| 68  | A | 1018.2636 | 3.6294  | 0.3463   | 45.6436  |
| 69  | A | 1049.9293 | 1.3837  | 2.2601   | 13.9848  |
| 70  | A | 1075.8802 | 1.0869  | 3.6016   | 3.9589   |
| 71  | A | 1097.4570 | 9.5242  | 103.7337 | 19.0656  |
| 72  | A | 1103.5918 | 9.6535  | 107.0471 | 16.4823  |
| 73  | A | 1129.0377 | 9.8137  | 37.0902  | 2.0123   |
| 74  | A | 1135.7576 | 10.0208 | 33.2877  | 1.9003   |
| 75  | A | 1141.8149 | 0.9630  | 3.7039   | 1.3235   |
| 76  | A | 1158.9387 | 10.3428 | 9.9940   | 0.4395   |
| 77  | A | 1161.6435 | 10.3957 | 7.4430   | 0.5529   |
| 78  | A | 1184.5372 | 0.9157  | 1.9231   | 10.7636  |
| 79  | A | 1195.4036 | 10.9258 | 363.0749 | 17.7735  |
| 80  | A | 1200.3440 | 10.8525 | 293.8345 | 11.2146  |
| 81  | A | 1202.5775 | 0.9647  | 8.0627   | 5.9958   |
| 82  | A | 1209.4416 | 11.1561 | 346.2493 | 8.2800   |
| 83  | A | 1212.9487 | 11.1674 | 308.7730 | 13.1168  |
| 84  | A | 1254.8981 | 10.1049 | 864.9263 | 32.8815  |
| 85  | A | 1258.4551 | 11.4211 | 202.6890 | 24.2778  |
| 86  | A | 1259.7999 | 11.7640 | 120.1926 | 148.6843 |
| 87  | A | 1263.1431 | 11.5751 | 267.9297 | 1.1840   |
| 88  | A | 1285.6117 | 3.3975  | 58.5603  | 101.6747 |
| 89  | A | 1350.6765 | 5.4699  | 3.3371   | 17.1968  |
| 90  | A | 1371.3596 | 1.4404  | 0.1657   | 0.3129   |
| 91  | A | 1501.4075 | 3.0067  | 7.6153   | 18.6699  |
| 92  | A | 1530.7403 | 3.1876  | 70.5592  | 32.5142  |
| 93  | A | 1632.6274 | 8.8333  | 12.2620  | 50.9719  |
| 94  | A | 1643.9084 | 5.8363  | 40.6155  | 49.4466  |
| 95  | A | 1661.6966 | 2.0427  | 77.5390  | 16.5217  |
| 96  | A | 3161.7286 | 6.4088  | 5.9455   | 26.9808  |
| 97  | A | 3164.2432 | 6.4195  | 4.1237   | 51.1812  |
| 98  | A | 3178.3713 | 6.4866  | 1.6253   | 108.7862 |
| 99  | A | 3184.7297 | 6.5358  | 11.3861  | 45.3684  |
| 100 | A | 3198.9615 | 6.6178  | 7.1147   | 240.8279 |
| 101 | A | 3536.9125 | 7.7273  | 20.7317  | 155.8499 |
| 102 | A | 3627.3187 | 8.5087  | 20.2324  | 29.9061  |



ALN\_ic3F7I\_trm2

| NM# | Symm | Wavenumber | Force Const | IR Intens | Raman Activ |
|-----|------|------------|-------------|-----------|-------------|
| 1   | A    | 1.4366     | 0.0000      | 0.0189    | 0.2233      |
| 2   | A    | 2.8306     | 0.0001      | 0.0173    | 0.0453      |
| 3   | A    | 6.4721     | 0.0003      | 0.4492    | 0.2245      |
| 4   | A    | 7.6786     | 0.0005      | 0.4182    | 0.2735      |
| 5   | A    | 17.0751    | 0.0030      | 0.0243    | 1.0485      |
| 6   | A    | 19.1390    | 0.0029      | 0.0081    | 1.1844      |
| 7   | A    | 24.2828    | 0.0064      | 0.0719    | 0.2529      |
| 8   | A    | 40.0993    | 0.0174      | 0.0455    | 0.0035      |
| 9   | A    | 40.2464    | 0.0180      | 0.0109    | 0.0084      |
| 10  | A    | 46.8325    | 0.0075      | 0.5708    | 3.3676      |
| 11  | A    | 49.4361    | 0.0143      | 0.4068    | 1.4327      |
| 12  | A    | 51.8582    | 0.0097      | 0.6445    | 0.8720      |
| 13  | A    | 70.2359    | 0.0130      | 1.0433    | 13.4443     |
| 14  | A    | 75.3973    | 0.0655      | 0.0424    | 0.5391      |
| 15  | A    | 77.9351    | 0.0740      | 0.0149    | 0.2426      |
| 16  | A    | 119.8461   | 0.0489      | 22.5282   | 17.7378     |
| 17  | A    | 131.0899   | 0.2360      | 0.3136    | 1.2619      |
| 18  | A    | 133.0289   | 0.2116      | 0.0574    | 0.2013      |
| 19  | A    | 142.6088   | 0.2803      | 0.9151    | 6.2447      |
| 20  | A    | 143.1937   | 0.2480      | 17.0378   | 5.4954      |
| 21  | A    | 177.5133   | 0.3601      | 2.4649    | 2.5594      |
| 22  | A    | 178.5626   | 0.3675      | 1.5246    | 5.3935      |
| 23  | A    | 237.8154   | 0.7533      | 11.2338   | 78.2183     |
| 24  | A    | 244.2514   | 0.7624      | 3.6325    | 85.4831     |
| 25  | A    | 252.5115   | 0.1524      | 1.1765    | 18.4199     |
| 26  | A    | 254.7567   | 0.6959      | 0.7940    | 0.1659      |
| 27  | A    | 255.0319   | 0.6548      | 0.4743    | 0.5083      |
| 28  | A    | 281.5258   | 0.7847      | 1.7345    | 2.2907      |
| 29  | A    | 281.9678   | 0.8809      | 1.9733    | 4.1025      |
| 30  | A    | 298.2315   | 0.9575      | 0.4097    | 0.6899      |
| 31  | A    | 298.9068   | 0.9466      | 0.3182    | 0.7594      |
| 32  | A    | 324.2526   | 1.1346      | 0.1033    | 2.1452      |
| 33  | A    | 325.0289   | 1.1309      | 0.1199    | 2.3393      |
| 34  | A    | 343.0523   | 1.2877      | 0.1099    | 1.3677      |
| 35  | A    | 343.1768   | 1.2259      | 0.0308    | 1.0969      |
| 36  | A    | 356.9682   | 0.1052      | 7.4496    | 0.3114      |
| 37  | A    | 409.8494   | 0.2789      | 1.8389    | 3.4337      |
| 38  | A    | 427.2388   | 0.2017      | 3.3998    | 1.8916      |
| 39  | A    | 462.5003   | 2.2650      | 1.8679    | 2.8245      |
| 40  | A    | 462.5976   | 2.2564      | 3.2441    | 4.5893      |
| 41  | A    | 511.2234   | 0.4167      | 37.9191   | 16.1349     |
| 42  | A    | 529.9532   | 2.9703      | 3.2778    | 0.4625      |
| 43  | A    | 529.9987   | 2.9703      | 3.4513    | 0.4388      |
| 44  | A    | 532.9514   | 2.8213      | 4.4864    | 19.8628     |
| 45  | A    | 533.7326   | 2.9856      | 7.5524    | 19.5522     |
| 46  | A    | 541.6611   | 1.1002      | 1.0419    | 7.1474      |
| 47  | A    | 556.7503   | 3.2837      | 0.2043    | 0.0484      |
| 48  | A    | 556.9082   | 3.2947      | 0.3108    | 0.0777      |
| 49  | A    | 606.6315   | 3.8737      | 6.0921    | 1.7154      |
| 50  | A    | 606.9650   | 3.8962      | 2.4906    | 2.2950      |
| 51  | A    | 635.9479   | 1.5182      | 0.5271    | 5.8589      |
| 52  | A    | 700.4510   | 0.6884      | 36.6357   | 3.9314      |
| 53  | A    | 701.9127   | 4.7103      | 39.5405   | 0.0200      |
| 54  | A    | 702.8025   | 3.9551      | 44.9525   | 0.1246      |
| 55  | A    | 736.9447   | 0.6014      | 131.0858  | 99.8628     |
| 56  | A    | 741.5333   | 5.3672      | 19.4759   | 48.5170     |
| 57  | A    | 742.2789   | 1.1768      | 27.8325   | 1.8877      |
| 58  | A    | 783.5981   | 0.6772      | 396.5117  | 103.8851    |
| 59  | A    | 834.6735   | 0.5301      | 1.5527    | 7.7182      |
| 60  | A    | 837.2642   | 1.1600      | 35.6210   | 48.1616     |
| 61  | A    | 884.2664   | 5.1712      | 191.5120  | 49.7767     |
| 62  | A    | 884.8977   | 4.7592      | 38.3337   | 185.4282    |
| 63  | A    | 895.0289   | 0.7072      | 21.4923   | 17.1007     |
| 64  | A    | 948.8274   | 7.5307      | 82.1946   | 0.2750      |
| 65  | A    | 948.8907   | 7.4748      | 126.5476  | 0.2155      |
| 66  | A    | 970.1025   | 0.7467      | 1.2896    | 5.3724      |

|     |   |           |         |          |          |
|-----|---|-----------|---------|----------|----------|
| 67  | A | 987.8348  | 0.7347  | 0.3351   | 2.3846   |
| 68  | A | 1018.2642 | 3.6287  | 0.3238   | 46.0712  |
| 69  | A | 1049.9145 | 1.3837  | 2.1859   | 14.3822  |
| 70  | A | 1075.9480 | 1.0872  | 3.5574   | 3.9423   |
| 71  | A | 1097.3214 | 9.5391  | 88.9613  | 27.6953  |
| 72  | A | 1103.5981 | 9.6536  | 107.3923 | 16.1325  |
| 73  | A | 1129.4752 | 9.8372  | 36.6773  | 2.1288   |
| 74  | A | 1135.7442 | 10.0200 | 33.5131  | 1.9400   |
| 75  | A | 1141.8565 | 0.9630  | 3.5249   | 1.3462   |
| 76  | A | 1158.3061 | 10.2999 | 8.4443   | 0.3677   |
| 77  | A | 1161.6773 | 10.3966 | 7.3776   | 0.5546   |
| 78  | A | 1184.5334 | 0.9157  | 1.9648   | 10.8542  |
| 79  | A | 1195.5736 | 10.9209 | 377.3211 | 23.0876  |
| 80  | A | 1200.3553 | 10.8321 | 287.2851 | 11.3533  |
| 81  | A | 1202.5912 | 0.9650  | 7.5245   | 6.0447   |
| 82  | A | 1209.3559 | 11.1206 | 262.7901 | 12.3514  |
| 83  | A | 1212.8908 | 11.1684 | 322.9029 | 12.1516  |
| 84  | A | 1255.2850 | 10.3403 | 881.7071 | 25.6922  |
| 85  | A | 1258.4488 | 11.4241 | 122.8850 | 14.9226  |
| 86  | A | 1260.2649 | 11.7729 | 316.4273 | 144.8611 |
| 87  | A | 1263.5301 | 11.5816 | 263.9828 | 0.5903   |
| 88  | A | 1285.3211 | 3.3753  | 25.4568  | 95.6915  |
| 89  | A | 1350.6450 | 5.4653  | 3.3262   | 17.4590  |
| 90  | A | 1371.3627 | 1.4404  | 0.1625   | 0.3074   |
| 91  | A | 1501.3721 | 3.0061  | 7.5983   | 18.6695  |
| 92  | A | 1530.7150 | 3.1872  | 71.4835  | 31.4991  |
| 93  | A | 1632.5990 | 8.8295  | 12.3136  | 50.6255  |
| 94  | A | 1643.8635 | 5.8195  | 41.6029  | 50.7847  |
| 95  | A | 1661.5258 | 2.0441  | 77.9193  | 16.5133  |
| 96  | A | 3161.7342 | 6.4088  | 6.0566   | 27.2813  |
| 97  | A | 3164.2858 | 6.4197  | 4.2441   | 51.4633  |
| 98  | A | 3178.3654 | 6.4866  | 1.6331   | 108.9869 |
| 99  | A | 3184.7282 | 6.5358  | 11.4150  | 46.2136  |
| 100 | A | 3198.9447 | 6.6178  | 7.2173   | 244.1530 |
| 101 | A | 3536.6801 | 7.7265  | 20.0087  | 155.8574 |
| 102 | A | 3626.8854 | 8.5064  | 20.1471  | 29.3787  |

-----

ALN\_nc3F7I\_trml

| NM# | Symm | Wavenumber | Force Const | IR Intens | Raman Activ |
|-----|------|------------|-------------|-----------|-------------|
| 1   | A    | 4.5086     | 0.0001      | 0.1378    | 0.1750      |
| 2   | A    | 10.4050    | 0.0011      | 0.0644    | 1.1884      |
| 3   | A    | 12.8576    | 0.0015      | 0.0124    | 0.0742      |
| 4   | A    | 14.5173    | 0.0014      | 0.0098    | 0.0389      |
| 5   | A    | 16.4472    | 0.0029      | 0.0162    | 0.0474      |
| 6   | A    | 18.4343    | 0.0036      | 0.0331    | 0.3006      |
| 7   | A    | 26.7285    | 0.0048      | 0.3783    | 0.1410      |
| 8   | A    | 33.8388    | 0.0166      | 0.0371    | 0.3282      |
| 9   | A    | 35.5676    | 0.0160      | 0.0192    | 0.1360      |
| 10  | A    | 43.2826    | 0.0096      | 0.2059    | 1.1344      |
| 11  | A    | 46.2953    | 0.0081      | 0.2252    | 1.4491      |
| 12  | A    | 61.2210    | 0.0107      | 0.1503    | 4.8215      |
| 13  | A    | 69.0042    | 0.0191      | 1.7190    | 5.0325      |
| 14  | A    | 71.0394    | 0.0578      | 0.0747    | 0.2052      |
| 15  | A    | 75.0342    | 0.0461      | 0.0068    | 0.2546      |
| 16  | A    | 104.8956   | 0.0371      | 6.9119    | 18.8035     |
| 17  | A    | 111.8960   | 0.1271      | 1.8542    | 0.8480      |
| 18  | A    | 116.4327   | 0.1736      | 0.8539    | 0.0773      |
| 19  | A    | 158.0894   | 0.3808      | 4.1366    | 10.7440     |
| 20  | A    | 160.0204   | 0.3787      | 1.9207    | 8.9586      |
| 21  | A    | 214.4148   | 0.4898      | 0.0704    | 0.0388      |
| 22  | A    | 214.8597   | 0.4896      | 4.7161    | 0.2979      |
| 23  | A    | 231.6591   | 0.5938      | 0.0275    | 0.0145      |
| 24  | A    | 231.9474   | 0.5948      | 0.0664    | 0.0066      |
| 25  | A    | 244.2285   | 0.1324      | 1.1496    | 11.9362     |
| 26  | A    | 262.1545   | 0.8778      | 2.9864    | 33.9641     |
| 27  | A    | 262.7622   | 0.6620      | 0.0661    | 2.0605      |
| 28  | A    | 266.1189   | 0.8082      | 0.0969    | 1.0872      |
| 29  | A    | 269.3173   | 0.9296      | 0.1900    | 20.9577     |

|     |   |           |         |          |          |
|-----|---|-----------|---------|----------|----------|
| 30  | A | 287.0817  | 0.8953  | 4.3911   | 1.2586   |
| 31  | A | 288.5058  | 0.9120  | 4.8236   | 0.3577   |
| 32  | A | 336.6815  | 1.2474  | 0.8295   | 0.8791   |
| 33  | A | 337.7280  | 1.2549  | 0.4497   | 1.9958   |
| 34  | A | 353.4237  | 0.1005  | 7.0212   | 0.0438   |
| 35  | A | 371.4591  | 1.5207  | 0.0085   | 0.7581   |
| 36  | A | 372.3337  | 1.5259  | 0.0544   | 1.5577   |
| 37  | A | 379.0178  | 1.2562  | 0.1122   | 0.8061   |
| 38  | A | 379.5179  | 1.5267  | 0.5900   | 0.6075   |
| 39  | A | 408.5128  | 0.2730  | 0.0553   | 0.0964   |
| 40  | A | 421.5000  | 0.2082  | 1.6169   | 0.2867   |
| 41  | A | 506.8071  | 2.4675  | 0.6399   | 0.2225   |
| 42  | A | 507.1134  | 2.2634  | 3.3545   | 0.3682   |
| 43  | A | 508.1747  | 0.4150  | 35.1823  | 6.1487   |
| 44  | A | 526.5281  | 2.8860  | 12.5668  | 2.2382   |
| 45  | A | 527.0511  | 2.9169  | 6.2805   | 2.6637   |
| 46  | A | 539.9979  | 1.0916  | 1.6805   | 3.5855   |
| 47  | A | 579.7951  | 3.4292  | 4.7755   | 9.4029   |
| 48  | A | 582.0439  | 3.4550  | 9.6068   | 6.3301   |
| 49  | A | 596.3477  | 3.7662  | 0.1276   | 2.1232   |
| 50  | A | 596.6257  | 3.7739  | 0.2536   | 1.6801   |
| 51  | A | 635.9821  | 1.5172  | 0.1555   | 3.3015   |
| 52  | A | 665.2185  | 3.8865  | 48.0413  | 0.9659   |
| 53  | A | 667.3725  | 4.4078  | 68.0946  | 1.7689   |
| 54  | A | 696.4091  | 0.6884  | 68.2111  | 15.0891  |
| 55  | A | 714.3917  | 0.4896  | 194.5301 | 84.5657  |
| 56  | A | 726.5070  | 3.8946  | 144.2771 | 36.1185  |
| 57  | A | 727.9970  | 1.4030  | 20.9037  | 3.1579   |
| 58  | A | 776.1282  | 0.6437  | 254.0544 | 27.0558  |
| 59  | A | 805.5220  | 5.0339  | 51.1892  | 1.0318   |
| 60  | A | 808.5620  | 4.7060  | 135.0465 | 22.7334  |
| 61  | A | 831.0631  | 0.5137  | 1.1452   | 0.4252   |
| 62  | A | 834.6308  | 1.4775  | 3.7135   | 24.8693  |
| 63  | A | 892.2109  | 0.6934  | 6.5559   | 7.5236   |
| 64  | A | 970.7213  | 0.7518  | 0.0035   | 0.0859   |
| 65  | A | 983.1878  | 0.7124  | 0.6386   | 1.6632   |
| 66  | A | 1017.2637 | 3.6952  | 1.4596   | 36.9526  |
| 67  | A | 1045.8053 | 3.2136  | 31.3149  | 12.5572  |
| 68  | A | 1048.5531 | 1.8794  | 36.8466  | 17.3660  |
| 69  | A | 1057.8334 | 8.6186  | 1.1700   | 100.1438 |
| 70  | A | 1073.8367 | 1.0750  | 2.0950   | 0.0670   |
| 71  | A | 1109.9654 | 9.8325  | 82.5586  | 1.1868   |
| 72  | A | 1112.8006 | 9.6683  | 48.6008  | 0.9655   |
| 73  | A | 1119.2537 | 10.0209 | 248.3171 | 0.4905   |
| 74  | A | 1129.0144 | 9.9716  | 47.8451  | 0.0781   |
| 75  | A | 1140.1745 | 0.9595  | 4.2881   | 1.5265   |
| 76  | A | 1166.1678 | 10.3870 | 88.7441  | 0.6478   |
| 77  | A | 1170.5819 | 10.4773 | 95.3151  | 0.6399   |
| 78  | A | 1181.7636 | 10.8553 | 574.2292 | 6.9575   |
| 79  | A | 1183.0157 | 0.9112  | 0.7715   | 4.2169   |
| 80  | A | 1186.4179 | 10.9480 | 44.3584  | 16.5905  |
| 81  | A | 1202.5347 | 0.9626  | 8.8747   | 6.4160   |
| 82  | A | 1206.7555 | 11.2765 | 12.7128  | 0.7990   |
| 83  | A | 1214.0333 | 11.4267 | 793.2606 | 1.1198   |
| 84  | A | 1245.3229 | 11.0090 | 33.3445  | 1.4693   |
| 85  | A | 1249.9802 | 11.4242 | 28.1717  | 8.5336   |
| 86  | A | 1285.5514 | 3.4047  | 126.3371 | 30.4371  |
| 87  | A | 1298.9676 | 11.2030 | 97.7470  | 4.2592   |
| 88  | A | 1300.8451 | 11.6543 | 299.7620 | 9.9742   |
| 89  | A | 1351.6564 | 5.6742  | 1.3511   | 4.8409   |
| 90  | A | 1370.3949 | 1.4321  | 0.0134   | 0.1240   |
| 91  | A | 1503.0296 | 3.0551  | 4.5642   | 3.3329   |
| 92  | A | 1530.3262 | 3.1916  | 68.8148  | 8.1099   |
| 93  | A | 1630.6152 | 8.9269  | 3.9928   | 3.2351   |
| 94  | A | 1643.6419 | 5.0329  | 38.1746  | 45.9058  |
| 95  | A | 1660.4161 | 2.1633  | 114.1215 | 29.1746  |
| 96  | A | 3161.4692 | 6.4026  | 11.2733  | 18.2738  |
| 97  | A | 3162.5787 | 6.4146  | 1.7634   | 74.5201  |
| 98  | A | 3175.8128 | 6.4758  | 2.7534   | 104.1615 |
| 99  | A | 3183.4536 | 6.5310  | 13.0937  | 40.8575  |
| 100 | A | 3195.6850 | 6.6048  | 5.4115   | 229.1886 |

|     |   |           |        |         |          |
|-----|---|-----------|--------|---------|----------|
| 101 | A | 3543.6783 | 7.7553 | 24.2642 | 192.2258 |
| 102 | A | 3636.5064 | 8.5549 | 20.5781 | 44.9466  |

-----

ALN\_nc3F7I\_trm2

| NM# | Symm | Wavenumber | Force Const | IR Intens | Raman Activ |
|-----|------|------------|-------------|-----------|-------------|
| 1   | A    | 1.6659     | 0.0000      | 0.0243    | 0.0314      |
| 2   | A    | 2.1666     | 0.0000      | 0.0380    | 0.1916      |
| 3   | A    | 6.3052     | 0.0003      | 0.2733    | 0.1268      |
| 4   | A    | 7.1662     | 0.0004      | 0.2317    | 0.1700      |
| 5   | A    | 12.6682    | 0.0017      | 0.0048    | 0.6431      |
| 6   | A    | 15.9919    | 0.0019      | 0.0193    | 0.7006      |
| 7   | A    | 21.3316    | 0.0049      | 0.1676    | 0.2434      |
| 8   | A    | 25.0650    | 0.0046      | 0.3722    | 0.1728      |
| 9   | A    | 31.9487    | 0.0104      | 0.0381    | 0.7024      |
| 10  | A    | 45.4033    | 0.0080      | 0.2249    | 3.4833      |
| 11  | A    | 46.8158    | 0.0113      | 0.2722    | 1.9100      |
| 12  | A    | 52.1733    | 0.0118      | 0.5233    | 0.4597      |
| 13  | A    | 66.6005    | 0.0132      | 0.8397    | 11.1346     |
| 14  | A    | 71.5373    | 0.0602      | 0.0425    | 0.1761      |
| 15  | A    | 75.0217    | 0.0413      | 0.0771    | 1.0358      |
| 16  | A    | 109.2744   | 0.1153      | 0.4970    | 1.9015      |
| 17  | A    | 111.3109   | 0.0902      | 3.3879    | 5.6505      |
| 18  | A    | 118.6952   | 0.0643      | 22.4132   | 9.3927      |
| 19  | A    | 157.4401   | 0.3661      | 6.5503    | 19.0636     |
| 20  | A    | 159.0308   | 0.3743      | 2.1611    | 16.7967     |
| 21  | A    | 213.2634   | 0.4880      | 2.2453    | 0.3601      |
| 22  | A    | 213.5973   | 0.4790      | 2.6826    | 0.2270      |
| 23  | A    | 231.1627   | 0.5910      | 0.1017    | 0.0024      |
| 24  | A    | 231.4972   | 0.5930      | 0.1011    | 0.0038      |
| 25  | A    | 247.2151   | 0.1458      | 0.7840    | 61.5704     |
| 26  | A    | 262.6653   | 0.6384      | 0.0019    | 1.4299      |
| 27  | A    | 264.3137   | 0.7964      | 2.9864    | 2.9999      |
| 28  | A    | 265.0876   | 0.6601      | 1.2184    | 25.9817     |
| 29  | A    | 266.6184   | 0.8983      | 0.9407    | 52.1311     |
| 30  | A    | 286.6885   | 0.8894      | 4.7824    | 1.2825      |
| 31  | A    | 287.2644   | 0.8984      | 3.2839    | 1.1652      |
| 32  | A    | 336.7807   | 1.2474      | 0.8269    | 1.2416      |
| 33  | A    | 337.0494   | 1.2500      | 0.5206    | 2.0908      |
| 34  | A    | 350.7718   | 0.0938      | 9.0141    | 0.5018      |
| 35  | A    | 371.2929   | 1.5198      | 0.0158    | 0.9267      |
| 36  | A    | 371.4057   | 1.5192      | 0.0560    | 1.1319      |
| 37  | A    | 378.9199   | 1.1967      | 0.1488    | 0.4013      |
| 38  | A    | 379.2929   | 1.5160      | 0.4957    | 0.7198      |
| 39  | A    | 406.9803   | 0.2635      | 1.4839    | 1.7355      |
| 40  | A    | 419.5184   | 0.2358      | 1.8324    | 2.6289      |
| 41  | A    | 506.3266   | 2.4097      | 2.9532    | 0.8713      |
| 42  | A    | 506.7276   | 2.6049      | 1.5884    | 0.3160      |
| 43  | A    | 510.5880   | 0.4167      | 38.8192   | 11.0288     |
| 44  | A    | 526.6229   | 2.9184      | 7.9688    | 3.0452      |
| 45  | A    | 526.9104   | 2.9121      | 6.6287    | 2.7962      |
| 46  | A    | 541.2027   | 1.0922      | 1.4190    | 7.6328      |
| 47  | A    | 580.1972   | 3.4249      | 8.4076    | 14.9476     |
| 48  | A    | 582.3517   | 3.4572      | 11.2316   | 14.0084     |
| 49  | A    | 596.2284   | 3.7650      | 0.0849    | 2.2492      |
| 50  | A    | 596.4272   | 3.7717      | 0.1642    | 2.1555      |
| 51  | A    | 636.1351   | 1.5184      | 0.4967    | 5.2508      |
| 52  | A    | 665.9918   | 4.4046      | 74.9518   | 0.7516      |
| 53  | A    | 666.9277   | 4.3782      | 34.9092   | 1.3673      |
| 54  | A    | 699.5476   | 0.6678      | 60.0110   | 4.5999      |
| 55  | A    | 722.9409   | 1.1270      | 281.1210  | 54.0937     |
| 56  | A    | 725.9140   | 4.8908      | 15.2401   | 81.2845     |
| 57  | A    | 730.2272   | 0.5532      | 110.9610  | 40.0941     |
| 58  | A    | 774.0960   | 0.6568      | 346.7530  | 55.4801     |
| 59  | A    | 805.8293   | 5.2251      | 169.6710  | 27.6677     |
| 60  | A    | 806.8326   | 5.2276      | 46.7278   | 65.2027     |
| 61  | A    | 833.3285   | 0.5338      | 2.1536    | 5.0518      |
| 62  | A    | 836.0109   | 1.2615      | 9.6414    | 37.7789     |
| 63  | A    | 893.1049   | 0.6777      | 39.0515   | 21.2097     |

|     |   |           |         |          |          |
|-----|---|-----------|---------|----------|----------|
| 64  | A | 969.2232  | 0.7445  | 0.8253   | 4.7591   |
| 65  | A | 986.7014  | 0.7320  | 0.2720   | 2.0167   |
| 66  | A | 1017.9617 | 3.6343  | 0.3404   | 41.1810  |
| 67  | A | 1049.8959 | 1.4074  | 6.3253   | 14.4015  |
| 68  | A | 1052.1859 | 8.0495  | 43.6566  | 64.7762  |
| 69  | A | 1053.9004 | 8.1644  | 32.4919  | 113.2369 |
| 70  | A | 1074.8190 | 1.0834  | 3.9127   | 3.3565   |
| 71  | A | 1112.8120 | 9.9180  | 317.2827 | 0.7167   |
| 72  | A | 1113.7423 | 9.6632  | 52.7246  | 0.4017   |
| 73  | A | 1116.2078 | 9.9986  | 196.3479 | 0.4916   |
| 74  | A | 1124.1685 | 9.8768  | 50.9923  | 0.4461   |
| 75  | A | 1141.1986 | 0.9628  | 3.3854   | 1.4309   |
| 76  | A | 1167.1463 | 10.4138 | 86.6117  | 0.6824   |
| 77  | A | 1169.0729 | 10.4573 | 85.2806  | 0.9149   |
| 78  | A | 1183.4958 | 10.5983 | 283.6294 | 18.1428  |
| 79  | A | 1184.0008 | 0.9296  | 1.0934   | 12.1883  |
| 80  | A | 1186.1596 | 9.3077  | 281.1674 | 14.3668  |
| 81  | A | 1202.4973 | 0.9624  | 6.6889   | 5.4162   |
| 82  | A | 1208.3323 | 11.3110 | 412.2134 | 1.0737   |
| 83  | A | 1211.1168 | 11.3616 | 426.1975 | 1.1577   |
| 84  | A | 1246.0974 | 11.0147 | 131.9618 | 11.9443  |
| 85  | A | 1247.1291 | 11.3573 | 43.8754  | 33.7596  |
| 86  | A | 1285.1467 | 3.4375  | 122.2417 | 62.0923  |
| 87  | A | 1299.0145 | 11.8556 | 238.2061 | 9.0159   |
| 88  | A | 1300.7524 | 10.9800 | 156.7488 | 6.5518   |
| 89  | A | 1350.5177 | 5.5156  | 3.2564   | 14.5046  |
| 90  | A | 1371.0464 | 1.4385  | 0.1643   | 0.3080   |
| 91  | A | 1501.4656 | 3.0167  | 7.3176   | 16.6113  |
| 92  | A | 1530.9056 | 3.1962  | 67.3228  | 24.1089  |
| 93  | A | 1632.3578 | 8.8571  | 10.1871  | 41.1077  |
| 94  | A | 1644.3002 | 5.6154  | 39.3635  | 39.9908  |
| 95  | A | 1661.9057 | 2.0748  | 80.0126  | 17.0128  |
| 96  | A | 3161.0374 | 6.4047  | 6.7262   | 26.1523  |
| 97  | A | 3163.2419 | 6.4151  | 3.8906   | 54.0422  |
| 98  | A | 3177.4140 | 6.4828  | 1.8303   | 111.1499 |
| 99  | A | 3183.7364 | 6.5318  | 12.8574  | 42.7123  |
| 100 | A | 3198.1646 | 6.6144  | 7.6991   | 240.5733 |
| 101 | A | 3540.1886 | 7.7408  | 20.1877  | 155.5769 |
| 102 | A | 3631.2422 | 8.5277  | 19.5267  | 32.0444  |

ANL2\_01

| NM# | Symm | Wavenumber | Force Const | IR Intens | Raman Activ |
|-----|------|------------|-------------|-----------|-------------|
| 1   | A    | 7.9331     | 0.0001      | 0.3980    | 8.2020      |
| 2   | A    | 30.1373    | 0.0021      | 0.3266    | 6.5253      |
| 3   | A    | 35.8144    | 0.0040      | 0.0062    | 3.5232      |
| 4   | A    | 55.8542    | 0.0085      | 0.0499    | 0.6728      |
| 5   | A    | 65.7013    | 0.0107      | 0.5339    | 0.6944      |
| 6   | A    | 109.4347   | 0.0374      | 1.5482    | 2.7721      |
| 7   | A    | 221.9289   | 0.1023      | 1.9515    | 0.5632      |
| 8   | A    | 234.3823   | 0.1196      | 2.2666    | 0.9285      |
| 9   | A    | 306.6779   | 0.0585      | 17.2256   | 0.1979      |
| 10  | A    | 380.2876   | 0.1860      | 5.2842    | 0.6299      |
| 11  | A    | 398.2540   | 0.2206      | 3.9604    | 0.4838      |
| 12  | A    | 407.6974   | 0.1798      | 28.0728   | 1.8637      |
| 13  | A    | 414.8042   | 0.2778      | 2.1421    | 0.1460      |
| 14  | A    | 422.2249   | 0.2261      | 16.8991   | 0.4964      |
| 15  | A    | 509.1510   | 0.3901      | 39.1196   | 0.2445      |
| 16  | A    | 517.4390   | 0.4024      | 12.6519   | 0.1474      |
| 17  | A    | 539.8296   | 1.0855      | 2.9545    | 5.0442      |
| 18  | A    | 540.1107   | 1.0737      | 0.9374    | 3.6782      |
| 19  | A    | 636.5687   | 1.5194      | 0.0984    | 3.0035      |
| 20  | A    | 637.4477   | 1.5124      | 0.9545    | 5.0905      |
| 21  | A    | 661.8116   | 0.3105      | 223.0496  | 4.4156      |
| 22  | A    | 695.1664   | 0.4629      | 171.3745  | 4.5739      |
| 23  | A    | 701.8481   | 0.4503      | 35.0865   | 1.2441      |
| 24  | A    | 703.0479   | 0.5225      | 27.4747   | 0.2024      |
| 25  | A    | 760.6233   | 0.6340      | 55.3379   | 1.2386      |
| 26  | A    | 769.9022   | 0.6410      | 131.2362  | 2.9333      |

|    |   |           |        |          |          |
|----|---|-----------|--------|----------|----------|
| 27 | A | 825.1750  | 0.5052 | 0.7616   | 0.6817   |
| 28 | A | 831.5752  | 0.5267 | 0.7274   | 1.0505   |
| 29 | A | 833.0225  | 1.5777 | 3.7028   | 19.7822  |
| 30 | A | 835.4862  | 1.6448 | 2.0957   | 27.2328  |
| 31 | A | 883.8457  | 0.7145 | 3.9492   | 0.3393   |
| 32 | A | 894.9299  | 0.7060 | 14.4877  | 0.6758   |
| 33 | A | 962.7920  | 0.7281 | 0.1474   | 0.0883   |
| 34 | A | 973.0736  | 0.7570 | 0.0452   | 0.0345   |
| 35 | A | 981.1468  | 0.7241 | 0.0186   | 0.3321   |
| 36 | A | 991.6442  | 0.7387 | 0.1966   | 0.5854   |
| 37 | A | 1013.1334 | 3.5544 | 4.4932   | 39.7501  |
| 38 | A | 1016.6217 | 3.6253 | 0.5290   | 21.5421  |
| 39 | A | 1048.4279 | 1.3847 | 3.8934   | 15.7371  |
| 40 | A | 1049.8163 | 1.3794 | 3.3924   | 21.6999  |
| 41 | A | 1071.8749 | 1.0768 | 4.5717   | 0.0726   |
| 42 | A | 1074.5737 | 1.0838 | 4.0241   | 0.1101   |
| 43 | A | 1139.7775 | 0.9602 | 2.1793   | 2.3448   |
| 44 | A | 1143.2571 | 0.9581 | 0.9108   | 3.7603   |
| 45 | A | 1177.7620 | 0.8933 | 2.0736   | 4.6977   |
| 46 | A | 1181.9960 | 0.9044 | 1.2081   | 3.5172   |
| 47 | A | 1200.9571 | 0.9577 | 20.2497  | 1.9385   |
| 48 | A | 1201.9780 | 0.9585 | 2.0925   | 2.7624   |
| 49 | A | 1286.4337 | 3.2091 | 32.6182  | 10.5823  |
| 50 | A | 1305.6606 | 3.2519 | 70.9669  | 15.0018  |
| 51 | A | 1350.3775 | 5.7085 | 4.6165   | 1.2094   |
| 52 | A | 1351.0854 | 5.7860 | 10.7233  | 1.9946   |
| 53 | A | 1368.3121 | 1.4213 | 0.0692   | 0.1795   |
| 54 | A | 1368.8983 | 1.4331 | 0.0660   | 0.1488   |
| 55 | A | 1499.6483 | 3.0906 | 2.1670   | 0.4799   |
| 56 | A | 1501.6350 | 3.0609 | 3.4852   | 1.3845   |
| 57 | A | 1530.4953 | 3.2255 | 20.8531  | 1.7324   |
| 58 | A | 1531.1686 | 3.2772 | 86.5353  | 1.9290   |
| 59 | A | 1624.3903 | 8.7662 | 1.5678   | 7.4527   |
| 60 | A | 1632.5989 | 9.0195 | 3.5903   | 4.1901   |
| 61 | A | 1644.2673 | 5.3579 | 28.3310  | 20.8079  |
| 62 | A | 1648.1254 | 5.8476 | 51.0469  | 21.1848  |
| 63 | A | 1660.6596 | 2.2694 | 94.2313  | 19.2887  |
| 64 | A | 1681.8481 | 1.9921 | 107.2352 | 14.8594  |
| 65 | A | 3147.5454 | 6.3431 | 13.3495  | 61.0046  |
| 66 | A | 3158.3471 | 6.3908 | 9.0395   | 43.7574  |
| 67 | A | 3161.5917 | 6.4058 | 3.9996   | 67.3655  |
| 68 | A | 3161.9376 | 6.4025 | 0.5700   | 82.3530  |
| 69 | A | 3169.7100 | 6.4653 | 33.0921  | 87.0856  |
| 70 | A | 3174.9860 | 6.4725 | 3.5529   | 127.7425 |
| 71 | A | 3181.9230 | 6.5247 | 21.2406  | 29.7546  |
| 72 | A | 3188.3974 | 6.5653 | 20.3424  | 184.1817 |
| 73 | A | 3196.3001 | 6.6073 | 8.8560   | 222.7968 |
| 74 | A | 3210.5489 | 6.6262 | 0.0832   | 238.3525 |
| 75 | A | 3508.8403 | 7.6509 | 231.9251 | 288.1388 |
| 76 | A | 3546.7204 | 7.7672 | 12.4262  | 161.6798 |
| 77 | A | 3638.8158 | 8.5629 | 16.4627  | 53.1072  |
| 78 | A | 3641.5216 | 8.5404 | 62.0543  | 91.7851  |

ANL2\_02

| NM# | Symm | Wavenumber | Force Const | IR Intens | Raman Activ |
|-----|------|------------|-------------|-----------|-------------|
| 1   | A    | 7.9289     | 0.0001      | 0.3980    | 8.2016      |
| 2   | A    | 30.1362    | 0.0021      | 0.3266    | 6.5255      |
| 3   | A    | 35.8139    | 0.0040      | 0.0062    | 3.5231      |
| 4   | A    | 55.8551    | 0.0085      | 0.0499    | 0.6730      |
| 5   | A    | 65.6996    | 0.0107      | 0.5339    | 0.6944      |
| 6   | A    | 109.4366   | 0.0374      | 1.5483    | 2.7721      |
| 7   | A    | 221.9288   | 0.1023      | 1.9516    | 0.5632      |
| 8   | A    | 234.3824   | 0.1196      | 2.2667    | 0.9284      |
| 9   | A    | 306.6753   | 0.0585      | 17.2230   | 0.1979      |
| 10  | A    | 380.2861   | 0.1860      | 5.2861    | 0.6300      |
| 11  | A    | 398.2539   | 0.2206      | 3.9613    | 0.4837      |
| 12  | A    | 407.6937   | 0.1797      | 28.0826   | 1.8642      |
| 13  | A    | 414.8039   | 0.2778      | 2.1408    | 0.1459      |

|    |   |           |        |          |          |
|----|---|-----------|--------|----------|----------|
| 14 | A | 422.2230  | 0.2261 | 16.8905  | 0.4961   |
| 15 | A | 509.1508  | 0.3901 | 39.1211  | 0.2444   |
| 16 | A | 517.4387  | 0.4024 | 12.6515  | 0.1474   |
| 17 | A | 539.8294  | 1.0855 | 2.9546   | 5.0429   |
| 18 | A | 540.1108  | 1.0737 | 0.9375   | 3.6794   |
| 19 | A | 636.5687  | 1.5194 | 0.0984   | 3.0035   |
| 20 | A | 637.4476  | 1.5124 | 0.9545   | 5.0904   |
| 21 | A | 661.8055  | 0.3105 | 223.0304 | 4.4154   |
| 22 | A | 695.1621  | 0.4628 | 171.4133 | 4.5757   |
| 23 | A | 701.8470  | 0.4504 | 35.0597  | 1.2425   |
| 24 | A | 703.0474  | 0.5225 | 27.4740  | 0.2023   |
| 25 | A | 760.6226  | 0.6340 | 55.3345  | 1.2385   |
| 26 | A | 769.9013  | 0.6410 | 131.2335 | 2.9333   |
| 27 | A | 825.1743  | 0.5052 | 0.7615   | 0.6817   |
| 28 | A | 831.5749  | 0.5267 | 0.7271   | 1.0499   |
| 29 | A | 833.0224  | 1.5777 | 3.7026   | 19.7830  |
| 30 | A | 835.4863  | 1.6449 | 2.0958   | 27.2323  |
| 31 | A | 883.8449  | 0.7145 | 3.9490   | 0.3392   |
| 32 | A | 894.9296  | 0.7060 | 14.4875  | 0.6757   |
| 33 | A | 962.7916  | 0.7281 | 0.1474   | 0.0883   |
| 34 | A | 973.0733  | 0.7570 | 0.0452   | 0.0345   |
| 35 | A | 981.1463  | 0.7241 | 0.0186   | 0.3321   |
| 36 | A | 991.6441  | 0.7387 | 0.1966   | 0.5854   |
| 37 | A | 1013.1333 | 3.5544 | 4.4935   | 39.7498  |
| 38 | A | 1016.6216 | 3.6253 | 0.5290   | 21.5423  |
| 39 | A | 1048.4278 | 1.3847 | 3.8934   | 15.7372  |
| 40 | A | 1049.8162 | 1.3794 | 3.3924   | 21.6999  |
| 41 | A | 1071.8742 | 1.0768 | 4.5709   | 0.0726   |
| 42 | A | 1074.5731 | 1.0838 | 4.0244   | 0.1101   |
| 43 | A | 1139.7769 | 0.9602 | 2.1792   | 2.3449   |
| 44 | A | 1143.2563 | 0.9581 | 0.9111   | 3.7602   |
| 45 | A | 1177.7618 | 0.8933 | 2.0736   | 4.6977   |
| 46 | A | 1181.9959 | 0.9044 | 1.2081   | 3.5172   |
| 47 | A | 1200.9569 | 0.9577 | 20.2499  | 1.9385   |
| 48 | A | 1201.9779 | 0.9585 | 2.0926   | 2.7624   |
| 49 | A | 1286.4338 | 3.2091 | 32.6179  | 10.5822  |
| 50 | A | 1305.6610 | 3.2519 | 70.9685  | 15.0020  |
| 51 | A | 1350.3774 | 5.7086 | 4.6166   | 1.2095   |
| 52 | A | 1351.0853 | 5.7861 | 10.7230  | 1.9945   |
| 53 | A | 1368.3118 | 1.4213 | 0.0692   | 0.1795   |
| 54 | A | 1368.8982 | 1.4331 | 0.0660   | 0.1488   |
| 55 | A | 1499.6480 | 3.0906 | 2.1669   | 0.4799   |
| 56 | A | 1501.6349 | 3.0609 | 3.4852   | 1.3846   |
| 57 | A | 1530.4952 | 3.2255 | 20.8530  | 1.7326   |
| 58 | A | 1531.1686 | 3.2772 | 86.5362  | 1.9289   |
| 59 | A | 1624.3900 | 8.7662 | 1.5680   | 7.4526   |
| 60 | A | 1632.5990 | 9.0195 | 3.5903   | 4.1901   |
| 61 | A | 1644.2670 | 5.3577 | 28.3312  | 20.8078  |
| 62 | A | 1648.1253 | 5.8475 | 51.0455  | 21.1842  |
| 63 | A | 1660.6588 | 2.2695 | 94.2332  | 19.2894  |
| 64 | A | 1681.8482 | 1.9921 | 107.2378 | 14.8593  |
| 65 | A | 3147.5460 | 6.3431 | 13.3495  | 61.0048  |
| 66 | A | 3158.3479 | 6.3908 | 9.0397   | 43.7539  |
| 67 | A | 3161.5913 | 6.4058 | 4.0008   | 67.3394  |
| 68 | A | 3161.9383 | 6.4025 | 0.5688   | 82.3835  |
| 69 | A | 3169.7107 | 6.4653 | 33.0923  | 87.0844  |
| 70 | A | 3174.9865 | 6.4725 | 3.5525   | 127.7416 |
| 71 | A | 3181.9236 | 6.5247 | 21.2406  | 29.7556  |
| 72 | A | 3188.3979 | 6.5653 | 20.3425  | 184.1826 |
| 73 | A | 3196.3007 | 6.6073 | 8.8560   | 222.7972 |
| 74 | A | 3210.5501 | 6.6262 | 0.0832   | 238.3499 |
| 75 | A | 3508.8425 | 7.6509 | 231.9414 | 288.1440 |
| 76 | A | 3546.7232 | 7.7672 | 12.4264  | 161.6787 |
| 77 | A | 3638.8195 | 8.5629 | 16.4630  | 53.1068  |
| 78 | A | 3641.5263 | 8.5404 | 62.0557  | 91.7853  |

ANL2\_03

-----  
 NM# Symm Wavenumber Force Const IR Intens Raman Activ  
 -----

|    |   |           |        |          |          |
|----|---|-----------|--------|----------|----------|
| 1  | A | 15.3479   | 0.0007 | 0.1905   | 2.8260   |
| 2  | A | 27.6339   | 0.0020 | 0.5097   | 2.1012   |
| 3  | A | 36.9562   | 0.0036 | 1.2749   | 1.5743   |
| 4  | A | 66.2105   | 0.0103 | 0.4425   | 5.9392   |
| 5  | A | 68.7641   | 0.0109 | 0.2798   | 2.7296   |
| 6  | A | 128.6486  | 0.0505 | 0.2218   | 9.5836   |
| 7  | A | 232.3533  | 0.1135 | 8.4326   | 0.9530   |
| 8  | A | 233.2502  | 0.1160 | 0.1748   | 2.0859   |
| 9  | A | 319.5189  | 0.0650 | 28.1785  | 0.3480   |
| 10 | A | 345.2833  | 0.0775 | 28.0729  | 0.7337   |
| 11 | A | 389.0402  | 0.2427 | 3.3707   | 0.2416   |
| 12 | A | 395.8288  | 0.2589 | 1.0024   | 1.2734   |
| 13 | A | 419.6804  | 0.3082 | 0.6488   | 0.1890   |
| 14 | A | 421.3627  | 0.3040 | 1.1851   | 0.2437   |
| 15 | A | 508.6031  | 0.3813 | 2.0898   | 1.0295   |
| 16 | A | 513.2829  | 0.3888 | 78.2849  | 1.3576   |
| 17 | A | 539.2461  | 1.1219 | 5.2100   | 3.8623   |
| 18 | A | 539.9729  | 1.0882 | 3.1243   | 3.5980   |
| 19 | A | 636.4050  | 1.4905 | 1.9472   | 6.6098   |
| 20 | A | 636.4923  | 1.4869 | 0.7575   | 0.8798   |
| 21 | A | 671.0791  | 0.3658 | 187.2156 | 6.2645   |
| 22 | A | 701.0701  | 0.6529 | 42.5748  | 0.8376   |
| 23 | A | 706.8558  | 0.5396 | 40.3656  | 0.1973   |
| 24 | A | 717.8727  | 0.3810 | 202.5022 | 7.4437   |
| 25 | A | 766.8031  | 0.6395 | 173.4427 | 1.9467   |
| 26 | A | 772.5863  | 0.6496 | 103.9956 | 3.7952   |
| 27 | A | 830.9667  | 0.6000 | 0.7544   | 3.1951   |
| 28 | A | 833.0560  | 0.9844 | 5.9723   | 15.4578  |
| 29 | A | 835.5147  | 0.5654 | 1.6249   | 1.1692   |
| 30 | A | 840.6500  | 1.3504 | 14.6741  | 31.2184  |
| 31 | A | 887.8761  | 0.7106 | 25.0895  | 1.3824   |
| 32 | A | 897.9612  | 0.7059 | 9.5191   | 0.1260   |
| 33 | A | 970.0719  | 0.7482 | 0.1763   | 0.0389   |
| 34 | A | 972.4669  | 0.7492 | 0.2361   | 0.0153   |
| 35 | A | 984.8453  | 0.7198 | 0.1481   | 0.3866   |
| 36 | A | 989.9424  | 0.7361 | 0.6759   | 0.1901   |
| 37 | A | 1014.3961 | 3.5626 | 1.4248   | 43.8601  |
| 38 | A | 1015.7446 | 3.5988 | 0.7976   | 19.7654  |
| 39 | A | 1048.0849 | 1.3690 | 4.1869   | 15.7380  |
| 40 | A | 1049.0763 | 1.3811 | 3.5468   | 21.1687  |
| 41 | A | 1073.7676 | 1.0852 | 4.2013   | 0.4064   |
| 42 | A | 1080.2408 | 1.1276 | 6.5749   | 0.3458   |
| 43 | A | 1141.5621 | 0.9631 | 2.4379   | 1.4105   |
| 44 | A | 1154.3499 | 0.9762 | 1.7792   | 1.4082   |
| 45 | A | 1178.5727 | 0.8955 | 1.1432   | 3.9427   |
| 46 | A | 1180.1381 | 0.9010 | 1.0872   | 3.6587   |
| 47 | A | 1198.6557 | 0.9534 | 9.1927   | 2.5718   |
| 48 | A | 1202.2896 | 0.9600 | 9.4644   | 2.1015   |
| 49 | A | 1288.5371 | 3.2043 | 47.4415  | 10.6693  |
| 50 | A | 1308.1899 | 3.2231 | 48.9752  | 17.9948  |
| 51 | A | 1350.1443 | 5.6908 | 4.9652   | 0.8734   |
| 52 | A | 1354.1102 | 4.6669 | 6.5959   | 0.3328   |
| 53 | A | 1369.5161 | 1.4282 | 0.0505   | 0.1594   |
| 54 | A | 1370.4445 | 1.5013 | 0.9922   | 0.2480   |
| 55 | A | 1501.1234 | 3.0626 | 2.1889   | 0.7753   |
| 56 | A | 1501.3845 | 3.0627 | 2.9324   | 2.0680   |
| 57 | A | 1530.2945 | 3.2171 | 51.7616  | 1.9035   |
| 58 | A | 1531.1760 | 3.3116 | 49.5904  | 1.4074   |
| 59 | A | 1626.1839 | 8.6317 | 4.7241   | 3.6912   |
| 60 | A | 1630.1872 | 8.2633 | 3.7654   | 7.8301   |
| 61 | A | 1643.3923 | 4.7361 | 33.0118  | 29.2853  |
| 62 | A | 1647.5486 | 5.5792 | 49.7986  | 15.6727  |
| 63 | A | 1659.6615 | 2.4735 | 110.5013 | 22.0457  |
| 64 | A | 1679.9167 | 1.9912 | 72.3347  | 10.3372  |
| 65 | A | 3152.9376 | 6.3681 | 9.5641   | 58.3513  |
| 66 | A | 3154.9232 | 6.3648 | 12.7801  | 6.6216   |
| 67 | A | 3158.0619 | 6.3876 | 0.1689   | 105.5866 |
| 68 | A | 3166.5793 | 6.4185 | 0.2295   | 60.3586  |
| 69 | A | 3171.2655 | 6.4638 | 8.1744   | 123.0151 |
| 70 | A | 3174.1844 | 6.4771 | 9.0984   | 107.0718 |
| 71 | A | 3174.8018 | 6.4972 | 35.0757  | 31.5640  |



|    |   |           |        |         |          |
|----|---|-----------|--------|---------|----------|
| 72 | A | 3182.7269 | 6.5263 | 19.4970 | 15.8402  |
| 73 | A | 3191.5183 | 6.5845 | 13.5531 | 237.8512 |
| 74 | A | 3193.6447 | 6.5975 | 9.5894  | 265.2668 |
| 75 | A | 3529.7895 | 7.7129 | 54.4116 | 153.3645 |
| 76 | A | 3550.5605 | 7.7827 | 11.0861 | 156.0469 |
| 77 | A | 3626.9919 | 8.4822 | 20.1345 | 33.6269  |
| 78 | A | 3645.0094 | 8.5950 | 16.8305 | 48.2795  |

ANL2\_04

| NM# | Symm | Wavenumber | Force Const | IR Intens | Raman Activ |
|-----|------|------------|-------------|-----------|-------------|
| 1   | A    | 15.3477    | 0.0007      | 0.1905    | 2.8261      |
| 2   | A    | 27.6342    | 0.0020      | 0.5097    | 2.1010      |
| 3   | A    | 36.9568    | 0.0036      | 1.2748    | 1.5743      |
| 4   | A    | 66.2099    | 0.0103      | 0.4425    | 5.9393      |
| 5   | A    | 68.7642    | 0.0109      | 0.2798    | 2.7295      |
| 6   | A    | 128.6487   | 0.0505      | 0.2218    | 9.5836      |
| 7   | A    | 232.3532   | 0.1135      | 8.4328    | 0.9529      |
| 8   | A    | 233.2502   | 0.1160      | 0.1747    | 2.0859      |
| 9   | A    | 319.5179   | 0.0650      | 28.1796   | 0.3480      |
| 10  | A    | 345.2873   | 0.0775      | 28.0716   | 0.7337      |
| 11  | A    | 389.0405   | 0.2427      | 3.3708    | 0.2416      |
| 12  | A    | 395.8287   | 0.2589      | 1.0022    | 1.2734      |
| 13  | A    | 419.6800   | 0.3082      | 0.6489    | 0.1890      |
| 14  | A    | 421.3624   | 0.3040      | 1.1850    | 0.2437      |
| 15  | A    | 508.6029   | 0.3813      | 2.0895    | 1.0295      |
| 16  | A    | 513.2826   | 0.3888      | 78.2868   | 1.3576      |
| 17  | A    | 539.2461   | 1.1219      | 5.2099    | 3.8622      |
| 18  | A    | 539.9730   | 1.0882      | 3.1244    | 3.5980      |
| 19  | A    | 636.4050   | 1.4904      | 1.9485    | 6.6101      |
| 20  | A    | 636.4923   | 1.4869      | 0.7571    | 0.8794      |
| 21  | A    | 671.0720   | 0.3658      | 187.2211  | 6.2647      |
| 22  | A    | 701.0702   | 0.6529      | 42.5651   | 0.8373      |
| 23  | A    | 706.8556   | 0.5396      | 40.3657   | 0.1972      |
| 24  | A    | 717.8753   | 0.3810      | 202.4984  | 7.4437      |
| 25  | A    | 766.8028   | 0.6395      | 173.4229  | 1.9467      |
| 26  | A    | 772.5876   | 0.6496      | 104.0206  | 3.7953      |
| 27  | A    | 830.9669   | 0.6000      | 0.7546    | 3.1951      |
| 28  | A    | 833.0559   | 0.9844      | 5.9719    | 15.4574     |
| 29  | A    | 835.5147   | 0.5654      | 1.6250    | 1.1694      |
| 30  | A    | 840.6502   | 1.3503      | 14.6754   | 31.2187     |
| 31  | A    | 887.8764   | 0.7106      | 25.0903   | 1.3825      |
| 32  | A    | 897.9610   | 0.7059      | 9.5185    | 0.1260      |
| 33  | A    | 970.0718   | 0.7482      | 0.1763    | 0.0389      |
| 34  | A    | 972.4668   | 0.7492      | 0.2360    | 0.0153      |
| 35  | A    | 984.8454   | 0.7198      | 0.1481    | 0.3866      |
| 36  | A    | 989.9425   | 0.7361      | 0.6759    | 0.1901      |
| 37  | A    | 1014.3963  | 3.5626      | 1.4247    | 43.8619     |
| 38  | A    | 1015.7446  | 3.5988      | 0.7977    | 19.7637     |
| 39  | A    | 1048.0850  | 1.3690      | 4.1869    | 15.7378     |
| 40  | A    | 1049.0763  | 1.3811      | 3.5468    | 21.1687     |
| 41  | A    | 1073.7673  | 1.0852      | 4.2013    | 0.4063      |
| 42  | A    | 1080.2414  | 1.1276      | 6.5750    | 0.3458      |
| 43  | A    | 1141.5619  | 0.9631      | 2.4379    | 1.4106      |
| 44  | A    | 1154.3511  | 0.9762      | 1.7792    | 1.4082      |
| 45  | A    | 1178.5726  | 0.8955      | 1.1432    | 3.9427      |
| 46  | A    | 1180.1381  | 0.9010      | 1.0872    | 3.6587      |
| 47  | A    | 1198.6557  | 0.9534      | 9.1925    | 2.5718      |
| 48  | A    | 1202.2896  | 0.9600      | 9.4645    | 2.1015      |
| 49  | A    | 1288.5375  | 3.2043      | 47.4423   | 10.6690     |
| 50  | A    | 1308.1888  | 3.2231      | 48.9745   | 17.9952     |
| 51  | A    | 1350.1445  | 5.6908      | 4.9653    | 0.8734      |
| 52  | A    | 1354.1104  | 4.6668      | 6.5959    | 0.3328      |
| 53  | A    | 1369.5160  | 1.4282      | 0.0504    | 0.1594      |
| 54  | A    | 1370.4448  | 1.5013      | 0.9923    | 0.2480      |
| 55  | A    | 1501.1233  | 3.0626      | 2.1888    | 0.7754      |
| 56  | A    | 1501.3846  | 3.0627      | 2.9324    | 2.0680      |
| 57  | A    | 1530.2946  | 3.2171      | 51.7636   | 1.9036      |
| 58  | A    | 1531.1759  | 3.3116      | 49.5879   | 1.4073      |

|    |   |           |        |          |          |
|----|---|-----------|--------|----------|----------|
| 59 | A | 1626.1844 | 8.6317 | 4.7240   | 3.6912   |
| 60 | A | 1630.1874 | 8.2633 | 3.7655   | 7.8302   |
| 61 | A | 1643.3922 | 4.7361 | 33.0117  | 29.2853  |
| 62 | A | 1647.5485 | 5.5792 | 49.7981  | 15.6724  |
| 63 | A | 1659.6614 | 2.4735 | 110.5020 | 22.0458  |
| 64 | A | 1679.9167 | 1.9912 | 72.3334  | 10.3371  |
| 65 | A | 3152.9379 | 6.3681 | 9.5638   | 58.3495  |
| 66 | A | 3154.9229 | 6.3648 | 12.7794  | 6.6249   |
| 67 | A | 3158.0620 | 6.3876 | 0.1691   | 105.5858 |
| 68 | A | 3166.5786 | 6.4185 | 0.2294   | 60.3587  |
| 69 | A | 3171.2654 | 6.4638 | 8.1761   | 123.0055 |
| 70 | A | 3174.1839 | 6.4771 | 9.1013   | 107.0909 |
| 71 | A | 3174.8019 | 6.4972 | 35.0714  | 31.5487  |
| 72 | A | 3182.7260 | 6.5263 | 19.4976  | 15.8391  |
| 73 | A | 3191.5176 | 6.5845 | 13.5528  | 237.8535 |
| 74 | A | 3193.6440 | 6.5975 | 9.5894   | 265.2685 |
| 75 | A | 3529.7849 | 7.7129 | 54.4116  | 153.3585 |
| 76 | A | 3550.5628 | 7.7827 | 11.0862  | 156.0524 |
| 77 | A | 3626.9888 | 8.4822 | 20.1338  | 33.6271  |
| 78 | A | 3645.0128 | 8.5951 | 16.8307  | 48.2796  |

-----  
 ANL2\_05

| NM# | Symm | Wavenumber | Force Const | IR Intens | Raman Activ |
|-----|------|------------|-------------|-----------|-------------|
| 1   | A    | 15.3507    | 0.0007      | 0.1906    | 2.8264      |
| 2   | A    | 27.6381    | 0.0020      | 0.5098    | 2.1017      |
| 3   | A    | 36.9527    | 0.0036      | 1.2748    | 1.5746      |
| 4   | A    | 66.2166    | 0.0103      | 0.4426    | 5.9379      |
| 5   | A    | 68.7634    | 0.0109      | 0.2797    | 2.7311      |
| 6   | A    | 128.6574   | 0.0505      | 0.2218    | 9.5830      |
| 7   | A    | 232.3526   | 0.1135      | 8.4329    | 0.9527      |
| 8   | A    | 233.2549   | 0.1160      | 0.1742    | 2.0855      |
| 9   | A    | 319.5205   | 0.0650      | 28.1836   | 0.3480      |
| 10  | A    | 345.3030   | 0.0775      | 28.0601   | 0.7338      |
| 11  | A    | 389.0410   | 0.2427      | 3.3722    | 0.2415      |
| 12  | A    | 395.8316   | 0.2588      | 1.0011    | 1.2733      |
| 13  | A    | 419.6799   | 0.3082      | 0.6486    | 0.1891      |
| 14  | A    | 421.3624   | 0.3040      | 1.1853    | 0.2437      |
| 15  | A    | 508.6028   | 0.3813      | 2.0921    | 1.0297      |
| 16  | A    | 513.2837   | 0.3888      | 78.2711   | 1.3574      |
| 17  | A    | 539.2462   | 1.1219      | 5.2099    | 3.8623      |
| 18  | A    | 539.9730   | 1.0882      | 3.1246    | 3.5980      |
| 19  | A    | 636.4052   | 1.4906      | 1.9426    | 6.6083      |
| 20  | A    | 636.4924   | 1.4868      | 0.7588    | 0.8807      |
| 21  | A    | 671.1027   | 0.3659      | 187.1862  | 6.2640      |
| 22  | A    | 701.0707   | 0.6529      | 42.5391   | 0.8367      |
| 23  | A    | 706.8562   | 0.5396      | 40.3639   | 0.1974      |
| 24  | A    | 717.8832   | 0.3811      | 202.5158  | 7.4440      |
| 25  | A    | 766.8053   | 0.6395      | 173.4669  | 1.9473      |
| 26  | A    | 772.5895   | 0.6496      | 104.0315  | 3.7954      |
| 27  | A    | 830.9662   | 0.6000      | 0.7544    | 3.1951      |
| 28  | A    | 833.0561   | 0.9844      | 5.9740    | 15.4581     |
| 29  | A    | 835.5149   | 0.5654      | 1.6239    | 1.1693      |
| 30  | A    | 840.6511   | 1.3503      | 14.6800   | 31.2181     |
| 31  | A    | 887.8759   | 0.7106      | 25.0915   | 1.3824      |
| 32  | A    | 897.9633   | 0.7059      | 9.5209    | 0.1260      |
| 33  | A    | 970.0718   | 0.7482      | 0.1763    | 0.0389      |
| 34  | A    | 972.4667   | 0.7492      | 0.2361    | 0.0153      |
| 35  | A    | 984.8451   | 0.7198      | 0.1482    | 0.3867      |
| 36  | A    | 989.9438   | 0.7361      | 0.6760    | 0.1901      |
| 37  | A    | 1014.3963  | 3.5625      | 1.4249    | 43.8559     |
| 38  | A    | 1015.7452  | 3.5988      | 0.7973    | 19.7674     |
| 39  | A    | 1048.0847  | 1.3690      | 4.1865    | 15.7382     |
| 40  | A    | 1049.0765  | 1.3811      | 3.5470    | 21.1681     |
| 41  | A    | 1073.7682  | 1.0852      | 4.2014    | 0.4062      |
| 42  | A    | 1080.2434  | 1.1277      | 6.5751    | 0.3459      |
| 43  | A    | 1141.5628  | 0.9631      | 2.4377    | 1.4105      |
| 44  | A    | 1154.3546  | 0.9763      | 1.7798    | 1.4084      |
| 45  | A    | 1178.5724  | 0.8955      | 1.1432    | 3.9429      |

|    |   |           |        |          |          |
|----|---|-----------|--------|----------|----------|
| 46 | A | 1180.1382 | 0.9010 | 1.0871   | 3.6586   |
| 47 | A | 1198.6551 | 0.9534 | 9.1928   | 2.5718   |
| 48 | A | 1202.2900 | 0.9600 | 9.4636   | 2.1013   |
| 49 | A | 1288.5332 | 3.2043 | 47.4376  | 10.6686  |
| 50 | A | 1308.1891 | 3.2231 | 48.9742  | 17.9946  |
| 51 | A | 1350.1443 | 5.6907 | 4.9648   | 0.8735   |
| 52 | A | 1354.1104 | 4.6666 | 6.5957   | 0.3329   |
| 53 | A | 1369.5165 | 1.4282 | 0.0505   | 0.1594   |
| 54 | A | 1370.4449 | 1.5014 | 0.9926   | 0.2480   |
| 55 | A | 1501.1238 | 3.0626 | 2.1892   | 0.7758   |
| 56 | A | 1501.3847 | 3.0627 | 2.9322   | 2.0676   |
| 57 | A | 1530.2943 | 3.2171 | 51.7610  | 1.9035   |
| 58 | A | 1531.1757 | 3.3116 | 49.5886  | 1.4072   |
| 59 | A | 1626.1840 | 8.6317 | 4.7240   | 3.6914   |
| 60 | A | 1630.1888 | 8.2638 | 3.7648   | 7.8296   |
| 61 | A | 1643.3922 | 4.7362 | 33.0103  | 29.2871  |
| 62 | A | 1647.5488 | 5.5790 | 49.8006  | 15.6726  |
| 63 | A | 1659.6614 | 2.4735 | 110.5045 | 22.0441  |
| 64 | A | 1679.9206 | 1.9912 | 72.3234  | 10.3355  |
| 65 | A | 3152.9369 | 6.3681 | 9.5643   | 58.3542  |
| 66 | A | 3154.9228 | 6.3648 | 12.7801  | 6.6214   |
| 67 | A | 3158.0615 | 6.3876 | 0.1689   | 105.5847 |
| 68 | A | 3166.5801 | 6.4185 | 0.2298   | 60.3565  |
| 69 | A | 3171.2651 | 6.4638 | 8.1740   | 123.0171 |
| 70 | A | 3174.1846 | 6.4771 | 9.0950   | 107.0495 |
| 71 | A | 3174.8016 | 6.4972 | 35.0796  | 31.5837  |
| 72 | A | 3182.7274 | 6.5263 | 19.4968  | 15.8430  |
| 73 | A | 3191.5179 | 6.5845 | 13.5528  | 237.8533 |
| 74 | A | 3193.6451 | 6.5975 | 9.5890   | 265.2529 |
| 75 | A | 3529.7719 | 7.7129 | 54.4406  | 153.3682 |
| 76 | A | 3550.5572 | 7.7826 | 11.0845  | 156.0507 |
| 77 | A | 3626.9854 | 8.4821 | 20.1390  | 33.6321  |
| 78 | A | 3645.0041 | 8.5950 | 16.8278  | 48.2793  |

-----

ANL2\_06

| NM# | Symm | Wavenumber | Force Const | IR Intens | Raman Activ |
|-----|------|------------|-------------|-----------|-------------|
| 1   | A    | 15.3465    | 0.0007      | 0.1905    | 2.8260      |
| 2   | A    | 27.6327    | 0.0020      | 0.5097    | 2.1013      |
| 3   | A    | 36.9568    | 0.0036      | 1.2749    | 1.5744      |
| 4   | A    | 66.2120    | 0.0103      | 0.4425    | 5.9393      |
| 5   | A    | 68.7652    | 0.0109      | 0.2798    | 2.7296      |
| 6   | A    | 128.6496   | 0.0505      | 0.2218    | 9.5834      |
| 7   | A    | 232.3530   | 0.1135      | 8.4327    | 0.9531      |
| 8   | A    | 233.2500   | 0.1160      | 0.1750    | 2.0857      |
| 9   | A    | 319.5210   | 0.0650      | 28.1785   | 0.3479      |
| 10  | A    | 345.2830   | 0.0775      | 28.0726   | 0.7337      |
| 11  | A    | 389.0406   | 0.2427      | 3.3709    | 0.2416      |
| 12  | A    | 395.8289   | 0.2589      | 1.0026    | 1.2734      |
| 13  | A    | 419.6805   | 0.3082      | 0.6488    | 0.1890      |
| 14  | A    | 421.3625   | 0.3040      | 1.1851    | 0.2437      |
| 15  | A    | 508.6031   | 0.3813      | 2.0899    | 1.0294      |
| 16  | A    | 513.2829   | 0.3888      | 78.2870   | 1.3576      |
| 17  | A    | 539.2462   | 1.1219      | 5.2102    | 3.8622      |
| 18  | A    | 539.9731   | 1.0882      | 3.1242    | 3.5980      |
| 19  | A    | 636.4050   | 1.4904      | 1.9482    | 6.6101      |
| 20  | A    | 636.4923   | 1.4869      | 0.7570    | 0.8796      |
| 21  | A    | 671.0783   | 0.3658      | 187.2205  | 6.2646      |
| 22  | A    | 701.0695   | 0.6529      | 42.6024   | 0.8384      |
| 23  | A    | 706.8557   | 0.5396      | 40.3669   | 0.1972      |
| 24  | A    | 717.8658   | 0.3810      | 202.5040  | 7.4435      |
| 25  | A    | 766.8028   | 0.6395      | 173.4641  | 1.9467      |
| 26  | A    | 772.5837   | 0.6496      | 103.9490  | 3.7949      |
| 27  | A    | 830.9669   | 0.6000      | 0.7544    | 3.1951      |
| 28  | A    | 833.0564   | 0.9843      | 5.9719    | 15.4574     |
| 29  | A    | 835.5146   | 0.5654      | 1.6252    | 1.1695      |
| 30  | A    | 840.6493   | 1.3504      | 14.6705   | 31.2181     |
| 31  | A    | 887.8759   | 0.7106      | 25.0871   | 1.3823      |
| 32  | A    | 897.9607   | 0.7059      | 9.5195    | 0.1260      |

|    |   |           |        |          |          |
|----|---|-----------|--------|----------|----------|
| 33 | A | 970.0720  | 0.7482 | 0.1763   | 0.0389   |
| 34 | A | 972.4668  | 0.7492 | 0.2361   | 0.0153   |
| 35 | A | 984.8453  | 0.7198 | 0.1481   | 0.3866   |
| 36 | A | 989.9422  | 0.7361 | 0.6759   | 0.1901   |
| 37 | A | 1014.3959 | 3.5626 | 1.4249   | 43.8596  |
| 38 | A | 1015.7445 | 3.5988 | 0.7977   | 19.7663  |
| 39 | A | 1048.0849 | 1.3690 | 4.1869   | 15.7384  |
| 40 | A | 1049.0763 | 1.3811 | 3.5468   | 21.1687  |
| 41 | A | 1073.7677 | 1.0852 | 4.2013   | 0.4063   |
| 42 | A | 1080.2402 | 1.1276 | 6.5748   | 0.3458   |
| 43 | A | 1141.5624 | 0.9631 | 2.4378   | 1.4105   |
| 44 | A | 1154.3488 | 0.9762 | 1.7792   | 1.4083   |
| 45 | A | 1178.5727 | 0.8955 | 1.1432   | 3.9426   |
| 46 | A | 1180.1381 | 0.9010 | 1.0873   | 3.6588   |
| 47 | A | 1198.6560 | 0.9534 | 9.1928   | 2.5718   |
| 48 | A | 1202.2896 | 0.9600 | 9.4645   | 2.1014   |
| 49 | A | 1288.5389 | 3.2043 | 47.4428  | 10.6695  |
| 50 | A | 1308.1917 | 3.2230 | 48.9758  | 17.9950  |
| 51 | A | 1350.1444 | 5.6908 | 4.9655   | 0.8733   |
| 52 | A | 1354.1103 | 4.6670 | 6.5959   | 0.3328   |
| 53 | A | 1369.5162 | 1.4282 | 0.0505   | 0.1594   |
| 54 | A | 1370.4444 | 1.5013 | 0.9921   | 0.2480   |
| 55 | A | 1501.1235 | 3.0626 | 2.1889   | 0.7751   |
| 56 | A | 1501.3846 | 3.0627 | 2.9323   | 2.0682   |
| 57 | A | 1530.2946 | 3.2171 | 51.7617  | 1.9036   |
| 58 | A | 1531.1763 | 3.3116 | 49.5914  | 1.4075   |
| 59 | A | 1626.1834 | 8.6317 | 4.7240   | 3.6911   |
| 60 | A | 1630.1869 | 8.2634 | 3.7653   | 7.8302   |
| 61 | A | 1643.3927 | 4.7362 | 33.0147  | 29.2861  |
| 62 | A | 1647.5489 | 5.5792 | 49.7972  | 15.6721  |
| 63 | A | 1659.6624 | 2.4734 | 110.4995 | 22.0454  |
| 64 | A | 1679.9163 | 1.9912 | 72.3385  | 10.3378  |
| 65 | A | 3152.9379 | 6.3681 | 9.5641   | 58.3505  |
| 66 | A | 3154.9229 | 6.3648 | 12.7805  | 6.6214   |
| 67 | A | 3158.0615 | 6.3876 | 0.1689   | 105.5859 |
| 68 | A | 3166.5793 | 6.4185 | 0.2295   | 60.3596  |
| 69 | A | 3171.2653 | 6.4638 | 8.1738   | 123.0176 |
| 70 | A | 3174.1844 | 6.4771 | 9.0974   | 107.0690 |
| 71 | A | 3174.8016 | 6.4972 | 35.0771  | 31.5681  |
| 72 | A | 3182.7269 | 6.5263 | 19.4969  | 15.8399  |
| 73 | A | 3191.5182 | 6.5845 | 13.5532  | 237.8505 |
| 74 | A | 3193.6447 | 6.5975 | 9.5895   | 265.2693 |
| 75 | A | 3529.7920 | 7.7129 | 54.4099  | 153.3673 |
| 76 | A | 3550.5595 | 7.7826 | 11.0863  | 156.0442 |
| 77 | A | 3626.9949 | 8.4822 | 20.1347  | 33.6269  |
| 78 | A | 3645.0082 | 8.5950 | 16.8307  | 48.2802  |

-----  
ANL2\_07

| NM# | Symm | Wavenumber | Force Const | IR Intens | Raman Activ |
|-----|------|------------|-------------|-----------|-------------|
| 1   | A    | 15.3479    | 0.0007      | 0.1905    | 2.8259      |
| 2   | A    | 27.6340    | 0.0020      | 0.5096    | 2.1013      |
| 3   | A    | 36.9563    | 0.0036      | 1.2748    | 1.5745      |
| 4   | A    | 66.2112    | 0.0103      | 0.4425    | 5.9390      |
| 5   | A    | 68.7643    | 0.0109      | 0.2798    | 2.7297      |
| 6   | A    | 128.6479   | 0.0504      | 0.2217    | 9.5834      |
| 7   | A    | 232.3539   | 0.1135      | 8.4328    | 0.9528      |
| 8   | A    | 233.2504   | 0.1160      | 0.1745    | 2.0860      |
| 9   | A    | 319.5213   | 0.0650      | 28.1811   | 0.3480      |
| 10  | A    | 345.2886   | 0.0775      | 28.0712   | 0.7337      |
| 11  | A    | 389.0410   | 0.2427      | 3.3711    | 0.2416      |
| 12  | A    | 395.8293   | 0.2589      | 1.0024    | 1.2734      |
| 13  | A    | 419.6805   | 0.3082      | 0.6488    | 0.1890      |
| 14  | A    | 421.3626   | 0.3040      | 1.1852    | 0.2436      |
| 15  | A    | 508.6036   | 0.3813      | 2.0894    | 1.0294      |
| 16  | A    | 513.2836   | 0.3888      | 78.2798   | 1.3576      |
| 17  | A    | 539.2459   | 1.1219      | 5.2103    | 3.8619      |
| 18  | A    | 539.9731   | 1.0882      | 3.1232    | 3.5985      |
| 19  | A    | 636.4052   | 1.4906      | 1.9433    | 6.6086      |

|    |   |           |        |          |          |
|----|---|-----------|--------|----------|----------|
| 20 | A | 636.4925  | 1.4868 | 0.7589   | 0.8810   |
| 21 | A | 671.0993  | 0.3658 | 187.2156 | 6.2643   |
| 22 | A | 701.0711  | 0.6529 | 42.5431  | 0.8370   |
| 23 | A | 706.8565  | 0.5396 | 40.3628  | 0.1973   |
| 24 | A | 717.8797  | 0.3811 | 202.5018 | 7.4438   |
| 25 | A | 766.8052  | 0.6395 | 173.4590 | 1.9468   |
| 26 | A | 772.5890  | 0.6496 | 104.0171 | 3.7955   |
| 27 | A | 830.9671  | 0.6000 | 0.7542   | 3.1953   |
| 28 | A | 833.0573  | 0.9844 | 5.9733   | 15.4579  |
| 29 | A | 835.5156  | 0.5654 | 1.6247   | 1.1688   |
| 30 | A | 840.6505  | 1.3503 | 14.6786  | 31.2196  |
| 31 | A | 887.8769  | 0.7106 | 25.0917  | 1.3825   |
| 32 | A | 897.9624  | 0.7059 | 9.5199   | 0.1260   |
| 33 | A | 970.0723  | 0.7482 | 0.1763   | 0.0389   |
| 34 | A | 972.4676  | 0.7492 | 0.2360   | 0.0153   |
| 35 | A | 984.8457  | 0.7198 | 0.1481   | 0.3866   |
| 36 | A | 989.9430  | 0.7361 | 0.6759   | 0.1901   |
| 37 | A | 1014.3963 | 3.5626 | 1.4247   | 43.8615  |
| 38 | A | 1015.7448 | 3.5988 | 0.7976   | 19.7639  |
| 39 | A | 1048.0852 | 1.3690 | 4.1870   | 15.7375  |
| 40 | A | 1049.0764 | 1.3811 | 3.5468   | 21.1692  |
| 41 | A | 1073.7694 | 1.0852 | 4.2015   | 0.4063   |
| 42 | A | 1080.2416 | 1.1276 | 6.5750   | 0.3458   |
| 43 | A | 1141.5641 | 0.9631 | 2.4376   | 1.4105   |
| 44 | A | 1154.3512 | 0.9762 | 1.7791   | 1.4082   |
| 45 | A | 1178.5730 | 0.8955 | 1.1432   | 3.9427   |
| 46 | A | 1180.1382 | 0.9010 | 1.0873   | 3.6587   |
| 47 | A | 1198.6560 | 0.9534 | 9.1926   | 2.5718   |
| 48 | A | 1202.2900 | 0.9600 | 9.4642   | 2.1014   |
| 49 | A | 1288.5377 | 3.2043 | 47.4411  | 10.6688  |
| 50 | A | 1308.1875 | 3.2230 | 48.9744  | 17.9953  |
| 51 | A | 1350.1450 | 5.6907 | 4.9654   | 0.8734   |
| 52 | A | 1354.1107 | 4.6668 | 6.5955   | 0.3328   |
| 53 | A | 1369.5167 | 1.4282 | 0.0505   | 0.1594   |
| 54 | A | 1370.4451 | 1.5013 | 0.9922   | 0.2480   |
| 55 | A | 1501.1238 | 3.0626 | 2.1891   | 0.7751   |
| 56 | A | 1501.3848 | 3.0627 | 2.9324   | 2.0682   |
| 57 | A | 1530.2949 | 3.2171 | 51.7632  | 1.9037   |
| 58 | A | 1531.1761 | 3.3116 | 49.5877  | 1.4073   |
| 59 | A | 1626.1848 | 8.6317 | 4.7239   | 3.6911   |
| 60 | A | 1630.1878 | 8.2634 | 3.7650   | 7.8302   |
| 61 | A | 1643.3931 | 4.7366 | 33.0196  | 29.2902  |
| 62 | A | 1647.5489 | 5.5794 | 49.7950  | 15.6695  |
| 63 | A | 1659.6633 | 2.4733 | 110.4969 | 22.0444  |
| 64 | A | 1679.9177 | 1.9912 | 72.3323  | 10.3366  |
| 65 | A | 3152.9355 | 6.3681 | 9.5644   | 58.3544  |
| 66 | A | 3154.9228 | 6.3648 | 12.7792  | 6.6242   |
| 67 | A | 3158.0619 | 6.3876 | 0.1691   | 105.5893 |
| 68 | A | 3166.5784 | 6.4185 | 0.2295   | 60.3561  |
| 69 | A | 3171.2654 | 6.4638 | 8.1767   | 123.0049 |
| 70 | A | 3174.1834 | 6.4771 | 9.1027   | 107.0982 |
| 71 | A | 3174.8016 | 6.4972 | 35.0696  | 31.5407  |
| 72 | A | 3182.7260 | 6.5263 | 19.4967  | 15.8407  |
| 73 | A | 3191.5173 | 6.5845 | 13.5527  | 237.8556 |
| 74 | A | 3193.6439 | 6.5975 | 9.5896   | 265.2646 |
| 75 | A | 3529.7811 | 7.7129 | 54.4106  | 153.3614 |
| 76 | A | 3550.5539 | 7.7826 | 11.0850  | 156.0501 |
| 77 | A | 3626.9848 | 8.4821 | 20.1327  | 33.6273  |
| 78 | A | 3645.0007 | 8.5950 | 16.8293  | 48.2797  |

-----  
ANL2\_08

| NM# | Symm | Wavenumber | Force Const | IR Intens | Raman Activ |
|-----|------|------------|-------------|-----------|-------------|
| 1   | A    | 15.3488    | 0.0007      | 0.1905    | 2.8262      |
| 2   | A    | 27.6367    | 0.0020      | 0.5096    | 2.1008      |
| 3   | A    | 36.9560    | 0.0036      | 1.2749    | 1.5746      |
| 4   | A    | 66.2108    | 0.0103      | 0.4425    | 5.9388      |
| 5   | A    | 68.7636    | 0.0109      | 0.2797    | 2.7300      |
| 6   | A    | 128.6521   | 0.0505      | 0.2218    | 9.5837      |

|    |   |           |        |          |          |
|----|---|-----------|--------|----------|----------|
| 7  | A | 232.3538  | 0.1135 | 8.4326   | 0.9529   |
| 8  | A | 233.2510  | 0.1160 | 0.1747   | 2.0857   |
| 9  | A | 319.5205  | 0.0650 | 28.1809  | 0.3480   |
| 10 | A | 345.2935  | 0.0775 | 28.0687  | 0.7337   |
| 11 | A | 389.0413  | 0.2427 | 3.3715   | 0.2416   |
| 12 | A | 395.8296  | 0.2589 | 1.0020   | 1.2734   |
| 13 | A | 419.6804  | 0.3082 | 0.6489   | 0.1890   |
| 14 | A | 421.3626  | 0.3040 | 1.1851   | 0.2437   |
| 15 | A | 508.6031  | 0.3813 | 2.0897   | 1.0295   |
| 16 | A | 513.2829  | 0.3888 | 78.2841  | 1.3576   |
| 17 | A | 539.2460  | 1.1219 | 5.2099   | 3.8621   |
| 18 | A | 539.9730  | 1.0882 | 3.1241   | 3.5981   |
| 19 | A | 636.4050  | 1.4905 | 1.9472   | 6.6098   |
| 20 | A | 636.4923  | 1.4869 | 0.7577   | 0.8798   |
| 21 | A | 671.0780  | 0.3658 | 187.2184 | 6.2645   |
| 22 | A | 701.0704  | 0.6529 | 42.5601  | 0.8372   |
| 23 | A | 706.8558  | 0.5396 | 40.3639  | 0.1972   |
| 24 | A | 717.8764  | 0.3810 | 202.5036 | 7.4437   |
| 25 | A | 766.8028  | 0.6395 | 173.4379 | 1.9468   |
| 26 | A | 772.5871  | 0.6496 | 104.0139 | 3.7953   |
| 27 | A | 830.9667  | 0.6000 | 0.7548   | 3.1941   |
| 28 | A | 833.0562  | 0.9844 | 5.9715   | 15.4580  |
| 29 | A | 835.5141  | 0.5654 | 1.6248   | 1.1696   |
| 30 | A | 840.6500  | 1.3504 | 14.6764  | 31.2190  |
| 31 | A | 887.8764  | 0.7106 | 25.0902  | 1.3825   |
| 32 | A | 897.9610  | 0.7059 | 9.5189   | 0.1260   |
| 33 | A | 970.0709  | 0.7482 | 0.1763   | 0.0389   |
| 34 | A | 972.4665  | 0.7492 | 0.2361   | 0.0153   |
| 35 | A | 984.8446  | 0.7198 | 0.1482   | 0.3866   |
| 36 | A | 989.9422  | 0.7361 | 0.6759   | 0.1901   |
| 37 | A | 1014.3962 | 3.5626 | 1.4248   | 43.8644  |
| 38 | A | 1015.7444 | 3.5988 | 0.7977   | 19.7613  |
| 39 | A | 1048.0848 | 1.3690 | 4.1868   | 15.7385  |
| 40 | A | 1049.0764 | 1.3811 | 3.5468   | 21.1679  |
| 41 | A | 1073.7673 | 1.0852 | 4.2014   | 0.4064   |
| 42 | A | 1080.2415 | 1.1276 | 6.5750   | 0.3458   |
| 43 | A | 1141.5618 | 0.9631 | 2.4378   | 1.4105   |
| 44 | A | 1154.3516 | 0.9762 | 1.7793   | 1.4081   |
| 45 | A | 1178.5725 | 0.8955 | 1.1432   | 3.9428   |
| 46 | A | 1180.1379 | 0.9010 | 1.0872   | 3.6587   |
| 47 | A | 1198.6552 | 0.9534 | 9.1925   | 2.5718   |
| 48 | A | 1202.2894 | 0.9600 | 9.4643   | 2.1015   |
| 49 | A | 1288.5380 | 3.2043 | 47.4421  | 10.6687  |
| 50 | A | 1308.1885 | 3.2230 | 48.9755  | 17.9955  |
| 51 | A | 1350.1438 | 5.6908 | 4.9654   | 0.8735   |
| 52 | A | 1354.1101 | 4.6669 | 6.5957   | 0.3328   |
| 53 | A | 1369.5159 | 1.4282 | 0.0505   | 0.1594   |
| 54 | A | 1370.4445 | 1.5013 | 0.9922   | 0.2480   |
| 55 | A | 1501.1229 | 3.0626 | 2.1888   | 0.7759   |
| 56 | A | 1501.3845 | 3.0627 | 2.9325   | 2.0675   |
| 57 | A | 1530.2945 | 3.2171 | 51.7680  | 1.9038   |
| 58 | A | 1531.1756 | 3.3116 | 49.5840  | 1.4071   |
| 59 | A | 1626.1842 | 8.6317 | 4.7241   | 3.6912   |
| 60 | A | 1630.1875 | 8.2634 | 3.7654   | 7.8302   |
| 61 | A | 1643.3917 | 4.7363 | 33.0133  | 29.2862  |
| 62 | A | 1647.5481 | 5.5795 | 49.8012  | 15.6735  |
| 63 | A | 1659.6621 | 2.4734 | 110.5004 | 22.0446  |
| 64 | A | 1679.9180 | 1.9912 | 72.3316  | 10.3366  |
| 65 | A | 3152.9388 | 6.3681 | 9.5638   | 58.3502  |
| 66 | A | 3154.9238 | 6.3648 | 12.7798  | 6.6254   |
| 67 | A | 3158.0624 | 6.3876 | 0.1691   | 105.5737 |
| 68 | A | 3166.5795 | 6.4185 | 0.2296   | 60.3476  |
| 69 | A | 3171.2653 | 6.4638 | 8.1733   | 123.0135 |
| 70 | A | 3174.1843 | 6.4771 | 9.1017   | 107.1167 |
| 71 | A | 3174.8028 | 6.4973 | 35.0697  | 31.5397  |
| 72 | A | 3182.7248 | 6.5263 | 19.4994  | 15.8384  |
| 73 | A | 3191.5181 | 6.5845 | 13.5533  | 237.8631 |
| 74 | A | 3193.6451 | 6.5975 | 9.5908   | 265.2578 |
| 75 | A | 3529.7809 | 7.7129 | 54.4169  | 153.3611 |
| 76 | A | 3550.5608 | 7.7827 | 11.0861  | 156.0531 |
| 77 | A | 3626.9857 | 8.4821 | 20.1347  | 33.6278  |

78 A 3645.0098 8.5950 16.8302 48.2791

ANL2\_09

| NM# | Symm | Wavenumber | Force Const | IR Intens | Raman Activ |
|-----|------|------------|-------------|-----------|-------------|
| 1   | A    | 15.3213    | 0.0007      | 0.1909    | 2.8241      |
| 2   | A    | 27.6697    | 0.0020      | 0.5107    | 2.1156      |
| 3   | A    | 36.9487    | 0.0036      | 1.2778    | 1.5772      |
| 4   | A    | 66.3021    | 0.0104      | 0.4442    | 5.9311      |
| 5   | A    | 68.7785    | 0.0109      | 0.2780    | 2.7445      |
| 6   | A    | 128.7779   | 0.0506      | 0.2235    | 9.5725      |
| 7   | A    | 232.3560   | 0.1133      | 8.4542    | 0.9430      |
| 8   | A    | 233.2854   | 0.1162      | 0.1612    | 2.0797      |
| 9   | A    | 319.6607   | 0.0651      | 28.1406   | 0.3478      |
| 10  | A    | 345.6331   | 0.0777      | 27.9958   | 0.7367      |
| 11  | A    | 389.0768   | 0.2425      | 3.4061    | 0.2425      |
| 12  | A    | 395.9115   | 0.2587      | 1.0115    | 1.2753      |
| 13  | A    | 419.6891   | 0.3082      | 0.6495    | 0.1905      |
| 14  | A    | 421.3626   | 0.3039      | 1.1940    | 0.2428      |
| 15  | A    | 508.6083   | 0.3813      | 2.0347    | 1.0221      |
| 16  | A    | 513.2844   | 0.3887      | 78.4290   | 1.3641      |
| 17  | A    | 539.2425   | 1.1219      | 5.2176    | 3.8548      |
| 18  | A    | 539.9797   | 1.0882      | 3.1273    | 3.6024      |
| 19  | A    | 636.4003   | 1.4856      | 2.1241    | 6.6395      |
| 20  | A    | 636.4885   | 1.4889      | 0.6893    | 0.8490      |
| 21  | A    | 670.3011   | 0.3648      | 187.6802  | 6.2781      |
| 22  | A    | 701.1268   | 0.6524      | 41.2010   | 0.8015      |
| 23  | A    | 706.8465   | 0.5404      | 40.5932   | 0.1967      |
| 24  | A    | 718.2496   | 0.3818      | 202.0794  | 7.4398      |
| 25  | A    | 766.7485   | 0.6390      | 170.9257  | 1.9418      |
| 26  | A    | 772.7277   | 0.6502      | 107.2846  | 3.8054      |
| 27  | A    | 830.9833   | 0.6021      | 0.7648    | 3.2728      |
| 28  | A    | 833.0387   | 0.9816      | 5.9626    | 15.4100     |
| 29  | A    | 835.5090   | 0.5648      | 1.6340    | 1.1529      |
| 30  | A    | 840.6862   | 1.3471      | 14.8478   | 31.2073     |
| 31  | A    | 887.9145   | 0.7107      | 25.2097   | 1.3946      |
| 32  | A    | 897.9511   | 0.7058      | 9.4357    | 0.1281      |
| 33  | A    | 970.0814   | 0.7482      | 0.1772    | 0.0393      |
| 34  | A    | 972.4661   | 0.7492      | 0.2359    | 0.0153      |
| 35  | A    | 984.8605   | 0.7198      | 0.1487    | 0.3887      |
| 36  | A    | 989.9506   | 0.7362      | 0.6756    | 0.1902      |
| 37  | A    | 1014.4067  | 3.5622      | 1.4160    | 44.0234     |
| 38  | A    | 1015.7385  | 3.5985      | 0.8078    | 19.5983     |
| 39  | A    | 1048.0823  | 1.3690      | 4.1858    | 15.7306     |
| 40  | A    | 1049.0770  | 1.3811      | 3.5489    | 21.1749     |
| 41  | A    | 1073.7267  | 1.0850      | 4.1983    | 0.4070      |
| 42  | A    | 1080.2979  | 1.1278      | 6.5870    | 0.3489      |
| 43  | A    | 1141.5212  | 0.9631      | 2.4399    | 1.4141      |
| 44  | A    | 1154.4548  | 0.9765      | 1.7889    | 1.4061      |
| 45  | A    | 1178.5743  | 0.8955      | 1.1413    | 3.9417      |
| 46  | A    | 1180.1410  | 0.9010      | 1.0887    | 3.6612      |
| 47  | A    | 1198.6407  | 0.9534      | 9.1872    | 2.5732      |
| 48  | A    | 1202.2906  | 0.9600      | 9.4714    | 2.1002      |
| 49  | A    | 1288.5616  | 3.2045      | 47.5436   | 10.6430     |
| 50  | A    | 1308.0958  | 3.2232      | 48.9104   | 18.0244     |
| 51  | A    | 1350.1365  | 5.6932      | 4.9748    | 0.8762      |
| 52  | A    | 1354.1125  | 4.6596      | 6.5908    | 0.3345      |
| 53  | A    | 1369.5149  | 1.4281      | 0.0495    | 0.1605      |
| 54  | A    | 1370.4544  | 1.5020      | 1.0028    | 0.2486      |
| 55  | A    | 1501.1262  | 3.0627      | 2.1834    | 0.7821      |
| 56  | A    | 1501.3825  | 3.0623      | 2.9362    | 2.0607      |
| 57  | A    | 1530.2938  | 3.2174      | 51.9994   | 1.9121      |
| 58  | A    | 1531.1602  | 3.3110      | 49.3716   | 1.3968      |
| 59  | A    | 1626.2041  | 8.6296      | 4.7353    | 3.6898      |
| 60  | A    | 1630.1831  | 8.2603      | 3.7621    | 7.8311      |
| 61  | A    | 1643.3650  | 4.7140      | 32.8251   | 29.1299     |
| 62  | A    | 1647.5310  | 5.5679      | 49.8719   | 15.7697     |
| 63  | A    | 1659.5862  | 2.4828      | 110.7402  | 22.1272     |
| 64  | A    | 1679.9557  | 1.9906      | 72.1333   | 10.3030     |

|    |   |           |        |         |          |
|----|---|-----------|--------|---------|----------|
| 65 | A | 3152.9251 | 6.3681 | 9.5719  | 58.3828  |
| 66 | A | 3154.9284 | 6.3649 | 12.7755 | 6.6270   |
| 67 | A | 3158.0660 | 6.3876 | 0.1687  | 105.5293 |
| 68 | A | 3166.5805 | 6.4185 | 0.2289  | 60.4227  |
| 69 | A | 3171.2644 | 6.4638 | 8.1690  | 123.0203 |
| 70 | A | 3174.1883 | 6.4771 | 9.1443  | 107.0616 |
| 71 | A | 3174.8090 | 6.4973 | 35.0592 | 31.5318  |
| 72 | A | 3182.7389 | 6.5263 | 19.4750 | 15.8535  |
| 73 | A | 3191.5132 | 6.5845 | 13.5474 | 237.8874 |
| 74 | A | 3193.6432 | 6.5975 | 9.5854  | 265.3641 |
| 75 | A | 3529.3923 | 7.7115 | 54.8733 | 153.2681 |
| 76 | A | 3550.7689 | 7.7835 | 11.1194 | 156.3930 |
| 77 | A | 3626.7392 | 8.4806 | 20.2131 | 33.7405  |
| 78 | A | 3645.3546 | 8.5969 | 16.9045 | 48.2469  |

-----  
ANL2\_10

| NM# | Symm | Wavenumber | Force Const | IR Intens | Raman Activ |
|-----|------|------------|-------------|-----------|-------------|
| 1   | A    | 15.3213    | 0.0007      | 0.1909    | 2.8240      |
| 2   | A    | 27.6697    | 0.0020      | 0.5107    | 2.1157      |
| 3   | A    | 36.9487    | 0.0036      | 1.2778    | 1.5772      |
| 4   | A    | 66.3023    | 0.0104      | 0.4442    | 5.9311      |
| 5   | A    | 68.7784    | 0.0109      | 0.2780    | 2.7445      |
| 6   | A    | 128.7777   | 0.0506      | 0.2235    | 9.5724      |
| 7   | A    | 232.3559   | 0.1133      | 8.4542    | 0.9430      |
| 8   | A    | 233.2855   | 0.1162      | 0.1612    | 2.0797      |
| 9   | A    | 319.6609   | 0.0651      | 28.1404   | 0.3478      |
| 10  | A    | 345.6330   | 0.0777      | 27.9959   | 0.7367      |
| 11  | A    | 389.0768   | 0.2425      | 3.4061    | 0.2425      |
| 12  | A    | 395.9117   | 0.2587      | 1.0115    | 1.2753      |
| 13  | A    | 419.6891   | 0.3082      | 0.6495    | 0.1905      |
| 14  | A    | 421.3626   | 0.3039      | 1.1940    | 0.2428      |
| 15  | A    | 508.6084   | 0.3813      | 2.0348    | 1.0221      |
| 16  | A    | 513.2844   | 0.3887      | 78.4284   | 1.3641      |
| 17  | A    | 539.2425   | 1.1219      | 5.2176    | 3.8548      |
| 18  | A    | 539.9796   | 1.0882      | 3.1273    | 3.6024      |
| 19  | A    | 636.4003   | 1.4856      | 2.1238    | 6.6395      |
| 20  | A    | 636.4886   | 1.4889      | 0.6894    | 0.8490      |
| 21  | A    | 670.3027   | 0.3648      | 187.6798  | 6.2781      |
| 22  | A    | 701.1269   | 0.6524      | 41.1973   | 0.8015      |
| 23  | A    | 706.8465   | 0.5404      | 40.5935   | 0.1967      |
| 24  | A    | 718.2507   | 0.3818      | 202.0779  | 7.4398      |
| 25  | A    | 766.7487   | 0.6390      | 170.9241  | 1.9418      |
| 26  | A    | 772.7282   | 0.6502      | 107.2909  | 3.8055      |
| 27  | A    | 830.9833   | 0.6021      | 0.7648    | 3.2731      |
| 28  | A    | 833.0387   | 0.9815      | 5.9628    | 15.4098     |
| 29  | A    | 835.5090   | 0.5648      | 1.6339    | 1.1529      |
| 30  | A    | 840.6863   | 1.3471      | 14.8484   | 31.2074     |
| 31  | A    | 887.9146   | 0.7107      | 25.2101   | 1.3947      |
| 32  | A    | 897.9512   | 0.7058      | 9.4357    | 0.1281      |
| 33  | A    | 970.0815   | 0.7482      | 0.1772    | 0.0393      |
| 34  | A    | 972.4662   | 0.7492      | 0.2359    | 0.0153      |
| 35  | A    | 984.8605   | 0.7198      | 0.1487    | 0.3887      |
| 36  | A    | 989.9507   | 0.7362      | 0.6756    | 0.1902      |
| 37  | A    | 1014.4067  | 3.5622      | 1.4160    | 44.0236     |
| 38  | A    | 1015.7385  | 3.5985      | 0.8077    | 19.5981     |
| 39  | A    | 1048.0823  | 1.3690      | 4.1858    | 15.7306     |
| 40  | A    | 1049.0769  | 1.3811      | 3.5489    | 21.1749     |
| 41  | A    | 1073.7269  | 1.0850      | 4.1984    | 0.4070      |
| 42  | A    | 1080.2980  | 1.1278      | 6.5871    | 0.3489      |
| 43  | A    | 1141.5213  | 0.9631      | 2.4399    | 1.4141      |
| 44  | A    | 1154.4551  | 0.9765      | 1.7889    | 1.4061      |
| 45  | A    | 1178.5743  | 0.8955      | 1.1413    | 3.9417      |
| 46  | A    | 1180.1410  | 0.9010      | 1.0887    | 3.6612      |
| 47  | A    | 1198.6407  | 0.9534      | 9.1872    | 2.5732      |
| 48  | A    | 1202.2906  | 0.9600      | 9.4714    | 2.1002      |
| 49  | A    | 1288.5612  | 3.2045      | 47.5435   | 10.6430     |
| 50  | A    | 1308.0956  | 3.2232      | 48.9102   | 18.0244     |
| 51  | A    | 1350.1365  | 5.6932      | 4.9748    | 0.8762      |



|    |   |           |        |          |          |
|----|---|-----------|--------|----------|----------|
| 52 | A | 1354.1125 | 4.6596 | 6.5908   | 0.3345   |
| 53 | A | 1369.5149 | 1.4281 | 0.0495   | 0.1605   |
| 54 | A | 1370.4545 | 1.5020 | 1.0029   | 0.2486   |
| 55 | A | 1501.1262 | 3.0627 | 2.1834   | 0.7821   |
| 56 | A | 1501.3826 | 3.0623 | 2.9363   | 2.0607   |
| 57 | A | 1530.2937 | 3.2174 | 51.9994  | 1.9121   |
| 58 | A | 1531.1602 | 3.3110 | 49.3713  | 1.3967   |
| 59 | A | 1626.2042 | 8.6296 | 4.7352   | 3.6899   |
| 60 | A | 1630.1832 | 8.2603 | 3.7620   | 7.8311   |
| 61 | A | 1643.3650 | 4.7140 | 32.8251  | 29.1300  |
| 62 | A | 1647.5310 | 5.5679 | 49.8719  | 15.7697  |
| 63 | A | 1659.5861 | 2.4828 | 110.7400 | 22.1272  |
| 64 | A | 1679.9558 | 1.9906 | 72.1327  | 10.3029  |
| 65 | A | 3152.9251 | 6.3681 | 9.5720   | 58.3828  |
| 66 | A | 3154.9284 | 6.3649 | 12.7755  | 6.6270   |
| 67 | A | 3158.0660 | 6.3876 | 0.1687   | 105.5292 |
| 68 | A | 3166.5806 | 6.4185 | 0.2289   | 60.4234  |
| 69 | A | 3171.2644 | 6.4638 | 8.1689   | 123.0205 |
| 70 | A | 3174.1884 | 6.4771 | 9.1442   | 107.0590 |
| 71 | A | 3174.8090 | 6.4973 | 35.0595  | 31.5335  |
| 72 | A | 3182.7391 | 6.5263 | 19.4748  | 15.8536  |
| 73 | A | 3191.5132 | 6.5845 | 13.5474  | 237.8870 |
| 74 | A | 3193.6432 | 6.5975 | 9.5854   | 265.3648 |
| 75 | A | 3529.3919 | 7.7115 | 54.8740  | 153.2687 |
| 76 | A | 3550.7684 | 7.7835 | 11.1194  | 156.3927 |
| 77 | A | 3626.7388 | 8.4806 | 20.2134  | 33.7407  |
| 78 | A | 3645.3540 | 8.5969 | 16.9044  | 48.2468  |

-----

ANL2\_11

| NM# | Symm | Wavenumber | Force Const | IR Intens | Raman Activ |
|-----|------|------------|-------------|-----------|-------------|
| 1   | A    | 7.9210     | 0.0001      | 0.3980    | 8.2021      |
| 2   | A    | 30.1358    | 0.0021      | 0.3266    | 6.5250      |
| 3   | A    | 35.8132    | 0.0040      | 0.0062    | 3.5232      |
| 4   | A    | 55.8549    | 0.0085      | 0.0499    | 0.6729      |
| 5   | A    | 65.6995    | 0.0107      | 0.5339    | 0.6943      |
| 6   | A    | 109.4388   | 0.0374      | 1.5483    | 2.7722      |
| 7   | A    | 221.9287   | 0.1023      | 1.9515    | 0.5632      |
| 8   | A    | 234.3831   | 0.1196      | 2.2666    | 0.9284      |
| 9   | A    | 306.6802   | 0.0585      | 17.2242   | 0.1979      |
| 10  | A    | 380.2881   | 0.1860      | 5.2836    | 0.6300      |
| 11  | A    | 398.2555   | 0.2206      | 3.9593    | 0.4838      |
| 12  | A    | 407.6983   | 0.1797      | 28.0726   | 1.8636      |
| 13  | A    | 414.8046   | 0.2778      | 2.1418    | 0.1460      |
| 14  | A    | 422.2255   | 0.2261      | 16.9019   | 0.4966      |
| 15  | A    | 509.1508   | 0.3901      | 39.1207   | 0.2444      |
| 16  | A    | 517.4387   | 0.4024      | 12.6513   | 0.1474      |
| 17  | A    | 539.8296   | 1.0855      | 2.9545    | 5.0436      |
| 18  | A    | 540.1107   | 1.0737      | 0.9374    | 3.6788      |
| 19  | A    | 636.5688   | 1.5194      | 0.0985    | 3.0036      |
| 20  | A    | 637.4478   | 1.5124      | 0.9546    | 5.0905      |
| 21  | A    | 661.8198   | 0.3105      | 223.0399  | 4.4157      |
| 22  | A    | 695.1649   | 0.4628      | 171.3902  | 4.5746      |
| 23  | A    | 701.8474   | 0.4503      | 35.0768   | 1.2433      |
| 24  | A    | 703.0473   | 0.5225      | 27.4745   | 0.2025      |
| 25  | A    | 760.6230   | 0.6340      | 55.3384   | 1.2386      |
| 26  | A    | 769.9015   | 0.6410      | 131.2348  | 2.9333      |
| 27  | A    | 825.1742   | 0.5052      | 0.7616    | 0.6817      |
| 28  | A    | 831.5745   | 0.5267      | 0.7274    | 1.0506      |
| 29  | A    | 833.0228   | 1.5777      | 3.7024    | 19.7816     |
| 30  | A    | 835.4865   | 1.6448      | 2.0956    | 27.2331     |
| 31  | A    | 883.8452   | 0.7145      | 3.9493    | 0.3393      |
| 32  | A    | 894.9292   | 0.7060      | 14.4877   | 0.6758      |
| 33  | A    | 962.7917   | 0.7281      | 0.1474    | 0.0883      |
| 34  | A    | 973.0733   | 0.7570      | 0.0452    | 0.0345      |
| 35  | A    | 981.1463   | 0.7241      | 0.0186    | 0.3321      |
| 36  | A    | 991.6442   | 0.7387      | 0.1965    | 0.5855      |
| 37  | A    | 1013.1336  | 3.5544      | 4.4932    | 39.7500     |
| 38  | A    | 1016.6218  | 3.6253      | 0.5290    | 21.5423     |

|    |   |           |        |          |          |
|----|---|-----------|--------|----------|----------|
| 39 | A | 1048.4286 | 1.3847 | 3.8934   | 15.7373  |
| 40 | A | 1049.8169 | 1.3794 | 3.3923   | 21.6996  |
| 41 | A | 1071.8755 | 1.0768 | 4.5711   | 0.0726   |
| 42 | A | 1074.5744 | 1.0839 | 4.0246   | 0.1102   |
| 43 | A | 1139.7774 | 0.9602 | 2.1797   | 2.3443   |
| 44 | A | 1143.2581 | 0.9581 | 0.9104   | 3.7608   |
| 45 | A | 1177.7623 | 0.8933 | 2.0736   | 4.6978   |
| 46 | A | 1181.9961 | 0.9044 | 1.2080   | 3.5173   |
| 47 | A | 1200.9568 | 0.9577 | 20.2493  | 1.9384   |
| 48 | A | 1201.9777 | 0.9585 | 2.0927   | 2.7624   |
| 49 | A | 1286.4340 | 3.2091 | 32.6176  | 10.5822  |
| 50 | A | 1305.6603 | 3.2519 | 70.9676  | 15.0020  |
| 51 | A | 1350.3776 | 5.7085 | 4.6150   | 1.2092   |
| 52 | A | 1351.0862 | 5.7861 | 10.7245  | 1.9949   |
| 53 | A | 1368.3122 | 1.4213 | 0.0692   | 0.1795   |
| 54 | A | 1368.8982 | 1.4331 | 0.0660   | 0.1487   |
| 55 | A | 1499.6485 | 3.0906 | 2.1671   | 0.4799   |
| 56 | A | 1501.6342 | 3.0609 | 3.4852   | 1.3845   |
| 57 | A | 1530.4957 | 3.2255 | 20.8525  | 1.7330   |
| 58 | A | 1531.1690 | 3.2772 | 86.5363  | 1.9284   |
| 59 | A | 1624.3913 | 8.7662 | 1.5679   | 7.4527   |
| 60 | A | 1632.6002 | 9.0196 | 3.5904   | 4.1901   |
| 61 | A | 1644.2665 | 5.3577 | 28.3281  | 20.8073  |
| 62 | A | 1648.1252 | 5.8479 | 51.0518  | 21.1861  |
| 63 | A | 1660.6592 | 2.2694 | 94.2321  | 19.2885  |
| 64 | A | 1681.8492 | 1.9921 | 107.2328 | 14.8588  |
| 65 | A | 3147.5471 | 6.3431 | 13.3487  | 61.0024  |
| 66 | A | 3158.3482 | 6.3908 | 9.0394   | 43.7564  |
| 67 | A | 3161.5931 | 6.4058 | 3.9993   | 67.3729  |
| 68 | A | 3161.9387 | 6.4025 | 0.5698   | 82.3500  |
| 69 | A | 3169.7108 | 6.4653 | 33.0934  | 87.0823  |
| 70 | A | 3174.9870 | 6.4725 | 3.5529   | 127.7455 |
| 71 | A | 3181.9236 | 6.5247 | 21.2409  | 29.7533  |
| 72 | A | 3188.3976 | 6.5653 | 20.3424  | 184.1835 |
| 73 | A | 3196.3010 | 6.6073 | 8.8560   | 222.7976 |
| 74 | A | 3210.5504 | 6.6262 | 0.0832   | 238.3505 |
| 75 | A | 3508.8333 | 7.6509 | 231.9460 | 288.1428 |
| 76 | A | 3546.7204 | 7.7672 | 12.4269  | 161.6814 |
| 77 | A | 3638.8163 | 8.5629 | 16.4631  | 53.1067  |
| 78 | A | 3641.5189 | 8.5404 | 62.0541  | 91.7860  |

ANL2\_12

| NM# | Symm | Wavenumber | Force Const | IR Intens | Raman Activ |
|-----|------|------------|-------------|-----------|-------------|
| 1   | A    | 7.9284     | 0.0001      | 0.3978    | 8.2011      |
| 2   | A    | 30.1361    | 0.0021      | 0.3268    | 6.5255      |
| 3   | A    | 35.8122    | 0.0040      | 0.0062    | 3.5229      |
| 4   | A    | 55.8575    | 0.0085      | 0.0500    | 0.6737      |
| 5   | A    | 65.6962    | 0.0107      | 0.5337    | 0.6943      |
| 6   | A    | 109.4395   | 0.0374      | 1.5486    | 2.7721      |
| 7   | A    | 221.9291   | 0.1023      | 1.9515    | 0.5633      |
| 8   | A    | 234.3829   | 0.1196      | 2.2666    | 0.9284      |
| 9   | A    | 306.6766   | 0.0585      | 17.2171   | 0.1979      |
| 10  | A    | 380.2854   | 0.1860      | 5.2843    | 0.6299      |
| 11  | A    | 398.2557   | 0.2206      | 3.9542    | 0.4840      |
| 12  | A    | 407.6969   | 0.1797      | 28.0754   | 1.8631      |
| 13  | A    | 414.8045   | 0.2778      | 2.1405    | 0.1459      |
| 14  | A    | 422.2252   | 0.2261      | 16.8987   | 0.4965      |
| 15  | A    | 509.1508   | 0.3901      | 39.1219   | 0.2443      |
| 16  | A    | 517.4391   | 0.4024      | 12.6513   | 0.1473      |
| 17  | A    | 539.8294   | 1.0856      | 2.9542    | 5.0407      |
| 18  | A    | 540.1108   | 1.0737      | 0.9377    | 3.6816      |
| 19  | A    | 636.5687   | 1.5194      | 0.0985    | 3.0037      |
| 20  | A    | 637.4476   | 1.5124      | 0.9546    | 5.0901      |
| 21  | A    | 661.8145   | 0.3105      | 222.9980  | 4.4159      |
| 22  | A    | 695.1620   | 0.4627      | 171.4404  | 4.5764      |
| 23  | A    | 701.8470   | 0.4504      | 35.0528   | 1.2419      |
| 24  | A    | 703.0472   | 0.5225      | 27.4757   | 0.2026      |
| 25  | A    | 760.6221   | 0.6340      | 55.3355   | 1.2385      |

|    |   |           |        |          |          |
|----|---|-----------|--------|----------|----------|
| 26 | A | 769.9012  | 0.6410 | 131.2357 | 2.9332   |
| 27 | A | 825.1746  | 0.5052 | 0.7614   | 0.6818   |
| 28 | A | 831.5750  | 0.5267 | 0.7267   | 1.0492   |
| 29 | A | 833.0223  | 1.5778 | 3.7027   | 19.7852  |
| 30 | A | 835.4868  | 1.6448 | 2.0952   | 27.2312  |
| 31 | A | 883.8450  | 0.7145 | 3.9491   | 0.3392   |
| 32 | A | 894.9297  | 0.7060 | 14.4872  | 0.6756   |
| 33 | A | 962.7920  | 0.7281 | 0.1474   | 0.0883   |
| 34 | A | 973.0736  | 0.7570 | 0.0452   | 0.0345   |
| 35 | A | 981.1464  | 0.7241 | 0.0187   | 0.3320   |
| 36 | A | 991.6448  | 0.7387 | 0.1966   | 0.5854   |
| 37 | A | 1013.1334 | 3.5544 | 4.4935   | 39.7493  |
| 38 | A | 1016.6215 | 3.6253 | 0.5290   | 21.5420  |
| 39 | A | 1048.4278 | 1.3847 | 3.8934   | 15.7374  |
| 40 | A | 1049.8162 | 1.3794 | 3.3923   | 21.6997  |
| 41 | A | 1071.8752 | 1.0768 | 4.5692   | 0.0726   |
| 42 | A | 1074.5735 | 1.0838 | 4.0257   | 0.1102   |
| 43 | A | 1139.7772 | 0.9602 | 2.1794   | 2.3441   |
| 44 | A | 1143.2574 | 0.9581 | 0.9110   | 3.7609   |
| 45 | A | 1177.7619 | 0.8933 | 2.0738   | 4.6978   |
| 46 | A | 1181.9961 | 0.9044 | 1.2081   | 3.5172   |
| 47 | A | 1200.9570 | 0.9577 | 20.2507  | 1.9386   |
| 48 | A | 1201.9780 | 0.9585 | 2.0920   | 2.7624   |
| 49 | A | 1286.4344 | 3.2091 | 32.6169  | 10.5820  |
| 50 | A | 1305.6621 | 3.2519 | 70.9690  | 15.0024  |
| 51 | A | 1350.3773 | 5.7085 | 4.6147   | 1.2093   |
| 52 | A | 1351.0857 | 5.7860 | 10.7245  | 1.9944   |
| 53 | A | 1368.3121 | 1.4213 | 0.0692   | 0.1795   |
| 54 | A | 1368.8981 | 1.4331 | 0.0660   | 0.1488   |
| 55 | A | 1499.6484 | 3.0906 | 2.1668   | 0.4798   |
| 56 | A | 1501.6348 | 3.0609 | 3.4852   | 1.3846   |
| 57 | A | 1530.4952 | 3.2255 | 20.8517  | 1.7328   |
| 58 | A | 1531.1688 | 3.2772 | 86.5367  | 1.9289   |
| 59 | A | 1624.3900 | 8.7662 | 1.5682   | 7.4525   |
| 60 | A | 1632.5989 | 9.0196 | 3.5903   | 4.1901   |
| 61 | A | 1644.2670 | 5.3576 | 28.3284  | 20.8073  |
| 62 | A | 1648.1257 | 5.8475 | 51.0476  | 21.1845  |
| 63 | A | 1660.6588 | 2.2695 | 94.2317  | 19.2894  |
| 64 | A | 1681.8492 | 1.9921 | 107.2396 | 14.8584  |
| 65 | A | 3147.5450 | 6.3431 | 13.3497  | 61.0059  |
| 66 | A | 3158.3484 | 6.3908 | 9.0403   | 43.7424  |
| 67 | A | 3161.5893 | 6.4058 | 4.0020   | 67.3047  |
| 68 | A | 3161.9376 | 6.4025 | 0.5673   | 82.4290  |
| 69 | A | 3169.7099 | 6.4653 | 33.0926  | 87.0841  |
| 70 | A | 3174.9860 | 6.4725 | 3.5519   | 127.7425 |
| 71 | A | 3181.9228 | 6.5247 | 21.2410  | 29.7557  |
| 72 | A | 3188.3973 | 6.5653 | 20.3426  | 184.1791 |
| 73 | A | 3196.3001 | 6.6073 | 8.8559   | 222.7964 |
| 74 | A | 3210.5483 | 6.6262 | 0.0833   | 238.3504 |
| 75 | A | 3508.8360 | 7.6509 | 231.9617 | 288.1500 |
| 76 | A | 3546.7227 | 7.7672 | 12.4271  | 161.6803 |
| 77 | A | 3638.8190 | 8.5629 | 16.4632  | 53.1059  |
| 78 | A | 3641.5219 | 8.5404 | 62.0568  | 91.7857  |

ANL2\_13

| NM# | Symm | Wavenumber | Force Const | IR Intens | Raman Activ |
|-----|------|------------|-------------|-----------|-------------|
| 1   | A    | 15.3937    | 0.0006      | 2.0331    | 1.6087      |
| 2   | A    | 20.4568    | 0.0011      | 1.1224    | 3.4780      |
| 3   | A    | 29.3915    | 0.0025      | 0.8001    | 5.1301      |
| 4   | A    | 51.5870    | 0.0070      | 0.1811    | 4.4140      |
| 5   | A    | 69.6112    | 0.0104      | 0.0513    | 2.2512      |
| 6   | A    | 92.9714    | 0.0223      | 0.0888    | 6.5204      |
| 7   | A    | 223.4053   | 0.0869      | 15.9938   | 2.2629      |
| 8   | A    | 228.6460   | 0.1105      | 3.8863    | 2.1084      |
| 9   | A    | 292.3774   | 0.0536      | 19.3162   | 0.6657      |
| 10  | A    | 303.3873   | 0.0569      | 11.5924   | 0.2466      |
| 11  | A    | 345.0341   | 0.0960      | 263.4817  | 2.4597      |
| 12  | A    | 385.6917   | 0.2477      | 1.1632    | 0.3500      |

|    |   |           |        |          |          |
|----|---|-----------|--------|----------|----------|
| 13 | A | 389.4243  | 0.2623 | 3.1393   | 1.1366   |
| 14 | A | 418.1621  | 0.3048 | 0.0967   | 0.1009   |
| 15 | A | 421.5399  | 0.3124 | 1.3392   | 0.3064   |
| 16 | A | 504.6585  | 0.3499 | 78.1866  | 0.8017   |
| 17 | A | 514.2912  | 0.4235 | 4.3707   | 0.7445   |
| 18 | A | 538.6122  | 1.0885 | 4.8872   | 3.6208   |
| 19 | A | 540.6351  | 1.0175 | 0.3931   | 4.9136   |
| 20 | A | 609.2502  | 0.3083 | 194.8880 | 6.2254   |
| 21 | A | 636.5298  | 1.5066 | 1.2588   | 1.6529   |
| 22 | A | 636.8406  | 1.4592 | 2.6247   | 5.3104   |
| 23 | A | 699.1717  | 0.5658 | 16.3870  | 0.3803   |
| 24 | A | 704.3040  | 0.5635 | 42.0468  | 0.4327   |
| 25 | A | 758.7732  | 0.6100 | 130.1861 | 2.0078   |
| 26 | A | 759.3687  | 0.6014 | 9.8431   | 2.0902   |
| 27 | A | 825.7643  | 0.5086 | 0.8676   | 0.8280   |
| 28 | A | 831.1770  | 0.5672 | 1.5208   | 2.6392   |
| 29 | A | 834.4377  | 1.3337 | 4.2300   | 16.0086  |
| 30 | A | 837.2491  | 1.8977 | 4.5493   | 25.7545  |
| 31 | A | 880.0533  | 0.6945 | 9.9942   | 0.3023   |
| 32 | A | 891.7929  | 0.6952 | 13.3669  | 0.1710   |
| 33 | A | 965.5552  | 0.7310 | 0.3227   | 0.1177   |
| 34 | A | 967.7289  | 0.7423 | 0.3159   | 0.0904   |
| 35 | A | 982.7152  | 0.7162 | 0.0255   | 0.2190   |
| 36 | A | 983.2649  | 0.7219 | 1.3473   | 0.1844   |
| 37 | A | 1012.3480 | 3.5921 | 3.4446   | 36.9717  |
| 38 | A | 1014.4432 | 3.6052 | 1.4958   | 26.0693  |
| 39 | A | 1048.5545 | 1.3753 | 3.7362   | 8.0468   |
| 40 | A | 1048.7421 | 1.3735 | 3.2149   | 28.6726  |
| 41 | A | 1053.6940 | 1.0117 | 1.0357   | 0.1542   |
| 42 | A | 1071.6540 | 1.0790 | 3.9547   | 0.5364   |
| 43 | A | 1130.2136 | 0.9731 | 5.3480   | 1.6946   |
| 44 | A | 1140.2727 | 0.9611 | 2.6909   | 2.0768   |
| 45 | A | 1178.0829 | 0.8952 | 1.4142   | 4.4692   |
| 46 | A | 1178.9856 | 0.8947 | 1.2604   | 3.1376   |
| 47 | A | 1200.7387 | 0.9572 | 10.8555  | 1.8455   |
| 48 | A | 1201.3209 | 0.9586 | 12.6972  | 2.6875   |
| 49 | A | 1296.7345 | 3.2070 | 50.6847  | 14.7365  |
| 50 | A | 1317.5480 | 3.1726 | 57.3428  | 12.4130  |
| 51 | A | 1351.6348 | 5.9293 | 8.0674   | 0.9401   |
| 52 | A | 1352.1806 | 6.3308 | 5.8601   | 0.1802   |
| 53 | A | 1366.7399 | 1.4225 | 0.1148   | 0.3177   |
| 54 | A | 1368.1239 | 1.4249 | 0.0093   | 0.1149   |
| 55 | A | 1499.5907 | 3.1240 | 1.9521   | 1.9983   |
| 56 | A | 1500.7821 | 3.0890 | 1.1953   | 0.6254   |
| 57 | A | 1530.6151 | 3.2571 | 44.9843  | 1.7797   |
| 58 | A | 1533.0558 | 3.3203 | 61.9905  | 2.6756   |
| 59 | A | 1622.8889 | 8.8420 | 4.3895   | 3.3981   |
| 60 | A | 1628.3983 | 8.0334 | 4.6415   | 6.7102   |
| 61 | A | 1642.3419 | 3.5701 | 18.3171  | 17.2655  |
| 62 | A | 1644.4273 | 3.6195 | 6.7458   | 3.4078   |
| 63 | A | 1659.6016 | 2.6747 | 114.7671 | 26.0421  |
| 64 | A | 1661.0508 | 2.7913 | 193.4126 | 33.8060  |
| 65 | A | 3150.5555 | 6.3542 | 10.6036  | 54.8417  |
| 66 | A | 3155.5566 | 6.3669 | 11.8966  | 6.9182   |
| 67 | A | 3158.7784 | 6.3917 | 0.4103   | 114.5995 |
| 68 | A | 3162.3079 | 6.4003 | 0.1677   | 69.5745  |
| 69 | A | 3170.6859 | 6.4646 | 22.4603  | 103.2231 |
| 70 | A | 3172.7797 | 6.4715 | 8.9499   | 117.8387 |
| 71 | A | 3175.6283 | 6.5008 | 27.7403  | 17.7448  |
| 72 | A | 3180.4573 | 6.5141 | 19.8955  | 19.3968  |
| 73 | A | 3190.2543 | 6.5829 | 11.6257  | 232.5054 |
| 74 | A | 3192.3156 | 6.5871 | 12.1025  | 269.3392 |
| 75 | A | 3560.4530 | 7.8229 | 9.3998   | 183.4542 |
| 76 | A | 3598.7826 | 7.9839 | 29.4213  | 165.6382 |
| 77 | A | 3659.1268 | 8.6674 | 15.3617  | 49.0092  |
| 78 | A | 3707.3325 | 8.9214 | 20.3848  | 42.6374  |

-----  
ANL2\_14  
-----

| NM# | Symm | Wavenumber | Force Const | IR Intens | Raman Activ |
|-----|------|------------|-------------|-----------|-------------|
|-----|------|------------|-------------|-----------|-------------|

|    |   |           |        |          |          |
|----|---|-----------|--------|----------|----------|
| 1  | A | 12.3916   | 0.0004 | 0.5002   | 0.0000   |
| 2  | A | 36.4828   | 0.0038 | 0.0000   | 6.7216   |
| 3  | A | 46.9066   | 0.0070 | 0.0000   | 4.1302   |
| 4  | A | 53.8455   | 0.0070 | 1.4373   | 0.0000   |
| 5  | A | 59.2135   | 0.0076 | 0.9063   | 0.0000   |
| 6  | A | 106.1410  | 0.0289 | 0.0000   | 10.5142  |
| 7  | A | 228.0582  | 0.1118 | 0.0000   | 1.7171   |
| 8  | A | 230.0496  | 0.1084 | 11.1254  | 0.0000   |
| 9  | A | 280.1550  | 0.0480 | 42.3048  | 0.0000   |
| 10 | A | 281.1536  | 0.0484 | 0.0001   | 0.3127   |
| 11 | A | 384.1142  | 0.2577 | 0.4244   | 0.0000   |
| 12 | A | 384.1433  | 0.2575 | 0.0000   | 1.1768   |
| 13 | A | 412.7637  | 0.2931 | 0.6809   | 0.0000   |
| 14 | A | 417.6921  | 0.3004 | 0.0000   | 0.1747   |
| 15 | A | 499.6744  | 0.3263 | 0.0000   | 1.5541   |
| 16 | A | 504.5674  | 0.3406 | 131.7666 | 0.0000   |
| 17 | A | 538.0630  | 1.0719 | 0.0000   | 5.6470   |
| 18 | A | 538.8462  | 1.0972 | 7.2179   | 0.0000   |
| 19 | A | 593.8535  | 0.2938 | 0.0003   | 14.6849  |
| 20 | A | 603.3890  | 0.2995 | 369.3771 | 0.0000   |
| 21 | A | 636.0335  | 1.5152 | 0.4919   | 0.0000   |
| 22 | A | 637.1509  | 1.5102 | 0.0000   | 5.0343   |
| 23 | A | 698.1139  | 0.5269 | 66.6982  | 0.0000   |
| 24 | A | 698.9045  | 0.5464 | 0.0000   | 0.2480   |
| 25 | A | 757.5247  | 0.6417 | 151.9413 | 0.0000   |
| 26 | A | 761.3120  | 0.6283 | 0.0000   | 4.5258   |
| 27 | A | 821.2756  | 0.5053 | 0.0000   | 1.3283   |
| 28 | A | 823.6237  | 0.5046 | 2.3217   | 0.0000   |
| 29 | A | 833.7390  | 1.7484 | 0.0000   | 38.9324  |
| 30 | A | 833.9841  | 1.8083 | 6.3983   | 0.0000   |
| 31 | A | 882.9873  | 0.6992 | 0.0000   | 1.2940   |
| 32 | A | 883.9340  | 0.6934 | 20.0452  | 0.0000   |
| 33 | A | 965.4181  | 0.7438 | 0.6891   | 0.0000   |
| 34 | A | 966.5333  | 0.7442 | 0.0000   | 0.4488   |
| 35 | A | 985.5058  | 0.7333 | 0.0000   | 1.3381   |
| 36 | A | 985.7318  | 0.7331 | 0.7027   | 0.0000   |
| 37 | A | 1015.1665 | 3.5239 | 2.7067   | 0.0000   |
| 38 | A | 1015.3184 | 3.5280 | 0.0000   | 50.6312  |
| 39 | A | 1049.7729 | 1.3771 | 0.0000   | 33.2287  |
| 40 | A | 1050.2715 | 1.3737 | 5.3423   | 0.0000   |
| 41 | A | 1067.6465 | 1.0588 | 0.0000   | 0.1618   |
| 42 | A | 1067.8654 | 1.0585 | 5.5844   | 0.0000   |
| 43 | A | 1136.9479 | 0.9576 | 6.1444   | 0.0020   |
| 44 | A | 1136.9676 | 0.9566 | 0.0032   | 3.8988   |
| 45 | A | 1178.5384 | 0.8942 | 0.0000   | 6.8677   |
| 46 | A | 1178.7567 | 0.8954 | 2.8708   | 0.0000   |
| 47 | A | 1199.7217 | 0.9533 | 14.4514  | 0.0000   |
| 48 | A | 1200.6657 | 0.9562 | 0.0000   | 5.1104   |
| 49 | A | 1296.6870 | 3.2218 | 104.3964 | 0.0000   |
| 50 | A | 1297.6773 | 3.1996 | 0.0001   | 25.3198  |
| 51 | A | 1351.3767 | 6.0224 | 11.6762  | 0.0000   |
| 52 | A | 1353.4645 | 6.0216 | 0.0000   | 3.3297   |
| 53 | A | 1366.4675 | 1.4228 | 0.0696   | 0.0000   |
| 54 | A | 1366.5206 | 1.4278 | 0.0000   | 0.2627   |
| 55 | A | 1500.3066 | 3.1055 | 3.5479   | 0.0000   |
| 56 | A | 1501.0792 | 3.1101 | 0.0000   | 2.9824   |
| 57 | A | 1530.6909 | 3.2757 | 0.0000   | 2.3664   |
| 58 | A | 1531.5877 | 3.2774 | 102.7579 | 0.0000   |
| 59 | A | 1629.7949 | 9.0129 | 8.5700   | 0.0000   |
| 60 | A | 1629.8974 | 8.9665 | 0.0000   | 5.8934   |
| 61 | A | 1644.5911 | 4.1262 | 0.0000   | 22.4327  |
| 62 | A | 1645.8422 | 4.1056 | 27.8104  | 0.0000   |
| 63 | A | 1661.5586 | 2.4466 | 277.7600 | 0.0000   |
| 64 | A | 1662.3582 | 2.4386 | 0.0000   | 48.9290  |
| 65 | A | 3149.5512 | 6.3509 | 21.4574  | 0.0183   |
| 66 | A | 3149.5603 | 6.3510 | 0.0032   | 121.4232 |
| 67 | A | 3163.4793 | 6.4101 | 15.6588  | 0.0002   |
| 68 | A | 3163.6388 | 6.4118 | 0.0000   | 54.0100  |
| 69 | A | 3168.6813 | 6.4558 | 0.0000   | 277.4664 |
| 70 | A | 3168.8912 | 6.4566 | 23.8361  | 0.0001   |

|    |   |           |        |         |          |
|----|---|-----------|--------|---------|----------|
| 71 | A | 3181.0938 | 6.5112 | 0.0000  | 61.9109  |
| 72 | A | 3181.3465 | 6.5117 | 42.3431 | 0.0000   |
| 73 | A | 3195.6318 | 6.6033 | 0.0000  | 354.5824 |
| 74 | A | 3195.8869 | 6.6038 | 18.1135 | 0.0001   |
| 75 | A | 3565.1075 | 7.8439 | 28.2990 | 1.0946   |
| 76 | A | 3565.1616 | 7.8443 | 0.0805  | 385.2400 |
| 77 | A | 3662.0341 | 8.6803 | 3.5446  | 95.1226  |
| 78 | A | 3662.0449 | 8.6804 | 23.3209 | 14.4588  |

ANL2\_15

| NM# | Symm | Wavenumber | Force Const | IR Intens | Raman Activ |
|-----|------|------------|-------------|-----------|-------------|
| 1   | A    | 12.3908    | 0.0004      | 0.5002    | 0.0000      |
| 2   | A    | 36.4810    | 0.0038      | 0.0000    | 6.7214      |
| 3   | A    | 46.9055    | 0.0070      | 0.0000    | 4.1303      |
| 4   | A    | 53.8440    | 0.0070      | 1.4375    | 0.0000      |
| 5   | A    | 59.2124    | 0.0076      | 0.9061    | 0.0000      |
| 6   | A    | 106.1405   | 0.0289      | 0.0000    | 10.5140     |
| 7   | A    | 228.0584   | 0.1118      | 0.0000    | 1.7172      |
| 8   | A    | 230.0488   | 0.1084      | 11.1254   | 0.0000      |
| 9   | A    | 280.1561   | 0.0480      | 42.3054   | 0.0000      |
| 10  | A    | 281.1549   | 0.0484      | 0.0000    | 0.3127      |
| 11  | A    | 384.1143   | 0.2577      | 0.4244    | 0.0000      |
| 12  | A    | 384.1434   | 0.2575      | 0.0000    | 1.1768      |
| 13  | A    | 412.7636   | 0.2931      | 0.6809    | 0.0000      |
| 14  | A    | 417.6918   | 0.3004      | 0.0000    | 0.1747      |
| 15  | A    | 499.6742   | 0.3263      | 0.0000    | 1.5541      |
| 16  | A    | 504.5673   | 0.3406      | 131.7684  | 0.0000      |
| 17  | A    | 538.0630   | 1.0719      | 0.0000    | 5.6470      |
| 18  | A    | 538.8463   | 1.0972      | 7.2176    | 0.0000      |
| 19  | A    | 593.8516   | 0.2938      | 0.0001    | 14.6848     |
| 20  | A    | 603.3875   | 0.2995      | 369.3746  | 0.0000      |
| 21  | A    | 636.0336   | 1.5152      | 0.4919    | 0.0000      |
| 22  | A    | 637.1509   | 1.5102      | 0.0000    | 5.0343      |
| 23  | A    | 698.1140   | 0.5269      | 66.6985   | 0.0000      |
| 24  | A    | 698.9044   | 0.5464      | 0.0000    | 0.2480      |
| 25  | A    | 757.5243   | 0.6417      | 151.9404  | 0.0000      |
| 26  | A    | 761.3117   | 0.6283      | 0.0000    | 4.5258      |
| 27  | A    | 821.2757   | 0.5053      | 0.0000    | 1.3282      |
| 28  | A    | 823.6236   | 0.5046      | 2.3215    | 0.0000      |
| 29  | A    | 833.7391   | 1.7484      | 0.0000    | 38.9324     |
| 30  | A    | 833.9842   | 1.8083      | 6.3983    | 0.0000      |
| 31  | A    | 882.9872   | 0.6992      | 0.0000    | 1.2938      |
| 32  | A    | 883.9339   | 0.6934      | 20.0457   | 0.0000      |
| 33  | A    | 965.4181   | 0.7438      | 0.6892    | 0.0000      |
| 34  | A    | 966.5334   | 0.7442      | 0.0000    | 0.4488      |
| 35  | A    | 985.5056   | 0.7333      | 0.0000    | 1.3382      |
| 36  | A    | 985.7316   | 0.7331      | 0.7026    | 0.0000      |
| 37  | A    | 1015.1666  | 3.5239      | 2.7067    | 0.0001      |
| 38  | A    | 1015.3184  | 3.5280      | 0.0000    | 50.6308     |
| 39  | A    | 1049.7733  | 1.3771      | 0.0000    | 33.2290     |
| 40  | A    | 1050.2719  | 1.3737      | 5.3423    | 0.0000      |
| 41  | A    | 1067.6466  | 1.0588      | 0.0000    | 0.1618      |
| 42  | A    | 1067.8655  | 1.0585      | 5.5844    | 0.0000      |
| 43  | A    | 1136.9479  | 0.9576      | 6.1451    | 0.0016      |
| 44  | A    | 1136.9676  | 0.9566      | 0.0025    | 3.8992      |
| 45  | A    | 1178.5385  | 0.8942      | 0.0000    | 6.8677      |
| 46  | A    | 1178.7568  | 0.8954      | 2.8708    | 0.0000      |
| 47  | A    | 1199.7220  | 0.9533      | 14.4515   | 0.0000      |
| 48  | A    | 1200.6659  | 0.9562      | 0.0000    | 5.1104      |
| 49  | A    | 1296.6876  | 3.2218      | 104.3959  | 0.0000      |
| 50  | A    | 1297.6777  | 3.1996      | 0.0000    | 25.3199     |
| 51  | A    | 1351.3771  | 6.0224      | 11.6760   | 0.0000      |
| 52  | A    | 1353.4647  | 6.0216      | 0.0000    | 3.3295      |
| 53  | A    | 1366.4675  | 1.4228      | 0.0696    | 0.0000      |
| 54  | A    | 1366.5207  | 1.4278      | 0.0000    | 0.2627      |
| 55  | A    | 1500.3067  | 3.1055      | 3.5479    | 0.0000      |
| 56  | A    | 1501.0793  | 3.1101      | 0.0000    | 2.9823      |
| 57  | A    | 1530.6912  | 3.2757      | 0.0000    | 2.3665      |

|    |   |           |        |          |          |
|----|---|-----------|--------|----------|----------|
| 58 | A | 1531.5880 | 3.2774 | 102.7575 | 0.0000   |
| 59 | A | 1629.7951 | 9.0129 | 8.5702   | 0.0001   |
| 60 | A | 1629.8976 | 8.9665 | 0.0002   | 5.8932   |
| 61 | A | 1644.5911 | 4.1261 | 0.0000   | 22.4326  |
| 62 | A | 1645.8424 | 4.1055 | 27.8085  | 0.0000   |
| 63 | A | 1661.5587 | 2.4466 | 277.7620 | 0.0000   |
| 64 | A | 1662.3583 | 2.4386 | 0.0000   | 48.9294  |
| 65 | A | 3149.5512 | 6.3509 | 21.4479  | 0.0716   |
| 66 | A | 3149.5602 | 6.3510 | 0.0126   | 121.3702 |
| 67 | A | 3163.4793 | 6.4101 | 15.6598  | 0.0000   |
| 68 | A | 3163.6387 | 6.4118 | 0.0000   | 54.0072  |
| 69 | A | 3168.6812 | 6.4558 | 0.0000   | 277.4698 |
| 70 | A | 3168.8911 | 6.4566 | 23.8364  | 0.0000   |
| 71 | A | 3181.0943 | 6.5112 | 0.0001   | 61.9159  |
| 72 | A | 3181.3469 | 6.5117 | 42.3419  | 0.0001   |
| 73 | A | 3195.6324 | 6.6033 | 0.0001   | 354.5780 |
| 74 | A | 3195.8875 | 6.6038 | 18.1138  | 0.0016   |
| 75 | A | 3565.1073 | 7.8439 | 28.3691  | 0.1389   |
| 76 | A | 3565.1611 | 7.8443 | 0.0102   | 386.1956 |
| 77 | A | 3662.0352 | 8.6803 | 0.7752   | 106.4196 |
| 78 | A | 3662.0436 | 8.6804 | 26.0904  | 3.1619   |

-----

ANL2\_16

| NM# | Symm | Wavenumber | Force Const | IR Intens | Raman Activ |
|-----|------|------------|-------------|-----------|-------------|
| 1   | A    | 15.3487    | 0.0007      | 0.1905    | 2.8260      |
| 2   | A    | 27.6344    | 0.0020      | 0.5097    | 2.1012      |
| 3   | A    | 36.9569    | 0.0036      | 1.2749    | 1.5744      |
| 4   | A    | 66.2112    | 0.0103      | 0.4425    | 5.9391      |
| 5   | A    | 68.7652    | 0.0109      | 0.2798    | 2.7296      |
| 6   | A    | 128.6497   | 0.0505      | 0.2217    | 9.5835      |
| 7   | A    | 232.3536   | 0.1135      | 8.4328    | 0.9529      |
| 8   | A    | 233.2505   | 0.1160      | 0.1747    | 2.0859      |
| 9   | A    | 319.5182   | 0.0650      | 28.1787   | 0.3480      |
| 10  | A    | 345.2827   | 0.0775      | 28.0721   | 0.7337      |
| 11  | A    | 389.0401   | 0.2427      | 3.3706    | 0.2416      |
| 12  | A    | 395.8289   | 0.2589      | 1.0024    | 1.2734      |
| 13  | A    | 419.6803   | 0.3082      | 0.6488    | 0.1890      |
| 14  | A    | 421.3628   | 0.3040      | 1.1850    | 0.2437      |
| 15  | A    | 508.6029   | 0.3813      | 2.0902    | 1.0296      |
| 16  | A    | 513.2830   | 0.3888      | 78.2857   | 1.3576      |
| 17  | A    | 539.2460   | 1.1219      | 5.2104    | 3.8622      |
| 18  | A    | 539.9729   | 1.0882      | 3.1244    | 3.5980      |
| 19  | A    | 636.4050   | 1.4905      | 1.9479    | 6.6099      |
| 20  | A    | 636.4923   | 1.4869      | 0.7574    | 0.8796      |
| 21  | A    | 671.0755   | 0.3658      | 187.2146  | 6.2645      |
| 22  | A    | 701.0697   | 0.6529      | 42.5899   | 0.8380      |
| 23  | A    | 706.8560   | 0.5396      | 40.3660   | 0.1973      |
| 24  | A    | 717.8704   | 0.3810      | 202.5006  | 7.4436      |
| 25  | A    | 766.8033   | 0.6395      | 173.4443  | 1.9468      |
| 26  | A    | 772.5858   | 0.6496      | 103.9817  | 3.7951      |
| 27  | A    | 830.9671   | 0.6000      | 0.7541    | 3.1962      |
| 28  | A    | 833.0559   | 0.9843      | 5.9726    | 15.4571     |
| 29  | A    | 835.5149   | 0.5654      | 1.6248    | 1.1689      |
| 30  | A    | 840.6497   | 1.3504      | 14.6734   | 31.2181     |
| 31  | A    | 887.8763   | 0.7106      | 25.0883   | 1.3824      |
| 32  | A    | 897.9615   | 0.7059      | 9.5192    | 0.1260      |
| 33  | A    | 970.0721   | 0.7482      | 0.1763    | 0.0389      |
| 34  | A    | 972.4673   | 0.7492      | 0.2361    | 0.0153      |
| 35  | A    | 984.8457   | 0.7198      | 0.1481    | 0.3866      |
| 36  | A    | 989.9429   | 0.7361      | 0.6759    | 0.1901      |
| 37  | A    | 1014.3961  | 3.5626      | 1.4248    | 43.8615     |
| 38  | A    | 1015.7446  | 3.5988      | 0.7977    | 19.7642     |
| 39  | A    | 1048.0850  | 1.3690      | 4.1869    | 15.7378     |
| 40  | A    | 1049.0763  | 1.3811      | 3.5468    | 21.1688     |
| 41  | A    | 1073.7673  | 1.0852      | 4.2012    | 0.4064      |
| 42  | A    | 1080.2408  | 1.1276      | 6.5750    | 0.3458      |
| 43  | A    | 1141.5619  | 0.9631      | 2.4379    | 1.4105      |
| 44  | A    | 1154.3499  | 0.9762      | 1.7792    | 1.4082      |

|    |   |           |        |          |          |
|----|---|-----------|--------|----------|----------|
| 45 | A | 1178.5728 | 0.8955 | 1.1432   | 3.9427   |
| 46 | A | 1180.1383 | 0.9010 | 1.0873   | 3.6587   |
| 47 | A | 1198.6557 | 0.9534 | 9.1927   | 2.5718   |
| 48 | A | 1202.2898 | 0.9600 | 9.4645   | 2.1014   |
| 49 | A | 1288.5367 | 3.2043 | 47.4419  | 10.6692  |
| 50 | A | 1308.1889 | 3.2231 | 48.9757  | 17.9949  |
| 51 | A | 1350.1443 | 5.6908 | 4.9653   | 0.8734   |
| 52 | A | 1354.1104 | 4.6669 | 6.5959   | 0.3328   |
| 53 | A | 1369.5163 | 1.4282 | 0.0505   | 0.1594   |
| 54 | A | 1370.4446 | 1.5013 | 0.9922   | 0.2480   |
| 55 | A | 1501.1235 | 3.0626 | 2.1889   | 0.7754   |
| 56 | A | 1501.3846 | 3.0627 | 2.9324   | 2.0679   |
| 57 | A | 1530.2945 | 3.2171 | 51.7631  | 1.9036   |
| 58 | A | 1531.1758 | 3.3116 | 49.5890  | 1.4074   |
| 59 | A | 1626.1842 | 8.6317 | 4.7241   | 3.6912   |
| 60 | A | 1630.1873 | 8.2634 | 3.7654   | 7.8302   |
| 61 | A | 1643.3921 | 4.7360 | 33.0102  | 29.2843  |
| 62 | A | 1647.5484 | 5.5791 | 49.7988  | 15.6732  |
| 63 | A | 1659.6611 | 2.4735 | 110.5024 | 22.0460  |
| 64 | A | 1679.9158 | 1.9912 | 72.3348  | 10.3373  |
| 65 | A | 3152.9386 | 6.3681 | 9.5633   | 58.3462  |
| 66 | A | 3154.9221 | 6.3648 | 12.7796  | 6.6228   |
| 67 | A | 3158.0610 | 6.3876 | 0.1689   | 105.5880 |
| 68 | A | 3166.5781 | 6.4185 | 0.2295   | 60.3623  |
| 69 | A | 3171.2644 | 6.4638 | 8.1755   | 123.0091 |
| 70 | A | 3174.1832 | 6.4771 | 9.1000   | 107.0796 |
| 71 | A | 3174.8009 | 6.4972 | 35.0743  | 31.5568  |
| 72 | A | 3182.7254 | 6.5263 | 19.4972  | 15.8397  |
| 73 | A | 3191.5166 | 6.5845 | 13.5528  | 237.8553 |
| 74 | A | 3193.6433 | 6.5975 | 9.5892   | 265.2674 |
| 75 | A | 3529.7911 | 7.7129 | 54.4122  | 153.3637 |
| 76 | A | 3550.5622 | 7.7827 | 11.0861  | 156.0470 |
| 77 | A | 3626.9952 | 8.4822 | 20.1345  | 33.6270  |
| 78 | A | 3645.0120 | 8.5951 | 16.8304  | 48.2792  |

-----  
ANL2\_17  
-----

| NM# | Symm | Wavenumber | Force Const | IR Intens | Raman Activ |
|-----|------|------------|-------------|-----------|-------------|
| 1   | A    | 15.3479    | 0.0007      | 0.1905    | 2.8261      |
| 2   | A    | 27.6343    | 0.0020      | 0.5097    | 2.1010      |
| 3   | A    | 36.9561    | 0.0036      | 1.2748    | 1.5744      |
| 4   | A    | 66.2105    | 0.0103      | 0.4425    | 5.9391      |
| 5   | A    | 68.7641    | 0.0109      | 0.2798    | 2.7297      |
| 6   | A    | 128.6498   | 0.0505      | 0.2217    | 9.5837      |
| 7   | A    | 232.3537   | 0.1135      | 8.4325    | 0.9530      |
| 8   | A    | 233.2502   | 0.1160      | 0.1748    | 2.0859      |
| 9   | A    | 319.5185   | 0.0650      | 28.1800   | 0.3480      |
| 10  | A    | 345.2858   | 0.0775      | 28.0720   | 0.7337      |
| 11  | A    | 389.0402   | 0.2427      | 3.3708    | 0.2416      |
| 12  | A    | 395.8286   | 0.2589      | 1.0023    | 1.2734      |
| 13  | A    | 419.6803   | 0.3082      | 0.6488    | 0.1890      |
| 14  | A    | 421.3626   | 0.3040      | 1.1851    | 0.2437      |
| 15  | A    | 508.6030   | 0.3813      | 2.0897    | 1.0295      |
| 16  | A    | 513.2829   | 0.3888      | 78.2838   | 1.3576      |
| 17  | A    | 539.2461   | 1.1219      | 5.2100    | 3.8622      |
| 18  | A    | 539.9730   | 1.0882      | 3.1242    | 3.5981      |
| 19  | A    | 636.4050   | 1.4905      | 1.9462    | 6.6094      |
| 20  | A    | 636.4923   | 1.4869      | 0.7579    | 0.8801      |
| 21  | A    | 671.0842   | 0.3658      | 187.2123  | 6.2644      |
| 22  | A    | 701.0699   | 0.6529      | 42.5763   | 0.8377      |
| 23  | A    | 706.8558   | 0.5396      | 40.3642   | 0.1973      |
| 24  | A    | 717.8723   | 0.3810      | 202.5043  | 7.4437      |
| 25  | A    | 766.8036   | 0.6395      | 173.4598  | 1.9468      |
| 26  | A    | 772.5859   | 0.6496      | 103.9811  | 3.7952      |
| 27  | A    | 830.9666   | 0.6000      | 0.7545    | 3.1942      |
| 28  | A    | 833.0561   | 0.9844      | 5.9721    | 15.4580     |
| 29  | A    | 835.5147   | 0.5654      | 1.6249    | 1.1695      |
| 30  | A    | 840.6499   | 1.3504      | 14.6740   | 31.2189     |
| 31  | A    | 887.8757   | 0.7106      | 25.0890   | 1.3824      |



|    |   |           |        |          |          |
|----|---|-----------|--------|----------|----------|
| 32 | A | 897.9613  | 0.7059 | 9.5197   | 0.1260   |
| 33 | A | 970.0717  | 0.7482 | 0.1763   | 0.0389   |
| 34 | A | 972.4668  | 0.7492 | 0.2360   | 0.0153   |
| 35 | A | 984.8451  | 0.7198 | 0.1481   | 0.3866   |
| 36 | A | 989.9424  | 0.7361 | 0.6759   | 0.1901   |
| 37 | A | 1014.3960 | 3.5626 | 1.4249   | 43.8590  |
| 38 | A | 1015.7447 | 3.5988 | 0.7976   | 19.7664  |
| 39 | A | 1048.0849 | 1.3690 | 4.1869   | 15.7381  |
| 40 | A | 1049.0762 | 1.3811 | 3.5468   | 21.1687  |
| 41 | A | 1073.7681 | 1.0852 | 4.2013   | 0.4064   |
| 42 | A | 1080.2408 | 1.1276 | 6.5749   | 0.3458   |
| 43 | A | 1141.5626 | 0.9631 | 2.4379   | 1.4105   |
| 44 | A | 1154.3499 | 0.9762 | 1.7792   | 1.4082   |
| 45 | A | 1178.5727 | 0.8955 | 1.1432   | 3.9428   |
| 46 | A | 1180.1381 | 0.9010 | 1.0872   | 3.6587   |
| 47 | A | 1198.6557 | 0.9534 | 9.1927   | 2.5718   |
| 48 | A | 1202.2895 | 0.9600 | 9.4643   | 2.1015   |
| 49 | A | 1288.5375 | 3.2043 | 47.4407  | 10.6693  |
| 50 | A | 1308.1903 | 3.2231 | 48.9756  | 17.9947  |
| 51 | A | 1350.1443 | 5.6908 | 4.9652   | 0.8734   |
| 52 | A | 1354.1102 | 4.6669 | 6.5960   | 0.3328   |
| 53 | A | 1369.5161 | 1.4282 | 0.0505   | 0.1594   |
| 54 | A | 1370.4446 | 1.5013 | 0.9922   | 0.2480   |
| 55 | A | 1501.1235 | 3.0626 | 2.1889   | 0.7753   |
| 56 | A | 1501.3846 | 3.0627 | 2.9323   | 2.0680   |
| 57 | A | 1530.2945 | 3.2171 | 51.7615  | 1.9035   |
| 58 | A | 1531.1761 | 3.3116 | 49.5907  | 1.4074   |
| 59 | A | 1626.1838 | 8.6317 | 4.7241   | 3.6912   |
| 60 | A | 1630.1871 | 8.2632 | 3.7654   | 7.8301   |
| 61 | A | 1643.3925 | 4.7363 | 33.0137  | 29.2867  |
| 62 | A | 1647.5487 | 5.5793 | 49.7982  | 15.6719  |
| 63 | A | 1659.6622 | 2.4734 | 110.4999 | 22.0452  |
| 64 | A | 1679.9169 | 1.9912 | 72.3351  | 10.3373  |
| 65 | A | 3152.9381 | 6.3681 | 9.5638   | 58.3504  |
| 66 | A | 3154.9234 | 6.3648 | 12.7799  | 6.6208   |
| 67 | A | 3158.0622 | 6.3876 | 0.1688   | 105.5895 |
| 68 | A | 3166.5792 | 6.4185 | 0.2295   | 60.3573  |
| 69 | A | 3171.2658 | 6.4638 | 8.1750   | 123.0131 |
| 70 | A | 3174.1844 | 6.4771 | 9.0986   | 107.0777 |
| 71 | A | 3174.8019 | 6.4972 | 35.0749  | 31.5583  |
| 72 | A | 3182.7265 | 6.5263 | 19.4976  | 15.8395  |
| 73 | A | 3191.5182 | 6.5845 | 13.5530  | 237.8524 |
| 74 | A | 3193.6446 | 6.5975 | 9.5895   | 265.2661 |
| 75 | A | 3529.7896 | 7.7129 | 54.4110  | 153.3647 |
| 76 | A | 3550.5591 | 7.7826 | 11.0858  | 156.0468 |
| 77 | A | 3626.9914 | 8.4822 | 20.1345  | 33.6264  |
| 78 | A | 3645.0074 | 8.5950 | 16.8301  | 48.2793  |

-----  
ANL2\_18

| NM# | Symm | Wavenumber | Force Const | IR Intens | Raman Activ |
|-----|------|------------|-------------|-----------|-------------|
| 1   | A    | 15.3487    | 0.0007      | 0.1906    | 2.8261      |
| 2   | A    | 27.6347    | 0.0020      | 0.5097    | 2.1011      |
| 3   | A    | 36.9566    | 0.0036      | 1.2748    | 1.5744      |
| 4   | A    | 66.2110    | 0.0103      | 0.4425    | 5.9392      |
| 5   | A    | 68.7648    | 0.0109      | 0.2798    | 2.7296      |
| 6   | A    | 128.6495   | 0.0505      | 0.2218    | 9.5835      |
| 7   | A    | 232.3536   | 0.1135      | 8.4327    | 0.9529      |
| 8   | A    | 233.2506   | 0.1160      | 0.1747    | 2.0860      |
| 9   | A    | 319.5178   | 0.0650      | 28.1793   | 0.3480      |
| 10  | A    | 345.2840   | 0.0775      | 28.0719   | 0.7337      |
| 11  | A    | 389.0402   | 0.2427      | 3.3706    | 0.2416      |
| 12  | A    | 395.8286   | 0.2589      | 1.0021    | 1.2734      |
| 13  | A    | 419.6802   | 0.3082      | 0.6488    | 0.1890      |
| 14  | A    | 421.3627   | 0.3040      | 1.1850    | 0.2437      |
| 15  | A    | 508.6030   | 0.3813      | 2.0898    | 1.0295      |
| 16  | A    | 513.2828   | 0.3888      | 78.2854   | 1.3576      |
| 17  | A    | 539.2461   | 1.1219      | 5.2100    | 3.8622      |
| 18  | A    | 539.9729   | 1.0882      | 3.1244    | 3.5980      |

|    |   |           |        |          |          |
|----|---|-----------|--------|----------|----------|
| 19 | A | 636.4050  | 1.4905 | 1.9477   | 6.6098   |
| 20 | A | 636.4923  | 1.4869 | 0.7576   | 0.8797   |
| 21 | A | 671.0745  | 0.3658 | 187.2178 | 6.2646   |
| 22 | A | 701.0703  | 0.6529 | 42.5659  | 0.8374   |
| 23 | A | 706.8558  | 0.5396 | 40.3655  | 0.1973   |
| 24 | A | 717.8755  | 0.3810 | 202.4985 | 7.4437   |
| 25 | A | 766.8030  | 0.6395 | 173.4266 | 1.9468   |
| 26 | A | 772.5876  | 0.6496 | 104.0190 | 3.7953   |
| 27 | A | 830.9670  | 0.6000 | 0.7543   | 3.1955   |
| 28 | A | 833.0560  | 0.9844 | 5.9722   | 15.4574  |
| 29 | A | 835.5148  | 0.5654 | 1.6248   | 1.1691   |
| 30 | A | 840.6502  | 1.3503 | 14.6757  | 31.2186  |
| 31 | A | 887.8765  | 0.7106 | 25.0907  | 1.3825   |
| 32 | A | 897.9611  | 0.7059 | 9.5185   | 0.1260   |
| 33 | A | 970.0720  | 0.7482 | 0.1763   | 0.0389   |
| 34 | A | 972.4669  | 0.7492 | 0.2360   | 0.0153   |
| 35 | A | 984.8454  | 0.7198 | 0.1482   | 0.3866   |
| 36 | A | 989.9427  | 0.7361 | 0.6759   | 0.1901   |
| 37 | A | 1014.3962 | 3.5626 | 1.4247   | 43.8618  |
| 38 | A | 1015.7446 | 3.5988 | 0.7977   | 19.7635  |
| 39 | A | 1048.0850 | 1.3690 | 4.1868   | 15.7378  |
| 40 | A | 1049.0763 | 1.3811 | 3.5468   | 21.1688  |
| 41 | A | 1073.7672 | 1.0852 | 4.2012   | 0.4063   |
| 42 | A | 1080.2412 | 1.1276 | 6.5750   | 0.3458   |
| 43 | A | 1141.5617 | 0.9631 | 2.4380   | 1.4105   |
| 44 | A | 1154.3506 | 0.9762 | 1.7792   | 1.4082   |
| 45 | A | 1178.5727 | 0.8955 | 1.1432   | 3.9428   |
| 46 | A | 1180.1382 | 0.9010 | 1.0872   | 3.6587   |
| 47 | A | 1198.6557 | 0.9534 | 9.1926   | 2.5718   |
| 48 | A | 1202.2896 | 0.9600 | 9.4644   | 2.1014   |
| 49 | A | 1288.5374 | 3.2043 | 47.4416  | 10.6690  |
| 50 | A | 1308.1888 | 3.2231 | 48.9745  | 17.9951  |
| 51 | A | 1350.1443 | 5.6908 | 4.9652   | 0.8734   |
| 52 | A | 1354.1104 | 4.6668 | 6.5958   | 0.3328   |
| 53 | A | 1369.5160 | 1.4282 | 0.0504   | 0.1594   |
| 54 | A | 1370.4447 | 1.5013 | 0.9923   | 0.2480   |
| 55 | A | 1501.1234 | 3.0626 | 2.1889   | 0.7755   |
| 56 | A | 1501.3847 | 3.0627 | 2.9324   | 2.0679   |
| 57 | A | 1530.2945 | 3.2171 | 51.7625  | 1.9036   |
| 58 | A | 1531.1759 | 3.3116 | 49.5888  | 1.4074   |
| 59 | A | 1626.1843 | 8.6317 | 4.7240   | 3.6911   |
| 60 | A | 1630.1871 | 8.2633 | 3.7652   | 7.8301   |
| 61 | A | 1643.3923 | 4.7361 | 33.0115  | 29.2855  |
| 62 | A | 1647.5485 | 5.5792 | 49.7981  | 15.6725  |
| 63 | A | 1659.6613 | 2.4735 | 110.5028 | 22.0458  |
| 64 | A | 1679.9169 | 1.9912 | 72.3327  | 10.3369  |
| 65 | A | 3152.9369 | 6.3681 | 9.5641   | 58.3516  |
| 66 | A | 3154.9230 | 6.3648 | 12.7799  | 6.6206   |
| 67 | A | 3158.0616 | 6.3876 | 0.1687   | 105.5866 |
| 68 | A | 3166.5789 | 6.4185 | 0.2294   | 60.3614  |
| 69 | A | 3171.2651 | 6.4638 | 8.1743   | 123.0153 |
| 70 | A | 3174.1842 | 6.4771 | 9.0986   | 107.0597 |
| 71 | A | 3174.8014 | 6.4972 | 35.0768  | 31.5689  |
| 72 | A | 3182.7272 | 6.5263 | 19.4965  | 15.8407  |
| 73 | A | 3191.5177 | 6.5845 | 13.5530  | 237.8523 |
| 74 | A | 3193.6443 | 6.5975 | 9.5888   | 265.2665 |
| 75 | A | 3529.7878 | 7.7129 | 54.4106  | 153.3597 |
| 76 | A | 3550.5625 | 7.7827 | 11.0862  | 156.0503 |
| 77 | A | 3626.9897 | 8.4822 | 20.1342  | 33.6266  |
| 78 | A | 3645.0119 | 8.5951 | 16.8304  | 48.2795  |

ANL2\_19

| NM# | Symm | Wavenumber | Force Const | IR Intens | Raman Activ |
|-----|------|------------|-------------|-----------|-------------|
| 1   | A    | 15.3525    | 0.0007      | 0.1906    | 2.8264      |
| 2   | A    | 27.6365    | 0.0020      | 0.5097    | 2.1011      |
| 3   | A    | 36.9534    | 0.0036      | 1.2746    | 1.5747      |
| 4   | A    | 66.2135    | 0.0103      | 0.4426    | 5.9384      |
| 5   | A    | 68.7640    | 0.0109      | 0.2797    | 2.7302      |

|    |   |           |        |          |          |
|----|---|-----------|--------|----------|----------|
| 6  | A | 128.6493  | 0.0505 | 0.2217   | 9.5831   |
| 7  | A | 232.3532  | 0.1135 | 8.4324   | 0.9530   |
| 8  | A | 233.2517  | 0.1160 | 0.1746   | 2.0861   |
| 9  | A | 319.5182  | 0.0650 | 28.1831  | 0.3481   |
| 10 | A | 345.2899  | 0.0775 | 28.0650  | 0.7335   |
| 11 | A | 389.0394  | 0.2427 | 3.3702   | 0.2415   |
| 12 | A | 395.8289  | 0.2589 | 1.0015   | 1.2733   |
| 13 | A | 419.6796  | 0.3082 | 0.6486   | 0.1891   |
| 14 | A | 421.3624  | 0.3040 | 1.1850   | 0.2437   |
| 15 | A | 508.6022  | 0.3813 | 2.0920   | 1.0299   |
| 16 | A | 513.2826  | 0.3888 | 78.2774  | 1.3574   |
| 17 | A | 539.2462  | 1.1219 | 5.2102   | 3.8622   |
| 18 | A | 539.9729  | 1.0882 | 3.1240   | 3.5982   |
| 19 | A | 636.4052  | 1.4906 | 1.9437   | 6.6084   |
| 20 | A | 636.4924  | 1.4868 | 0.7592   | 0.8807   |
| 21 | A | 671.0913  | 0.3658 | 187.1890 | 6.2640   |
| 22 | A | 701.0690  | 0.6529 | 42.5802  | 0.8376   |
| 23 | A | 706.8560  | 0.5396 | 40.3599  | 0.1974   |
| 24 | A | 717.8732  | 0.3810 | 202.5135 | 7.4438   |
| 25 | A | 766.8042  | 0.6395 | 173.4691 | 1.9472   |
| 26 | A | 772.5863  | 0.6496 | 103.9865 | 3.7952   |
| 27 | A | 830.9661  | 0.5999 | 0.7542   | 3.1933   |
| 28 | A | 833.0559  | 0.9846 | 5.9729   | 15.4595  |
| 29 | A | 835.5151  | 0.5654 | 1.6237   | 1.1689   |
| 30 | A | 840.6503  | 1.3504 | 14.6753  | 31.2179  |
| 31 | A | 887.8752  | 0.7106 | 25.0895  | 1.3820   |
| 32 | A | 897.9627  | 0.7059 | 9.5206   | 0.1260   |
| 33 | A | 970.0716  | 0.7482 | 0.1763   | 0.0389   |
| 34 | A | 972.4665  | 0.7492 | 0.2361   | 0.0153   |
| 35 | A | 984.8448  | 0.7198 | 0.1482   | 0.3866   |
| 36 | A | 989.9431  | 0.7361 | 0.6760   | 0.1901   |
| 37 | A | 1014.3962 | 3.5626 | 1.4249   | 43.8564  |
| 38 | A | 1015.7451 | 3.5988 | 0.7974   | 19.7674  |
| 39 | A | 1048.0849 | 1.3690 | 4.1866   | 15.7375  |
| 40 | A | 1049.0764 | 1.3811 | 3.5468   | 21.1683  |
| 41 | A | 1073.7679 | 1.0852 | 4.2011   | 0.4063   |
| 42 | A | 1080.2416 | 1.1276 | 6.5748   | 0.3458   |
| 43 | A | 1141.5624 | 0.9631 | 2.4379   | 1.4105   |
| 44 | A | 1154.3512 | 0.9762 | 1.7793   | 1.4083   |
| 45 | A | 1178.5724 | 0.8955 | 1.1432   | 3.9430   |
| 46 | A | 1180.1380 | 0.9010 | 1.0871   | 3.6584   |
| 47 | A | 1198.6556 | 0.9534 | 9.1928   | 2.5718   |
| 48 | A | 1202.2898 | 0.9600 | 9.4640   | 2.1014   |
| 49 | A | 1288.5344 | 3.2043 | 47.4370  | 10.6691  |
| 50 | A | 1308.1897 | 3.2231 | 48.9747  | 17.9939  |
| 51 | A | 1350.1444 | 5.6908 | 4.9648   | 0.8734   |
| 52 | A | 1354.1106 | 4.6667 | 6.5957   | 0.3328   |
| 53 | A | 1369.5164 | 1.4282 | 0.0505   | 0.1594   |
| 54 | A | 1370.4448 | 1.5013 | 0.9924   | 0.2480   |
| 55 | A | 1501.1237 | 3.0626 | 2.1892   | 0.7758   |
| 56 | A | 1501.3848 | 3.0627 | 2.9323   | 2.0676   |
| 57 | A | 1530.2944 | 3.2171 | 51.7542  | 1.9033   |
| 58 | A | 1531.1761 | 3.3116 | 49.5948  | 1.4075   |
| 59 | A | 1626.1844 | 8.6317 | 4.7239   | 3.6913   |
| 60 | A | 1630.1881 | 8.2635 | 3.7653   | 7.8295   |
| 61 | A | 1643.3924 | 4.7362 | 33.0081  | 29.2863  |
| 62 | A | 1647.5488 | 5.5791 | 49.7992  | 15.6719  |
| 63 | A | 1659.6616 | 2.4735 | 110.5053 | 22.0444  |
| 64 | A | 1679.9173 | 1.9912 | 72.3304  | 10.3369  |
| 65 | A | 3152.9373 | 6.3681 | 9.5639   | 58.3529  |
| 66 | A | 3154.9230 | 6.3648 | 12.7789  | 6.6260   |
| 67 | A | 3158.0624 | 6.3876 | 0.1692   | 105.5882 |
| 68 | A | 3166.5794 | 6.4185 | 0.2298   | 60.3537  |
| 69 | A | 3171.2658 | 6.4638 | 8.1774   | 122.9997 |
| 70 | A | 3174.1839 | 6.4771 | 9.1008   | 107.0934 |
| 71 | A | 3174.8022 | 6.4972 | 35.0699  | 31.5462  |
| 72 | A | 3182.7260 | 6.5263 | 19.4984  | 15.8423  |
| 73 | A | 3191.5175 | 6.5845 | 13.5523  | 237.8559 |
| 74 | A | 3193.6444 | 6.5975 | 9.5891   | 265.2502 |
| 75 | A | 3529.7870 | 7.7129 | 54.4156  | 153.3602 |
| 76 | A | 3550.5592 | 7.7826 | 11.0848  | 156.0486 |

|    |   |           |        |         |         |
|----|---|-----------|--------|---------|---------|
| 77 | A | 3626.9915 | 8.4822 | 20.1360 | 33.6269 |
| 78 | A | 3645.0068 | 8.5950 | 16.8276 | 48.2800 |

ANL2\_20

| NM# | Symm | Wavenumber | Force Const | IR Intens | Raman Activ |
|-----|------|------------|-------------|-----------|-------------|
| 1   | A    | 15.3484    | 0.0007      | 0.1905    | 2.8260      |
| 2   | A    | 27.6345    | 0.0020      | 0.5097    | 2.1011      |
| 3   | A    | 36.9563    | 0.0036      | 1.2749    | 1.5744      |
| 4   | A    | 66.2104    | 0.0103      | 0.4425    | 5.9391      |
| 5   | A    | 68.7643    | 0.0109      | 0.2798    | 2.7296      |
| 6   | A    | 128.6487   | 0.0505      | 0.2217    | 9.5836      |
| 7   | A    | 232.3536   | 0.1135      | 8.4327    | 0.9529      |
| 8   | A    | 233.2502   | 0.1160      | 0.1747    | 2.0860      |
| 9   | A    | 319.5174   | 0.0650      | 28.1792   | 0.3480      |
| 10  | A    | 345.2828   | 0.0775      | 28.0722   | 0.7337      |
| 11  | A    | 389.0400   | 0.2427      | 3.3705    | 0.2416      |
| 12  | A    | 395.8284   | 0.2589      | 1.0022    | 1.2734      |
| 13  | A    | 419.6803   | 0.3082      | 0.6488    | 0.1890      |
| 14  | A    | 421.3630   | 0.3040      | 1.1850    | 0.2437      |
| 15  | A    | 508.6029   | 0.3813      | 2.0899    | 1.0295      |
| 16  | A    | 513.2828   | 0.3888      | 78.2856   | 1.3576      |
| 17  | A    | 539.2460   | 1.1219      | 5.2101    | 3.8622      |
| 18  | A    | 539.9729   | 1.0882      | 3.1244    | 3.5980      |
| 19  | A    | 636.4050   | 1.4904      | 1.9480    | 6.6100      |
| 20  | A    | 636.4923   | 1.4869      | 0.7571    | 0.8795      |
| 21  | A    | 671.0764   | 0.3658      | 187.2162  | 6.2645      |
| 22  | A    | 701.0698   | 0.6529      | 42.5816   | 0.8378      |
| 23  | A    | 706.8560   | 0.5396      | 40.3635   | 0.1973      |
| 24  | A    | 717.8715   | 0.3810      | 202.5026  | 7.4437      |
| 25  | A    | 766.8033   | 0.6395      | 173.4478  | 1.9468      |
| 26  | A    | 772.5860   | 0.6496      | 103.9851  | 3.7952      |
| 27  | A    | 830.9666   | 0.6000      | 0.7545    | 3.1942      |
| 28  | A    | 833.0561   | 0.9845      | 5.9722    | 15.4590     |
| 29  | A    | 835.5149   | 0.5654      | 1.6247    | 1.1689      |
| 30  | A    | 840.6498   | 1.3504      | 14.6736   | 31.2183     |
| 31  | A    | 887.8758   | 0.7106      | 25.0892   | 1.3823      |
| 32  | A    | 897.9609   | 0.7059      | 9.5191    | 0.1260      |
| 33  | A    | 970.0718   | 0.7482      | 0.1763    | 0.0389      |
| 34  | A    | 972.4670   | 0.7492      | 0.2360    | 0.0153      |
| 35  | A    | 984.8453   | 0.7198      | 0.1481    | 0.3865      |
| 36  | A    | 989.9432   | 0.7361      | 0.6759    | 0.1901      |
| 37  | A    | 1014.3961  | 3.5626      | 1.4248    | 43.8618     |
| 38  | A    | 1015.7445  | 3.5988      | 0.7977    | 19.7640     |
| 39  | A    | 1048.0849  | 1.3690      | 4.1868    | 15.7386     |
| 40  | A    | 1049.0765  | 1.3811      | 3.5468    | 21.1679     |
| 41  | A    | 1073.7672  | 1.0852      | 4.2013    | 0.4063      |
| 42  | A    | 1080.2407  | 1.1276      | 6.5749    | 0.3458      |
| 43  | A    | 1141.5617  | 0.9631      | 2.4379    | 1.4105      |
| 44  | A    | 1154.3498  | 0.9762      | 1.7792    | 1.4082      |
| 45  | A    | 1178.5726  | 0.8955      | 1.1432    | 3.9427      |
| 46  | A    | 1180.1382  | 0.9010      | 1.0873    | 3.6587      |
| 47  | A    | 1198.6556  | 0.9534      | 9.1927    | 2.5718      |
| 48  | A    | 1202.2896  | 0.9600      | 9.4645    | 2.1015      |
| 49  | A    | 1288.5376  | 3.2043      | 47.4415   | 10.6691     |
| 50  | A    | 1308.1893  | 3.2231      | 48.9752   | 17.9949     |
| 51  | A    | 1350.1440  | 5.6908      | 4.9652    | 0.8734      |
| 52  | A    | 1354.1102  | 4.6668      | 6.5960    | 0.3328      |
| 53  | A    | 1369.5162  | 1.4282      | 0.0505    | 0.1594      |
| 54  | A    | 1370.4446  | 1.5013      | 0.9922    | 0.2480      |
| 55  | A    | 1501.1231  | 3.0626      | 2.1888    | 0.7757      |
| 56  | A    | 1501.3846  | 3.0627      | 2.9324    | 2.0676      |
| 57  | A    | 1530.2947  | 3.2171      | 51.7638   | 1.9036      |
| 58  | A    | 1531.1759  | 3.3116      | 49.5883   | 1.4073      |
| 59  | A    | 1626.1841  | 8.6317      | 4.7239    | 3.6912      |
| 60  | A    | 1630.1873  | 8.2633      | 3.7652    | 7.8301      |
| 61  | A    | 1643.3920  | 4.7362      | 33.0111   | 29.2850     |
| 62  | A    | 1647.5486  | 5.5794      | 49.8004   | 15.6736     |
| 63  | A    | 1659.6615  | 2.4734      | 110.5014  | 22.0452     |

|    |   |           |        |         |          |
|----|---|-----------|--------|---------|----------|
| 64 | A | 1679.9165 | 1.9912 | 72.3348 | 10.3372  |
| 65 | A | 3152.9377 | 6.3681 | 9.5641  | 58.3484  |
| 66 | A | 3154.9233 | 6.3648 | 12.7794 | 6.6239   |
| 67 | A | 3158.0624 | 6.3876 | 0.1690  | 105.5888 |
| 68 | A | 3166.5772 | 6.4185 | 0.2288  | 60.3640  |
| 69 | A | 3171.2658 | 6.4638 | 8.1763  | 123.0061 |
| 70 | A | 3174.1839 | 6.4771 | 9.1062  | 107.0881 |
| 71 | A | 3174.8021 | 6.4973 | 35.0698 | 31.5400  |
| 72 | A | 3182.7266 | 6.5263 | 19.4947 | 15.8365  |
| 73 | A | 3191.5179 | 6.5845 | 13.5528 | 237.8462 |
| 74 | A | 3193.6433 | 6.5975 | 9.5891  | 265.2841 |
| 75 | A | 3529.7904 | 7.7129 | 54.4102 | 153.3623 |
| 76 | A | 3550.5622 | 7.7827 | 11.0861 | 156.0482 |
| 77 | A | 3626.9924 | 8.4822 | 20.1343 | 33.6266  |
| 78 | A | 3645.0114 | 8.5951 | 16.8303 | 48.2792  |

-----

ANL2\_21

| NM# | Symm | Wavenumber | Force Const | IR Intens | Raman Activ |
|-----|------|------------|-------------|-----------|-------------|
| 1   | A    | 15.3464    | 0.0007      | 0.1905    | 2.8260      |
| 2   | A    | 27.6334    | 0.0020      | 0.5097    | 2.1011      |
| 3   | A    | 36.9563    | 0.0036      | 1.2749    | 1.5743      |
| 4   | A    | 66.2094    | 0.0103      | 0.4425    | 5.9392      |
| 5   | A    | 68.7629    | 0.0109      | 0.2798    | 2.7297      |
| 6   | A    | 128.6482   | 0.0505      | 0.2218    | 9.5836      |
| 7   | A    | 232.3532   | 0.1135      | 8.4328    | 0.9530      |
| 8   | A    | 233.2498   | 0.1160      | 0.1748    | 2.0858      |
| 9   | A    | 319.5201   | 0.0650      | 28.1787   | 0.3480      |
| 10  | A    | 345.2869   | 0.0775      | 28.0726   | 0.7337      |
| 11  | A    | 389.0405   | 0.2427      | 3.3709    | 0.2416      |
| 12  | A    | 395.8289   | 0.2589      | 1.0023    | 1.2734      |
| 13  | A    | 419.6803   | 0.3082      | 0.6488    | 0.1890      |
| 14  | A    | 421.3623   | 0.3040      | 1.1852    | 0.2437      |
| 15  | A    | 508.6030   | 0.3813      | 2.0897    | 1.0294      |
| 16  | A    | 513.2827   | 0.3888      | 78.2856   | 1.3576      |
| 17  | A    | 539.2460   | 1.1219      | 5.2099    | 3.8623      |
| 18  | A    | 539.9730   | 1.0882      | 3.1246    | 3.5980      |
| 19  | A    | 636.4050   | 1.4904      | 1.9481    | 6.6101      |
| 20  | A    | 636.4923   | 1.4869      | 0.7571    | 0.8795      |
| 21  | A    | 671.0766   | 0.3658      | 187.2199  | 6.2646      |
| 22  | A    | 701.0700   | 0.6529      | 42.5732   | 0.8376      |
| 23  | A    | 706.8553   | 0.5396      | 40.3670   | 0.1973      |
| 24  | A    | 717.8725   | 0.3810      | 202.5008  | 7.4437      |
| 25  | A    | 766.8027   | 0.6395      | 173.4365  | 1.9467      |
| 26  | A    | 772.5862   | 0.6496      | 103.9999  | 3.7952      |
| 27  | A    | 830.9664   | 0.5999      | 0.7551    | 3.1932      |
| 28  | A    | 833.0561   | 0.9844      | 5.9713    | 15.4585     |
| 29  | A    | 835.5139   | 0.5654      | 1.6253    | 1.1700      |
| 30  | A    | 840.6498   | 1.3504      | 14.6741   | 31.2188     |
| 31  | A    | 887.8757   | 0.7106      | 25.0896   | 1.3824      |
| 32  | A    | 897.9601   | 0.7059      | 9.5188    | 0.1260      |
| 33  | A    | 970.0716   | 0.7482      | 0.1763    | 0.0389      |
| 34  | A    | 972.4664   | 0.7492      | 0.2360    | 0.0153      |
| 35  | A    | 984.8451   | 0.7198      | 0.1481    | 0.3865      |
| 36  | A    | 989.9420   | 0.7361      | 0.6758    | 0.1901      |
| 37  | A    | 1014.3960  | 3.5626      | 1.4248    | 43.8600     |
| 38  | A    | 1015.7446  | 3.5988      | 0.7977    | 19.7660     |
| 39  | A    | 1048.0848  | 1.3690      | 4.1869    | 15.7380     |
| 40  | A    | 1049.0762  | 1.3811      | 3.5468    | 21.1686     |
| 41  | A    | 1073.7676  | 1.0852      | 4.2013    | 0.4063      |
| 42  | A    | 1080.2409  | 1.1276      | 6.5751    | 0.3458      |
| 43  | A    | 1141.5620  | 0.9631      | 2.4379    | 1.4105      |
| 44  | A    | 1154.3503  | 0.9762      | 1.7792    | 1.4082      |
| 45  | A    | 1178.5725  | 0.8955      | 1.1432    | 3.9427      |
| 46  | A    | 1180.1378  | 0.9010      | 1.0872    | 3.6587      |
| 47  | A    | 1198.6555  | 0.9534      | 9.1926    | 2.5718      |
| 48  | A    | 1202.2893  | 0.9600      | 9.4644    | 2.1015      |
| 49  | A    | 1288.5378  | 3.2043      | 47.4426   | 10.6691     |
| 50  | A    | 1308.1890  | 3.2231      | 48.9750   | 17.9952     |

|    |   |           |        |          |          |
|----|---|-----------|--------|----------|----------|
| 51 | A | 1350.1442 | 5.6908 | 4.9653   | 0.8733   |
| 52 | A | 1354.1099 | 4.6668 | 6.5959   | 0.3328   |
| 53 | A | 1369.5158 | 1.4282 | 0.0505   | 0.1594   |
| 54 | A | 1370.4445 | 1.5013 | 0.9923   | 0.2480   |
| 55 | A | 1501.1229 | 3.0626 | 2.1889   | 0.7753   |
| 56 | A | 1501.3842 | 3.0627 | 2.9323   | 2.0680   |
| 57 | A | 1530.2946 | 3.2171 | 51.7650  | 1.9037   |
| 58 | A | 1531.1758 | 3.3116 | 49.5873  | 1.4073   |
| 59 | A | 1626.1840 | 8.6317 | 4.7240   | 3.6912   |
| 60 | A | 1630.1875 | 8.2633 | 3.7654   | 7.8301   |
| 61 | A | 1643.3922 | 4.7365 | 33.0170  | 29.2883  |
| 62 | A | 1647.5483 | 5.5793 | 49.7960  | 15.6706  |
| 63 | A | 1659.6621 | 2.4734 | 110.4991 | 22.0449  |
| 64 | A | 1679.9163 | 1.9912 | 72.3346  | 10.3372  |
| 65 | A | 3152.9391 | 6.3681 | 9.5638   | 58.3493  |
| 66 | A | 3154.9239 | 6.3648 | 12.7797  | 6.6219   |
| 67 | A | 3158.0628 | 6.3876 | 0.1689   | 105.5899 |
| 68 | A | 3166.5799 | 6.4185 | 0.2294   | 60.3601  |
| 69 | A | 3171.2663 | 6.4638 | 8.1756   | 123.0102 |
| 70 | A | 3174.1852 | 6.4771 | 9.0982   | 107.0738 |
| 71 | A | 3174.8025 | 6.4972 | 35.0756  | 31.5619  |
| 72 | A | 3182.7276 | 6.5263 | 19.4972  | 15.8392  |
| 73 | A | 3191.5186 | 6.5845 | 13.5528  | 237.8552 |
| 74 | A | 3193.6454 | 6.5975 | 9.5894   | 265.2667 |
| 75 | A | 3529.7859 | 7.7129 | 54.4142  | 153.3643 |
| 76 | A | 3550.5601 | 7.7827 | 11.0863  | 156.0493 |
| 77 | A | 3626.9916 | 8.4822 | 20.1340  | 33.6278  |
| 78 | A | 3645.0091 | 8.5950 | 16.8308  | 48.2791  |

ANL2\_22

| NM# | Symm | Wavenumber | Force Const | IR Intens | Raman Activ |
|-----|------|------------|-------------|-----------|-------------|
| 1   | A    | 15.3473    | 0.0007      | 0.1906    | 2.8260      |
| 2   | A    | 27.6341    | 0.0020      | 0.5097    | 2.1012      |
| 3   | A    | 36.9561    | 0.0036      | 1.2748    | 1.5743      |
| 4   | A    | 66.2104    | 0.0103      | 0.4425    | 5.9392      |
| 5   | A    | 68.7640    | 0.0109      | 0.2798    | 2.7295      |
| 6   | A    | 128.6489   | 0.0505      | 0.2218    | 9.5836      |
| 7   | A    | 232.3534   | 0.1135      | 8.4325    | 0.9530      |
| 8   | A    | 233.2505   | 0.1160      | 0.1749    | 2.0858      |
| 9   | A    | 319.5187   | 0.0650      | 28.1787   | 0.3480      |
| 10  | A    | 345.2836   | 0.0775      | 28.0730   | 0.7337      |
| 11  | A    | 389.0401   | 0.2427      | 3.3706    | 0.2416      |
| 12  | A    | 395.8287   | 0.2589      | 1.0024    | 1.2734      |
| 13  | A    | 419.6802   | 0.3082      | 0.6488    | 0.1890      |
| 14  | A    | 421.3627   | 0.3040      | 1.1851    | 0.2437      |
| 15  | A    | 508.6029   | 0.3813      | 2.0897    | 1.0295      |
| 16  | A    | 513.2828   | 0.3888      | 78.2850   | 1.3577      |
| 17  | A    | 539.2461   | 1.1219      | 5.2100    | 3.8623      |
| 18  | A    | 539.9729   | 1.0882      | 3.1246    | 3.5979      |
| 19  | A    | 636.4050   | 1.4905      | 1.9471    | 6.6097      |
| 20  | A    | 636.4923   | 1.4869      | 0.7575    | 0.8798      |
| 21  | A    | 671.0803   | 0.3658      | 187.2152  | 6.2645      |
| 22  | A    | 701.0700   | 0.6529      | 42.5793   | 0.8377      |
| 23  | A    | 706.8561   | 0.5396      | 40.3646   | 0.1973      |
| 24  | A    | 717.8720   | 0.3810      | 202.5032  | 7.4437      |
| 25  | A    | 766.8032   | 0.6395      | 173.4453  | 1.9467      |
| 26  | A    | 772.5860   | 0.6496      | 103.9900  | 3.7952      |
| 27  | A    | 830.9666   | 0.6000      | 0.7544    | 3.1947      |
| 28  | A    | 833.0561   | 0.9844      | 5.9725    | 15.4582     |
| 29  | A    | 835.5146   | 0.5654      | 1.6248    | 1.1692      |
| 30  | A    | 840.6500   | 1.3504      | 14.6738   | 31.2183     |
| 31  | A    | 887.8758   | 0.7106      | 25.0888   | 1.3824      |
| 32  | A    | 897.9613   | 0.7059      | 9.5195    | 0.1260      |
| 33  | A    | 970.0719   | 0.7482      | 0.1763    | 0.0389      |
| 34  | A    | 972.4665   | 0.7492      | 0.2360    | 0.0153      |
| 35  | A    | 984.8454   | 0.7198      | 0.1481    | 0.3866      |
| 36  | A    | 989.9424   | 0.7361      | 0.6759    | 0.1901      |
| 37  | A    | 1014.3961  | 3.5626      | 1.4248    | 43.8597     |

ESI-78

|    |   |           |        |          |          |
|----|---|-----------|--------|----------|----------|
| 38 | A | 1015.7447 | 3.5988 | 0.7976   | 19.7660  |
| 39 | A | 1048.0849 | 1.3690 | 4.1869   | 15.7382  |
| 40 | A | 1049.0763 | 1.3811 | 3.5468   | 21.1684  |
| 41 | A | 1073.7677 | 1.0852 | 4.2013   | 0.4063   |
| 42 | A | 1080.2408 | 1.1276 | 6.5749   | 0.3458   |
| 43 | A | 1141.5623 | 0.9631 | 2.4379   | 1.4105   |
| 44 | A | 1154.3500 | 0.9762 | 1.7792   | 1.4082   |
| 45 | A | 1178.5726 | 0.8955 | 1.1432   | 3.9427   |
| 46 | A | 1180.1380 | 0.9010 | 1.0872   | 3.6587   |
| 47 | A | 1198.6558 | 0.9534 | 9.1927   | 2.5718   |
| 48 | A | 1202.2896 | 0.9600 | 9.4643   | 2.1014   |
| 49 | A | 1288.5368 | 3.2043 | 47.4415  | 10.6694  |
| 50 | A | 1308.1901 | 3.2231 | 48.9755  | 17.9947  |
| 51 | A | 1350.1446 | 5.6908 | 4.9652   | 0.8734   |
| 52 | A | 1354.1103 | 4.6668 | 6.5959   | 0.3328   |
| 53 | A | 1369.5160 | 1.4282 | 0.0505   | 0.1594   |
| 54 | A | 1370.4446 | 1.5013 | 0.9922   | 0.2480   |
| 55 | A | 1501.1234 | 3.0626 | 2.1889   | 0.7752   |
| 56 | A | 1501.3845 | 3.0627 | 2.9323   | 2.0681   |
| 57 | A | 1530.2944 | 3.2171 | 51.7608  | 1.9035   |
| 58 | A | 1531.1760 | 3.3116 | 49.5912  | 1.4075   |
| 59 | A | 1626.1840 | 8.6317 | 4.7241   | 3.6912   |
| 60 | A | 1630.1872 | 8.2633 | 3.7654   | 7.8301   |
| 61 | A | 1643.3925 | 4.7362 | 33.0132  | 29.2861  |
| 62 | A | 1647.5487 | 5.5792 | 49.7982  | 15.6720  |
| 63 | A | 1659.6618 | 2.4735 | 110.5007 | 22.0457  |
| 64 | A | 1679.9170 | 1.9912 | 72.3349  | 10.3372  |
| 65 | A | 3152.9383 | 6.3681 | 9.5646   | 58.3531  |
| 66 | A | 3154.9232 | 6.3648 | 12.7798  | 6.6216   |
| 67 | A | 3158.0620 | 6.3876 | 0.1688   | 105.5890 |
| 68 | A | 3166.5790 | 6.4185 | 0.2290   | 60.3541  |
| 69 | A | 3171.2655 | 6.4638 | 8.1749   | 123.0118 |
| 70 | A | 3174.1857 | 6.4771 | 9.0883   | 107.0378 |
| 71 | A | 3174.8017 | 6.4972 | 35.0840  | 31.5935  |
| 72 | A | 3182.7271 | 6.5263 | 19.4985  | 15.8351  |
| 73 | A | 3191.5179 | 6.5845 | 13.5529  | 237.8531 |
| 74 | A | 3193.6445 | 6.5975 | 9.5893   | 265.2776 |
| 75 | A | 3529.7899 | 7.7129 | 54.4112  | 153.3647 |
| 76 | A | 3550.5600 | 7.7827 | 11.0860  | 156.0462 |
| 77 | A | 3626.9922 | 8.4822 | 20.1345  | 33.6267  |
| 78 | A | 3645.0089 | 8.5950 | 16.8305  | 48.2797  |

-----

ANL-ic3H7I\_1

| NM# | Symm | Wavenumber | Force Const | IR Intens | Raman Activ |
|-----|------|------------|-------------|-----------|-------------|
| 1   | A    | -2.0350    | 0.0000      | 0.0007    | 0.4966      |
| 2   | A    | 9.7099     | 0.0002      | 0.5345    | 7.2144      |
| 3   | A    | 13.1241    | 0.0005      | 0.3823    | 5.6546      |
| 4   | A    | 39.2993    | 0.0066      | 0.7606    | 0.1207      |
| 5   | A    | 45.2899    | 0.0059      | 1.0747    | 0.2040      |
| 6   | A    | 80.4401    | 0.0211      | 2.8298    | 18.1499     |
| 7   | A    | 227.8804   | 0.1101      | 0.6071    | 4.2722      |
| 8   | A    | 249.0096   | 0.0824      | 0.4418    | 18.0332     |
| 9   | A    | 250.9797   | 0.0412      | 0.0967    | 0.2194      |
| 10  | A    | 262.0652   | 0.0929      | 0.9058    | 0.6595      |
| 11  | A    | 282.4895   | 0.0593      | 0.1358    | 10.1317     |
| 12  | A    | 317.7943   | 0.0638      | 7.4034    | 0.6193      |
| 13  | A    | 387.5295   | 0.2575      | 0.1893    | 0.4500      |
| 14  | A    | 398.2733   | 0.2065      | 0.8411    | 4.3454      |
| 15  | A    | 415.2630   | 0.2961      | 0.1455    | 0.0185      |
| 16  | A    | 488.8874   | 0.3937      | 21.8613   | 89.2683     |
| 17  | A    | 503.6871   | 0.3492      | 58.4671   | 0.5855      |
| 18  | A    | 539.5003   | 1.0990      | 5.1130    | 3.3634      |
| 19  | A    | 598.9327   | 0.2900      | 299.9461  | 16.7083     |
| 20  | A    | 636.7996   | 1.5196      | 0.2080    | 3.9396      |
| 21  | A    | 697.6760   | 0.5575      | 30.4990   | 0.4243      |
| 22  | A    | 757.2579   | 0.6096      | 87.8708   | 1.9110      |
| 23  | A    | 822.5675   | 0.5022      | 0.2369    | 0.4003      |
| 24  | A    | 833.6269   | 1.8179      | 3.8286    | 20.3569     |

|    |   |           |        |          |          |
|----|---|-----------|--------|----------|----------|
| 25 | A | 881.1502  | 0.6888 | 13.7125  | 0.3928   |
| 26 | A | 885.5749  | 1.2436 | 3.9636   | 21.6237  |
| 27 | A | 942.6571  | 0.5981 | 0.9628   | 0.1567   |
| 28 | A | 959.5256  | 0.7740 | 0.4651   | 0.8098   |
| 29 | A | 961.7786  | 0.7356 | 0.0837   | 0.0652   |
| 30 | A | 978.1768  | 0.7105 | 0.1526   | 0.5146   |
| 31 | A | 1014.6553 | 3.6403 | 1.2476   | 35.8091  |
| 32 | A | 1038.0107 | 0.7591 | 5.4801   | 3.0083   |
| 33 | A | 1048.9372 | 1.3753 | 4.0139   | 18.2076  |
| 34 | A | 1065.7267 | 1.0493 | 2.3450   | 0.0870   |
| 35 | A | 1134.9618 | 0.9734 | 4.7700   | 2.5605   |
| 36 | A | 1137.5534 | 1.7325 | 1.1116   | 1.7240   |
| 37 | A | 1171.9223 | 1.4437 | 64.9554  | 32.5557  |
| 38 | A | 1180.0884 | 0.9043 | 1.3626   | 4.0485   |
| 39 | A | 1200.6743 | 0.9575 | 9.5096   | 3.3017   |
| 40 | A | 1232.4108 | 1.2171 | 56.8172  | 30.5761  |
| 41 | A | 1295.9880 | 3.2221 | 67.3320  | 15.5941  |
| 42 | A | 1349.6780 | 5.9334 | 4.4971   | 1.6685   |
| 43 | A | 1355.8321 | 1.4417 | 0.8466   | 2.6323   |
| 44 | A | 1367.9945 | 1.4241 | 0.0018   | 0.1645   |
| 45 | A | 1407.2279 | 1.4719 | 11.7453  | 2.1721   |
| 46 | A | 1422.3253 | 1.4567 | 6.2637   | 3.5200   |
| 47 | A | 1481.7991 | 1.3506 | 3.2880   | 6.7478   |
| 48 | A | 1487.3170 | 1.3622 | 0.3070   | 9.4872   |
| 49 | A | 1494.6287 | 1.3717 | 13.7558  | 12.9228  |
| 50 | A | 1501.2088 | 3.0793 | 1.9380   | 1.6706   |
| 51 | A | 1506.3947 | 1.3980 | 5.1086   | 1.7476   |
| 52 | A | 1531.4525 | 3.2456 | 61.5750  | 2.1366   |
| 53 | A | 1630.5369 | 9.0027 | 4.6569   | 4.2042   |
| 54 | A | 1645.3634 | 4.2278 | 32.3833  | 23.1109  |
| 55 | A | 1661.8143 | 2.3929 | 131.7247 | 27.7147  |
| 56 | A | 3007.0022 | 5.5662 | 12.8821  | 43.0602  |
| 57 | A | 3012.4781 | 5.5830 | 71.4626  | 582.7441 |
| 58 | A | 3076.0636 | 6.0767 | 11.5873  | 155.1754 |
| 59 | A | 3077.7390 | 6.0864 | 3.3186   | 12.7523  |
| 60 | A | 3097.6461 | 6.1612 | 13.7875  | 113.2687 |
| 61 | A | 3112.2216 | 6.2891 | 12.2497  | 30.4971  |
| 62 | A | 3120.4509 | 6.3045 | 24.2931  | 49.6918  |
| 63 | A | 3153.8976 | 6.3645 | 15.6136  | 9.1575   |
| 64 | A | 3155.4338 | 6.3810 | 1.5656   | 96.1241  |
| 65 | A | 3169.2794 | 6.4509 | 5.2302   | 138.8077 |
| 66 | A | 3174.9720 | 6.4968 | 30.1545  | 29.0320  |
| 67 | A | 3190.9271 | 6.5833 | 13.0998  | 260.9123 |
| 68 | A | 3565.7516 | 7.8465 | 19.6145  | 184.7435 |
| 69 | A | 3664.3350 | 8.6951 | 17.5316  | 48.2901  |

ANL-ic3H7I\_2

| NM# | Symm | Wavenumber | Force Const | IR Intens | Raman Activ |
|-----|------|------------|-------------|-----------|-------------|
| 1   | A    | 3.2564     | 0.0000      | 0.0153    | 0.5027      |
| 2   | A    | 9.4347     | 0.0002      | 0.5224    | 7.5966      |
| 3   | A    | 13.3226    | 0.0005      | 0.3924    | 5.0328      |
| 4   | A    | 38.5768    | 0.0061      | 0.6818    | 0.2484      |
| 5   | A    | 45.7095    | 0.0063      | 1.1356    | 0.1356      |
| 6   | A    | 80.4072    | 0.0211      | 2.8462    | 17.9121     |
| 7   | A    | 227.8385   | 0.1103      | 0.6326    | 4.5168      |
| 8   | A    | 248.6559   | 0.0800      | 0.4922    | 16.9602     |
| 9   | A    | 250.6483   | 0.0410      | 0.0686    | 0.3596      |
| 10  | A    | 263.0292   | 0.0977      | 0.6288    | 0.8834      |
| 11  | A    | 282.1757   | 0.0594      | 0.1234    | 10.3886     |
| 12  | A    | 316.6993   | 0.0628      | 7.8901    | 0.5035      |
| 13  | A    | 387.0425   | 0.2549      | 0.2039    | 0.4393      |
| 14  | A    | 398.7781   | 0.2083      | 1.0366    | 4.3809      |
| 15  | A    | 415.2505   | 0.2958      | 0.1617    | 0.0460      |
| 16  | A    | 489.0907   | 0.3948      | 20.0207   | 89.6524     |
| 17  | A    | 503.5819   | 0.3482      | 59.7448   | 0.5616      |
| 18  | A    | 539.4687   | 1.0994      | 5.1188    | 3.4229      |
| 19  | A    | 598.9294   | 0.2900      | 298.5736  | 16.8324     |
| 20  | A    | 636.8179   | 1.5197      | 0.2073    | 3.9216      |



|    |   |           |        |          |          |
|----|---|-----------|--------|----------|----------|
| 21 | A | 697.5672  | 0.5571 | 30.5906  | 0.4769   |
| 22 | A | 757.2629  | 0.6096 | 87.7694  | 1.9357   |
| 23 | A | 822.5097  | 0.5021 | 0.2513   | 0.4098   |
| 24 | A | 833.6136  | 1.8174 | 3.8452   | 20.3980  |
| 25 | A | 881.1873  | 0.6889 | 13.6775  | 0.3957   |
| 26 | A | 885.5665  | 1.2446 | 4.1156   | 20.9822  |
| 27 | A | 942.5586  | 0.5980 | 0.9847   | 0.1999   |
| 28 | A | 959.4935  | 0.7738 | 0.4730   | 0.8050   |
| 29 | A | 961.6729  | 0.7354 | 0.0872   | 0.0663   |
| 30 | A | 978.1074  | 0.7104 | 0.1560   | 0.5048   |
| 31 | A | 1014.6861 | 3.6410 | 1.2504   | 35.6245  |
| 32 | A | 1038.2149 | 0.7599 | 5.6344   | 3.5629   |
| 33 | A | 1048.9549 | 1.3753 | 4.0151   | 18.2125  |
| 34 | A | 1065.7722 | 1.0494 | 2.3641   | 0.0741   |
| 35 | A | 1135.0233 | 0.9673 | 5.0455   | 1.9552   |
| 36 | A | 1137.5364 | 1.7515 | 0.7655   | 2.1303   |
| 37 | A | 1171.8984 | 1.4442 | 65.2677  | 32.3814  |
| 38 | A | 1180.0920 | 0.9043 | 1.3604   | 4.0019   |
| 39 | A | 1200.6919 | 0.9575 | 9.4637   | 3.3096   |
| 40 | A | 1232.4866 | 1.2164 | 56.9498  | 30.9789  |
| 41 | A | 1295.9304 | 3.2217 | 67.0937  | 15.5585  |
| 42 | A | 1349.6912 | 5.9327 | 4.5068   | 1.6115   |
| 43 | A | 1355.6710 | 1.4422 | 0.9127   | 2.7715   |
| 44 | A | 1368.0101 | 1.4241 | 0.0023   | 0.1703   |
| 45 | A | 1407.2157 | 1.4714 | 11.7580  | 2.1495   |
| 46 | A | 1422.3858 | 1.4570 | 5.9941   | 3.8662   |
| 47 | A | 1481.7671 | 1.3507 | 3.4019   | 6.4879   |
| 48 | A | 1487.1768 | 1.3620 | 0.3670   | 9.6157   |
| 49 | A | 1494.5526 | 1.3716 | 13.7097  | 12.5717  |
| 50 | A | 1501.2194 | 3.0786 | 2.0127   | 1.7263   |
| 51 | A | 1506.2368 | 1.3978 | 5.4065   | 1.7795   |
| 52 | A | 1531.4624 | 3.2455 | 61.5538  | 2.1524   |
| 53 | A | 1630.5595 | 9.0031 | 4.6072   | 4.2242   |
| 54 | A | 1645.3683 | 4.2213 | 32.4031  | 22.9060  |
| 55 | A | 1661.8027 | 2.3950 | 131.2508 | 27.8894  |
| 56 | A | 3006.9627 | 5.5663 | 12.7115  | 42.6020  |
| 57 | A | 3012.4481 | 5.5831 | 72.1873  | 585.1951 |
| 58 | A | 3075.8150 | 6.0763 | 11.5231  | 149.5859 |
| 59 | A | 3077.7485 | 6.0862 | 3.4702   | 18.2229  |
| 60 | A | 3097.7297 | 6.1608 | 14.0556  | 111.1718 |
| 61 | A | 3112.4563 | 6.2894 | 12.0192  | 30.5269  |
| 62 | A | 3120.4995 | 6.3052 | 24.0276  | 47.7878  |
| 63 | A | 3153.8694 | 6.3646 | 15.4202  | 10.7109  |
| 64 | A | 3155.4682 | 6.3809 | 1.7668   | 94.8029  |
| 65 | A | 3169.2731 | 6.4509 | 5.2559   | 138.8464 |
| 66 | A | 3174.9610 | 6.4968 | 30.1622  | 29.1223  |
| 67 | A | 3190.9139 | 6.5832 | 13.1292  | 261.3771 |
| 68 | A | 3565.7623 | 7.8465 | 19.5042  | 184.8640 |
| 69 | A | 3664.3295 | 8.6950 | 17.5294  | 48.4959  |

-----

ANL-nC3F7I\_d\_1

| NM# | Symm | Wavenumber | Force Const | IR Intens | Raman Activ |
|-----|------|------------|-------------|-----------|-------------|
| 1   | A    | 3.5148     | 0.0001      | 0.3459    | 0.2829      |
| 2   | A    | 10.7842    | 0.0007      | 0.0276    | 1.5405      |
| 3   | A    | 15.0008    | 0.0012      | 0.1111    | 1.5692      |
| 4   | A    | 21.3717    | 0.0013      | 0.0022    | 5.4390      |
| 5   | A    | 47.4921    | 0.0130      | 0.0831    | 2.9511      |
| 6   | A    | 57.3906    | 0.0124      | 0.3714    | 1.1244      |
| 7   | A    | 80.9316    | 0.0754      | 0.1241    | 0.0169      |
| 8   | A    | 106.7738   | 0.0473      | 5.6179    | 8.1820      |
| 9   | A    | 120.0371   | 0.1081      | 10.5152   | 7.5674      |
| 10  | A    | 160.0349   | 0.2843      | 1.0285    | 2.2744      |
| 11  | A    | 220.2511   | 0.5286      | 1.0851    | 2.0529      |
| 12  | A    | 235.8806   | 0.4164      | 5.9086    | 50.0350     |
| 13  | A    | 247.7488   | 0.1616      | 1.3816    | 0.1401      |
| 14  | A    | 256.7718   | 0.6706      | 1.8847    | 3.7983      |
| 15  | A    | 275.5193   | 0.7360      | 3.9246    | 3.8947      |
| 16  | A    | 302.4539   | 0.9573      | 1.7825    | 0.8531      |

|    |   |           |         |          |          |
|----|---|-----------|---------|----------|----------|
| 17 | A | 324.4975  | 1.1301  | 0.4546   | 2.3197   |
| 18 | A | 345.6812  | 0.2666  | 2.3565   | 0.9544   |
| 19 | A | 351.5715  | 0.1366  | 5.8298   | 0.4277   |
| 20 | A | 394.0062  | 1.2314  | 0.6886   | 2.2108   |
| 21 | A | 409.9111  | 0.2749  | 0.1765   | 0.4055   |
| 22 | A | 422.3956  | 0.2227  | 1.7731   | 0.4161   |
| 23 | A | 461.7503  | 2.0210  | 2.5237   | 4.5534   |
| 24 | A | 508.1462  | 0.3983  | 24.1689  | 4.9743   |
| 25 | A | 527.7465  | 2.9347  | 9.1282   | 0.7178   |
| 26 | A | 540.7115  | 1.0853  | 1.2207   | 5.3582   |
| 27 | A | 578.3796  | 3.5154  | 0.5976   | 8.8832   |
| 28 | A | 613.3350  | 3.8272  | 5.3243   | 1.2379   |
| 29 | A | 636.6881  | 1.5224  | 0.1316   | 4.1086   |
| 30 | A | 644.5515  | 4.2767  | 7.8776   | 10.8970  |
| 31 | A | 699.0823  | 0.5870  | 37.8982  | 2.5293   |
| 32 | A | 732.4641  | 0.4675  | 74.1397  | 71.2366  |
| 33 | A | 741.5766  | 3.0592  | 51.0423  | 6.1115   |
| 34 | A | 781.0279  | 0.6650  | 281.1328 | 52.8639  |
| 35 | A | 827.3827  | 0.5073  | 0.2359   | 0.2950   |
| 36 | A | 834.5500  | 1.2805  | 12.3154  | 33.7576  |
| 37 | A | 874.7515  | 5.1096  | 168.9463 | 45.1614  |
| 38 | A | 894.4891  | 0.7120  | 15.1445  | 1.4010   |
| 39 | A | 967.1106  | 0.7462  | 0.0664   | 0.0232   |
| 40 | A | 987.5002  | 0.7326  | 0.1381   | 0.7902   |
| 41 | A | 1017.4339 | 4.1941  | 47.8745  | 19.4940  |
| 42 | A | 1018.2063 | 6.5128  | 172.5316 | 47.4454  |
| 43 | A | 1049.5819 | 1.3813  | 3.6325   | 17.5401  |
| 44 | A | 1074.5043 | 1.0717  | 3.5292   | 0.0367   |
| 45 | A | 1100.0921 | 9.5151  | 89.3855  | 9.1021   |
| 46 | A | 1103.7847 | 9.4568  | 7.0990   | 1.0962   |
| 47 | A | 1139.7299 | 0.9580  | 4.7188   | 1.5046   |
| 48 | A | 1153.2288 | 10.2447 | 136.1136 | 8.4154   |
| 49 | A | 1182.6797 | 0.9121  | 0.3988   | 4.3909   |
| 50 | A | 1188.2007 | 10.8828 | 460.7453 | 5.8402   |
| 51 | A | 1201.5787 | 0.9875  | 14.7485  | 4.7258   |
| 52 | A | 1202.3964 | 8.3407  | 311.2999 | 4.7602   |
| 53 | A | 1231.2671 | 10.9659 | 170.5480 | 21.2480  |
| 54 | A | 1277.5654 | 3.2316  | 47.2708  | 40.9294  |
| 55 | A | 1318.1556 | 12.7438 | 59.9507  | 12.9703  |
| 56 | A | 1349.3473 | 5.5572  | 1.8917   | 3.2373   |
| 57 | A | 1369.9279 | 1.4335  | 0.0395   | 0.1043   |
| 58 | A | 1502.7436 | 3.0463  | 3.3624   | 2.0288   |
| 59 | A | 1530.9420 | 3.1939  | 56.0429  | 1.6485   |
| 60 | A | 1636.5523 | 9.1081  | 4.1157   | 4.8385   |
| 61 | A | 1645.4154 | 4.3420  | 29.6094  | 42.5860  |
| 62 | A | 1658.5296 | 2.3112  | 100.3506 | 28.4631  |
| 63 | A | 3157.4513 | 6.3855  | 13.5406  | 18.5847  |
| 64 | A | 3158.3823 | 6.3967  | 2.3327   | 79.5855  |
| 65 | A | 3173.3235 | 6.4647  | 3.0873   | 124.3463 |
| 66 | A | 3180.2768 | 6.5174  | 20.8047  | 41.1383  |
| 67 | A | 3194.5373 | 6.5997  | 10.4178  | 263.1253 |
| 68 | A | 3538.0659 | 7.7314  | 20.4621  | 182.5084 |
| 69 | A | 3629.5513 | 8.5185  | 19.2160  | 47.1451  |

-----

ANL-nC3F7I\_d\_2

| NM# | Symm | Wavenumber | Force Const | IR Intens | Raman Activ |
|-----|------|------------|-------------|-----------|-------------|
| 1   | A    | 3.5117     | 0.0001      | 0.3459    | 0.2831      |
| 2   | A    | 10.7845    | 0.0007      | 0.0277    | 1.5402      |
| 3   | A    | 15.0017    | 0.0012      | 0.1111    | 1.5690      |
| 4   | A    | 21.3762    | 0.0013      | 0.0022    | 5.4386      |
| 5   | A    | 47.4939    | 0.0130      | 0.0831    | 2.9516      |
| 6   | A    | 57.3930    | 0.0124      | 0.3714    | 1.1249      |
| 7   | A    | 80.9317    | 0.0754      | 0.1241    | 0.0169      |
| 8   | A    | 106.7772   | 0.0473      | 5.6154    | 8.1790      |
| 9   | A    | 120.0380   | 0.1081      | 10.5180   | 7.5695      |
| 10  | A    | 160.0351   | 0.2843      | 1.0285    | 2.2744      |
| 11  | A    | 220.2512   | 0.5286      | 1.0851    | 2.0528      |
| 12  | A    | 235.8816   | 0.4165      | 5.9085    | 50.0343     |

|    |   |           |         |          |          |
|----|---|-----------|---------|----------|----------|
| 13 | A | 247.7508  | 0.1616  | 1.3827   | 0.1404   |
| 14 | A | 256.7721  | 0.6706  | 1.8846   | 3.7979   |
| 15 | A | 275.5194  | 0.7360  | 3.9246   | 3.8949   |
| 16 | A | 302.4537  | 0.9573  | 1.7824   | 0.8531   |
| 17 | A | 324.4976  | 1.1301  | 0.4546   | 2.3197   |
| 18 | A | 345.6830  | 0.2669  | 2.3534   | 0.9548   |
| 19 | A | 351.5747  | 0.1366  | 5.8322   | 0.4272   |
| 20 | A | 394.0064  | 1.2315  | 0.6886   | 2.2110   |
| 21 | A | 409.9129  | 0.2749  | 0.1764   | 0.4053   |
| 22 | A | 422.3995  | 0.2227  | 1.7739   | 0.4162   |
| 23 | A | 461.7505  | 2.0209  | 2.5239   | 4.5534   |
| 24 | A | 508.1470  | 0.3983  | 24.1673  | 4.9741   |
| 25 | A | 527.7463  | 2.9347  | 9.1281   | 0.7178   |
| 26 | A | 540.7115  | 1.0853  | 1.2206   | 5.3582   |
| 27 | A | 578.3797  | 3.5154  | 0.5976   | 8.8832   |
| 28 | A | 613.3351  | 3.8272  | 5.3243   | 1.2379   |
| 29 | A | 636.6880  | 1.5224  | 0.1316   | 4.1086   |
| 30 | A | 644.5514  | 4.2767  | 7.8776   | 10.8968  |
| 31 | A | 699.0833  | 0.5870  | 37.8976  | 2.5294   |
| 32 | A | 732.4653  | 0.4675  | 74.1382  | 71.2364  |
| 33 | A | 741.5766  | 3.0589  | 51.0441  | 6.1106   |
| 34 | A | 781.0273  | 0.6650  | 281.1334 | 52.8617  |
| 35 | A | 827.3839  | 0.5073  | 0.2359   | 0.2950   |
| 36 | A | 834.5499  | 1.2806  | 12.3150  | 33.7569  |
| 37 | A | 874.7518  | 5.1096  | 168.9475 | 45.1611  |
| 38 | A | 894.4891  | 0.7120  | 15.1440  | 1.4007   |
| 39 | A | 967.1118  | 0.7462  | 0.0664   | 0.0232   |
| 40 | A | 987.5010  | 0.7326  | 0.1381   | 0.7902   |
| 41 | A | 1017.4339 | 4.1941  | 47.8708  | 19.4946  |
| 42 | A | 1018.2063 | 6.5129  | 172.5339 | 47.4446  |
| 43 | A | 1049.5821 | 1.3813  | 3.6325   | 17.5400  |
| 44 | A | 1074.5037 | 1.0717  | 3.5291   | 0.0367   |
| 45 | A | 1100.0908 | 9.5151  | 89.3996  | 9.1007   |
| 46 | A | 1103.7859 | 9.4568  | 7.0886   | 1.0968   |
| 47 | A | 1139.7298 | 0.9580  | 4.7188   | 1.5047   |
| 48 | A | 1153.2296 | 10.2447 | 136.1105 | 8.4155   |
| 49 | A | 1182.6797 | 0.9121  | 0.3988   | 4.3909   |
| 50 | A | 1188.2002 | 10.8828 | 460.7628 | 5.8394   |
| 51 | A | 1201.5792 | 0.9875  | 14.7371  | 4.7261   |
| 52 | A | 1202.3973 | 8.3433  | 311.2863 | 4.7608   |
| 53 | A | 1231.2664 | 10.9659 | 170.5576 | 21.2474  |
| 54 | A | 1277.5657 | 3.2316  | 47.2713  | 40.9280  |
| 55 | A | 1318.1563 | 12.7439 | 59.9503  | 12.9703  |
| 56 | A | 1349.3473 | 5.5573  | 1.8918   | 3.2372   |
| 57 | A | 1369.9281 | 1.4335  | 0.0395   | 0.1043   |
| 58 | A | 1502.7435 | 3.0463  | 3.3623   | 2.0288   |
| 59 | A | 1530.9421 | 3.1939  | 56.0428  | 1.6484   |
| 60 | A | 1636.5522 | 9.1081  | 4.1158   | 4.8385   |
| 61 | A | 1645.4154 | 4.3420  | 29.6092  | 42.5840  |
| 62 | A | 1658.5296 | 2.3112  | 100.3520 | 28.4632  |
| 63 | A | 3157.4511 | 6.3855  | 13.5398  | 18.5917  |
| 64 | A | 3158.3823 | 6.3967  | 2.3338   | 79.5786  |
| 65 | A | 3173.3235 | 6.4647  | 3.0871   | 124.3467 |
| 66 | A | 3180.2768 | 6.5174  | 20.8047  | 41.1386  |
| 67 | A | 3194.5375 | 6.5997  | 10.4180  | 263.1241 |
| 68 | A | 3538.0685 | 7.7314  | 20.4627  | 182.5094 |
| 69 | A | 3629.5540 | 8.5185  | 19.2161  | 47.1450  |

-----

ANL-nC3F7I\_s\_1

| NM# | Symm | Wavenumber | Force Const | IR Intens | Raman Activ |
|-----|------|------------|-------------|-----------|-------------|
| 1   | A    | 1.9100     | 0.0000      | 0.2089    | 0.2713      |
| 2   | A    | 13.1703    | 0.0008      | 0.0067    | 3.1369      |
| 3   | A    | 18.1557    | 0.0010      | 0.1977    | 3.2007      |
| 4   | A    | 26.3500    | 0.0036      | 0.1106    | 2.6224      |
| 5   | A    | 46.6729    | 0.0130      | 0.0746    | 2.9500      |
| 6   | A    | 54.7673    | 0.0126      | 0.4059    | 1.0394      |
| 7   | A    | 74.9384    | 0.0509      | 0.0012    | 0.0120      |
| 8   | A    | 106.5756   | 0.0436      | 7.7229    | 10.9100     |

|    |   |           |         |          |          |
|----|---|-----------|---------|----------|----------|
| 9  | A | 116.2344  | 0.1067  | 7.2080   | 3.5415   |
| 10 | A | 156.9533  | 0.3651  | 5.5407   | 18.2594  |
| 11 | A | 213.6580  | 0.4784  | 2.5228   | 0.2172   |
| 12 | A | 231.0259  | 0.5904  | 0.1027   | 0.0034   |
| 13 | A | 244.5438  | 0.1448  | 5.5803   | 23.4180  |
| 14 | A | 262.1637  | 0.6348  | 0.0390   | 1.3990   |
| 15 | A | 264.2697  | 0.6276  | 2.0982   | 29.7213  |
| 16 | A | 286.5344  | 0.8872  | 3.4519   | 1.1855   |
| 17 | A | 336.6112  | 1.2449  | 0.6137   | 1.3063   |
| 18 | A | 349.7720  | 0.0978  | 8.2052   | 0.2282   |
| 19 | A | 371.2247  | 1.5191  | 0.0128   | 0.8868   |
| 20 | A | 378.7739  | 1.2283  | 0.2107   | 0.4743   |
| 21 | A | 409.8958  | 0.2705  | 0.1528   | 0.2416   |
| 22 | A | 423.1997  | 0.2188  | 1.6613   | 0.1635   |
| 23 | A | 506.7065  | 2.5169  | 1.8449   | 0.3600   |
| 24 | A | 508.1780  | 0.3996  | 24.9806  | 6.2223   |
| 25 | A | 526.5418  | 2.9158  | 6.6564   | 3.0092   |
| 26 | A | 540.8327  | 1.0870  | 1.5039   | 5.9335   |
| 27 | A | 579.5281  | 3.4155  | 7.0167   | 13.5400  |
| 28 | A | 596.1350  | 3.7630  | 0.0749   | 2.2396   |
| 29 | A | 636.6838  | 1.5224  | 0.1234   | 4.2428   |
| 30 | A | 665.7056  | 4.4047  | 44.5633  | 0.7944   |
| 31 | A | 699.0253  | 0.5891  | 40.7128  | 3.9233   |
| 32 | A | 724.3291  | 2.8555  | 120.1671 | 77.1971  |
| 33 | A | 733.9359  | 0.4670  | 80.2662  | 45.2441  |
| 34 | A | 780.6591  | 0.6726  | 292.4266 | 69.7632  |
| 35 | A | 806.5128  | 4.9314  | 78.0038  | 35.7788  |
| 36 | A | 827.6287  | 0.5076  | 0.1839   | 0.3005   |
| 37 | A | 834.7023  | 1.2733  | 8.3503   | 33.5915  |
| 38 | A | 894.2171  | 0.7021  | 20.6910  | 4.2015   |
| 39 | A | 967.5914  | 0.7470  | 0.0678   | 0.0276   |
| 40 | A | 987.2939  | 0.7316  | 0.1103   | 0.9484   |
| 41 | A | 1017.4482 | 3.6817  | 0.3277   | 37.1847  |
| 42 | A | 1049.4552 | 1.3931  | 6.7567   | 23.1645  |
| 43 | A | 1053.6872 | 8.0857  | 33.3230  | 77.5411  |
| 44 | A | 1074.6801 | 1.0727  | 3.5130   | 0.0249   |
| 45 | A | 1110.5575 | 9.6016  | 56.8530  | 0.4123   |
| 46 | A | 1111.8797 | 9.9033  | 241.7368 | 1.4577   |
| 47 | A | 1139.8751 | 0.9580  | 5.0222   | 1.4995   |
| 48 | A | 1166.6392 | 10.4040 | 89.7187  | 0.6971   |
| 49 | A | 1182.6258 | 0.9298  | 6.5351   | 4.8701   |
| 50 | A | 1182.6788 | 8.8360  | 282.6032 | 16.9312  |
| 51 | A | 1201.5528 | 0.9591  | 7.1958   | 6.0624   |
| 52 | A | 1207.4790 | 11.2950 | 415.4870 | 1.0600   |
| 53 | A | 1245.9210 | 10.9610 | 92.7295  | 25.5552  |
| 54 | A | 1277.6502 | 3.2949  | 68.0331  | 45.6966  |
| 55 | A | 1300.4488 | 11.7802 | 199.9867 | 6.6493   |
| 56 | A | 1349.2984 | 5.5473  | 1.9160   | 3.6734   |
| 57 | A | 1369.9351 | 1.4336  | 0.0353   | 0.0974   |
| 58 | A | 1502.6899 | 3.0456  | 3.2749   | 2.1541   |
| 59 | A | 1530.8916 | 3.1942  | 58.1397  | 1.9798   |
| 60 | A | 1636.3209 | 9.0997  | 4.1973   | 4.8186   |
| 61 | A | 1645.3846 | 4.4152  | 31.9996  | 49.5999  |
| 62 | A | 1658.7224 | 2.2917  | 100.6425 | 29.7047  |
| 63 | A | 3157.3889 | 6.3849  | 14.0902  | 16.6258  |
| 64 | A | 3158.3125 | 6.3965  | 2.1122   | 81.9007  |
| 65 | A | 3173.1950 | 6.4643  | 3.1346   | 125.6285 |
| 66 | A | 3180.1265 | 6.5169  | 21.0972  | 42.0543  |
| 67 | A | 3194.4108 | 6.5991  | 10.6812  | 266.9506 |
| 68 | A | 3538.1809 | 7.7320  | 20.0270  | 182.4460 |
| 69 | A | 3629.6619 | 8.5191  | 19.2248  | 46.2240  |

-----  
ANL-nC3F7I\_s\_2

| NM# | Symm | Wavenumber | Force Const | IR Intens | Raman Activ |
|-----|------|------------|-------------|-----------|-------------|
| 1   | A    | 1.7089     | 0.0000      | 0.0636    | 0.2505      |
| 2   | A    | 14.9611    | 0.0012      | 0.0032    | 3.3074      |
| 3   | A    | 17.3010    | 0.0009      | 0.1938    | 3.3086      |
| 4   | A    | 26.4547    | 0.0037      | 0.1130    | 2.4845      |

|    |   |           |         |          |          |
|----|---|-----------|---------|----------|----------|
| 5  | A | 43.6369   | 0.0109  | 0.1672   | 3.4224   |
| 6  | A | 54.6967   | 0.0126  | 0.4020   | 1.0531   |
| 7  | A | 74.9541   | 0.0513  | 0.0011   | 0.0202   |
| 8  | A | 108.3954  | 0.0383  | 13.2850  | 16.2546  |
| 9  | A | 115.2856  | 0.1636  | 1.6336   | 0.5351   |
| 10 | A | 157.5770  | 0.3776  | 6.6035   | 18.6581  |
| 11 | A | 213.6074  | 0.4783  | 2.5344   | 0.2201   |
| 12 | A | 231.2676  | 0.5917  | 0.0872   | 0.0066   |
| 13 | A | 246.2149  | 0.1359  | 2.8370   | 12.9804  |
| 14 | A | 261.5805  | 0.8567  | 4.4034   | 49.2035  |
| 15 | A | 261.8284  | 0.6370  | 0.1678   | 2.6327   |
| 16 | A | 286.5503  | 0.8897  | 5.1041   | 0.9860   |
| 17 | A | 336.6495  | 1.2465  | 1.2588   | 2.1890   |
| 18 | A | 350.0785  | 0.0986  | 8.0089   | 0.1534   |
| 19 | A | 371.3064  | 1.5195  | 0.0965   | 1.1896   |
| 20 | A | 378.7850  | 1.2333  | 0.1979   | 0.6908   |
| 21 | A | 410.3297  | 0.2725  | 0.1293   | 0.1812   |
| 22 | A | 424.1102  | 0.2168  | 1.6857   | 0.1519   |
| 23 | A | 506.6732  | 2.4913  | 1.8604   | 0.3108   |
| 24 | A | 508.0346  | 0.3998  | 27.5467  | 9.3461   |
| 25 | A | 526.5533  | 2.8741  | 8.1727   | 3.4036   |
| 26 | A | 540.8893  | 1.0892  | 1.7319   | 6.2465   |
| 27 | A | 579.3384  | 3.4283  | 6.6128   | 16.8834  |
| 28 | A | 596.1117  | 3.7627  | 0.1058   | 2.2063   |
| 29 | A | 636.6744  | 1.5224  | 0.1247   | 4.3693   |
| 30 | A | 665.2021  | 4.2124  | 64.0612  | 1.0077   |
| 31 | A | 698.8916  | 0.5924  | 41.5652  | 5.0147   |
| 32 | A | 723.0745  | 1.8911  | 182.9633 | 95.4284  |
| 33 | A | 735.8544  | 0.5164  | 39.0164  | 42.8863  |
| 34 | A | 780.8667  | 0.7071  | 315.6604 | 82.3160  |
| 35 | A | 808.5836  | 3.7077  | 37.1384  | 13.9665  |
| 36 | A | 827.7414  | 0.5078  | 0.1278   | 0.3200   |
| 37 | A | 835.0380  | 1.2448  | 9.2749   | 35.3860  |
| 38 | A | 894.2511  | 0.7029  | 21.1701  | 4.8579   |
| 39 | A | 967.8748  | 0.7476  | 0.0629   | 0.0309   |
| 40 | A | 987.2588  | 0.7311  | 0.1018   | 1.0342   |
| 41 | A | 1017.3925 | 3.6812  | 0.3717   | 39.3750  |
| 42 | A | 1049.4139 | 1.3932  | 3.0717   | 25.3509  |
| 43 | A | 1053.9306 | 8.0704  | 25.9951  | 88.6945  |
| 44 | A | 1074.9228 | 1.0739  | 3.5467   | 0.0332   |
| 45 | A | 1111.2068 | 9.6708  | 102.9176 | 0.6778   |
| 46 | A | 1111.6003 | 9.8119  | 169.0805 | 0.5817   |
| 47 | A | 1140.0226 | 0.9581  | 6.3133   | 1.3938   |
| 48 | A | 1165.2333 | 10.3655 | 97.6904  | 0.6616   |
| 49 | A | 1182.5943 | 0.9126  | 1.0180   | 4.8327   |
| 50 | A | 1182.7278 | 10.7398 | 318.2302 | 17.7743  |
| 51 | A | 1201.4697 | 0.9589  | 6.5798   | 6.2277   |
| 52 | A | 1208.3250 | 11.3079 | 413.5761 | 1.0539   |
| 53 | A | 1246.5071 | 11.0507 | 46.9525  | 12.1052  |
| 54 | A | 1277.8560 | 3.2814  | 104.3609 | 47.7166  |
| 55 | A | 1300.5895 | 11.8747 | 204.6924 | 6.0455   |
| 56 | A | 1349.3372 | 5.5374  | 1.9628   | 4.0265   |
| 57 | A | 1369.9421 | 1.4340  | 0.0372   | 0.0970   |
| 58 | A | 1502.6769 | 3.0451  | 3.2266   | 2.2568   |
| 59 | A | 1530.9011 | 3.1952  | 62.3764  | 1.8168   |
| 60 | A | 1636.2842 | 9.0973  | 4.2740   | 4.8138   |
| 61 | A | 1645.4453 | 4.4781  | 35.4871  | 55.0102  |
| 62 | A | 1658.9601 | 2.2759  | 103.6697 | 29.8457  |
| 63 | A | 3157.5263 | 6.3855  | 14.5483  | 16.4365  |
| 64 | A | 3158.4787 | 6.3970  | 2.2033   | 82.0439  |
| 65 | A | 3173.2732 | 6.4647  | 3.1683   | 126.5141 |
| 66 | A | 3180.2047 | 6.5172  | 21.2639  | 44.3069  |
| 67 | A | 3194.4671 | 6.5993  | 11.0545  | 275.3956 |
| 68 | A | 3537.9840 | 7.7314  | 18.7247  | 177.4003 |
| 69 | A | 3629.2209 | 8.5167  | 19.1634  | 43.7432  |

ANL-nC3H7I\_d\_1

| NM# | Symm | Wavenumber | Force Const | IR Intens | Raman Activ |
|-----|------|------------|-------------|-----------|-------------|
|-----|------|------------|-------------|-----------|-------------|

|    |   |           |        |          |          |
|----|---|-----------|--------|----------|----------|
| 1  | A | 13.2228   | 0.0003 | 0.4487   | 2.0085   |
| 2  | A | 18.0242   | 0.0007 | 0.6623   | 2.9648   |
| 3  | A | 30.2872   | 0.0028 | 0.4131   | 2.0430   |
| 4  | A | 42.7825   | 0.0044 | 0.6318   | 1.7338   |
| 5  | A | 53.5924   | 0.0069 | 0.5126   | 2.1525   |
| 6  | A | 68.4071   | 0.0165 | 0.5134   | 5.5551   |
| 7  | A | 129.5014  | 0.0223 | 0.0819   | 0.4073   |
| 8  | A | 198.1943  | 0.0375 | 0.2088   | 1.9060   |
| 9  | A | 229.5660  | 0.1108 | 3.0812   | 1.7407   |
| 10 | A | 270.0972  | 0.0632 | 0.6865   | 1.7554   |
| 11 | A | 303.5440  | 0.0565 | 10.8252  | 0.0885   |
| 12 | A | 386.1820  | 0.2573 | 0.1745   | 0.4926   |
| 13 | A | 388.1049  | 0.2068 | 1.0868   | 4.3390   |
| 14 | A | 414.7538  | 0.2969 | 0.2099   | 0.0117   |
| 15 | A | 500.9224  | 0.3453 | 63.3294  | 12.7382  |
| 16 | A | 504.8170  | 0.4409 | 19.4625  | 24.3833  |
| 17 | A | 538.3805  | 1.0663 | 7.0941   | 3.1758   |
| 18 | A | 583.3585  | 0.2873 | 189.9776 | 8.2831   |
| 19 | A | 636.7505  | 1.5181 | 0.2255   | 3.0578   |
| 20 | A | 697.7849  | 0.5658 | 29.8906  | 0.3453   |
| 21 | A | 757.7558  | 0.6092 | 85.6162  | 2.6938   |
| 22 | A | 771.1785  | 0.4446 | 7.8013   | 5.5060   |
| 23 | A | 824.2815  | 0.5053 | 0.9696   | 0.3995   |
| 24 | A | 828.4891  | 0.5669 | 4.3962   | 2.6729   |
| 25 | A | 834.4791  | 1.8243 | 3.1340   | 19.8373  |
| 26 | A | 882.7104  | 0.6837 | 9.6930   | 0.3651   |
| 27 | A | 887.6006  | 0.9313 | 3.6425   | 3.2483   |
| 28 | A | 964.7233  | 0.7405 | 0.0409   | 0.0319   |
| 29 | A | 984.0655  | 0.7215 | 0.1459   | 0.3898   |
| 30 | A | 1014.9926 | 3.6308 | 1.6546   | 27.3622  |
| 31 | A | 1027.2378 | 0.8070 | 1.0255   | 2.8040   |
| 32 | A | 1046.0998 | 0.8533 | 1.3886   | 1.4140   |
| 33 | A | 1049.3251 | 1.3633 | 2.8427   | 16.7350  |
| 34 | A | 1065.7401 | 1.0522 | 2.2990   | 0.1143   |
| 35 | A | 1088.5694 | 1.4741 | 1.4124   | 2.9507   |
| 36 | A | 1135.7954 | 0.9619 | 4.1311   | 1.9524   |
| 37 | A | 1179.8008 | 0.9025 | 1.4524   | 3.4272   |
| 38 | A | 1200.8876 | 0.9580 | 8.2229   | 2.9866   |
| 39 | A | 1216.9806 | 1.2351 | 6.9004   | 5.7158   |
| 40 | A | 1228.1913 | 1.2037 | 32.7710  | 8.8731   |
| 41 | A | 1298.0452 | 2.8225 | 37.6147  | 12.6824  |
| 42 | A | 1307.5927 | 1.2136 | 34.7257  | 5.2324   |
| 43 | A | 1350.4088 | 5.9606 | 4.6209   | 0.9208   |
| 44 | A | 1368.0278 | 1.4240 | 0.0063   | 0.1879   |
| 45 | A | 1375.9254 | 1.5784 | 3.3202   | 0.4024   |
| 46 | A | 1419.9377 | 1.4780 | 5.0886   | 0.6166   |
| 47 | A | 1473.1583 | 1.4034 | 4.2315   | 11.1666  |
| 48 | A | 1478.5670 | 1.3852 | 5.0369   | 9.5599   |
| 49 | A | 1498.9241 | 1.3834 | 14.1218  | 4.0289   |
| 50 | A | 1500.9396 | 2.9795 | 2.8924   | 1.7069   |
| 51 | A | 1507.9333 | 1.4379 | 2.4760   | 2.5757   |
| 52 | A | 1532.0259 | 3.2593 | 50.3710  | 1.1591   |
| 53 | A | 1629.7628 | 8.9741 | 3.6437   | 3.7471   |
| 54 | A | 1645.2282 | 4.2591 | 20.4028  | 14.4091  |
| 55 | A | 1662.6772 | 2.3902 | 133.2143 | 23.2489  |
| 56 | A | 2991.4035 | 5.6383 | 34.0348  | 252.4383 |
| 57 | A | 3025.1408 | 5.6103 | 19.1248  | 155.9400 |
| 58 | A | 3051.9847 | 5.9757 | 8.9207   | 68.4748  |
| 59 | A | 3086.4133 | 6.1535 | 21.2733  | 71.2321  |
| 60 | A | 3092.6327 | 5.9786 | 24.9549  | 117.6769 |
| 61 | A | 3113.6167 | 6.2816 | 14.2480  | 36.2066  |
| 62 | A | 3154.0235 | 6.3644 | 13.0073  | 9.3043   |
| 63 | A | 3155.7494 | 6.3933 | 3.0039   | 96.2549  |
| 64 | A | 3155.9436 | 6.5033 | 2.9891   | 64.8507  |
| 65 | A | 3169.4047 | 6.4524 | 4.9004   | 137.7824 |
| 66 | A | 3174.6838 | 6.4960 | 29.1230  | 20.9587  |
| 67 | A | 3191.0037 | 6.5832 | 10.9668  | 223.7322 |
| 68 | A | 3568.6543 | 7.8589 | 21.6620  | 192.4562 |
| 69 | A | 3667.2497 | 8.7091 | 17.0409  | 53.7081  |

| NM# | Symm | Wavenumber | Force Const | IR Intens | Raman Activ |
|-----|------|------------|-------------|-----------|-------------|
| 1   | A    | 4.2816     | 0.0000      | 0.0019    | 0.1939      |
| 2   | A    | 9.9519     | 0.0002      | 0.4447    | 6.8384      |
| 3   | A    | 15.3350    | 0.0007      | 0.3164    | 4.5744      |
| 4   | A    | 36.7746    | 0.0052      | 0.5002    | 0.7618      |
| 5   | A    | 52.6381    | 0.0061      | 1.5256    | 0.2552      |
| 6   | A    | 82.3354    | 0.0223      | 3.1825    | 18.9072     |
| 7   | A    | 125.8756   | 0.0212      | 0.2966    | 0.7343      |
| 8   | A    | 195.5415   | 0.0364      | 0.4761    | 2.8302      |
| 9   | A    | 228.9185   | 0.1121      | 0.4467    | 5.2222      |
| 10  | A    | 270.2525   | 0.0649      | 0.1843    | 6.7672      |
| 11  | A    | 318.2993   | 0.0628      | 8.2075    | 0.3070      |
| 12  | A    | 387.0566   | 0.2183      | 0.1298    | 12.7956     |
| 13  | A    | 388.4637   | 0.2356      | 0.3201    | 5.9930      |
| 14  | A    | 415.1541   | 0.2957      | 0.1506    | 0.0113      |
| 15  | A    | 502.1498   | 0.4747      | 1.0150    | 90.6187     |
| 16  | A    | 503.7954   | 0.3514      | 63.4666   | 3.8158      |
| 17  | A    | 539.6252   | 1.1032      | 4.8005    | 3.3904      |
| 18  | A    | 609.7444   | 0.2972      | 323.5645  | 23.0573     |
| 19  | A    | 636.8017   | 1.5198      | 0.2056    | 4.0934      |
| 20  | A    | 697.4880   | 0.5575      | 30.1315   | 0.4264      |
| 21  | A    | 757.6263   | 0.6102      | 91.2293   | 2.2122      |
| 22  | A    | 772.1031   | 0.4463      | 8.9643    | 5.8365      |
| 23  | A    | 822.6353   | 0.5027      | 0.3161    | 0.4065      |
| 24  | A    | 826.7305   | 0.5577      | 3.9312    | 4.5218      |
| 25  | A    | 833.5039   | 1.8038      | 4.1612    | 20.6888     |
| 26  | A    | 881.6313   | 0.6883      | 12.6925   | 0.2272      |
| 27  | A    | 889.0688   | 0.9454      | 3.9573    | 5.6707      |
| 28  | A    | 961.5518   | 0.7352      | 0.0817    | 0.0802      |
| 29  | A    | 977.9056   | 0.7100      | 0.1488    | 0.5461      |
| 30  | A    | 1014.8049  | 3.6426      | 1.1593    | 37.9878     |
| 31  | A    | 1027.4536  | 0.8157      | 1.6868    | 3.3911      |
| 32  | A    | 1048.2305  | 0.8455      | 0.4070    | 2.8700      |
| 33  | A    | 1048.9909  | 1.3755      | 4.2661    | 18.9036     |
| 34  | A    | 1066.6109  | 1.0524      | 2.4938    | 0.0640      |
| 35  | A    | 1089.0122  | 1.4887      | 2.2655    | 4.5660      |
| 36  | A    | 1135.5248  | 0.9608      | 5.4055    | 1.8681      |
| 37  | A    | 1180.2263  | 0.9047      | 1.3530    | 4.1939      |
| 38  | A    | 1200.7142  | 0.9576      | 9.5946    | 3.4047      |
| 39  | A    | 1219.2696  | 1.2469      | 4.1574    | 11.5989     |
| 40  | A    | 1228.6601  | 1.1969      | 51.9900   | 23.2004     |
| 41  | A    | 1294.6848  | 3.0971      | 82.4299   | 16.7562     |
| 42  | A    | 1308.6579  | 1.1707      | 29.4260   | 5.6817      |
| 43  | A    | 1349.6570  | 5.8996      | 4.3811    | 1.8689      |
| 44  | A    | 1368.1487  | 1.4247      | 0.0036    | 0.1622      |
| 45  | A    | 1376.2877  | 1.5724      | 6.3404    | 1.3596      |
| 46  | A    | 1416.3438  | 1.4834      | 11.9075   | 1.0777      |
| 47  | A    | 1473.0998  | 1.4039      | 3.3335    | 15.0536     |
| 48  | A    | 1480.0638  | 1.3856      | 3.8139    | 14.9089     |
| 49  | A    | 1499.7670  | 1.3847      | 8.9625    | 6.6694      |
| 50  | A    | 1501.3063  | 3.0757      | 2.0138    | 1.7639      |
| 51  | A    | 1507.5855  | 1.4151      | 6.0645    | 3.6409      |
| 52  | A    | 1531.4276  | 3.2431      | 64.7278   | 1.8640      |
| 53  | A    | 1630.8742  | 9.0052      | 4.6880    | 4.3446      |
| 54  | A    | 1645.4396  | 4.2498      | 34.9976   | 25.5035     |
| 55  | A    | 1661.8085  | 2.3833      | 132.8519  | 28.6918     |
| 56  | A    | 2994.0793  | 5.6474      | 32.3881   | 298.7552    |
| 57  | A    | 3024.6133  | 5.5916      | 23.8843   | 189.6613    |
| 58  | A    | 3050.6769  | 5.9758      | 8.2057    | 88.3553     |
| 59  | A    | 3086.0755  | 6.1048      | 15.6540   | 112.3070    |
| 60  | A    | 3090.4019  | 6.0220      | 35.4639   | 88.4635     |
| 61  | A    | 3099.5653  | 6.2350      | 30.5072   | 35.7209     |
| 62  | A    | 3151.6147  | 6.4949      | 5.3265    | 57.2200     |
| 63  | A    | 3154.0306  | 6.3655      | 16.3743   | 9.4023      |
| 64  | A    | 3155.5053  | 6.3815      | 1.6473    | 97.8004     |
| 65  | A    | 3169.4552  | 6.4514      | 5.1181    | 139.7168    |
| 66  | A    | 3175.2381  | 6.4978      | 29.9697   | 31.8895     |
| 67  | A    | 3191.1321  | 6.5842      | 13.4478   | 270.5583    |

|    |   |           |        |         |          |
|----|---|-----------|--------|---------|----------|
| 68 | A | 3563.9009 | 7.8388 | 17.2799 | 179.5540 |
| 69 | A | 3661.8645 | 8.6822 | 17.2229 | 46.6296  |

ANL-nC3H7I\_s\_1

| NM# | Symm | Wavenumber | Force Const | IR Intens | Raman Activ |
|-----|------|------------|-------------|-----------|-------------|
| 1   | A    | 6.1740     | 0.0001      | 0.2129    | 1.3044      |
| 2   | A    | 12.4458    | 0.0004      | 0.3083    | 4.5191      |
| 3   | A    | 13.0689    | 0.0003      | 0.2878    | 6.6235      |
| 4   | A    | 36.4781    | 0.0062      | 0.3744    | 0.4547      |
| 5   | A    | 49.5284    | 0.0040      | 0.8890    | 0.0872      |
| 6   | A    | 82.7769    | 0.0225      | 2.9433    | 17.8064     |
| 7   | A    | 113.9348   | 0.0202      | 1.0609    | 0.1727      |
| 8   | A    | 198.7020   | 0.0829      | 0.8335    | 3.3326      |
| 9   | A    | 229.2042   | 0.1135      | 0.4567    | 7.0755      |
| 10  | A    | 238.5418   | 0.0363      | 0.0375    | 0.0395      |
| 11  | A    | 279.1683   | 0.1691      | 0.1070    | 28.5706     |
| 12  | A    | 318.6002   | 0.0629      | 8.3897    | 0.2758      |
| 13  | A    | 387.9722   | 0.2573      | 0.1262    | 0.4430      |
| 14  | A    | 415.0924   | 0.2954      | 0.1596    | 0.0172      |
| 15  | A    | 503.7660   | 0.3511      | 63.3715   | 4.3180      |
| 16  | A    | 539.5495   | 1.1015      | 4.3675    | 3.8137      |
| 17  | A    | 594.9912   | 0.6788      | 42.5587   | 99.8724     |
| 18  | A    | 610.9607   | 0.3146      | 262.8732  | 7.9538      |
| 19  | A    | 636.8273   | 1.5198      | 0.2091    | 3.9137      |
| 20  | A    | 697.5225   | 0.5564      | 30.3059   | 0.4122      |
| 21  | A    | 733.5913   | 0.3468      | 3.5649    | 0.1269      |
| 22  | A    | 757.6783   | 0.6113      | 90.3773   | 2.0494      |
| 23  | A    | 822.6393   | 0.5021      | 0.2136    | 0.3806      |
| 24  | A    | 833.4889   | 1.8043      | 3.5918    | 20.5685     |
| 25  | A    | 836.1583   | 0.4882      | 0.0462    | 0.5442      |
| 26  | A    | 881.6242   | 0.6885      | 13.0528   | 0.3029      |
| 27  | A    | 900.6267   | 0.9264      | 5.7913    | 0.5361      |
| 28  | A    | 961.5199   | 0.7351      | 0.0856    | 0.0593      |
| 29  | A    | 978.0491   | 0.7103      | 0.1524    | 0.5172      |
| 30  | A    | 1014.8602  | 3.6437      | 1.1612    | 35.1825     |
| 31  | A    | 1028.0578  | 0.6880      | 1.2647    | 1.1141      |
| 32  | A    | 1029.9393  | 1.7958      | 0.4906    | 29.4295     |
| 33  | A    | 1048.9923  | 1.3756      | 3.9668    | 18.0234     |
| 34  | A    | 1066.4348  | 1.0514      | 2.5008    | 0.0646      |
| 35  | A    | 1105.8758  | 1.4341      | 2.0984    | 5.3234      |
| 36  | A    | 1135.4107  | 0.9609      | 5.2805    | 1.9176      |
| 37  | A    | 1180.1943  | 0.9046      | 1.3428    | 3.9852      |
| 38  | A    | 1200.7320  | 0.9576      | 9.3443    | 3.3587      |
| 39  | A    | 1215.3174  | 1.0857      | 72.6446   | 32.8640     |
| 40  | A    | 1237.1834  | 1.3097      | 0.3676    | 0.5271      |
| 41  | A    | 1294.9315  | 3.2220      | 66.0700   | 15.2982     |
| 42  | A    | 1323.5165  | 1.1402      | 0.2987    | 6.6115      |
| 43  | A    | 1349.6807  | 5.9078      | 4.3594    | 1.6103      |
| 44  | A    | 1359.4215  | 1.5099      | 1.3250    | 19.0214     |
| 45  | A    | 1368.1369  | 1.4246      | 0.0037    | 0.1645      |
| 46  | A    | 1410.7550  | 1.4339      | 2.3245    | 0.7948      |
| 47  | A    | 1479.8480  | 1.4259      | 1.3849    | 9.6551      |
| 48  | A    | 1494.1327  | 1.3807      | 2.1087    | 12.4915     |
| 49  | A    | 1498.8880  | 1.3753      | 8.8980    | 9.7549      |
| 50  | A    | 1501.2957  | 3.0773      | 2.0618    | 1.6786      |
| 51  | A    | 1509.2198  | 1.4564      | 7.7628    | 0.7594      |
| 52  | A    | 1531.4238  | 3.2429      | 60.4923   | 2.0203      |
| 53  | A    | 1630.8816  | 9.0075      | 4.5638    | 4.2850      |
| 54  | A    | 1645.4196  | 4.2454      | 32.0535   | 22.7117     |
| 55  | A    | 1661.7710  | 2.3847      | 128.4532  | 27.4657     |
| 56  | A    | 3019.9511  | 5.5613      | 36.0892   | 197.9388    |
| 57  | A    | 3037.6062  | 5.7605      | 6.3515    | 78.1714     |
| 58  | A    | 3063.1871  | 6.0972      | 0.1637    | 102.3250    |
| 59  | A    | 3084.1767  | 5.9637      | 11.0646   | 129.2519    |
| 60  | A    | 3087.8985  | 6.2009      | 39.3937   | 10.5899     |
| 61  | A    | 3089.0299  | 6.1404      | 37.9036   | 109.9432    |
| 62  | A    | 3146.9476  | 6.4802      | 8.2809    | 50.7233     |
| 63  | A    | 3154.0768  | 6.3654      | 15.3816   | 9.5366      |



|    |   |           |        |         |          |
|----|---|-----------|--------|---------|----------|
| 64 | A | 3155.5999 | 6.3818 | 1.5489  | 95.5589  |
| 65 | A | 3169.4333 | 6.4515 | 5.1464  | 139.5957 |
| 66 | A | 3175.1730 | 6.4976 | 29.8778 | 28.9167  |
| 67 | A | 3191.0464 | 6.5838 | 12.9302 | 259.9994 |
| 68 | A | 3563.9207 | 7.8389 | 19.5382 | 185.3854 |
| 69 | A | 3661.9361 | 8.6827 | 17.5971 | 49.1247  |

ANL-nC3H7I\_s\_2

| NM# | Symm | Wavenumber | Force Const | IR Intens | Raman Activ |
|-----|------|------------|-------------|-----------|-------------|
| 1   | A    | 2.5939     | 0.0000      | 0.0428    | 0.4872      |
| 2   | A    | 8.3854     | 0.0001      | 0.3418    | 7.2349      |
| 3   | A    | 13.7503    | 0.0006      | 0.2767    | 4.6519      |
| 4   | A    | 35.7028    | 0.0056      | 0.3485    | 0.7116      |
| 5   | A    | 49.8082    | 0.0041      | 0.9177    | 0.0635      |
| 6   | A    | 82.8687    | 0.0225      | 3.5106    | 20.0272     |
| 7   | A    | 114.1851   | 0.0202      | 1.0353    | 0.1995      |
| 8   | A    | 199.1373   | 0.0833      | 1.1373    | 5.0015      |
| 9   | A    | 229.2159   | 0.1132      | 0.2588    | 5.4788      |
| 10  | A    | 238.1126   | 0.0362      | 0.0403    | 0.0258      |
| 11  | A    | 278.9319   | 0.1698      | 0.1928    | 34.5692     |
| 12  | A    | 319.4546   | 0.0633      | 8.2535    | 0.3225      |
| 13  | A    | 388.1626   | 0.2573      | 0.1269    | 0.5232      |
| 14  | A    | 415.1365   | 0.2953      | 0.1566    | 0.0099      |
| 15  | A    | 503.9464   | 0.3524      | 62.3310   | 3.9767      |
| 16  | A    | 539.6481   | 1.1029      | 4.5816    | 3.4249      |
| 17  | A    | 596.0589   | 0.7745      | 5.4779    | 107.9775    |
| 18  | A    | 611.6378   | 0.2984      | 327.9822  | 26.1363     |
| 19  | A    | 636.8086   | 1.5198      | 0.2081    | 4.1163      |
| 20  | A    | 697.6367   | 0.5550      | 30.3780   | 0.4449      |
| 21  | A    | 733.7192   | 0.3469      | 3.6229    | 0.1124      |
| 22  | A    | 757.8668   | 0.6126      | 90.6449   | 2.1828      |
| 23  | A    | 822.5395   | 0.5021      | 0.1655    | 0.3826      |
| 24  | A    | 833.4690   | 1.8015      | 4.1225    | 20.8547     |
| 25  | A    | 836.4045   | 0.4882      | 0.0210    | 0.6687      |
| 26  | A    | 881.6387   | 0.6891      | 12.8449   | 0.2689      |
| 27  | A    | 900.8415   | 0.9260      | 6.2900    | 0.2082      |
| 28  | A    | 961.5764   | 0.7354      | 0.0817    | 0.0725      |
| 29  | A    | 978.1330   | 0.7108      | 0.1480    | 0.5851      |
| 30  | A    | 1014.8206  | 3.6430      | 1.1581    | 37.9447     |
| 31  | A    | 1028.2323  | 0.6886      | 1.4114    | 1.1303      |
| 32  | A    | 1030.1492  | 1.7930      | 0.6098    | 33.1639     |
| 33  | A    | 1048.9644  | 1.3754      | 4.2686    | 19.1138     |
| 34  | A    | 1066.6628  | 1.0523      | 2.5378    | 0.0594      |
| 35  | A    | 1106.3657  | 1.4358      | 2.8686    | 4.7486      |
| 36  | A    | 1135.4573  | 0.9605      | 5.4148    | 1.8755      |
| 37  | A    | 1180.2422  | 0.9048      | 1.3553    | 4.2351      |
| 38  | A    | 1200.6544  | 0.9575      | 9.7342    | 3.5188      |
| 39  | A    | 1215.9289  | 1.0869      | 76.5652   | 37.7751     |
| 40  | A    | 1237.5207  | 1.3102      | 0.2417    | 0.5157      |
| 41  | A    | 1294.8371  | 3.2196      | 74.1739   | 16.4908     |
| 42  | A    | 1322.7490  | 1.1391      | 0.3221    | 7.1234      |
| 43  | A    | 1349.6287  | 5.8980      | 4.3754    | 1.9699      |
| 44  | A    | 1358.5988  | 1.5111      | 1.7259    | 22.3758     |
| 45  | A    | 1368.1310  | 1.4248      | 0.0035    | 0.1611      |
| 46  | A    | 1410.8672  | 1.4339      | 2.5882    | 0.9022      |
| 47  | A    | 1479.8447  | 1.4261      | 2.1519    | 10.6752     |
| 48  | A    | 1494.1142  | 1.3810      | 2.0899    | 13.0790     |
| 49  | A    | 1498.7345  | 1.3750      | 9.0044    | 10.5491     |
| 50  | A    | 1501.3035  | 3.0764      | 1.9914    | 1.8554      |
| 51  | A    | 1509.1152  | 1.4557      | 6.5532    | 1.0398      |
| 52  | A    | 1531.4009  | 3.2428      | 65.7441   | 1.9552      |
| 53  | A    | 1630.9159  | 9.0072      | 4.6950    | 4.3487      |
| 54  | A    | 1645.4395  | 4.2622      | 35.9606   | 26.1585     |
| 55  | A    | 1661.7958  | 2.3792      | 132.9796  | 28.8994     |
| 56  | A    | 3020.2271  | 5.5620      | 35.7897   | 213.8377    |
| 57  | A    | 3036.2313  | 5.7548      | 9.4724    | 84.9729     |
| 58  | A    | 3062.4267  | 6.0947      | 0.0046    | 103.6091    |
| 59  | A    | 3084.3683  | 5.9713      | 10.8923   | 133.5492    |

|    |   |           |        |         |          |
|----|---|-----------|--------|---------|----------|
| 60 | A | 3087.8476 | 6.2001 | 41.1699 | 12.8737  |
| 61 | A | 3088.9479 | 6.1336 | 39.6595 | 130.2324 |
| 62 | A | 3147.1291 | 6.4808 | 7.9399  | 39.6181  |
| 63 | A | 3154.0786 | 6.3657 | 16.3954 | 9.4221   |
| 64 | A | 3155.5455 | 6.3817 | 1.6750  | 97.4932  |
| 65 | A | 3169.4985 | 6.4516 | 5.0796  | 140.2952 |
| 66 | A | 3175.2871 | 6.4980 | 29.9642 | 32.0234  |
| 67 | A | 3191.1715 | 6.5844 | 13.4301 | 270.5682 |
| 68 | A | 3563.6243 | 7.8377 | 17.5545 | 181.6161 |
| 69 | A | 3661.5388 | 8.6806 | 17.3645 | 46.9218  |

-----  
pyCH3-iC3H7I  
-----

| NM# | Symm | Wavenumber | Force Const | IR Intens | Raman Activ |
|-----|------|------------|-------------|-----------|-------------|
| 1   | A    | -1.2377    | 0.0000      | 0.0027    | 1.6988      |
| 2   | A    | 8.8002     | 0.0002      | 1.1536    | 0.4283      |
| 3   | A    | 17.2346    | 0.0008      | 1.8324    | 0.2644      |
| 4   | A    | 25.8740    | 0.0004      | 0.2074    | 1.1255      |
| 5   | A    | 55.1623    | 0.0118      | 1.6436    | 3.0591      |
| 6   | A    | 57.9868    | 0.0143      | 1.7002    | 4.5007      |
| 7   | A    | 61.4360    | 0.0123      | 0.0649    | 0.2567      |
| 8   | A    | 213.0162   | 0.1011      | 0.0069    | 1.2125      |
| 9   | A    | 249.6421   | 0.0817      | 0.0351    | 21.6531     |
| 10  | A    | 251.0047   | 0.0400      | 0.0210    | 0.2652      |
| 11  | A    | 265.8876   | 0.1098      | 0.1533    | 1.1557      |
| 12  | A    | 281.3381   | 0.0590      | 0.0795    | 14.9128     |
| 13  | A    | 344.0061   | 0.1779      | 0.0110    | 0.1402      |
| 14  | A    | 387.5491   | 0.2303      | 0.0025    | 0.0940      |
| 15  | A    | 398.9015   | 0.2076      | 0.9470    | 4.5968      |
| 16  | A    | 491.5168   | 0.4094      | 4.9293    | 74.7773     |
| 17  | A    | 495.3231   | 0.4198      | 16.2258   | 45.0483     |
| 18  | A    | 529.1400   | 0.9067      | 10.5115   | 13.3788     |
| 19  | A    | 685.9858   | 1.9203      | 0.0034    | 4.8473      |
| 20  | A    | 739.6573   | 1.1130      | 3.0549    | 0.7081      |
| 21  | A    | 807.2149   | 0.5658      | 28.0062   | 5.8172      |
| 22  | A    | 818.1694   | 1.1586      | 16.0521   | 19.9141     |
| 23  | A    | 881.1752   | 0.5708      | 0.0117    | 0.0402      |
| 24  | A    | 886.4212   | 1.2447      | 3.8685    | 27.6055     |
| 25  | A    | 941.6775   | 0.5980      | 0.9307    | 0.2476      |
| 26  | A    | 961.0772   | 0.7745      | 0.4278    | 0.9975      |
| 27  | A    | 972.0624   | 0.7206      | 0.1011    | 0.5800      |
| 28  | A    | 995.4278   | 0.8499      | 0.0000    | 0.0872      |
| 29  | A    | 1005.7219  | 0.8586      | 0.0025    | 0.0396      |
| 30  | A    | 1019.4118  | 4.5157      | 16.2980   | 27.8598     |
| 31  | A    | 1037.6898  | 0.7581      | 6.0408    | 5.0684      |
| 32  | A    | 1060.0224  | 1.0397      | 7.1043    | 0.9178      |
| 33  | A    | 1096.4854  | 1.3714      | 9.9492    | 12.4350     |
| 34  | A    | 1117.9099  | 1.0512      | 0.0500    | 0.0510      |
| 35  | A    | 1136.2567  | 1.7779      | 0.4017    | 2.1925      |
| 36  | A    | 1172.4374  | 1.4598      | 69.6823   | 43.0041     |
| 37  | A    | 1232.1962  | 1.2151      | 76.8047   | 33.0670     |
| 38  | A    | 1240.6907  | 1.8571      | 3.5609    | 48.4827     |
| 39  | A    | 1246.8320  | 1.4869      | 7.0962    | 4.9710      |
| 40  | A    | 1285.4313  | 8.8260      | 0.0029    | 0.8874      |
| 41  | A    | 1355.4953  | 1.4374      | 0.9585    | 2.9314      |
| 42  | A    | 1359.6518  | 1.4489      | 0.2842    | 1.9743      |
| 43  | A    | 1406.1726  | 1.4685      | 11.4483   | 2.4349      |
| 44  | A    | 1414.7517  | 1.4730      | 2.2616    | 20.0226     |
| 45  | A    | 1421.4653  | 1.4561      | 5.5283    | 5.9286      |
| 46  | A    | 1444.0772  | 2.3292      | 10.3319   | 1.7097      |
| 47  | A    | 1482.6009  | 1.3520      | 3.2768    | 6.5994      |
| 48  | A    | 1487.1705  | 1.3622      | 0.2310    | 9.3530      |
| 49  | A    | 1488.9171  | 1.4677      | 21.6908   | 6.1986      |
| 50  | A    | 1491.3003  | 1.3797      | 7.8855    | 10.6499     |
| 51  | A    | 1495.1194  | 1.3728      | 12.6652   | 13.8856     |
| 52  | A    | 1506.0380  | 1.3969      | 5.5877    | 1.9456      |
| 53  | A    | 1528.5873  | 3.0544      | 0.8047    | 5.7429      |
| 54  | A    | 1605.3556  | 9.0522      | 10.0490   | 6.4466      |
| 55  | A    | 1641.2714  | 8.6535      | 81.4498   | 22.6151     |

|    |   |           |        |         |          |
|----|---|-----------|--------|---------|----------|
| 56 | A | 3004.7421 | 5.5578 | 14.9469 | 48.4298  |
| 57 | A | 3010.1678 | 5.5747 | 90.4033 | 674.7131 |
| 58 | A | 3026.5350 | 5.6105 | 19.0301 | 274.3602 |
| 59 | A | 3072.1603 | 6.0598 | 11.6484 | 169.6698 |
| 60 | A | 3074.4552 | 6.0742 | 3.5894  | 12.6963  |
| 61 | A | 3082.7165 | 6.1326 | 15.2323 | 87.3523  |
| 62 | A | 3093.5098 | 6.1419 | 18.6894 | 124.1126 |
| 63 | A | 3108.9878 | 6.2805 | 12.5667 | 66.6102  |
| 64 | A | 3109.1179 | 6.2747 | 14.2968 | 29.7614  |
| 65 | A | 3116.7306 | 6.2911 | 27.1423 | 48.4296  |
| 66 | A | 3147.7553 | 6.3450 | 12.2059 | 77.6039  |
| 67 | A | 3149.5461 | 6.3698 | 2.7354  | 17.6254  |
| 68 | A | 3171.9444 | 6.4799 | 30.4826 | 39.7610  |
| 69 | A | 3174.3446 | 6.5044 | 5.9306  | 272.6369 |

-----  
pyCH3\_nC3F7I\_d

| NM# | Symm | Wavenumber | Force Const | IR Intens | Raman Activ |
|-----|------|------------|-------------|-----------|-------------|
| 1   | A    | 3.3312     | 0.0000      | 0.0127    | 5.2636      |
| 2   | A    | 13.1535    | 0.0013      | 0.1136    | 0.1842      |
| 3   | A    | 16.7113    | 0.0014      | 0.1899    | 0.4291      |
| 4   | A    | 23.2010    | 0.0026      | 0.1096    | 0.5492      |
| 5   | A    | 24.6429    | 0.0004      | 0.2273    | 1.1312      |
| 6   | A    | 67.9746    | 0.0201      | 0.6341    | 0.3755      |
| 7   | A    | 72.1484    | 0.0272      | 0.2897    | 0.5573      |
| 8   | A    | 79.8544    | 0.0327      | 6.6101    | 1.3210      |
| 9   | A    | 91.0658    | 0.0489      | 1.1716    | 0.5640      |
| 10  | A    | 123.8596   | 0.1760      | 3.8384    | 1.1988      |
| 11  | A    | 160.1835   | 0.2817      | 1.1328    | 2.8480      |
| 12  | A    | 220.0014   | 0.4412      | 0.5662    | 3.2313      |
| 13  | A    | 223.4229   | 0.1262      | 0.5482    | 1.2928      |
| 14  | A    | 236.5626   | 0.7088      | 6.9670    | 47.7956     |
| 15  | A    | 258.0098   | 0.7157      | 3.8702    | 5.0758      |
| 16  | A    | 276.2752   | 0.8282      | 6.5904    | 4.3259      |
| 17  | A    | 302.4393   | 1.0071      | 1.6433    | 0.9587      |
| 18  | A    | 324.5399   | 1.0923      | 0.7374    | 2.8801      |
| 19  | A    | 346.4226   | 0.2063      | 0.0048    | 0.2694      |
| 20  | A    | 347.9077   | 0.7226      | 0.0749    | 1.2969      |
| 21  | A    | 391.1483   | 0.2372      | 0.0034    | 0.0558      |
| 22  | A    | 396.1780   | 1.6603      | 0.3944    | 1.8665      |
| 23  | A    | 460.3292   | 2.2213      | 1.7103    | 4.0023      |
| 24  | A    | 496.3143   | 0.4227      | 19.0240   | 0.9452      |
| 25  | A    | 527.5056   | 2.9372      | 9.8865    | 0.7483      |
| 26  | A    | 535.3736   | 0.9255      | 17.7581   | 7.3312      |
| 27  | A    | 577.7684   | 3.5123      | 0.8164    | 8.9640      |
| 28  | A    | 611.9062   | 3.8366      | 5.7574    | 1.2773      |
| 29  | A    | 644.5499   | 4.2845      | 8.2305    | 10.4120     |
| 30  | A    | 684.7652   | 1.9136      | 0.0220    | 5.2924      |
| 31  | A    | 738.7579   | 1.0939      | 4.4863    | 1.6159      |
| 32  | A    | 740.6626   | 5.3184      | 40.4793   | 16.0884     |
| 33  | A    | 811.3918   | 0.5942      | 27.4069   | 9.0576      |
| 34  | A    | 821.7080   | 1.1124      | 17.5391   | 28.9841     |
| 35  | A    | 875.5709   | 6.0362      | 188.6400  | 46.4611     |
| 36  | A    | 882.6164   | 0.5722      | 0.0218    | 0.0403      |
| 37  | A    | 975.5040   | 0.7281      | 0.0854    | 0.5284      |
| 38  | A    | 997.0411   | 0.8476      | 0.0014    | 0.0395      |
| 39  | A    | 1007.7939  | 0.8604      | 0.0383    | 0.0885      |
| 40  | A    | 1017.8625  | 8.0152      | 224.2870  | 25.2261     |
| 41  | A    | 1026.9752  | 4.7000      | 22.2220   | 25.0180     |
| 42  | A    | 1060.8087  | 1.0528      | 6.8417    | 0.6168      |
| 43  | A    | 1093.2157  | 5.4816      | 101.5048  | 2.3341      |
| 44  | A    | 1095.8038  | 1.7902      | 15.7383   | 12.1906     |
| 45  | A    | 1101.1736  | 5.2990      | 12.1551   | 18.8259     |
| 46  | A    | 1124.2138  | 1.0586      | 0.1285    | 0.0585      |
| 47  | A    | 1151.0519  | 10.1939     | 137.8155  | 9.7418      |
| 48  | A    | 1185.4968  | 10.7298     | 507.0448  | 4.2910      |
| 49  | A    | 1199.9725  | 11.0845     | 313.0836  | 3.6271      |
| 50  | A    | 1230.7173  | 7.7329      | 159.7981  | 20.5807     |
| 51  | A    | 1240.7891  | 1.8038      | 5.9778    | 32.4175     |

|    |   |           |         |         |          |
|----|---|-----------|---------|---------|----------|
| 52 | A | 1248.4428 | 1.6018  | 4.3069  | 14.7342  |
| 53 | A | 1289.1250 | 8.7981  | 0.1886  | 0.1870   |
| 54 | A | 1318.5452 | 12.7780 | 71.9734 | 12.5539  |
| 55 | A | 1360.9659 | 1.4502  | 0.4280  | 1.6944   |
| 56 | A | 1415.8941 | 1.4704  | 3.2024  | 24.0065  |
| 57 | A | 1447.7669 | 2.3333  | 11.6514 | 1.5338   |
| 58 | A | 1488.0783 | 1.4829  | 23.5780 | 5.7440   |
| 59 | A | 1491.5738 | 1.3823  | 8.3930  | 10.5833  |
| 60 | A | 1532.0577 | 3.0595  | 0.3862  | 3.3713   |
| 61 | A | 1604.7896 | 8.9247  | 8.2757  | 7.9209   |
| 62 | A | 1646.0794 | 8.6185  | 87.4224 | 20.7033  |
| 63 | A | 3029.0735 | 5.6213  | 13.9557 | 288.9150 |
| 64 | A | 3086.4437 | 6.1459  | 13.2037 | 88.9540  |
| 65 | A | 3113.4901 | 6.3001  | 11.5483 | 67.8951  |
| 66 | A | 3157.5996 | 6.3875  | 6.4940  | 61.3000  |
| 67 | A | 3159.0330 | 6.4097  | 0.2369  | 13.0759  |
| 68 | A | 3179.3531 | 6.5126  | 19.5865 | 45.8630  |
| 69 | A | 3181.5749 | 6.5365  | 6.8600  | 262.0310 |

-----  
pyCH3\_nC3F7I\_s

| NM# | Symm | Wavenumber | Force Const | IR Intens | Raman Activ |
|-----|------|------------|-------------|-----------|-------------|
| 1   | A    | 3.9059     | 0.0000      | 0.0027    | 5.0500      |
| 2   | A    | 15.2220    | 0.0013      | 0.2175    | 0.0607      |
| 3   | A    | 16.8655    | 0.0013      | 0.4213    | 1.4715      |
| 4   | A    | 24.2965    | 0.0004      | 0.2274    | 1.0988      |
| 5   | A    | 28.6193    | 0.0058      | 0.0052    | 0.1695      |
| 6   | A    | 63.7461    | 0.0152      | 0.3087    | 0.5572      |
| 7   | A    | 66.9463    | 0.0347      | 0.0129    | 0.1223      |
| 8   | A    | 77.6939    | 0.0287      | 7.8654    | 1.1763      |
| 9   | A    | 95.7254    | 0.0461      | 0.2359    | 0.0005      |
| 10  | A    | 118.5519   | 0.1476      | 1.4437    | 0.6751      |
| 11  | A    | 156.7634   | 0.3700      | 7.9386    | 18.0918     |
| 12  | A    | 214.5851   | 0.4933      | 2.0232    | 0.2512      |
| 13  | A    | 224.4903   | 0.1192      | 0.2706    | 1.4032      |
| 14  | A    | 231.2120   | 0.5918      | 0.1017    | 0.0043      |
| 15  | A    | 261.5779   | 0.8420      | 7.7742    | 47.8538     |
| 16  | A    | 264.6176   | 0.7908      | 0.2133    | 1.4404      |
| 17  | A    | 286.3084   | 0.8870      | 4.3313    | 1.4940      |
| 18  | A    | 336.5489   | 1.2460      | 1.2160    | 1.4485      |
| 19  | A    | 346.4120   | 0.1819      | 0.0010    | 0.1406      |
| 20  | A    | 371.1971   | 1.5190      | 0.0371    | 1.2782      |
| 21  | A    | 380.2448   | 1.5148      | 0.2661    | 0.5238      |
| 22  | A    | 391.3651   | 0.2374      | 0.0059    | 0.0746      |
| 23  | A    | 496.2156   | 0.4217      | 19.5868   | 0.8009      |
| 24  | A    | 506.2827   | 2.6938      | 1.4742    | 0.3303      |
| 25  | A    | 526.3872   | 2.9121      | 6.3714    | 2.9567      |
| 26  | A    | 535.2336   | 0.9249      | 18.0419   | 7.7145      |
| 27  | A    | 577.8135   | 3.4108      | 5.1773    | 13.3897     |
| 28  | A    | 595.8424   | 3.7684      | 0.0953    | 2.3347      |
| 29  | A    | 664.7448   | 4.4004      | 45.7186   | 1.0359      |
| 30  | A    | 684.7848   | 1.9136      | 0.0171    | 5.2388      |
| 31  | A    | 724.8258   | 4.9008      | 97.2820   | 41.5614     |
| 32  | A    | 739.2767   | 1.0891      | 2.9813    | 0.4768      |
| 33  | A    | 806.8358   | 4.9846      | 110.6326  | 45.6839     |
| 34  | A    | 811.3147   | 0.5994      | 30.6888   | 10.9781     |
| 35  | A    | 821.9431   | 1.1187      | 14.1785   | 21.5614     |
| 36  | A    | 882.6841   | 0.5723      | 0.0054    | 0.0354      |
| 37  | A    | 975.4493   | 0.7284      | 0.0731    | 0.4629      |
| 38  | A    | 997.2055   | 0.8484      | 0.0000    | 0.0477      |
| 39  | A    | 1007.7524  | 0.8602      | 0.0074    | 0.0725      |
| 40  | A    | 1026.1745  | 4.6193      | 30.6338   | 10.8281     |
| 41  | A    | 1055.3047  | 8.3775      | 29.7995   | 96.6807     |
| 42  | A    | 1060.9595  | 1.0555      | 8.1842    | 1.2417      |
| 43  | A    | 1096.0911  | 1.4094      | 31.6796   | 19.2226     |
| 44  | A    | 1102.3229  | 9.2605      | 61.4271   | 0.5649      |
| 45  | A    | 1108.4088  | 9.2749      | 225.0184  | 0.3386      |
| 46  | A    | 1124.0902  | 1.0590      | 0.6615    | 0.0239      |
| 47  | A    | 1162.9484  | 10.3458     | 98.0947   | 0.7061      |

|    |   |           |         |          |          |
|----|---|-----------|---------|----------|----------|
| 48 | A | 1180.6499 | 10.8371 | 318.9525 | 16.0410  |
| 49 | A | 1206.4129 | 11.2709 | 408.1789 | 1.0968   |
| 50 | A | 1239.3068 | 1.7439  | 53.5591  | 48.6709  |
| 51 | A | 1246.2768 | 5.8299  | 37.7776  | 1.9109   |
| 52 | A | 1248.7909 | 1.7814  | 8.0815   | 20.8524  |
| 53 | A | 1289.0467 | 8.8002  | 0.1918   | 0.1521   |
| 54 | A | 1301.0997 | 12.2776 | 230.1589 | 7.2400   |
| 55 | A | 1360.9182 | 1.4500  | 0.4219   | 1.6759   |
| 56 | A | 1415.8603 | 1.4705  | 3.1858   | 24.0916  |
| 57 | A | 1447.6566 | 2.3336  | 11.7456  | 1.4688   |
| 58 | A | 1488.1000 | 1.4825  | 23.6231  | 5.7940   |
| 59 | A | 1491.5669 | 1.3822  | 8.3831   | 10.6281  |
| 60 | A | 1531.9532 | 3.0596  | 0.3475   | 3.4979   |
| 61 | A | 1604.8149 | 8.9302  | 8.4004   | 7.9476   |
| 62 | A | 1645.9520 | 8.6205  | 87.8427  | 20.4111  |
| 63 | A | 3029.0175 | 5.6211  | 14.1297  | 289.5257 |
| 64 | A | 3086.3620 | 6.1457  | 13.3186  | 89.1125  |
| 65 | A | 3113.3860 | 6.2996  | 11.6126  | 68.4007  |
| 66 | A | 3157.5148 | 6.3870  | 6.5723   | 60.4154  |
| 67 | A | 3158.9344 | 6.4092  | 0.1634   | 13.2622  |
| 68 | A | 3179.1827 | 6.5119  | 19.9132  | 47.1420  |
| 69 | A | 3181.4165 | 6.5359  | 7.2161   | 263.0742 |

-----  
pyCH3-nC3H7I\_d  
-----

| NM# | Symm | Wavenumber | Force Const | IR Intens | Raman Activ |
|-----|------|------------|-------------|-----------|-------------|
| 1   | A    | 4.4248     | 0.0000      | 0.0284    | 4.5506      |
| 2   | A    | 12.5961    | 0.0003      | 1.2319    | 0.4218      |
| 3   | A    | 16.6464    | 0.0007      | 1.5590    | 0.9284      |
| 4   | A    | 23.8657    | 0.0003      | 0.1912    | 1.1568      |
| 5   | A    | 52.1710    | 0.0091      | 0.4998    | 1.7849      |
| 6   | A    | 59.4930    | 0.0181      | 2.7548    | 4.0364      |
| 7   | A    | 70.9348    | 0.0115      | 0.2470    | 0.6221      |
| 8   | A    | 128.5318   | 0.0231      | 0.1901    | 0.9685      |
| 9   | A    | 196.0816   | 0.0373      | 0.1387    | 3.0210      |
| 10  | A    | 214.0444   | 0.0990      | 0.0177    | 1.3391      |
| 11  | A    | 270.7792   | 0.0654      | 0.0945    | 8.7867      |
| 12  | A    | 344.0373   | 0.1779      | 0.0102    | 0.1747      |
| 13  | A    | 387.5376   | 0.2157      | 0.1320    | 11.6450     |
| 14  | A    | 387.6013   | 0.2149      | 0.1875    | 11.9057     |
| 15  | A    | 494.0573   | 0.4244      | 16.5320   | 5.6382      |
| 16  | A    | 504.5818   | 0.4762      | 1.9382    | 106.6445    |
| 17  | A    | 529.3287   | 0.9069      | 10.2725   | 13.4589     |
| 18  | A    | 685.9620   | 1.9193      | 0.0038    | 4.9261      |
| 19  | A    | 739.8622   | 1.1106      | 3.0195    | 0.4509      |
| 20  | A    | 771.7810   | 0.4481      | 10.2729   | 6.7791      |
| 21  | A    | 807.3894   | 0.5668      | 28.1525   | 5.0815      |
| 22  | A    | 818.3063   | 1.1561      | 15.6638   | 19.5799     |
| 23  | A    | 825.6844   | 0.5516      | 3.7172    | 5.0920      |
| 24  | A    | 881.3842   | 0.5710      | 0.0104    | 0.0493      |
| 25  | A    | 888.6952   | 0.9531      | 3.6318    | 7.0671      |
| 26  | A    | 972.2182   | 0.7210      | 0.1070    | 0.4646      |
| 27  | A    | 995.6454   | 0.8496      | 0.0002    | 0.0151      |
| 28  | A    | 1005.7737  | 0.8586      | 0.0027    | 0.0615      |
| 29  | A    | 1019.6658  | 4.5136      | 15.8224   | 28.4259     |
| 30  | A    | 1026.2558  | 0.8123      | 1.4387    | 3.1692      |
| 31  | A    | 1048.3926  | 0.8444      | 0.2338    | 2.1741      |
| 32  | A    | 1060.0634  | 1.0404      | 7.0799    | 1.0227      |
| 33  | A    | 1088.0401  | 1.4947      | 2.5345    | 6.3615      |
| 34  | A    | 1096.5031  | 1.3722      | 8.9175    | 12.6501     |
| 35  | A    | 1118.1887  | 1.0506      | 0.0535    | 0.0695      |
| 36  | A    | 1219.2317  | 1.2426      | 6.7403    | 15.6649     |
| 37  | A    | 1227.8078  | 1.2066      | 60.4543   | 21.6970     |
| 38  | A    | 1240.5816  | 1.8383      | 7.2018    | 38.7562     |
| 39  | A    | 1246.8748  | 1.4991      | 9.8006    | 6.7743      |
| 40  | A    | 1285.4857  | 8.8247      | 0.0062    | 0.9423      |
| 41  | A    | 1308.6824  | 1.1540      | 38.3086   | 7.0375      |
| 42  | A    | 1359.7243  | 1.4491      | 0.2443    | 1.8407      |
| 43  | A    | 1375.2982  | 1.5709      | 7.8843    | 1.3298      |

|    |   |           |        |         |          |
|----|---|-----------|--------|---------|----------|
| 44 | A | 1414.7351 | 1.4730 | 2.3824  | 19.2727  |
| 45 | A | 1415.6163 | 1.4812 | 11.2633 | 1.3360   |
| 46 | A | 1444.2186 | 2.3290 | 10.4747 | 1.7327   |
| 47 | A | 1472.9225 | 1.4024 | 2.8417  | 15.7933  |
| 48 | A | 1480.9122 | 1.3866 | 3.7060  | 15.2690  |
| 49 | A | 1488.8682 | 1.4681 | 21.5187 | 5.7595   |
| 50 | A | 1491.2954 | 1.3798 | 7.9540  | 10.3759  |
| 51 | A | 1499.6151 | 1.3845 | 8.1677  | 6.3093   |
| 52 | A | 1507.7464 | 1.4156 | 5.7347  | 3.3128   |
| 53 | A | 1528.7451 | 3.0547 | 0.9222  | 5.4847   |
| 54 | A | 1605.3062 | 9.0436 | 10.1690 | 6.3539   |
| 55 | A | 1641.4753 | 8.6529 | 81.1354 | 22.7314  |
| 56 | A | 2992.4365 | 5.6411 | 38.1346 | 323.6784 |
| 57 | A | 3023.3970 | 5.5885 | 25.4042 | 188.6847 |
| 58 | A | 3026.6070 | 5.6108 | 18.9247 | 268.9457 |
| 59 | A | 3048.2379 | 5.9643 | 8.4503  | 87.4938  |
| 60 | A | 3082.8301 | 6.1316 | 16.6929 | 85.1786  |
| 61 | A | 3082.9604 | 6.0193 | 8.1273  | 146.8788 |
| 62 | A | 3086.9924 | 6.0833 | 49.0456 | 88.3048  |
| 63 | A | 3099.2284 | 6.2332 | 30.7033 | 30.0735  |
| 64 | A | 3109.1492 | 6.2812 | 13.6540 | 66.2789  |
| 65 | A | 3145.6907 | 6.4684 | 7.1024  | 72.3088  |
| 66 | A | 3148.1413 | 6.3467 | 11.7980 | 77.8712  |
| 67 | A | 3149.9174 | 6.3714 | 2.8664  | 18.0311  |
| 68 | A | 3172.2036 | 6.4811 | 30.1637 | 38.2626  |
| 69 | A | 3174.6043 | 6.5056 | 5.6075  | 273.2986 |

-----  
pyCH3-nC3H7I\_s

| NM# | Symm | Wavenumber | Force Const | IR Intens | Raman Activ |
|-----|------|------------|-------------|-----------|-------------|
| 1   | A    | 3.8150     | 0.0000      | 0.0904    | 3.4629      |
| 2   | A    | 12.9753    | 0.0003      | 0.9841    | 0.4059      |
| 3   | A    | 15.7171    | 0.0006      | 1.4318    | 0.5943      |
| 4   | A    | 24.4610    | 0.0004      | 0.1916    | 1.1564      |
| 5   | A    | 52.8511    | 0.0097      | 0.3938    | 2.1925      |
| 6   | A    | 59.2894    | 0.0175      | 3.1172    | 4.1263      |
| 7   | A    | 63.4874    | 0.0068      | 0.0128    | 0.3247      |
| 8   | A    | 121.2416   | 0.0251      | 0.5313    | 0.6267      |
| 9   | A    | 199.8359   | 0.0847      | 0.3068    | 4.3127      |
| 10  | A    | 216.4449   | 0.1061      | 0.0743    | 2.9710      |
| 11  | A    | 238.9374   | 0.0364      | 0.0360    | 0.0307      |
| 12  | A    | 279.1269   | 0.1683      | 0.6950    | 42.5655     |
| 13  | A    | 344.0911   | 0.1780      | 0.0090    | 0.1672      |
| 14  | A    | 387.6686   | 0.2307      | 0.0046    | 0.1279      |
| 15  | A    | 494.2682   | 0.4237      | 17.5885   | 1.4383      |
| 16  | A    | 529.4234   | 0.9080      | 10.7164   | 11.4842     |
| 17  | A    | 598.1693   | 0.7713      | 3.5346    | 129.7010    |
| 18  | A    | 685.9479   | 1.9176      | 0.0046    | 4.9462      |
| 19  | A    | 732.1290   | 0.3461      | 3.6828    | 0.1015      |
| 20  | A    | 739.7961   | 1.1103      | 3.2621    | 0.6082      |
| 21  | A    | 807.4050   | 0.5662      | 28.4686   | 5.4105      |
| 22  | A    | 818.3721   | 1.1612      | 15.4739   | 19.6864     |
| 23  | A    | 834.9239   | 0.4872      | 0.0064    | 0.7467      |
| 24  | A    | 881.2843   | 0.5709      | 0.0106    | 0.0457      |
| 25  | A    | 900.3415   | 0.9294      | 5.9332    | 0.4209      |
| 26  | A    | 972.1974   | 0.7212      | 0.1020    | 0.4576      |
| 27  | A    | 995.4058   | 0.8492      | 0.0002    | 0.0305      |
| 28  | A    | 1005.7950  | 0.8583      | 0.0002    | 0.0547      |
| 29  | A    | 1019.8096  | 4.5217      | 16.1587   | 27.4446     |
| 30  | A    | 1026.7140  | 0.6871      | 1.5829    | 1.0399      |
| 31  | A    | 1030.9209  | 1.7743      | 0.2765    | 34.3398     |
| 32  | A    | 1060.0119  | 1.0401      | 7.0935    | 1.0365      |
| 33  | A    | 1096.5102  | 1.3723      | 9.5992    | 12.7971     |
| 34  | A    | 1105.2908  | 1.4327      | 2.7800    | 7.8116      |
| 35  | A    | 1118.2803  | 1.0506      | 0.0473    | 0.0681      |
| 36  | A    | 1213.9915  | 1.0897      | 86.3001   | 44.2401     |
| 37  | A    | 1237.6340  | 1.3104      | 0.3161    | 0.4932      |
| 38  | A    | 1240.5360  | 1.8278      | 9.0193    | 38.4141     |
| 39  | A    | 1246.8956  | 1.5045      | 10.1710   | 7.5832      |

|    |   |           |        |         |          |
|----|---|-----------|--------|---------|----------|
| 40 | A | 1285.5523 | 8.8257 | 0.0034  | 0.8786   |
| 41 | A | 1322.9069 | 1.1390 | 0.2650  | 7.5297   |
| 42 | A | 1358.6143 | 1.5131 | 1.1251  | 26.1444  |
| 43 | A | 1359.7508 | 1.4492 | 0.2353  | 1.8226   |
| 44 | A | 1410.0807 | 1.4343 | 2.3990  | 0.9687   |
| 45 | A | 1414.7570 | 1.4729 | 2.2973  | 19.9926  |
| 46 | A | 1444.2815 | 2.3291 | 10.4942 | 1.6989   |
| 47 | A | 1479.4857 | 1.4234 | 1.6649  | 11.6483  |
| 48 | A | 1488.8748 | 1.4684 | 21.6114 | 5.8186   |
| 49 | A | 1491.3012 | 1.3798 | 7.9516  | 10.4931  |
| 50 | A | 1493.8633 | 1.3817 | 1.9286  | 13.3882  |
| 51 | A | 1498.6119 | 1.3750 | 8.7824  | 10.7236  |
| 52 | A | 1508.9130 | 1.4543 | 7.2476  | 1.0815   |
| 53 | A | 1528.8200 | 3.0551 | 0.8547  | 5.7514   |
| 54 | A | 1605.3387 | 9.0437 | 10.2653 | 6.4342   |
| 55 | A | 1641.5748 | 8.6537 | 81.9630 | 22.9397  |
| 56 | A | 3018.7429 | 5.5563 | 40.1372 | 216.9776 |
| 57 | A | 3026.6240 | 5.6109 | 18.8158 | 269.5269 |
| 58 | A | 3034.2231 | 5.7473 | 8.1421  | 88.2892  |
| 59 | A | 3059.9791 | 6.0841 | 0.0087  | 106.6999 |
| 60 | A | 3079.9676 | 5.9269 | 16.0400 | 136.8167 |
| 61 | A | 3082.8575 | 6.1330 | 15.1635 | 87.1635  |
| 62 | A | 3085.7864 | 6.1913 | 41.9612 | 13.6508  |
| 63 | A | 3086.4859 | 6.1528 | 42.0558 | 140.1458 |
| 64 | A | 3109.1796 | 6.2814 | 13.6547 | 66.5247  |
| 65 | A | 3141.1794 | 6.4547 | 10.2523 | 50.5911  |
| 66 | A | 3148.3368 | 6.3475 | 11.8269 | 78.3896  |
| 67 | A | 3150.1063 | 6.3721 | 2.6921  | 17.8705  |
| 68 | A | 3172.2963 | 6.4815 | 30.1796 | 38.9452  |
| 69 | A | 3174.7023 | 6.5061 | 5.8246  | 274.6988 |

-----  
pyNR2-iC3F7I\_dimlam

| NM# | Symm | Wavenumber | Force Const | IR Intens | Raman Activ |
|-----|------|------------|-------------|-----------|-------------|
| 1   | A    | 1.4600     | 0.0000      | 0.5534    | 0.2851      |
| 2   | A    | 20.0527    | 0.0025      | 0.5746    | 2.9984      |
| 3   | A    | 22.8776    | 0.0015      | 0.0234    | 3.0966      |
| 4   | A    | 38.7161    | 0.0051      | 0.2259    | 2.5132      |
| 5   | A    | 40.7204    | 0.0115      | 0.0182    | 0.6181      |
| 6   | A    | 45.4600    | 0.0136      | 0.1174    | 2.6191      |
| 7   | A    | 76.7891    | 0.0641      | 0.1266    | 0.1068      |
| 8   | A    | 88.4679    | 0.0265      | 3.8768    | 7.3597      |
| 9   | A    | 115.5290   | 0.0320      | 0.0977    | 0.5610      |
| 10  | A    | 142.5231   | 0.2336      | 5.9984    | 3.8436      |
| 11  | A    | 142.7839   | 0.0890      | 0.0254    | 0.0136      |
| 12  | A    | 159.1550   | 0.0458      | 3.7534    | 2.0759      |
| 13  | A    | 179.1926   | 0.3540      | 3.0868    | 3.9146      |
| 14  | A    | 191.1674   | 0.0292      | 0.2353    | 0.1166      |
| 15  | A    | 212.3046   | 0.0343      | 9.5537    | 8.5559      |
| 16  | A    | 237.8749   | 0.5380      | 13.5286   | 65.2678     |
| 17  | A    | 254.7828   | 0.7100      | 0.6396    | 0.1088      |
| 18  | A    | 280.5145   | 0.8659      | 1.2112    | 4.3917      |
| 19  | A    | 297.2283   | 0.0957      | 0.0091    | 0.0018      |
| 20  | A    | 298.8552   | 0.9113      | 0.4386    | 0.7586      |
| 21  | A    | 322.1091   | 0.3364      | 51.6052   | 7.1100      |
| 22  | A    | 326.1691   | 0.5036      | 31.2379   | 2.5835      |
| 23  | A    | 343.1195   | 1.2897      | 0.1098    | 1.2254      |
| 24  | A    | 391.4232   | 0.2414      | 0.0059    | 0.1253      |
| 25  | A    | 415.1658   | 0.2656      | 9.7470    | 1.9689      |
| 26  | A    | 462.5590   | 2.2554      | 2.3408    | 3.9558      |
| 27  | A    | 474.0895   | 0.4756      | 1.2267    | 2.5232      |
| 28  | A    | 529.8799   | 2.9703      | 3.3889    | 0.4282      |
| 29  | A    | 532.7107   | 2.3861      | 8.2593    | 17.5761     |
| 30  | A    | 536.3067   | 0.5678      | 7.5573    | 1.6959      |
| 31  | A    | 556.7045   | 3.2947      | 0.2628    | 0.0452      |
| 32  | A    | 565.2968   | 0.5476      | 4.3382    | 0.0690      |
| 33  | A    | 606.7400   | 3.8772      | 3.5032    | 1.8837      |
| 34  | A    | 684.0670   | 1.9056      | 0.4018    | 4.3259      |
| 35  | A    | 701.9039   | 4.7681      | 40.1371   | 0.0189      |

|    |   |           |         |          |          |
|----|---|-----------|---------|----------|----------|
| 36 | A | 740.8116  | 5.4676  | 35.5494  | 30.4559  |
| 37 | A | 743.2102  | 1.0330  | 2.7033   | 1.9399   |
| 38 | A | 760.4984  | 1.7502  | 47.5397  | 18.9244  |
| 39 | A | 819.3772  | 0.6951  | 70.2197  | 2.5762   |
| 40 | A | 835.3166  | 0.5168  | 0.2684   | 0.3316   |
| 41 | A | 883.9062  | 6.1204  | 101.5007 | 113.9508 |
| 42 | A | 948.8890  | 7.5643  | 105.2687 | 0.1376   |
| 43 | A | 957.5210  | 1.3571  | 38.5745  | 2.4574   |
| 44 | A | 963.7222  | 0.7827  | 6.2267   | 1.0272   |
| 45 | A | 992.8812  | 0.8340  | 0.0275   | 0.1387   |
| 46 | A | 1011.3748 | 4.5004  | 21.8168  | 39.5691  |
| 47 | A | 1067.1539 | 1.0652  | 13.5332  | 0.8330   |
| 48 | A | 1098.4099 | 1.4337  | 0.2824   | 5.3261   |
| 49 | A | 1100.1356 | 8.7139  | 88.8590  | 22.0022  |
| 50 | A | 1118.1854 | 0.9213  | 0.8700   | 2.6069   |
| 51 | A | 1130.9891 | 3.4691  | 17.1125  | 1.4000   |
| 52 | A | 1131.4666 | 1.6777  | 21.4392  | 0.7432   |
| 53 | A | 1157.6179 | 10.3252 | 7.4689   | 0.3671   |
| 54 | A | 1165.3751 | 1.1962  | 57.6772  | 22.9548  |
| 55 | A | 1194.0222 | 1.5713  | 11.1787  | 8.5417   |
| 56 | A | 1196.3312 | 9.1398  | 365.9560 | 22.3062  |
| 57 | A | 1209.8011 | 10.5172 | 258.2798 | 12.7405  |
| 58 | A | 1229.1821 | 2.5122  | 15.6201  | 1.6443   |
| 59 | A | 1257.5570 | 3.8350  | 463.3706 | 76.2004  |
| 60 | A | 1258.6028 | 1.4705  | 85.7678  | 38.5138  |
| 61 | A | 1262.8274 | 11.5779 | 252.6369 | 0.5514   |
| 62 | A | 1299.2431 | 7.8038  | 0.3995   | 10.1216  |
| 63 | A | 1355.1298 | 3.3424  | 64.8227  | 41.5850  |
| 64 | A | 1372.5800 | 1.4951  | 2.1684   | 2.4073   |
| 65 | A | 1445.0758 | 1.6614  | 0.7272   | 4.7123   |
| 66 | A | 1455.9060 | 2.1085  | 8.9414   | 3.6282   |
| 67 | A | 1480.2389 | 1.5267  | 3.9461   | 34.8036  |
| 68 | A | 1493.6520 | 1.3839  | 4.4404   | 0.6717   |
| 69 | A | 1503.2214 | 1.4810  | 24.8392  | 13.4826  |
| 70 | A | 1506.7832 | 1.4134  | 1.9723   | 5.1321   |
| 71 | A | 1528.0260 | 1.4897  | 31.5673  | 4.3738   |
| 72 | A | 1536.8736 | 2.6710  | 85.5142  | 5.2399   |
| 73 | A | 1596.5054 | 10.3629 | 36.7978  | 1.9310   |
| 74 | A | 1632.7587 | 8.1303  | 251.4213 | 56.5855  |
| 75 | A | 2996.9196 | 5.5611  | 32.4067  | 63.7907  |
| 76 | A | 3001.5994 | 5.5912  | 95.0321  | 332.8539 |
| 77 | A | 3100.4242 | 6.1322  | 3.1852   | 27.7863  |
| 78 | A | 3102.3027 | 6.1391  | 19.5567  | 85.8246  |
| 79 | A | 3131.6489 | 6.3805  | 4.9287   | 7.8207   |
| 80 | A | 3137.9141 | 6.3980  | 17.7818  | 69.7777  |
| 81 | A | 3147.5469 | 6.3524  | 29.6689  | 115.0935 |
| 82 | A | 3150.5661 | 6.3861  | 9.0179   | 147.8229 |
| 83 | A | 3219.8268 | 6.6689  | 2.0776   | 132.2229 |
| 84 | A | 3219.9454 | 6.6622  | 8.0058   | 8.9047   |

-----

pyNR2-iC3F7I\_dim2am

| NM# | Symm | Wavenumber | Force Const | IR Intens | Raman Activ |
|-----|------|------------|-------------|-----------|-------------|
| 1   | A    | -1.2716    | 0.0000      | 0.7127    | 0.2582      |
| 2   | A    | 18.8435    | 0.0022      | 0.4660    | 2.8508      |
| 3   | A    | 22.4578    | 0.0015      | 0.0234    | 3.0144      |
| 4   | A    | 39.1012    | 0.0051      | 0.2226    | 2.6547      |
| 5   | A    | 40.9296    | 0.0120      | 0.0152    | 0.5673      |
| 6   | A    | 47.8114    | 0.0160      | 0.1705    | 2.5556      |
| 7   | A    | 76.9997    | 0.0671      | 0.0228    | 0.0324      |
| 8   | A    | 86.9431    | 0.0243      | 3.3730    | 5.9765      |
| 9   | A    | 115.0868   | 0.0313      | 0.0977    | 0.5594      |
| 10  | A    | 142.2758   | 0.2702      | 8.4249    | 5.8106      |
| 11  | A    | 142.4143   | 0.0911      | 0.0377    | 0.0273      |
| 12  | A    | 159.1368   | 0.0457      | 2.7239    | 1.8303      |
| 13  | A    | 178.3823   | 0.3042      | 3.4795    | 4.7385      |
| 14  | A    | 191.1555   | 0.0292      | 0.2371    | 0.1195      |
| 15  | A    | 212.1373   | 0.0345      | 8.4454    | 7.5865      |
| 16  | A    | 239.1127   | 0.5363      | 11.0205   | 61.3349     |



|    |   |           |         |          |          |
|----|---|-----------|---------|----------|----------|
| 17 | A | 255.0414  | 0.7114  | 0.6429   | 0.1119   |
| 18 | A | 280.4209  | 0.8655  | 0.3360   | 5.1473   |
| 19 | A | 297.3269  | 0.0955  | 0.0106   | 0.0049   |
| 20 | A | 298.8218  | 0.9238  | 0.4425   | 0.7465   |
| 21 | A | 321.4942  | 0.3449  | 52.0968  | 7.3938   |
| 22 | A | 326.5988  | 0.4872  | 30.5142  | 2.3886   |
| 23 | A | 343.2846  | 1.2909  | 0.1483   | 1.3072   |
| 24 | A | 391.7329  | 0.2416  | 0.0071   | 0.1208   |
| 25 | A | 415.0447  | 0.2655  | 9.5293   | 2.0220   |
| 26 | A | 462.6312  | 2.2687  | 1.7378   | 2.5523   |
| 27 | A | 474.1177  | 0.4756  | 1.2416   | 2.5095   |
| 28 | A | 530.0113  | 2.9721  | 3.2411   | 0.4541   |
| 29 | A | 532.7859  | 2.8947  | 4.2662   | 20.7832  |
| 30 | A | 536.1542  | 0.5440  | 10.9344  | 1.5919   |
| 31 | A | 556.7088  | 3.2937  | 0.2713   | 0.0422   |
| 32 | A | 565.2721  | 0.5478  | 3.8636   | 0.1194   |
| 33 | A | 606.8687  | 3.8952  | 3.4202   | 1.9118   |
| 34 | A | 684.0716  | 1.9056  | 0.3963   | 4.2763   |
| 35 | A | 702.0456  | 4.7683  | 39.8112  | 0.0676   |
| 36 | A | 740.9017  | 5.4841  | 31.4891  | 30.9966  |
| 37 | A | 743.4182  | 1.0311  | 3.3056   | 1.5189   |
| 38 | A | 760.4570  | 1.7490  | 47.7416  | 19.3337  |
| 39 | A | 819.5554  | 0.6960  | 70.8258  | 2.7280   |
| 40 | A | 835.3663  | 0.5167  | 0.2797   | 0.3275   |
| 41 | A | 883.8699  | 6.1156  | 97.8396  | 118.4362 |
| 42 | A | 948.7488  | 7.5646  | 106.4790 | 0.1491   |
| 43 | A | 957.5719  | 1.3774  | 38.7821  | 2.5560   |
| 44 | A | 963.9450  | 0.7767  | 5.5676   | 0.9588   |
| 45 | A | 993.4376  | 0.8353  | 0.0291   | 0.1378   |
| 46 | A | 1011.3850 | 4.5001  | 21.5056  | 38.5981  |
| 47 | A | 1067.2242 | 1.0645  | 13.4455  | 0.8723   |
| 48 | A | 1097.7877 | 6.6253  | 95.1093  | 15.2118  |
| 49 | A | 1098.5415 | 1.5107  | 13.0105  | 6.7431   |
| 50 | A | 1118.2031 | 0.9217  | 0.8025   | 2.5647   |
| 51 | A | 1129.3601 | 8.9688  | 33.1880  | 1.9259   |
| 52 | A | 1131.4212 | 1.2931  | 6.0484   | 0.0783   |
| 53 | A | 1161.4663 | 10.3979 | 9.7290   | 0.4433   |
| 54 | A | 1165.1938 | 1.1987  | 48.9951  | 21.9610  |
| 55 | A | 1193.8860 | 1.6715  | 4.0501   | 6.4856   |
| 56 | A | 1196.6281 | 6.5567  | 321.2390 | 18.2543  |
| 57 | A | 1209.9198 | 11.0124 | 356.0608 | 18.3440  |
| 58 | A | 1229.2689 | 2.5153  | 15.6712  | 1.6039   |
| 59 | A | 1257.4931 | 3.2634  | 318.3655 | 77.6350  |
| 60 | A | 1258.7692 | 1.5735  | 162.4028 | 48.1035  |
| 61 | A | 1262.1497 | 11.5641 | 249.9165 | 0.6526   |
| 62 | A | 1299.3048 | 7.8041  | 0.3856   | 9.9225   |
| 63 | A | 1355.3466 | 3.3450  | 66.4654  | 40.9247  |
| 64 | A | 1372.6170 | 1.4952  | 2.1728   | 2.3463   |
| 65 | A | 1445.0621 | 1.6605  | 0.7189   | 4.7284   |
| 66 | A | 1455.9091 | 2.1094  | 8.9188   | 3.6360   |
| 67 | A | 1480.1915 | 1.5265  | 3.7394   | 33.7427  |
| 68 | A | 1493.5220 | 1.3837  | 4.4768   | 0.6774   |
| 69 | A | 1503.1134 | 1.4804  | 24.0005  | 13.9367  |
| 70 | A | 1506.7971 | 1.4135  | 2.0418   | 5.0817   |
| 71 | A | 1527.9845 | 1.4888  | 31.5625  | 4.3919   |
| 72 | A | 1536.8931 | 2.6771  | 84.6781  | 4.8263   |
| 73 | A | 1596.5382 | 10.3675 | 36.7124  | 1.9504   |
| 74 | A | 1632.7778 | 8.1307  | 247.7149 | 56.2974  |
| 75 | A | 2996.8966 | 5.5609  | 32.5156  | 64.7811  |
| 76 | A | 3001.5885 | 5.5912  | 96.3174  | 335.9419 |
| 77 | A | 3100.3464 | 6.1320  | 3.1821   | 27.8947  |
| 78 | A | 3102.2211 | 6.1389  | 19.3554  | 88.2655  |
| 79 | A | 3131.5288 | 6.3800  | 4.9123   | 7.8786   |
| 80 | A | 3137.8026 | 6.3975  | 17.9020  | 71.5528  |
| 81 | A | 3147.5809 | 6.3525  | 29.5922  | 113.3481 |
| 82 | A | 3150.6007 | 6.3862  | 8.8130   | 146.2500 |
| 83 | A | 3219.7846 | 6.6686  | 2.1162   | 130.4227 |
| 84 | A | 3219.9068 | 6.6621  | 7.9319   | 10.2485  |

-----  
pyNR2-iC3F7I\_trml

| NM# | Symm | Wavenumber | Force Const | IR Intens | Raman Activ |
|-----|------|------------|-------------|-----------|-------------|
| 1   | A    | 0.9871     | 0.0000      | 0.0267    | 0.0872      |
| 2   | A    | 1.5633     | 0.0000      | 0.1083    | 0.0790      |
| 3   | A    | 6.2807     | 0.0004      | 0.1708    | 1.2461      |
| 4   | A    | 14.4992    | 0.0015      | 0.0472    | 0.0034      |
| 5   | A    | 18.3827    | 0.0034      | 0.0235    | 0.2911      |
| 6   | A    | 23.1430    | 0.0018      | 0.1056    | 1.6324      |
| 7   | A    | 31.3520    | 0.0193      | 0.4656    | 0.2324      |
| 8   | A    | 40.2210    | 0.0166      | 0.0245    | 0.1052      |
| 9   | A    | 40.6035    | 0.0183      | 0.0088    | 0.0001      |
| 10  | A    | 45.4394    | 0.0055      | 0.1808    | 3.5954      |
| 11  | A    | 61.2077    | 0.0232      | 0.4336    | 0.3774      |
| 12  | A    | 72.2012    | 0.0278      | 5.4132    | 2.6716      |
| 13  | A    | 76.2626    | 0.0248      | 0.0074    | 0.0420      |
| 14  | A    | 76.7816    | 0.0400      | 2.6256    | 0.7423      |
| 15  | A    | 78.6778    | 0.0453      | 1.5748    | 2.5621      |
| 16  | A    | 89.7773    | 0.0293      | 0.4177    | 9.3330      |
| 17  | A    | 114.6489   | 0.0281      | 0.0407    | 0.3257      |
| 18  | A    | 138.6979   | 0.1074      | 0.0793    | 0.0689      |
| 19  | A    | 141.0238   | 0.2584      | 13.5932   | 7.9582      |
| 20  | A    | 141.4274   | 0.1705      | 0.1435    | 0.3323      |
| 21  | A    | 142.7064   | 0.2555      | 5.0729    | 4.4744      |
| 22  | A    | 168.3162   | 0.0604      | 8.3889    | 5.5902      |
| 23  | A    | 178.5225   | 0.3533      | 2.5036    | 2.5247      |
| 24  | A    | 182.8054   | 0.1342      | 2.6605    | 6.7442      |
| 25  | A    | 186.0159   | 0.0269      | 0.1796    | 0.1534      |
| 26  | A    | 203.2407   | 0.0337      | 12.7815   | 11.9438     |
| 27  | A    | 233.7322   | 0.6960      | 25.9035   | 76.0961     |
| 28  | A    | 241.3087   | 0.6310      | 6.9262    | 65.1569     |
| 29  | A    | 254.7256   | 0.6998      | 0.7823    | 0.1624      |
| 30  | A    | 254.8053   | 0.7085      | 0.4091    | 0.0934      |
| 31  | A    | 279.0883   | 0.8361      | 1.8987    | 5.9835      |
| 32  | A    | 281.4578   | 0.8748      | 1.4511    | 3.9662      |
| 33  | A    | 297.9642   | 0.1317      | 0.2113    | 0.1156      |
| 34  | A    | 298.5704   | 0.8908      | 0.3259    | 0.7951      |
| 35  | A    | 300.2244   | 0.3279      | 0.3659    | 0.7374      |
| 36  | A    | 314.2770   | 0.2471      | 86.9385   | 14.2077     |
| 37  | A    | 324.7055   | 1.0653      | 2.7816    | 1.3169      |
| 38  | A    | 325.5563   | 1.1061      | 0.8362    | 3.6053      |
| 39  | A    | 343.1020   | 1.2897      | 0.0946    | 1.1416      |
| 40  | A    | 343.1900   | 1.2891      | 0.1625    | 1.3803      |
| 41  | A    | 400.8849   | 0.2596      | 0.0065    | 0.0732      |
| 42  | A    | 419.2606   | 0.2711      | 6.2540    | 5.6498      |
| 43  | A    | 462.6144   | 2.2608      | 2.3199    | 4.1360      |
| 44  | A    | 462.8285   | 2.2699      | 1.8299    | 3.1895      |
| 45  | A    | 477.7173   | 0.4846      | 1.7658    | 1.9399      |
| 46  | A    | 529.7580   | 2.9707      | 3.1667    | 0.4985      |
| 47  | A    | 529.9964   | 2.9709      | 3.5034    | 0.4061      |
| 48  | A    | 531.9713   | 2.6257      | 2.8254    | 23.0148     |
| 49  | A    | 533.3824   | 2.8542      | 7.4198    | 15.5277     |
| 50  | A    | 539.3067   | 0.5409      | 17.6248   | 0.8233      |
| 51  | A    | 556.4354   | 3.2939      | 0.2287    | 0.0342      |
| 52  | A    | 556.8475   | 3.2951      | 0.2616    | 0.0587      |
| 53  | A    | 564.2072   | 0.5804      | 0.8687    | 0.5552      |
| 54  | A    | 606.1558   | 3.8838      | 4.5446    | 1.8379      |
| 55  | A    | 607.0393   | 3.8802      | 3.3032    | 1.8278      |
| 56  | A    | 681.5288   | 1.8912      | 0.0814    | 3.6958      |
| 57  | A    | 700.8001   | 4.7581      | 36.8039   | 0.0331      |
| 58  | A    | 702.5304   | 4.7733      | 41.9177   | 0.0140      |
| 59  | A    | 739.8057   | 5.3328      | 36.9393   | 33.0212     |
| 60  | A    | 741.3305   | 5.4592      | 35.5478   | 34.4620     |
| 61  | A    | 743.6107   | 1.0744      | 1.5319    | 1.5746      |
| 62  | A    | 766.5348   | 1.7925      | 50.7246   | 36.2364     |
| 63  | A    | 822.7843   | 0.6987      | 72.4255   | 2.9965      |
| 64  | A    | 836.0787   | 0.5162      | 0.2691    | 0.2072      |
| 65  | A    | 884.2184   | 6.1407      | 121.6788  | 105.0995    |
| 66  | A    | 885.1180   | 6.1313      | 94.2428   | 124.7307    |
| 67  | A    | 947.5921   | 7.5374      | 97.5407   | 0.2156      |
| 68  | A    | 949.5545   | 7.5759      | 112.6024  | 0.1402      |

|     |   |           |         |          |          |
|-----|---|-----------|---------|----------|----------|
| 69  | A | 959.2261  | 1.5186  | 36.3564  | 11.1146  |
| 70  | A | 967.8498  | 0.7465  | 1.9145   | 1.7780   |
| 71  | A | 992.1014  | 0.8233  | 0.0418   | 0.1642   |
| 72  | A | 1021.5776 | 4.2985  | 71.4456  | 25.9085  |
| 73  | A | 1069.8021 | 1.0694  | 14.7970  | 0.5814   |
| 74  | A | 1089.6718 | 8.1971  | 90.7670  | 17.6210  |
| 75  | A | 1098.5936 | 1.5141  | 25.3752  | 36.0216  |
| 76  | A | 1104.2492 | 9.5051  | 89.1862  | 20.2688  |
| 77  | A | 1119.7116 | 0.9196  | 1.3799   | 2.6174   |
| 78  | A | 1122.4409 | 9.6237  | 35.4396  | 2.4087   |
| 79  | A | 1135.3587 | 9.9073  | 35.3306  | 1.9911   |
| 80  | A | 1139.5776 | 1.2869  | 1.2685   | 0.0080   |
| 81  | A | 1153.3667 | 10.2461 | 11.0491  | 0.3906   |
| 82  | A | 1159.9770 | 10.3655 | 5.4085   | 0.4022   |
| 83  | A | 1161.2570 | 1.1607  | 102.5785 | 48.0944  |
| 84  | A | 1189.7670 | 10.7994 | 412.9678 | 37.2589  |
| 85  | A | 1197.0944 | 1.5739  | 26.6730  | 18.8418  |
| 86  | A | 1199.8050 | 8.9335  | 297.9738 | 17.9267  |
| 87  | A | 1205.9093 | 10.3229 | 266.7303 | 7.4561   |
| 88  | A | 1211.3307 | 10.5549 | 295.3761 | 11.5045  |
| 89  | A | 1234.6523 | 2.4130  | 14.7670  | 0.5387   |
| 90  | A | 1251.0918 | 2.1213  | 666.6750 | 102.8077 |
| 91  | A | 1259.4418 | 6.5431  | 463.1520 | 83.7182  |
| 92  | A | 1260.6305 | 11.5446 | 235.9849 | 0.4379   |
| 93  | A | 1261.4383 | 2.4266  | 62.3806  | 37.1302  |
| 94  | A | 1267.1871 | 11.6242 | 269.6222 | 0.9085   |
| 95  | A | 1312.0249 | 8.0886  | 0.7203   | 4.7377   |
| 96  | A | 1368.9820 | 3.3617  | 116.0336 | 85.1264  |
| 97  | A | 1373.0484 | 1.4973  | 5.1533   | 0.9139   |
| 98  | A | 1448.4451 | 1.4978  | 0.0256   | 5.7811   |
| 99  | A | 1464.1315 | 2.5723  | 12.1698  | 2.6030   |
| 100 | A | 1482.1141 | 1.5352  | 6.7786   | 34.1678  |
| 101 | A | 1494.5766 | 1.3869  | 4.2040   | 1.2410   |
| 102 | A | 1504.2485 | 1.4641  | 24.7760  | 15.7447  |
| 103 | A | 1507.5074 | 1.4297  | 2.0130   | 3.7515   |
| 104 | A | 1528.3160 | 1.5063  | 42.1637  | 10.9673  |
| 105 | A | 1544.2835 | 2.8105  | 112.0971 | 8.8138   |
| 106 | A | 1592.7213 | 10.1886 | 27.0673  | 3.2188   |
| 107 | A | 1643.0926 | 8.1286  | 367.4542 | 101.4672 |
| 108 | A | 3001.3125 | 5.5724  | 31.8938  | 65.2587  |
| 109 | A | 3005.8411 | 5.6028  | 84.9538  | 338.9733 |
| 110 | A | 3100.9129 | 6.1426  | 3.2494   | 33.3138  |
| 111 | A | 3102.1535 | 6.1513  | 19.6473  | 71.9329  |
| 112 | A | 3133.3365 | 6.3860  | 3.2035   | 4.3861   |
| 113 | A | 3140.6201 | 6.4038  | 18.0284  | 104.8128 |
| 114 | A | 3162.5108 | 6.4174  | 10.6435  | 39.0872  |
| 115 | A | 3164.9274 | 6.4477  | 0.5460   | 56.5543  |
| 116 | A | 3226.4822 | 6.6985  | 6.0407   | 132.2637 |
| 117 | A | 3226.6690 | 6.6918  | 3.4569   | 27.3493  |

pyNR2-iC3F7I\_trm2

| NM# | Symm | Wavenumber | Force Const | IR Intens | Raman Activ |
|-----|------|------------|-------------|-----------|-------------|
| 1   | A    | -1.2338    | 0.0000      | 0.1156    | 0.0900      |
| 2   | A    | 1.4479     | 0.0000      | 0.0724    | 0.0637      |
| 3   | A    | 5.9220     | 0.0003      | 0.1502    | 1.1627      |
| 4   | A    | 14.4869    | 0.0015      | 0.0457    | 0.0032      |
| 5   | A    | 17.6858    | 0.0031      | 0.0094    | 0.1908      |
| 6   | A    | 22.8363    | 0.0017      | 0.1079    | 1.6245      |
| 7   | A    | 32.7253    | 0.0222      | 0.3906    | 0.1828      |
| 8   | A    | 40.4268    | 0.0171      | 0.0216    | 0.0852      |
| 9   | A    | 40.6352    | 0.0183      | 0.0084    | 0.0001      |
| 10  | A    | 45.7911    | 0.0055      | 0.1847    | 3.6211      |
| 11  | A    | 61.6695    | 0.0238      | 0.5904    | 0.4351      |
| 12  | A    | 72.1464    | 0.0305      | 4.8577    | 2.3052      |
| 13  | A    | 76.2488    | 0.0248      | 0.0075    | 0.0435      |
| 14  | A    | 77.2155    | 0.0413      | 2.2231    | 0.8528      |
| 15  | A    | 78.5354    | 0.0357      | 2.3149    | 3.2247      |
| 16  | A    | 88.6469    | 0.0295      | 0.2141    | 7.0670      |

|    |   |           |         |          |          |
|----|---|-----------|---------|----------|----------|
| 17 | A | 114.2677  | 0.0275  | 0.0399   | 0.3187   |
| 18 | A | 138.4691  | 0.1084  | 0.0772   | 0.0797   |
| 19 | A | 140.6904  | 0.2617  | 15.6513  | 7.0328   |
| 20 | A | 141.3950  | 0.1752  | 0.1476   | 0.3264   |
| 21 | A | 142.7271  | 0.2690  | 4.0803   | 6.8983   |
| 22 | A | 168.2365  | 0.0614  | 9.2003   | 6.0708   |
| 23 | A | 177.9259  | 0.3063  | 2.3951   | 5.2097   |
| 24 | A | 182.5758  | 0.1201  | 1.7939   | 3.6726   |
| 25 | A | 185.8958  | 0.0269  | 0.1814   | 0.1571   |
| 26 | A | 203.1641  | 0.0345  | 11.3114  | 10.3513  |
| 27 | A | 233.7863  | 0.6968  | 24.0586  | 75.8808  |
| 28 | A | 242.1586  | 0.6404  | 6.1896   | 62.2976  |
| 29 | A | 254.7267  | 0.6985  | 0.6114   | 0.1519   |
| 30 | A | 255.0738  | 0.7113  | 0.5914   | 0.1133   |
| 31 | A | 279.0418  | 0.8319  | 1.7353   | 6.3555   |
| 32 | A | 281.3467  | 0.8713  | 0.6531   | 3.6776   |
| 33 | A | 297.8776  | 0.1282  | 0.1740   | 0.1441   |
| 34 | A | 298.5438  | 0.9321  | 0.3604   | 0.6943   |
| 35 | A | 300.1983  | 0.3465  | 0.3708   | 0.7666   |
| 36 | A | 313.7954  | 0.2512  | 85.2942  | 14.4511  |
| 37 | A | 324.8486  | 1.0170  | 3.2694   | 1.1448   |
| 38 | A | 325.5639  | 1.0935  | 1.0121   | 3.4214   |
| 39 | A | 343.1911  | 1.2891  | 0.1698   | 1.3436   |
| 40 | A | 343.2759  | 1.2909  | 0.1301   | 1.3392   |
| 41 | A | 401.1587  | 0.2598  | 0.0082   | 0.0698   |
| 42 | A | 419.0803  | 0.2712  | 6.4687   | 5.5728   |
| 43 | A | 462.6692  | 2.2695  | 1.6426   | 2.6430   |
| 44 | A | 462.8287  | 2.2700  | 1.7474   | 3.1248   |
| 45 | A | 477.7729  | 0.4848  | 1.7850   | 1.9299   |
| 46 | A | 529.7575  | 2.9707  | 3.1946   | 0.4812   |
| 47 | A | 530.1113  | 2.9726  | 3.3041   | 0.4393   |
| 48 | A | 531.9790  | 2.6511  | 2.3391   | 22.8889  |
| 49 | A | 533.3485  | 2.9539  | 6.4330   | 18.9386  |
| 50 | A | 539.2253  | 0.5356  | 18.1314  | 0.9545   |
| 51 | A | 556.4333  | 3.2939  | 0.2290   | 0.0340   |
| 52 | A | 556.8791  | 3.2945  | 0.2751   | 0.0522   |
| 53 | A | 564.0679  | 0.5806  | 0.6917   | 0.5150   |
| 54 | A | 606.1562  | 3.8827  | 4.4960   | 1.9786   |
| 55 | A | 607.1587  | 3.8978  | 3.3268   | 1.9249   |
| 56 | A | 681.5304  | 1.8912  | 0.0792   | 3.6585   |
| 57 | A | 700.7970  | 4.7580  | 36.4731  | 0.0333   |
| 58 | A | 702.6749  | 4.7734  | 41.7161  | 0.0803   |
| 59 | A | 739.8094  | 5.3498  | 32.6848  | 34.1555  |
| 60 | A | 741.4123  | 5.4914  | 32.6020  | 33.4462  |
| 61 | A | 743.6566  | 1.0728  | 2.1796   | 1.2322   |
| 62 | A | 766.4971  | 1.7918  | 50.6836  | 35.9932  |
| 63 | A | 822.8210  | 0.6986  | 72.8487  | 3.0371   |
| 64 | A | 836.0137  | 0.5161  | 0.2814   | 0.1958   |
| 65 | A | 884.2160  | 6.1420  | 111.1589 | 105.8734 |
| 66 | A | 885.1008  | 6.1275  | 98.7154  | 125.6433 |
| 67 | A | 947.5847  | 7.5374  | 95.2801  | 0.2256   |
| 68 | A | 949.3950  | 7.5760  | 115.8383 | 0.1484   |
| 69 | A | 959.2844  | 1.5208  | 36.1241  | 11.3357  |
| 70 | A | 967.9276  | 0.7462  | 1.8594   | 1.8129   |
| 71 | A | 992.5176  | 0.8243  | 0.0422   | 0.1610   |
| 72 | A | 1021.5851 | 4.2979  | 71.0958  | 25.1120  |
| 73 | A | 1069.8820 | 1.0693  | 14.7336  | 0.6155   |
| 74 | A | 1089.6562 | 8.2128  | 92.2885  | 17.8015  |
| 75 | A | 1098.6143 | 1.5102  | 26.0717  | 34.2291  |
| 76 | A | 1101.9833 | 9.5747  | 119.0841 | 14.8763  |
| 77 | A | 1119.7955 | 0.9198  | 1.3125   | 2.5954   |
| 78 | A | 1122.4247 | 9.6225  | 35.6849  | 2.3787   |
| 79 | A | 1133.6824 | 9.8720  | 36.4577  | 1.6852   |
| 80 | A | 1139.5987 | 1.2863  | 1.1740   | 0.0135   |
| 81 | A | 1153.3608 | 10.2459 | 11.1822  | 0.3901   |
| 82 | A | 1161.1201 | 1.1616  | 90.9752  | 46.5394  |
| 83 | A | 1163.9321 | 10.4412 | 7.7576   | 0.5128   |
| 84 | A | 1189.7504 | 10.8036 | 423.6652 | 37.1384  |
| 85 | A | 1196.8640 | 1.6886  | 18.8684  | 16.0346  |
| 86 | A | 1199.8724 | 6.2332  | 258.3804 | 15.0530  |
| 87 | A | 1205.9088 | 10.4015 | 268.6318 | 7.5289   |

|     |   |           |         |          |          |
|-----|---|-----------|---------|----------|----------|
| 88  | A | 1211.7323 | 11.1055 | 429.5933 | 16.7268  |
| 89  | A | 1234.7834 | 2.4166  | 14.8206  | 0.5321   |
| 90  | A | 1251.1441 | 2.0882  | 498.4249 | 101.0405 |
| 91  | A | 1259.5356 | 9.2002  | 425.6620 | 101.0685 |
| 92  | A | 1259.8080 | 11.5280 | 232.8231 | 0.6273   |
| 93  | A | 1261.3470 | 2.2228  | 134.9696 | 28.5782  |
| 94  | A | 1267.1908 | 11.6243 | 269.3884 | 0.8360   |
| 95  | A | 1312.0870 | 8.0817  | 0.7034   | 4.5957   |
| 96  | A | 1369.0942 | 3.3635  | 117.6576 | 83.3288  |
| 97  | A | 1373.0733 | 1.4974  | 5.1551   | 0.8826   |
| 98  | A | 1448.5078 | 1.4984  | 0.0267   | 5.8531   |
| 99  | A | 1464.1539 | 2.5704  | 12.1219  | 2.5858   |
| 100 | A | 1482.1253 | 1.5353  | 6.4605   | 32.7671  |
| 101 | A | 1494.4827 | 1.3868  | 4.2677   | 1.2707   |
| 102 | A | 1504.1112 | 1.4629  | 23.8882  | 16.2242  |
| 103 | A | 1507.4756 | 1.4300  | 2.0551   | 3.6904   |
| 104 | A | 1528.2149 | 1.5056  | 41.9702  | 10.9785  |
| 105 | A | 1544.2689 | 2.8170  | 110.8709 | 7.9648   |
| 106 | A | 1592.7366 | 10.1899 | 27.0015  | 3.2253   |
| 107 | A | 1643.1184 | 8.1302  | 362.1154 | 100.6899 |
| 108 | A | 3001.2997 | 5.5722  | 32.0272  | 66.3425  |
| 109 | A | 3005.8428 | 5.6027  | 86.1182  | 343.2283 |
| 110 | A | 3100.7697 | 6.1423  | 3.2585   | 33.5214  |
| 111 | A | 3101.9958 | 6.1511  | 19.3985  | 73.9104  |
| 112 | A | 3133.2028 | 6.3853  | 3.1815   | 4.3724   |
| 113 | A | 3140.5142 | 6.4031  | 18.1824  | 107.5754 |
| 114 | A | 3162.5105 | 6.4174  | 10.6041  | 38.3629  |
| 115 | A | 3164.9286 | 6.4477  | 0.5830   | 56.1852  |
| 116 | A | 3226.4478 | 6.6984  | 5.9711   | 131.6400 |
| 117 | A | 3226.6358 | 6.6916  | 3.4520   | 27.3711  |

-----  
pyNR2-iC3F7I\_trm3

| NM# | Symm | Wavenumber | Force Const | IR Intens | Raman Activ |
|-----|------|------------|-------------|-----------|-------------|
| 1   | A    | 0.4742     | 0.0000      | 0.0055    | 0.0566      |
| 2   | A    | 1.4032     | 0.0000      | 0.2486    | 0.1442      |
| 3   | A    | 6.1085     | 0.0003      | 0.1570    | 1.1845      |
| 4   | A    | 14.4582    | 0.0015      | 0.0464    | 0.0045      |
| 5   | A    | 18.6909    | 0.0036      | 0.0294    | 0.3310      |
| 6   | A    | 23.5819    | 0.0019      | 0.1113    | 1.6131      |
| 7   | A    | 32.4416    | 0.0211      | 0.5254    | 0.2865      |
| 8   | A    | 40.2197    | 0.0167      | 0.0299    | 0.0981      |
| 9   | A    | 40.3534    | 0.0181      | 0.0056    | 0.0004      |
| 10  | A    | 45.7761    | 0.0055      | 0.1755    | 3.6292      |
| 11  | A    | 58.8944    | 0.0192      | 0.3298    | 0.4097      |
| 12  | A    | 72.6976    | 0.0311      | 5.3480    | 2.1484      |
| 13  | A    | 76.2819    | 0.0249      | 0.0080    | 0.0421      |
| 14  | A    | 76.7538    | 0.0431      | 2.3019    | 0.5561      |
| 15  | A    | 78.5980    | 0.0387      | 2.3761    | 3.0316      |
| 16  | A    | 91.1547    | 0.0310      | 0.4387    | 10.1448     |
| 17  | A    | 115.0938   | 0.0285      | 0.0404    | 0.3264      |
| 18  | A    | 138.7870   | 0.1057      | 0.0808    | 0.0702      |
| 19  | A    | 140.4887   | 0.2337      | 10.2448   | 5.4228      |
| 20  | A    | 141.4111   | 0.1694      | 0.1495    | 0.3315      |
| 21  | A    | 142.8399   | 0.2705      | 4.3559    | 4.8417      |
| 22  | A    | 168.3502   | 0.0601      | 4.7685    | 2.8119      |
| 23  | A    | 178.6253   | 0.3618      | 1.7430    | 4.3458      |
| 24  | A    | 182.4663   | 0.1498      | 14.4550   | 12.8378     |
| 25  | A    | 186.4267   | 0.0271      | 0.1787    | 0.1513      |
| 26  | A    | 203.5727   | 0.0333      | 16.0349   | 9.3589      |
| 27  | A    | 234.6495   | 0.7047      | 13.7342   | 76.4914     |
| 28  | A    | 241.1326   | 0.6198      | 9.7706    | 60.7890     |
| 29  | A    | 254.7882   | 0.7063      | 1.1683    | 0.1070      |
| 30  | A    | 254.8264   | 0.7025      | 0.0201    | 0.1535      |
| 31  | A    | 279.0595   | 0.8266      | 0.0079    | 7.4700      |
| 32  | A    | 281.4540   | 0.8751      | 1.4694    | 4.0549      |
| 33  | A    | 298.0249   | 0.1350      | 0.2308    | 0.1563      |
| 34  | A    | 298.5736   | 0.8805      | 0.3176    | 0.7468      |
| 35  | A    | 300.2578   | 0.3093      | 0.3523    | 0.7252      |

|     |   |           |         |          |          |
|-----|---|-----------|---------|----------|----------|
| 36  | A | 314.0303  | 0.2495  | 88.5507  | 16.0118  |
| 37  | A | 324.6630  | 1.0883  | 2.0524   | 2.8047   |
| 38  | A | 325.7688  | 1.0362  | 2.7171   | 1.2411   |
| 39  | A | 343.1166  | 1.2898  | 0.1006   | 1.1502   |
| 40  | A | 343.2322  | 1.2894  | 0.1669   | 1.4240   |
| 41  | A | 400.9403  | 0.2598  | 0.0044   | 0.0694   |
| 42  | A | 419.2738  | 0.2712  | 6.3618   | 5.6009   |
| 43  | A | 462.6259  | 2.2617  | 2.5622   | 3.4917   |
| 44  | A | 462.7920  | 2.2661  | 1.6181   | 4.0214   |
| 45  | A | 477.7831  | 0.4848  | 1.7668   | 1.9412   |
| 46  | A | 529.7815  | 2.9710  | 3.0840   | 0.4807   |
| 47  | A | 529.9932  | 2.9709  | 3.5562   | 0.4197   |
| 48  | A | 532.1240  | 2.9523  | 3.7800   | 21.2086  |
| 49  | A | 533.3730  | 2.8029  | 8.0954   | 15.3221  |
| 50  | A | 539.2187  | 0.5307  | 16.3214  | 2.4587   |
| 51  | A | 556.4342  | 3.2936  | 0.2302   | 0.0331   |
| 52  | A | 556.8503  | 3.2952  | 0.2610   | 0.0587   |
| 53  | A | 564.3258  | 0.5809  | 0.8502   | 0.5450   |
| 54  | A | 606.1910  | 3.8809  | 4.3324   | 2.1726   |
| 55  | A | 607.0373  | 3.8821  | 3.2816   | 1.6675   |
| 56  | A | 681.5318  | 1.8912  | 0.0814   | 3.6924   |
| 57  | A | 700.8274  | 4.7579  | 36.3970  | 0.0480   |
| 58  | A | 702.5328  | 4.7733  | 42.2494  | 0.0139   |
| 59  | A | 739.8500  | 5.5011  | 29.7728  | 32.5416  |
| 60  | A | 741.3296  | 5.4260  | 39.5875  | 33.8952  |
| 61  | A | 743.6444  | 1.0697  | 2.8679   | 2.3266   |
| 62  | A | 766.5326  | 1.7926  | 51.4170  | 35.9800  |
| 63  | A | 822.9090  | 0.6990  | 72.3483  | 2.8088   |
| 64  | A | 836.2119  | 0.5164  | 0.2604   | 0.2238   |
| 65  | A | 884.2988  | 6.1340  | 112.4765 | 104.9810 |
| 66  | A | 885.1434  | 6.1376  | 102.4715 | 124.0971 |
| 67  | A | 947.5513  | 7.5376  | 97.4513  | 0.2271   |
| 68  | A | 949.5634  | 7.5760  | 113.0239 | 0.1340   |
| 69  | A | 959.3455  | 1.5169  | 36.3007  | 11.3171  |
| 70  | A | 967.8430  | 0.7470  | 1.7564   | 1.8175   |
| 71  | A | 992.1974  | 0.8233  | 0.0555   | 0.1431   |
| 72  | A | 1021.5910 | 4.2983  | 71.7984  | 25.9632  |
| 73  | A | 1069.8552 | 1.0698  | 14.8016  | 0.5838   |
| 74  | A | 1088.9905 | 8.3433  | 100.2769 | 17.5510  |
| 75  | A | 1098.5667 | 1.5097  | 21.3415  | 35.2151  |
| 76  | A | 1104.2496 | 9.4732  | 89.9798  | 19.7659  |
| 77  | A | 1119.8449 | 0.9198  | 1.4550   | 2.6886   |
| 78  | A | 1122.0023 | 9.6018  | 35.7712  | 2.2190   |
| 79  | A | 1135.3625 | 9.9091  | 35.4575  | 2.0015   |
| 80  | A | 1139.5906 | 1.2865  | 1.2504   | 0.0177   |
| 81  | A | 1154.4031 | 10.2654 | 11.3874  | 0.4139   |
| 82  | A | 1159.9780 | 10.3656 | 5.1632   | 0.4005   |
| 83  | A | 1161.3581 | 1.1605  | 102.7510 | 47.5395  |
| 84  | A | 1189.9291 | 10.8225 | 422.1942 | 36.1409  |
| 85  | A | 1197.1033 | 1.5742  | 30.5874  | 19.4142  |
| 86  | A | 1199.8210 | 8.7863  | 316.6341 | 18.0262  |
| 87  | A | 1205.8062 | 10.5743 | 280.6545 | 9.6099   |
| 88  | A | 1211.3126 | 10.4705 | 264.3499 | 11.2405  |
| 89  | A | 1234.6953 | 2.4137  | 14.7610  | 0.5318   |
| 90  | A | 1251.2097 | 2.0972  | 562.8260 | 101.0784 |
| 91  | A | 1259.4478 | 6.2183  | 435.7612 | 81.9104  |
| 92  | A | 1260.6425 | 11.5447 | 234.3846 | 0.4555   |
| 93  | A | 1261.5498 | 2.5088  | 166.7943 | 38.9217  |
| 94  | A | 1267.0774 | 11.6219 | 270.3675 | 0.9272   |
| 95  | A | 1312.0582 | 8.0845  | 0.7173   | 4.8491   |
| 96  | A | 1368.9456 | 3.3618  | 116.3155 | 84.2282  |
| 97  | A | 1373.0708 | 1.4974  | 5.1530   | 0.9077   |
| 98  | A | 1448.5444 | 1.4989  | 0.0272   | 5.7938   |
| 99  | A | 1464.1478 | 2.5703  | 12.1759  | 2.6208   |
| 100 | A | 1482.2126 | 1.5356  | 6.7367   | 33.9908  |
| 101 | A | 1494.6455 | 1.3870  | 4.2086   | 1.2323   |
| 102 | A | 1504.2797 | 1.4641  | 24.5587  | 15.9676  |
| 103 | A | 1507.6086 | 1.4298  | 2.0035   | 3.7764   |
| 104 | A | 1528.4016 | 1.5062  | 42.2091  | 10.7596  |
| 105 | A | 1544.2881 | 2.8104  | 112.0348 | 8.6254   |
| 106 | A | 1592.7460 | 10.1882 | 27.0649  | 3.2465   |

|     |   |           |        |          |          |
|-----|---|-----------|--------|----------|----------|
| 107 | A | 1643.0966 | 8.1284 | 367.0801 | 101.5284 |
| 108 | A | 3001.3227 | 5.5725 | 31.9022  | 65.6444  |
| 109 | A | 3005.8525 | 5.6028 | 85.2995  | 341.1542 |
| 110 | A | 3100.9121 | 6.1426 | 3.2539   | 33.3157  |
| 111 | A | 3102.1506 | 6.1513 | 19.6051  | 72.0570  |
| 112 | A | 3133.3479 | 6.3860 | 3.2019   | 4.3658   |
| 113 | A | 3140.6305 | 6.4038 | 18.0353  | 104.6712 |
| 114 | A | 3162.5108 | 6.4174 | 10.6332  | 39.1467  |
| 115 | A | 3164.9293 | 6.4477 | 0.5802   | 56.5700  |
| 116 | A | 3226.4900 | 6.6985 | 6.0204   | 132.3683 |
| 117 | A | 3226.6760 | 6.6918 | 3.4592   | 27.4613  |

-----  
pyNR2-iC3F7I\_trm4

| NM# | Symm | Wavenumber | Force Const | IR Intens | Raman Activ |
|-----|------|------------|-------------|-----------|-------------|
| 1   | A    | -0.8539    | 0.0000      | 0.0617    | 0.0599      |
| 2   | A    | 2.0183     | 0.0000      | 0.2277    | 0.1316      |
| 3   | A    | 5.7877     | 0.0003      | 0.1385    | 1.1017      |
| 4   | A    | 14.4336    | 0.0015      | 0.0454    | 0.0025      |
| 5   | A    | 17.8543    | 0.0033      | 0.0103    | 0.2208      |
| 6   | A    | 23.4831    | 0.0019      | 0.1168    | 1.5735      |
| 7   | A    | 33.9900    | 0.0248      | 0.4668    | 0.2522      |
| 8   | A    | 40.3316    | 0.0180      | 0.0161    | 0.0121      |
| 9   | A    | 40.6084    | 0.0171      | 0.0176    | 0.0896      |
| 10  | A    | 46.2469    | 0.0056      | 0.1751    | 3.6642      |
| 11  | A    | 59.2026    | 0.0194      | 0.4207    | 0.4499      |
| 12  | A    | 72.6357    | 0.0343      | 4.7865    | 1.7499      |
| 13  | A    | 76.2108    | 0.0252      | 0.0218    | 0.0501      |
| 14  | A    | 77.0911    | 0.0461      | 1.7789    | 0.4531      |
| 15  | A    | 78.5855    | 0.0302      | 3.0966    | 3.9201      |
| 16  | A    | 90.0295    | 0.0314      | 0.5313    | 7.7981      |
| 17  | A    | 114.6146   | 0.0278      | 0.0396    | 0.3188      |
| 18  | A    | 138.5311   | 0.1070      | 0.0778    | 0.0811      |
| 19  | A    | 140.5678   | 0.2418      | 9.2080    | 5.6597      |
| 20  | A    | 141.3775   | 0.1757      | 0.2843    | 0.3918      |
| 21  | A    | 142.4648   | 0.2748      | 6.1939    | 6.0717      |
| 22  | A    | 168.3541   | 0.0608      | 5.5337    | 3.6722      |
| 23  | A    | 177.7318   | 0.3263      | 5.4361    | 4.0740      |
| 24  | A    | 182.5555   | 0.1332      | 9.1521    | 12.4051     |
| 25  | A    | 186.1902   | 0.0270      | 0.1831    | 0.1585      |
| 26  | A    | 203.4380   | 0.0340      | 14.6221   | 7.9834      |
| 27  | A    | 234.6440   | 0.7002      | 14.0338   | 74.2266     |
| 28  | A    | 242.0436   | 0.6320      | 7.5150    | 59.6181     |
| 29  | A    | 254.8128   | 0.6993      | 0.6347    | 0.1493      |
| 30  | A    | 255.0766   | 0.7111      | 0.5663    | 0.1215      |
| 31  | A    | 279.0063   | 0.8226      | 0.0274    | 7.2869      |
| 32  | A    | 281.3451   | 0.8719      | 0.4457    | 4.2971      |
| 33  | A    | 297.9321   | 0.1307      | 0.1880    | 0.1702      |
| 34  | A    | 298.5550   | 0.9277      | 0.3552    | 0.6589      |
| 35  | A    | 300.2288   | 0.3292      | 0.3595    | 0.7539      |
| 36  | A    | 313.5969   | 0.2532      | 86.9756   | 16.2410     |
| 37  | A    | 324.7618   | 1.0607      | 2.0865    | 2.9738      |
| 38  | A    | 325.8168   | 1.0114      | 3.1470    | 0.7422      |
| 39  | A    | 343.2419   | 1.2895      | 0.1764    | 1.3879      |
| 40  | A    | 343.2742   | 1.2909      | 0.1348    | 1.3529      |
| 41  | A    | 401.2126   | 0.2600      | 0.0059    | 0.0660      |
| 42  | A    | 419.0814   | 0.2712      | 6.5935    | 5.5249      |
| 43  | A    | 462.6589   | 2.2683      | 1.1067    | 1.5519      |
| 44  | A    | 462.7982   | 2.2681      | 2.2943    | 4.4322      |
| 45  | A    | 477.8216   | 0.4849      | 1.7874    | 1.9302      |
| 46  | A    | 529.7846   | 2.9711      | 3.1287    | 0.4537      |
| 47  | A    | 530.1280   | 2.9728      | 3.3380    | 0.4619      |
| 48  | A    | 532.1241   | 2.9520      | 3.8237    | 21.1183     |
| 49  | A    | 533.3570   | 2.9536      | 6.4549    | 18.5633     |
| 50  | A    | 539.1345   | 0.5249      | 16.9419   | 2.6509      |
| 51  | A    | 556.4332   | 3.2935      | 0.2299    | 0.0328      |
| 52  | A    | 556.8735   | 3.2944      | 0.2746    | 0.0520      |
| 53  | A    | 564.1928   | 0.5809      | 0.6757    | 0.5150      |
| 54  | A    | 606.1899   | 3.8811      | 4.3389    | 2.1578      |

|     |   |           |         |          |          |
|-----|---|-----------|---------|----------|----------|
| 55  | A | 607.1517  | 3.8982  | 3.2794   | 1.9554   |
| 56  | A | 681.5375  | 1.8913  | 0.0792   | 3.6542   |
| 57  | A | 700.8303  | 4.7580  | 35.8547  | 0.0480   |
| 58  | A | 702.6782  | 4.7734  | 42.2367  | 0.0814   |
| 59  | A | 739.8503  | 5.5014  | 25.9724  | 32.9706  |
| 60  | A | 741.4123  | 5.4833  | 35.7546  | 33.7599  |
| 61  | A | 743.6930  | 1.0678  | 3.7874   | 1.7875   |
| 62  | A | 766.4952  | 1.7920  | 51.2945  | 35.7308  |
| 63  | A | 822.9351  | 0.6990  | 72.8038  | 2.8363   |
| 64  | A | 836.1389  | 0.5162  | 0.2739   | 0.2118   |
| 65  | A | 884.3059  | 6.1345  | 102.1570 | 105.0640 |
| 66  | A | 885.1031  | 6.1342  | 106.6855 | 125.3753 |
| 67  | A | 947.5655  | 7.5378  | 94.8301  | 0.2396   |
| 68  | A | 949.3968  | 7.5759  | 116.6251 | 0.1406   |
| 69  | A | 959.3647  | 1.5180  | 36.0787  | 11.5200  |
| 70  | A | 967.8881  | 0.7468  | 1.7180   | 1.8691   |
| 71  | A | 992.5235  | 0.8242  | 0.0560   | 0.1422   |
| 72  | A | 1021.5989 | 4.2979  | 71.5027  | 25.1514  |
| 73  | A | 1069.9185 | 1.0695  | 14.7324  | 0.6178   |
| 74  | A | 1088.9852 | 8.3455  | 100.8709 | 17.3822  |
| 75  | A | 1098.5974 | 1.5057  | 23.1700  | 33.4082  |
| 76  | A | 1101.9848 | 9.5666  | 119.7172 | 14.8336  |
| 77  | A | 1119.9180 | 0.9200  | 1.3946   | 2.6705   |
| 78  | A | 1121.9937 | 9.5979  | 35.9601  | 2.1802   |
| 79  | A | 1133.6865 | 9.8725  | 36.4896  | 1.6831   |
| 80  | A | 1139.6152 | 1.2859  | 1.1575   | 0.0243   |
| 81  | A | 1154.3836 | 10.2650 | 11.1961  | 0.4267   |
| 82  | A | 1161.1891 | 1.1613  | 90.8315  | 45.8022  |
| 83  | A | 1163.9341 | 10.4412 | 8.1229   | 0.5014   |
| 84  | A | 1189.8863 | 10.8260 | 455.4639 | 36.0871  |
| 85  | A | 1196.8821 | 1.6844  | 15.4765  | 16.7390  |
| 86  | A | 1199.8631 | 6.2718  | 290.8993 | 15.1879  |
| 87  | A | 1205.7296 | 10.3984 | 300.1860 | 9.0738   |
| 88  | A | 1211.8615 | 11.1587 | 345.7639 | 16.4509  |
| 89  | A | 1234.8546 | 2.4180  | 14.8259  | 0.5246   |
| 90  | A | 1251.1292 | 2.1072  | 380.0444 | 99.0757  |
| 91  | A | 1259.5810 | 6.3703  | 419.7261 | 92.6083  |
| 92  | A | 1259.8076 | 11.5269 | 231.0626 | 0.6587   |
| 93  | A | 1261.5050 | 2.4633  | 238.2984 | 37.0989  |
| 94  | A | 1267.0916 | 11.6222 | 270.2136 | 0.8712   |
| 95  | A | 1312.1268 | 8.0774  | 0.6997   | 4.7042   |
| 96  | A | 1369.0880 | 3.3638  | 117.8983 | 82.2246  |
| 97  | A | 1373.0965 | 1.4976  | 5.1592   | 0.8754   |
| 98  | A | 1448.5725 | 1.4991  | 0.0275   | 5.8700   |
| 99  | A | 1464.1781 | 2.5694  | 12.1257  | 2.6054   |
| 100 | A | 1482.2076 | 1.5357  | 6.4166   | 32.5356  |
| 101 | A | 1494.5278 | 1.3868  | 4.2769   | 1.2629   |
| 102 | A | 1504.1455 | 1.4630  | 23.6951  | 16.4594  |
| 103 | A | 1507.5758 | 1.4300  | 2.0461   | 3.7143   |
| 104 | A | 1528.3011 | 1.5056  | 41.9564  | 10.7676  |
| 105 | A | 1544.2805 | 2.8163  | 110.7823 | 7.7787   |
| 106 | A | 1592.7542 | 10.1899 | 26.9964  | 3.2541   |
| 107 | A | 1643.1347 | 8.1303  | 361.6186 | 100.6215 |
| 108 | A | 3001.3058 | 5.5723  | 32.0543  | 66.7877  |
| 109 | A | 3005.8520 | 5.6027  | 86.5029  | 345.6307 |
| 110 | A | 3100.7473 | 6.1422  | 3.2639   | 33.5407  |
| 111 | A | 3101.9712 | 6.1510  | 19.3559  | 74.0398  |
| 112 | A | 3133.1950 | 6.3852  | 3.1795   | 4.3492   |
| 113 | A | 3140.5075 | 6.4031  | 18.1943  | 107.4777 |
| 114 | A | 3162.5046 | 6.4174  | 10.5945  | 38.4114  |
| 115 | A | 3164.9246 | 6.4476  | 0.6204   | 56.2101  |
| 116 | A | 3226.4585 | 6.6984  | 5.9513   | 131.7462 |
| 117 | A | 3226.6460 | 6.6917  | 3.4537   | 27.4869  |

-----  
pyNR2-iC3H7I\_dimlam

| NM# | Symm | Wavenumber | Force Const | IR Intens | Raman Activ |
|-----|------|------------|-------------|-----------|-------------|
| 1   | A    | -3.1340    | 0.0000      | 0.0908    | 0.4773      |
| 2   | A    | 19.0055    | 0.0011      | 1.0210    | 5.4629      |



|    |   |           |        |          |          |
|----|---|-----------|--------|----------|----------|
| 3  | A | 25.0425   | 0.0014 | 0.7413   | 3.8575   |
| 4  | A | 33.1467   | 0.0050 | 0.8300   | 0.6402   |
| 5  | A | 46.2165   | 0.0053 | 0.4790   | 2.8601   |
| 6  | A | 69.0208   | 0.0156 | 0.5679   | 6.8629   |
| 7  | A | 102.6979  | 0.0166 | 0.0152   | 0.1395   |
| 8  | A | 139.7498  | 0.0391 | 6.1070   | 5.1343   |
| 9  | A | 164.0104  | 0.0191 | 10.9888  | 6.4778   |
| 10 | A | 171.3783  | 0.0221 | 0.3269   | 0.1794   |
| 11 | A | 248.8404  | 0.0812 | 1.0379   | 16.3682  |
| 12 | A | 251.0109  | 0.0416 | 0.0701   | 0.3519   |
| 13 | A | 263.8735  | 0.0977 | 0.3094   | 0.9733   |
| 14 | A | 280.2121  | 0.1556 | 36.5483  | 17.7137  |
| 15 | A | 282.7449  | 0.0965 | 0.0188   | 0.0085   |
| 16 | A | 283.3160  | 0.0626 | 4.1910   | 6.6007   |
| 17 | A | 397.9470  | 0.2547 | 0.0262   | 0.1788   |
| 18 | A | 398.1432  | 0.2066 | 1.4759   | 3.4922   |
| 19 | A | 404.3060  | 0.2761 | 2.0011   | 5.1244   |
| 20 | A | 479.7868  | 0.4911 | 1.9934   | 2.8818   |
| 21 | A | 487.3501  | 0.3979 | 10.1095  | 89.3725  |
| 22 | A | 536.1370  | 0.5007 | 11.9311  | 1.7219   |
| 23 | A | 555.4309  | 0.5586 | 1.2165   | 0.8882   |
| 24 | A | 683.6771  | 1.9085 | 0.3639   | 3.9003   |
| 25 | A | 742.3467  | 1.0529 | 1.0799   | 0.6588   |
| 26 | A | 765.0082  | 1.7189 | 26.5829  | 20.7380  |
| 27 | A | 811.9685  | 0.6966 | 68.1008  | 0.5010   |
| 28 | A | 828.2492  | 0.5056 | 0.3053   | 0.5501   |
| 29 | A | 885.3060  | 1.2516 | 7.0430   | 21.5641  |
| 30 | A | 944.0116  | 0.5997 | 0.9262   | 0.2397   |
| 31 | A | 957.7555  | 0.7121 | 1.1848   | 0.1624   |
| 32 | A | 958.3245  | 0.7717 | 0.4189   | 0.5996   |
| 33 | A | 969.1113  | 1.5908 | 27.4443  | 9.4035   |
| 34 | A | 988.3178  | 0.8208 | 0.0305   | 0.2106   |
| 35 | A | 1008.2497 | 4.3029 | 38.3962  | 28.9504  |
| 36 | A | 1039.8504 | 0.7652 | 7.4741   | 4.8830   |
| 37 | A | 1079.1248 | 1.0437 | 16.4114  | 0.0464   |
| 38 | A | 1095.3476 | 1.4060 | 0.1544   | 6.7677   |
| 39 | A | 1125.9445 | 0.9363 | 0.2211   | 3.5484   |
| 40 | A | 1131.3160 | 1.2323 | 3.8089   | 0.1169   |
| 41 | A | 1138.7574 | 1.7679 | 0.5409   | 2.0224   |
| 42 | A | 1151.9543 | 1.0934 | 41.1630  | 4.3842   |
| 43 | A | 1171.9158 | 1.4334 | 79.4905  | 36.8986  |
| 44 | A | 1200.5636 | 1.4938 | 8.4820   | 5.7893   |
| 45 | A | 1233.3442 | 1.2113 | 62.9529  | 34.9675  |
| 46 | A | 1249.3507 | 2.9858 | 28.2904  | 0.6443   |
| 47 | A | 1256.7224 | 1.1642 | 25.3771  | 8.0004   |
| 48 | A | 1312.4495 | 6.3825 | 1.0129   | 10.5760  |
| 49 | A | 1356.9251 | 1.4470 | 1.0484   | 2.2456   |
| 50 | A | 1375.0913 | 1.5357 | 4.4853   | 1.0646   |
| 51 | A | 1386.4240 | 3.4273 | 93.5265  | 13.1623  |
| 52 | A | 1407.8127 | 1.4740 | 12.8628  | 2.5253   |
| 53 | A | 1422.9734 | 1.4579 | 4.8307   | 5.0078   |
| 54 | A | 1446.5931 | 1.6028 | 0.2153   | 7.4779   |
| 55 | A | 1458.9701 | 2.2916 | 4.3757   | 1.4421   |
| 56 | A | 1481.7276 | 1.3515 | 3.5999   | 4.6813   |
| 57 | A | 1483.0440 | 1.5618 | 15.9977  | 13.6770  |
| 58 | A | 1486.9479 | 1.3609 | 0.0845   | 11.0207  |
| 59 | A | 1490.2405 | 1.3692 | 3.6628   | 2.8465   |
| 60 | A | 1494.4806 | 1.3717 | 13.0909  | 13.1610  |
| 61 | A | 1497.9863 | 1.4220 | 22.1468  | 12.8936  |
| 62 | A | 1506.4081 | 1.3980 | 5.3602   | 1.4881   |
| 63 | A | 1508.5888 | 1.4409 | 0.9231   | 1.7137   |
| 64 | A | 1526.5082 | 1.5892 | 13.1237  | 7.6997   |
| 65 | A | 1544.5590 | 2.7435 | 118.1929 | 3.3087   |
| 66 | A | 1587.2673 | 9.9696 | 41.3101  | 1.5460   |
| 67 | A | 1637.6373 | 8.1230 | 305.1153 | 46.2578  |
| 68 | A | 2980.2044 | 5.5095 | 56.5156  | 90.5275  |
| 69 | A | 2986.0911 | 5.5494 | 109.7596 | 348.2157 |
| 70 | A | 3009.5568 | 5.5722 | 11.2160  | 43.2853  |
| 71 | A | 3014.9770 | 5.5888 | 65.4421  | 618.0072 |
| 72 | A | 3077.7388 | 6.0887 | 16.0395  | 148.1110 |
| 73 | A | 3078.9432 | 6.0622 | 1.1952   | 67.2695  |

|    |   |           |        |         |          |
|----|---|-----------|--------|---------|----------|
| 74 | A | 3079.0498 | 6.0776 | 8.9548  | 3.1539   |
| 75 | A | 3080.1081 | 6.0570 | 31.8332 | 52.2485  |
| 76 | A | 3101.2457 | 6.1787 | 10.4134 | 101.5717 |
| 77 | A | 3114.2842 | 6.2969 | 10.7374 | 26.6638  |
| 78 | A | 3122.7903 | 6.3267 | 3.2685  | 2.3086   |
| 79 | A | 3122.8805 | 6.3114 | 20.8810 | 43.4480  |
| 80 | A | 3132.0984 | 6.3485 | 25.9061 | 101.6022 |
| 81 | A | 3139.7706 | 6.3187 | 38.3732 | 117.8533 |
| 82 | A | 3142.8571 | 6.3516 | 12.0385 | 150.0361 |
| 83 | A | 3215.0823 | 6.6476 | 3.7691  | 122.0001 |
| 84 | A | 3215.1317 | 6.6425 | 10.7162 | 21.4333  |

-----

pyNR2-iC3H7I\_dimlpy

| NM# | Symm | Wavenumber | Force Const | IR Intens | Raman Activ |
|-----|------|------------|-------------|-----------|-------------|
| 1   | A    | -3.2866    | 0.0000      | 0.0051    | 0.7904      |
| 2   | A    | 9.2441     | 0.0002      | 1.4150    | 0.1938      |
| 3   | A    | 15.4289    | 0.0006      | 2.2235    | 0.2184      |
| 4   | A    | 52.0056    | 0.0099      | 0.7725    | 2.9195      |
| 5   | A    | 55.0583    | 0.0134      | 3.8718    | 4.9950      |
| 6   | A    | 60.9531    | 0.0125      | 0.0278    | 0.5686      |
| 7   | A    | 82.6076    | 0.0101      | 0.0107    | 1.1787      |
| 8   | A    | 85.3778    | 0.0091      | 5.0690    | 0.3611      |
| 9   | A    | 149.5634   | 0.0225      | 0.0568    | 3.9752      |
| 10  | A    | 172.7937   | 0.0214      | 0.0990    | 0.1868      |
| 11  | A    | 249.2797   | 0.0812      | 0.1233    | 27.8766     |
| 12  | A    | 250.8370   | 0.0398      | 0.0166    | 0.2748      |
| 13  | A    | 263.6098   | 0.1013      | 0.0953    | 0.5250      |
| 14  | A    | 270.2736   | 0.1104      | 0.2614    | 0.9051      |
| 15  | A    | 271.5335   | 0.1350      | 7.4761    | 1.3737      |
| 16  | A    | 280.7654   | 0.0588      | 0.2006    | 18.2897     |
| 17  | A    | 397.4024   | 0.2843      | 3.4588    | 11.1002     |
| 18  | A    | 399.0829   | 0.2103      | 0.3781    | 8.9228      |
| 19  | A    | 404.9632   | 0.2676      | 0.0185    | 0.2449      |
| 20  | A    | 481.9896   | 0.4989      | 3.3103    | 2.6254      |
| 21  | A    | 493.2185   | 0.4061      | 1.9162    | 149.8278    |
| 22  | A    | 539.2357   | 0.4724      | 18.0580   | 1.4343      |
| 23  | A    | 554.6055   | 0.6100      | 3.3936    | 2.8513      |
| 24  | A    | 682.0298   | 1.8993      | 0.0268    | 3.3472      |
| 25  | A    | 746.2403   | 1.0288      | 0.4299    | 0.2028      |
| 26  | A    | 767.3695   | 1.7241      | 11.6745   | 23.3394     |
| 27  | A    | 814.3893   | 0.7141      | 50.9048   | 0.7115      |
| 28  | A    | 827.9758   | 0.5023      | 0.0008    | 0.3504      |
| 29  | A    | 886.7080   | 1.2434      | 3.3745    | 33.5658     |
| 30  | A    | 941.1933   | 0.5977      | 0.8965    | 0.2815      |
| 31  | A    | 960.2624   | 0.7149      | 0.5080    | 1.0110      |
| 32  | A    | 961.6538   | 0.7747      | 0.4110    | 1.0962      |
| 33  | A    | 970.0671   | 1.6138      | 19.0921   | 27.1218     |
| 34  | A    | 989.1422   | 0.8187      | 0.0038    | 0.2615      |
| 35  | A    | 1011.9358  | 4.2137      | 77.3037   | 24.0955     |
| 36  | A    | 1036.8790  | 0.7557      | 5.8941    | 5.1267      |
| 37  | A    | 1079.9609  | 1.0410      | 21.9430   | 0.2000      |
| 38  | A    | 1095.1240  | 1.4230      | 6.6489    | 22.0908     |
| 39  | A    | 1132.2191  | 1.2051      | 0.9693    | 0.8086      |
| 40  | A    | 1133.6062  | 0.9726      | 0.8998    | 1.6663      |
| 41  | A    | 1136.0024  | 1.7010      | 0.0429    | 2.2390      |
| 42  | A    | 1143.3115  | 1.0412      | 23.5060   | 3.4272      |
| 43  | A    | 1172.4394  | 1.4648      | 72.0946   | 47.7486     |
| 44  | A    | 1201.1026  | 1.4680      | 6.8263    | 10.7955     |
| 45  | A    | 1231.9473  | 1.2162      | 81.6347   | 39.2332     |
| 46  | A    | 1254.5904  | 1.1623      | 54.3885   | 24.4935     |
| 47  | A    | 1256.7418  | 3.1427      | 35.5253   | 0.0148      |
| 48  | A    | 1323.5605  | 5.7723      | 0.8398    | 10.0652     |
| 49  | A    | 1355.2849  | 1.4354      | 0.9638    | 3.2971      |
| 50  | A    | 1376.2649  | 1.5752      | 11.2340   | 0.0898      |
| 51  | A    | 1396.1181  | 3.4167      | 155.5212  | 35.3721     |
| 52  | A    | 1405.6539  | 1.4672      | 11.2394   | 2.5545      |
| 53  | A    | 1420.9520  | 1.4558      | 5.3269    | 6.8894      |
| 54  | A    | 1447.6739  | 1.5362      | 0.4982    | 11.0801     |

|    |   |           |        |          |          |
|----|---|-----------|--------|----------|----------|
| 55 | A | 1463.1226 | 2.5174 | 1.4414   | 0.5296   |
| 56 | A | 1482.7784 | 1.3521 | 3.2638   | 6.8609   |
| 57 | A | 1485.3349 | 1.5910 | 22.1476  | 5.6220   |
| 58 | A | 1487.1206 | 1.3621 | 0.4753   | 9.7731   |
| 59 | A | 1487.8591 | 1.3580 | 2.1958   | 7.0236   |
| 60 | A | 1495.1986 | 1.3730 | 12.9542  | 13.6388  |
| 61 | A | 1495.8128 | 1.3927 | 17.8695  | 20.3073  |
| 62 | A | 1505.9011 | 1.3964 | 5.4134   | 1.9507   |
| 63 | A | 1514.3581 | 1.4645 | 3.9760   | 1.4777   |
| 64 | A | 1528.4880 | 1.6118 | 15.7391  | 16.0881  |
| 65 | A | 1550.0464 | 2.8661 | 144.1815 | 2.2321   |
| 66 | A | 1584.4850 | 9.9127 | 37.3687  | 2.3641   |
| 67 | A | 1641.8640 | 8.1086 | 413.7307 | 72.8794  |
| 68 | A | 2983.4175 | 5.5032 | 71.5571  | 76.3350  |
| 69 | A | 2989.8227 | 5.5489 | 79.9769  | 313.8833 |
| 70 | A | 3003.0899 | 5.5532 | 15.8858  | 52.8440  |
| 71 | A | 3008.5339 | 5.5703 | 99.8376  | 756.9378 |
| 72 | A | 3056.4712 | 5.9894 | 12.5711  | 112.0225 |
| 73 | A | 3057.5058 | 6.0035 | 48.3324  | 77.1128  |
| 74 | A | 3070.4218 | 6.0507 | 11.1115  | 170.6977 |
| 75 | A | 3072.9662 | 6.0666 | 3.7190   | 12.6114  |
| 76 | A | 3091.5931 | 6.1328 | 21.4446  | 133.8094 |
| 77 | A | 3107.7792 | 6.2687 | 13.6548  | 30.3184  |
| 78 | A | 3115.1841 | 6.2856 | 28.3436  | 49.7486  |
| 79 | A | 3120.7665 | 6.3017 | 2.5504   | 1.4581   |
| 80 | A | 3132.5116 | 6.3333 | 37.0359  | 188.9807 |
| 81 | A | 3144.7108 | 6.3396 | 25.0974  | 58.6172  |
| 82 | A | 3147.5859 | 6.3719 | 1.4662   | 73.4760  |
| 83 | A | 3212.9060 | 6.6390 | 8.9979   | 136.3870 |
| 84 | A | 3212.9925 | 6.6347 | 11.7914  | 51.1779  |

-----  
pyNR2-iC3H7I\_dim2am

| NM# | Symm | Wavenumber | Force Const | IR Intens | Raman Activ |
|-----|------|------------|-------------|-----------|-------------|
| 1   | A    | 4.8445     | 0.0000      | 0.1342    | 0.5740      |
| 2   | A    | 17.6797    | 0.0009      | 1.0655    | 5.0916      |
| 3   | A    | 25.4818    | 0.0015      | 0.7980    | 4.0881      |
| 4   | A    | 33.6542    | 0.0054      | 0.8420    | 0.2137      |
| 5   | A    | 46.7355    | 0.0054      | 0.4860    | 2.7048      |
| 6   | A    | 68.9801    | 0.0154      | 0.3357    | 6.7341      |
| 7   | A    | 103.5509   | 0.0168      | 0.0159    | 0.1735      |
| 8   | A    | 140.0764   | 0.0395      | 5.6898    | 5.2003      |
| 9   | A    | 164.4986   | 0.0192      | 10.3542   | 6.5407      |
| 10  | A    | 172.2873   | 0.0224      | 0.3881    | 0.2047      |
| 11  | A    | 248.7989   | 0.0799      | 0.7433    | 16.5102     |
| 12  | A    | 250.8567   | 0.0415      | 0.0741    | 0.6349      |
| 13  | A    | 263.6356   | 0.0998      | 0.3760    | 0.9748      |
| 14  | A    | 280.4813   | 0.1528      | 35.9349   | 15.3080     |
| 15  | A    | 282.9800   | 0.0663      | 2.6084    | 5.4314      |
| 16  | A    | 283.1472   | 0.0891      | 0.9595    | 0.8826      |
| 17  | A    | 398.2381   | 0.2065      | 1.4834    | 4.1810      |
| 18  | A    | 398.5077   | 0.2553      | 0.0271    | 0.1726      |
| 19  | A    | 404.3975   | 0.2763      | 2.1534    | 4.8427      |
| 20  | A    | 479.8137   | 0.4909      | 2.0709    | 3.0296      |
| 21  | A    | 487.5096   | 0.3982      | 9.8841    | 82.5640     |
| 22  | A    | 536.1860   | 0.5006      | 11.5790   | 1.8613      |
| 23  | A    | 555.4666   | 0.5585      | 1.1142    | 1.0781      |
| 24  | A    | 683.6869   | 1.9085      | 0.3582    | 3.8411      |
| 25  | A    | 742.8335   | 1.0484      | 0.9782    | 0.6291      |
| 26  | A    | 764.9972   | 1.7187      | 24.7331   | 20.4156     |
| 27  | A    | 812.2201   | 0.6986      | 67.9941   | 0.5230      |
| 28  | A    | 828.4384   | 0.5057      | 0.3283    | 0.5212      |
| 29  | A    | 884.7815   | 1.2492      | 7.0900    | 21.0581     |
| 30  | A    | 943.7106   | 0.5990      | 0.9539    | 0.2044      |
| 31  | A    | 957.9849   | 0.7132      | 1.1534    | 0.1639      |
| 32  | A    | 958.1973   | 0.7725      | 0.4124    | 0.6546      |
| 33  | A    | 969.2025   | 1.5900      | 28.6050   | 9.2945      |
| 34  | A    | 988.8965   | 0.8222      | 0.0290    | 0.1985      |
| 35  | A    | 1008.2399  | 4.2993      | 38.2245   | 27.6968     |

|    |   |           |        |          |          |
|----|---|-----------|--------|----------|----------|
| 36 | A | 1038.5847 | 0.7616 | 7.3362   | 4.4546   |
| 37 | A | 1079.2593 | 1.0438 | 16.4732  | 0.0580   |
| 38 | A | 1095.3094 | 1.4061 | 0.1578   | 6.7085   |
| 39 | A | 1126.0804 | 0.9369 | 0.2198   | 3.7108   |
| 40 | A | 1131.3104 | 1.2315 | 3.8696   | 0.1174   |
| 41 | A | 1138.5107 | 1.7654 | 0.6079   | 2.2870   |
| 42 | A | 1151.9696 | 1.0926 | 37.0917  | 3.8584   |
| 43 | A | 1171.5394 | 1.4305 | 76.8996  | 34.8396  |
| 44 | A | 1200.6485 | 1.4935 | 8.0930   | 5.7701   |
| 45 | A | 1232.6943 | 1.2155 | 61.7806  | 31.8012  |
| 46 | A | 1249.4624 | 2.9859 | 28.3836  | 0.6050   |
| 47 | A | 1256.7039 | 1.1642 | 25.2133  | 7.8462   |
| 48 | A | 1312.5485 | 6.3720 | 1.0230   | 10.1327  |
| 49 | A | 1356.0441 | 1.4466 | 0.9332   | 2.3740   |
| 50 | A | 1375.1204 | 1.5362 | 4.5170   | 1.0585   |
| 51 | A | 1386.6750 | 3.4260 | 91.9175  | 12.3994  |
| 52 | A | 1408.2702 | 1.4735 | 12.4165  | 2.4208   |
| 53 | A | 1423.4364 | 1.4578 | 5.6891   | 4.0345   |
| 54 | A | 1446.7039 | 1.6060 | 0.2106   | 7.4283   |
| 55 | A | 1459.0425 | 2.2871 | 4.3394   | 1.4352   |
| 56 | A | 1481.4485 | 1.3506 | 3.1743   | 5.6996   |
| 57 | A | 1483.1907 | 1.5620 | 16.0633  | 13.6017  |
| 58 | A | 1487.1208 | 1.3618 | 0.2977   | 9.0756   |
| 59 | A | 1490.3654 | 1.3693 | 3.1649   | 3.6625   |
| 60 | A | 1494.4044 | 1.3712 | 14.3521  | 12.4709  |
| 61 | A | 1498.0587 | 1.4227 | 21.8098  | 13.4265  |
| 62 | A | 1506.4831 | 1.3986 | 5.3592   | 1.6655   |
| 63 | A | 1508.8096 | 1.4410 | 1.1318   | 1.7687   |
| 64 | A | 1526.6376 | 1.5908 | 12.2484  | 7.7158   |
| 65 | A | 1544.6743 | 2.7399 | 113.8942 | 2.9874   |
| 66 | A | 1587.1753 | 9.9608 | 41.1359  | 1.5472   |
| 67 | A | 1637.6279 | 8.1204 | 294.9325 | 45.2405  |
| 68 | A | 2980.2887 | 5.5097 | 56.7058  | 92.4569  |
| 69 | A | 2986.1739 | 5.5496 | 112.0850 | 355.8344 |
| 70 | A | 3009.6918 | 5.5743 | 11.1143  | 43.5654  |
| 71 | A | 3015.1355 | 5.5909 | 62.5241  | 601.9493 |
| 72 | A | 3078.8345 | 6.0895 | 13.2478  | 128.7310 |
| 73 | A | 3078.9347 | 6.0449 | 8.1542   | 56.7097  |
| 74 | A | 3080.0744 | 6.0570 | 30.6497  | 56.8738  |
| 75 | A | 3080.5696 | 6.0988 | 3.3735   | 25.0954  |
| 76 | A | 3100.4535 | 6.1747 | 11.3907  | 111.6740 |
| 77 | A | 3114.5802 | 6.2998 | 11.1396  | 27.9057  |
| 78 | A | 3122.8210 | 6.3267 | 3.4275   | 2.4387   |
| 79 | A | 3123.0543 | 6.3146 | 21.6396  | 45.8593  |
| 80 | A | 3132.1352 | 6.3486 | 25.6571  | 104.4783 |
| 81 | A | 3139.6457 | 6.3181 | 38.3340  | 114.5437 |
| 82 | A | 3142.7324 | 6.3511 | 11.5532  | 147.3366 |
| 83 | A | 3215.0665 | 6.6477 | 3.4875   | 124.7766 |
| 84 | A | 3215.1152 | 6.6423 | 10.8936  | 18.6320  |

-----  
pyNR2-iC3H7I\_trml

| NM# | Symm | Wavenumber | Force Const | IR Intens | Raman Activ |
|-----|------|------------|-------------|-----------|-------------|
| 1   | A    | -2.4148    | 0.0000      | 0.0007    | 0.4049      |
| 2   | A    | 0.5844     | 0.0000      | 0.0000    | 0.3925      |
| 3   | A    | 7.3653     | 0.0002      | 0.1886    | 1.9952      |
| 4   | A    | 9.5607     | 0.0002      | 0.9715    | 0.2829      |
| 5   | A    | 19.8108    | 0.0012      | 1.1378    | 0.5782      |
| 6   | A    | 25.2364    | 0.0015      | 0.8109    | 3.4930      |
| 7   | A    | 28.5648    | 0.0036      | 1.5862    | 1.7011      |
| 8   | A    | 47.1248    | 0.0055      | 0.4559    | 2.7255      |
| 9   | A    | 55.3457    | 0.0140      | 1.0464    | 3.3953      |
| 10  | A    | 57.5244    | 0.0144      | 2.6506    | 3.2883      |
| 11  | A    | 61.4582    | 0.0126      | 0.0261    | 0.5826      |
| 12  | A    | 69.8690    | 0.0144      | 0.3078    | 9.8981      |
| 13  | A    | 103.0352   | 0.0163      | 0.0071    | 0.1399      |
| 14  | A    | 146.7432   | 0.0481      | 12.3585   | 7.8756      |
| 15  | A    | 161.3639   | 0.0181      | 8.4752    | 6.4217      |
| 16  | A    | 171.9869   | 0.0222      | 0.1841    | 0.2178      |

|    |   |           |        |          |          |
|----|---|-----------|--------|----------|----------|
| 17 | A | 248.8541  | 0.0815 | 1.1902   | 14.8661  |
| 18 | A | 249.3959  | 0.0812 | 0.0774   | 30.0623  |
| 19 | A | 250.8068  | 0.0397 | 0.0158   | 0.2648   |
| 20 | A | 251.2476  | 0.0417 | 0.0698   | 0.3335   |
| 21 | A | 263.7781  | 0.0974 | 0.3263   | 0.9278   |
| 22 | A | 265.7070  | 0.1092 | 0.0915   | 1.2906   |
| 23 | A | 280.5633  | 0.0639 | 5.0566   | 23.2803  |
| 24 | A | 281.2748  | 0.1215 | 30.1350  | 16.4614  |
| 25 | A | 283.5099  | 0.0643 | 6.3337   | 6.5184   |
| 26 | A | 283.6054  | 0.1006 | 0.0220   | 0.1196   |
| 27 | A | 398.1178  | 0.2063 | 1.4350   | 3.7404   |
| 28 | A | 399.0322  | 0.2079 | 0.7512   | 5.7430   |
| 29 | A | 400.9127  | 0.2604 | 0.0197   | 0.2064   |
| 30 | A | 406.9374  | 0.2799 | 2.7675   | 12.7012  |
| 31 | A | 480.7476  | 0.4936 | 2.5300   | 2.2346   |
| 32 | A | 487.1956  | 0.3978 | 11.3603  | 88.1947  |
| 33 | A | 493.3677  | 0.4063 | 2.0744   | 162.2044 |
| 34 | A | 536.7200  | 0.4873 | 13.3483  | 4.5899   |
| 35 | A | 556.9586  | 0.5880 | 0.2742   | 2.0103   |
| 36 | A | 682.6404  | 1.8996 | 0.0512   | 3.1313   |
| 37 | A | 742.5036  | 1.0630 | 1.2866   | 0.4253   |
| 38 | A | 766.7506  | 1.7319 | 31.8682  | 26.9178  |
| 39 | A | 812.5033  | 0.6930 | 67.0040  | 0.9490   |
| 40 | A | 828.2090  | 0.5052 | 0.3084   | 0.4167   |
| 41 | A | 885.2326  | 1.2519 | 7.3913   | 21.4259  |
| 42 | A | 886.6931  | 1.2431 | 3.2795   | 36.3637  |
| 43 | A | 941.0909  | 0.5976 | 0.8773   | 0.2988   |
| 44 | A | 944.2106  | 0.6000 | 0.9129   | 0.2479   |
| 45 | A | 958.1418  | 0.7714 | 0.4140   | 0.5784   |
| 46 | A | 959.3202  | 0.7187 | 1.3417   | 0.9632   |
| 47 | A | 961.7297  | 0.7747 | 0.3997   | 1.1138   |
| 48 | A | 969.1998  | 1.5725 | 28.4227  | 18.7210  |
| 49 | A | 987.5917  | 0.8166 | 0.0398   | 0.2320   |
| 50 | A | 1013.2581 | 4.2817 | 69.0944  | 29.3094  |
| 51 | A | 1036.7268 | 0.7553 | 6.2339   | 5.1130   |
| 52 | A | 1040.0893 | 0.7660 | 8.1206   | 4.8292   |
| 53 | A | 1079.7690 | 1.0462 | 17.0056  | 0.0242   |
| 54 | A | 1096.6520 | 1.4222 | 7.6471   | 22.2952  |
| 55 | A | 1127.0949 | 0.9319 | 0.4030   | 3.4925   |
| 56 | A | 1133.2965 | 1.3040 | 1.9696   | 0.6955   |
| 57 | A | 1135.9887 | 1.6464 | 0.0005   | 1.6092   |
| 58 | A | 1138.9629 | 1.7674 | 0.5466   | 1.9708   |
| 59 | A | 1151.1294 | 1.0868 | 55.9691  | 10.2427  |
| 60 | A | 1171.7772 | 1.4352 | 111.1822 | 25.7133  |
| 61 | A | 1172.5637 | 1.4621 | 44.2850  | 66.8074  |
| 62 | A | 1200.9147 | 1.4876 | 11.9182  | 9.4196   |
| 63 | A | 1231.8129 | 1.2163 | 90.3605  | 32.4528  |
| 64 | A | 1233.5048 | 1.2110 | 54.7592  | 50.4415  |
| 65 | A | 1251.1314 | 2.9416 | 26.0421  | 0.2313   |
| 66 | A | 1255.0740 | 1.1611 | 48.1398  | 23.5450  |
| 67 | A | 1318.1806 | 6.5977 | 0.8119   | 7.3383   |
| 68 | A | 1355.2263 | 1.4348 | 0.9801   | 3.3474   |
| 69 | A | 1357.1002 | 1.4475 | 1.0709   | 2.1696   |
| 70 | A | 1374.5370 | 1.5364 | 7.1406   | 0.3012   |
| 71 | A | 1388.5510 | 3.4050 | 132.1169 | 47.8903  |
| 72 | A | 1405.5411 | 1.4669 | 11.1525  | 2.6295   |
| 73 | A | 1407.9003 | 1.4742 | 13.0254  | 2.5919   |
| 74 | A | 1420.8377 | 1.4555 | 5.3042   | 7.6294   |
| 75 | A | 1423.0567 | 1.4580 | 4.8033   | 5.1768   |
| 76 | A | 1447.8089 | 1.5385 | 0.0784   | 8.2759   |
| 77 | A | 1461.8195 | 2.4732 | 5.1825   | 1.0984   |
| 78 | A | 1481.7223 | 1.3516 | 3.5674   | 4.3937   |
| 79 | A | 1482.7916 | 1.3521 | 3.2648   | 6.8252   |
| 80 | A | 1483.5033 | 1.5652 | 18.3235  | 13.1614  |
| 81 | A | 1486.9606 | 1.3609 | 0.0850   | 10.3746  |
| 82 | A | 1487.1265 | 1.3622 | 0.4691   | 9.8868   |
| 83 | A | 1490.4617 | 1.3690 | 3.5684   | 3.1516   |
| 84 | A | 1494.4575 | 1.3717 | 12.8102  | 13.3082  |
| 85 | A | 1495.2059 | 1.3730 | 12.1127  | 14.5981  |
| 86 | A | 1498.2970 | 1.4175 | 21.8216  | 15.7774  |
| 87 | A | 1505.8773 | 1.3964 | 5.5023   | 2.0573   |

|     |   |           |         |          |          |
|-----|---|-----------|---------|----------|----------|
| 88  | A | 1506.4575 | 1.3981  | 5.3390   | 1.5811   |
| 89  | A | 1509.2158 | 1.4489  | 0.8746   | 1.2838   |
| 90  | A | 1526.8916 | 1.5780  | 22.0799  | 14.8788  |
| 91  | A | 1547.3538 | 2.8443  | 130.3515 | 3.9375   |
| 92  | A | 1588.0710 | 10.1192 | 32.7865  | 2.2377   |
| 93  | A | 1640.4962 | 8.1230  | 393.0078 | 83.0675  |
| 94  | A | 2982.4735 | 5.5148  | 55.6874  | 94.4845  |
| 95  | A | 2988.2995 | 5.5547  | 110.6430 | 349.5665 |
| 96  | A | 3002.7983 | 5.5523  | 15.9599  | 54.7205  |
| 97  | A | 3008.2420 | 5.5694  | 106.4518 | 786.1272 |
| 98  | A | 3009.8692 | 5.5732  | 10.9451  | 43.6511  |
| 99  | A | 3015.2923 | 5.5898  | 65.2463  | 635.8090 |
| 100 | A | 3070.0761 | 6.0490  | 10.9097  | 168.9561 |
| 101 | A | 3072.6846 | 6.0653  | 3.6781   | 12.5475  |
| 102 | A | 3078.1382 | 6.0460  | 6.3217   | 60.8262  |
| 103 | A | 3078.1419 | 6.0899  | 18.4571  | 141.5067 |
| 104 | A | 3079.2278 | 6.0602  | 30.0157  | 63.1077  |
| 105 | A | 3079.3503 | 6.0980  | 3.3912   | 10.4189  |
| 106 | A | 3091.1757 | 6.1309  | 22.1757  | 136.1878 |
| 107 | A | 3101.8692 | 6.1818  | 9.9818   | 97.7558  |
| 108 | A | 3107.5112 | 6.2675  | 13.5861  | 29.4980  |
| 109 | A | 3114.6842 | 6.2986  | 10.4839  | 26.2366  |
| 110 | A | 3114.8567 | 6.2844  | 28.1226  | 49.1287  |
| 111 | A | 3123.3920 | 6.3130  | 20.3109  | 41.4453  |
| 112 | A | 3123.6994 | 6.3285  | 2.7055   | 1.6697   |
| 113 | A | 3133.3104 | 6.3515  | 27.7407  | 128.8596 |
| 114 | A | 3145.1306 | 6.3416  | 24.6622  | 60.1423  |
| 115 | A | 3148.0375 | 6.3743  | 1.6389   | 73.9488  |
| 116 | A | 3216.9638 | 6.6566  | 7.5113   | 131.2076 |
| 117 | A | 3217.0440 | 6.6502  | 9.5617   | 24.3333  |

pyNR2-iC3H7I\_trm2

| NM# | Symm | Wavenumber | Force Const | IR Intens | Raman Activ |
|-----|------|------------|-------------|-----------|-------------|
| 1   | A    | -2.4138    | 0.0000      | 0.0022    | 0.3929      |
| 2   | A    | -2.2329    | 0.0000      | 0.0026    | 0.6461      |
| 3   | A    | 6.8322     | 0.0002      | 0.1632    | 2.1795      |
| 4   | A    | 9.5276     | 0.0002      | 0.9498    | 0.2345      |
| 5   | A    | 18.7532    | 0.0011      | 1.2584    | 0.3779      |
| 6   | A    | 24.7980    | 0.0014      | 0.8408    | 3.2545      |
| 7   | A    | 28.4769    | 0.0040      | 1.5954    | 0.9555      |
| 8   | A    | 47.1675    | 0.0055      | 0.4562    | 2.7013      |
| 9   | A    | 55.4276    | 0.0142      | 1.4503    | 3.4129      |
| 10  | A    | 57.8200    | 0.0146      | 1.9983    | 2.8947      |
| 11  | A    | 61.4602    | 0.0126      | 0.0264    | 0.5596      |
| 12  | A    | 69.3583    | 0.0140      | 0.1597    | 9.4251      |
| 13  | A    | 102.3769   | 0.0161      | 0.0067    | 0.1563      |
| 14  | A    | 146.5852   | 0.0486      | 12.2080   | 8.1545      |
| 15  | A    | 160.2651   | 0.0178      | 7.1876    | 6.2676      |
| 16  | A    | 171.3944   | 0.0220      | 0.1848    | 0.2049      |
| 17  | A    | 248.8868   | 0.0819      | 0.8613    | 17.6490     |
| 18  | A    | 249.3867   | 0.0812      | 0.2396    | 25.3900     |
| 19  | A    | 250.7918   | 0.0397      | 0.0159    | 0.2626      |
| 20  | A    | 251.0293   | 0.0411      | 0.0669    | 0.2920      |
| 21  | A    | 263.6203   | 0.0999      | 0.3152    | 0.9718      |
| 22  | A    | 265.6949   | 0.1093      | 0.0941    | 1.2658      |
| 23  | A    | 280.5460   | 0.0639      | 4.8215    | 24.0252     |
| 24  | A    | 281.2628   | 0.1243      | 30.3257   | 12.8574     |
| 25  | A    | 283.3161   | 0.0636      | 3.9338    | 6.0812      |
| 26  | A    | 283.3221   | 0.1004      | 0.0465    | 0.1543      |
| 27  | A    | 398.1907   | 0.2063      | 1.5964    | 3.9834      |
| 28  | A    | 399.0375   | 0.2079      | 0.7581    | 5.7828      |
| 29  | A    | 401.6149   | 0.2610      | 0.0226    | 0.1932      |
| 30  | A    | 406.7434   | 0.2802      | 3.0925    | 12.2982     |
| 31  | A    | 480.7960   | 0.4937      | 2.5599    | 2.2102      |
| 32  | A    | 487.2799   | 0.3977      | 10.3736   | 79.7161     |
| 33  | A    | 493.3518   | 0.4063      | 2.0831    | 158.9121    |
| 34  | A    | 536.6394   | 0.4867      | 12.9393   | 4.7270      |
| 35  | A    | 556.9202   | 0.5888      | 0.4418    | 2.1074      |

|     |   |           |         |          |          |
|-----|---|-----------|---------|----------|----------|
| 36  | A | 682.6391  | 1.8997  | 0.0491   | 3.0710   |
| 37  | A | 742.9727  | 1.0591  | 1.1456   | 0.4048   |
| 38  | A | 766.7363  | 1.7321  | 29.0595  | 26.1674  |
| 39  | A | 812.5977  | 0.6943  | 66.9113  | 0.8985   |
| 40  | A | 828.2098  | 0.5052  | 0.3452   | 0.3947   |
| 41  | A | 884.5897  | 1.2486  | 7.4678   | 20.1804  |
| 42  | A | 886.6846  | 1.2430  | 3.2595   | 35.7325  |
| 43  | A | 941.0820  | 0.5976  | 0.8736   | 0.2939   |
| 44  | A | 943.8949  | 0.5991  | 0.9489   | 0.1892   |
| 45  | A | 957.9882  | 0.7724  | 0.4367   | 0.6543   |
| 46  | A | 959.5003  | 0.7201  | 1.3132   | 1.0295   |
| 47  | A | 961.7282  | 0.7748  | 0.3967   | 1.1155   |
| 48  | A | 969.2654  | 1.5700  | 29.7438  | 18.6503  |
| 49  | A | 988.1996  | 0.8181  | 0.0374   | 0.2296   |
| 50  | A | 1013.2544 | 4.2744  | 68.6470  | 27.6732  |
| 51  | A | 1036.6950 | 0.7553  | 6.1117   | 5.2215   |
| 52  | A | 1038.4201 | 0.7613  | 7.1419   | 4.6783   |
| 53  | A | 1079.8158 | 1.0461  | 17.0595  | 0.0306   |
| 54  | A | 1096.6084 | 1.4223  | 7.5419   | 21.7033  |
| 55  | A | 1127.1761 | 0.9321  | 0.3989   | 3.6779   |
| 56  | A | 1133.2942 | 1.3043  | 2.0046   | 0.6698   |
| 57  | A | 1135.9834 | 1.6456  | 0.0002   | 1.6354   |
| 58  | A | 1138.5673 | 1.7639  | 0.5566   | 2.2670   |
| 59  | A | 1150.9713 | 1.0855  | 50.5197  | 9.1870   |
| 60  | A | 1171.3550 | 1.4292  | 85.9148  | 29.2116  |
| 61  | A | 1172.5179 | 1.4640  | 63.4985  | 56.7895  |
| 62  | A | 1200.9284 | 1.4870  | 11.3225  | 9.3645   |
| 63  | A | 1231.7028 | 1.2168  | 90.7216  | 28.5113  |
| 64  | A | 1232.7444 | 1.2163  | 51.8200  | 46.4159  |
| 65  | A | 1251.3188 | 2.9438  | 26.1847  | 0.2190   |
| 66  | A | 1255.0447 | 1.1611  | 47.9450  | 22.8481  |
| 67  | A | 1318.3534 | 6.5816  | 0.8127   | 6.9769   |
| 68  | A | 1355.2082 | 1.4348  | 1.0018   | 3.3082   |
| 69  | A | 1356.0964 | 1.4466  | 0.8065   | 2.3767   |
| 70  | A | 1374.5763 | 1.5371  | 7.1987   | 0.3045   |
| 71  | A | 1388.8501 | 3.4042  | 129.9791 | 44.9364  |
| 72  | A | 1405.5491 | 1.4669  | 11.2347  | 2.6102   |
| 73  | A | 1408.4090 | 1.4741  | 12.2672  | 2.3510   |
| 74  | A | 1420.8464 | 1.4555  | 5.2760   | 7.5499   |
| 75  | A | 1423.5289 | 1.4577  | 5.5426   | 3.4473   |
| 76  | A | 1447.8549 | 1.5386  | 0.0697   | 8.2675   |
| 77  | A | 1461.8807 | 2.4742  | 5.1402   | 1.1187   |
| 78  | A | 1481.3215 | 1.3500  | 3.3258   | 6.4624   |
| 79  | A | 1482.7910 | 1.3521  | 3.2435   | 6.7866   |
| 80  | A | 1483.5697 | 1.5656  | 18.1786  | 12.3645  |
| 81  | A | 1487.1268 | 1.3622  | 0.4634   | 9.4983   |
| 82  | A | 1487.2394 | 1.3619  | 0.2810   | 8.8878   |
| 83  | A | 1490.3511 | 1.3686  | 3.2653   | 4.5552   |
| 84  | A | 1494.3518 | 1.3710  | 14.0310  | 11.8246  |
| 85  | A | 1495.2091 | 1.3730  | 12.0514  | 14.5007  |
| 86  | A | 1498.1714 | 1.4172  | 21.2738  | 16.9452  |
| 87  | A | 1505.8752 | 1.3964  | 5.5324   | 2.0669   |
| 88  | A | 1506.6548 | 1.3988  | 5.7139   | 1.3935   |
| 89  | A | 1509.2845 | 1.4495  | 0.8558   | 1.3416   |
| 90  | A | 1526.8667 | 1.5778  | 20.7842  | 14.8054  |
| 91  | A | 1547.4465 | 2.8488  | 124.8604 | 3.2936   |
| 92  | A | 1587.9696 | 10.1123 | 32.6615  | 2.2298   |
| 93  | A | 1640.5074 | 8.1211  | 379.7784 | 80.2909  |
| 94  | A | 2982.5789 | 5.5149  | 56.0001  | 97.0378  |
| 95  | A | 2988.4112 | 5.5549  | 113.4504 | 359.4280 |
| 96  | A | 3002.8179 | 5.5524  | 15.9477  | 54.3232  |
| 97  | A | 3008.2593 | 5.5695  | 105.1794 | 781.3970 |
| 98  | A | 3010.0042 | 5.5754  | 10.9078  | 43.4879  |
| 99  | A | 3015.4436 | 5.5919  | 60.1019  | 597.6666 |
| 100 | A | 3070.0874 | 6.0490  | 10.8435  | 168.1936 |
| 101 | A | 3072.7056 | 6.0654  | 3.6837   | 12.5188  |
| 102 | A | 3077.8933 | 6.0455  | 6.8023   | 58.2558  |
| 103 | A | 3078.9318 | 6.0594  | 39.2939  | 30.6975  |
| 104 | A | 3079.6398 | 6.0928  | 6.4177   | 169.2738 |
| 105 | A | 3080.9508 | 6.1004  | 3.0651   | 13.4099  |
| 106 | A | 3091.1470 | 6.1308  | 22.1194  | 134.4955 |

|     |   |           |        |         |          |
|-----|---|-----------|--------|---------|----------|
| 107 | A | 3100.7408 | 6.1766 | 11.0194 | 116.8467 |
| 108 | A | 3107.5065 | 6.2675 | 13.5830 | 29.3926  |
| 109 | A | 3114.8015 | 6.3017 | 11.1072 | 27.5680  |
| 110 | A | 3114.8477 | 6.2844 | 28.0707 | 48.8503  |
| 111 | A | 3123.4350 | 6.3158 | 21.9098 | 47.4805  |
| 112 | A | 3123.6537 | 6.3280 | 2.6709  | 1.6226   |
| 113 | A | 3133.3022 | 6.3512 | 27.5009 | 133.4518 |
| 114 | A | 3145.0121 | 6.3411 | 24.6118 | 57.9173  |
| 115 | A | 3147.9192 | 6.3738 | 1.5028  | 72.7377  |
| 116 | A | 3216.9469 | 6.6565 | 7.3671  | 130.6976 |
| 117 | A | 3217.0281 | 6.6502 | 9.5254  | 24.7756  |

-----  
pyNR2-iC3H7I\_trm3

-----  
NM# Symm Wavenumber Force Const IR Intens Raman Activ  
-----

pyNR2-iC3H7I\_trm4

-----  
NM# Symm Wavenumber Force Const IR Intens Raman Activ  
-----

|    |   |           |        |         |          |
|----|---|-----------|--------|---------|----------|
| 1  | A | 1.7245    | 0.0000 | 0.0104  | 0.3598   |
| 2  | A | 3.8411    | 0.0000 | 0.0014  | 0.5541   |
| 3  | A | 6.8522    | 0.0001 | 0.1461  | 1.5613   |
| 4  | A | 10.3988   | 0.0003 | 0.9973  | 0.6353   |
| 5  | A | 18.5485   | 0.0010 | 1.2414  | 0.6290   |
| 6  | A | 24.8490   | 0.0014 | 0.8400  | 3.6867   |
| 7  | A | 28.4857   | 0.0039 | 1.4819  | 0.7115   |
| 8  | A | 47.0924   | 0.0056 | 0.5002  | 2.4007   |
| 9  | A | 53.2935   | 0.0115 | 1.2222  | 2.0278   |
| 10 | A | 58.3889   | 0.0148 | 2.0090  | 3.0208   |
| 11 | A | 63.4147   | 0.0150 | 0.3502  | 2.0124   |
| 12 | A | 69.3925   | 0.0141 | 0.1305  | 8.8430   |
| 13 | A | 102.2059  | 0.0160 | 0.0074  | 0.1691   |
| 14 | A | 146.5456  | 0.0484 | 11.8502 | 7.5849   |
| 15 | A | 160.5081  | 0.0179 | 7.4860  | 6.1967   |
| 16 | A | 171.4871  | 0.0221 | 0.1839  | 0.2480   |
| 17 | A | 248.8257  | 0.0798 | 0.9087  | 15.1028  |
| 18 | A | 249.3268  | 0.0802 | 0.0198  | 27.1911  |
| 19 | A | 250.3166  | 0.0398 | 0.0735  | 0.2436   |
| 20 | A | 250.8147  | 0.0416 | 0.0760  | 0.7135   |
| 21 | A | 263.4964  | 0.0992 | 0.4235  | 0.8785   |
| 22 | A | 265.0674  | 0.1091 | 2.7260  | 3.1773   |
| 23 | A | 280.7659  | 0.0602 | 1.6511  | 22.4353  |
| 24 | A | 281.8447  | 0.1215 | 26.0780 | 14.4107  |
| 25 | A | 282.8186  | 0.0988 | 0.1827  | 0.2452   |
| 26 | A | 283.2305  | 0.0693 | 8.1122  | 4.2712   |
| 27 | A | 398.1805  | 0.2063 | 1.5633  | 3.9535   |
| 28 | A | 399.4835  | 0.2087 | 0.8710  | 5.7761   |
| 29 | A | 401.6491  | 0.2610 | 0.0247  | 0.2247   |
| 30 | A | 406.7184  | 0.2801 | 3.1570  | 13.0207  |
| 31 | A | 480.7281  | 0.4927 | 2.7876  | 2.9920   |
| 32 | A | 487.3535  | 0.3981 | 10.3240 | 79.2142  |
| 33 | A | 493.4197  | 0.4066 | 1.7977  | 157.7893 |
| 34 | A | 536.6537  | 0.4872 | 13.1036 | 3.5051   |
| 35 | A | 556.9069  | 0.5885 | 0.3834  | 2.2999   |
| 36 | A | 682.6376  | 1.8995 | 0.0572  | 3.1219   |
| 37 | A | 742.8750  | 1.0605 | 1.1272  | 0.4203   |
| 38 | A | 766.7384  | 1.7320 | 28.7285 | 25.8338  |
| 39 | A | 812.6267  | 0.6938 | 66.7467 | 0.9009   |
| 40 | A | 828.4032  | 0.5054 | 0.3517  | 0.3913   |
| 41 | A | 884.6206  | 1.2489 | 7.4642  | 19.8206  |
| 42 | A | 886.7968  | 1.2435 | 3.3241  | 35.6480  |
| 43 | A | 940.9756  | 0.5971 | 0.9002  | 0.2783   |
| 44 | A | 943.7861  | 0.5990 | 0.9624  | 0.1944   |
| 45 | A | 957.9970  | 0.7724 | 0.4219  | 0.6289   |
| 46 | A | 959.4723  | 0.7200 | 1.3494  | 0.9283   |
| 47 | A | 961.6641  | 0.7752 | 0.3979  | 1.0535   |
| 48 | A | 969.2476  | 1.5694 | 29.7664 | 18.6281  |
| 49 | A | 988.4165  | 0.8184 | 0.0333  | 0.1947   |
| 50 | A | 1013.2510 | 4.2775 | 68.6755 | 28.0060  |



|     |   |           |         |          |          |
|-----|---|-----------|---------|----------|----------|
| 51  | A | 1036.7531 | 0.7555  | 6.1198   | 4.4458   |
| 52  | A | 1038.5906 | 0.7617  | 7.1213   | 4.7465   |
| 53  | A | 1079.7422 | 1.0460  | 17.0913  | 0.0281   |
| 54  | A | 1096.6188 | 1.4224  | 7.4804   | 21.6818  |
| 55  | A | 1127.1953 | 0.9315  | 0.4233   | 3.8156   |
| 56  | A | 1133.8216 | 1.2293  | 1.7085   | 0.0763   |
| 57  | A | 1135.4488 | 1.7823  | 0.3510   | 2.3282   |
| 58  | A | 1138.6214 | 1.7638  | 0.6252   | 2.3685   |
| 59  | A | 1150.9626 | 1.0855  | 50.2280  | 9.2240   |
| 60  | A | 1171.3319 | 1.4296  | 80.9762  | 29.4660  |
| 61  | A | 1172.5843 | 1.4640  | 67.2743  | 55.2658  |
| 62  | A | 1200.8923 | 1.4870  | 11.2336  | 9.4190   |
| 63  | A | 1231.6518 | 1.2166  | 88.0152  | 30.4127  |
| 64  | A | 1232.7376 | 1.2157  | 53.4896  | 43.5585  |
| 65  | A | 1251.3363 | 2.9442  | 26.2750  | 0.2358   |
| 66  | A | 1255.0619 | 1.1612  | 47.9112  | 22.9160  |
| 67  | A | 1318.3339 | 6.5803  | 0.8163   | 7.0179   |
| 68  | A | 1354.7123 | 1.4356  | 1.0626   | 3.3338   |
| 69  | A | 1356.0143 | 1.4473  | 0.9281   | 2.4151   |
| 70  | A | 1374.6045 | 1.5372  | 7.1613   | 0.3037   |
| 71  | A | 1388.8208 | 3.4048  | 129.9224 | 44.2821  |
| 72  | A | 1405.5951 | 1.4659  | 10.8759  | 2.7125   |
| 73  | A | 1408.3999 | 1.4736  | 12.3177  | 2.3885   |
| 74  | A | 1420.9995 | 1.4557  | 5.4112   | 7.4848   |
| 75  | A | 1423.5799 | 1.4579  | 5.6034   | 3.5712   |
| 76  | A | 1447.7996 | 1.5371  | 0.0754   | 8.2179   |
| 77  | A | 1461.8925 | 2.4777  | 5.1836   | 1.2098   |
| 78  | A | 1481.3476 | 1.3504  | 3.1769   | 5.9320   |
| 79  | A | 1482.8037 | 1.3520  | 3.1087   | 7.4831   |
| 80  | A | 1483.5542 | 1.5652  | 18.0340  | 13.0289  |
| 81  | A | 1487.0378 | 1.3621  | 0.6231   | 9.1151   |
| 82  | A | 1487.1360 | 1.3619  | 0.3046   | 9.4631   |
| 83  | A | 1490.2956 | 1.3685  | 3.1281   | 3.9137   |
| 84  | A | 1494.3623 | 1.3711  | 14.4137  | 12.2443  |
| 85  | A | 1495.2531 | 1.3731  | 12.3173  | 14.2366  |
| 86  | A | 1498.1513 | 1.4170  | 21.1571  | 16.6242  |
| 87  | A | 1505.7892 | 1.3962  | 5.3820   | 1.9802   |
| 88  | A | 1506.5099 | 1.3987  | 5.4657   | 1.5427   |
| 89  | A | 1509.3809 | 1.4494  | 1.0940   | 1.3484   |
| 90  | A | 1526.9322 | 1.5779  | 20.7128  | 14.6202  |
| 91  | A | 1547.4206 | 2.8483  | 125.1365 | 3.1243   |
| 92  | A | 1587.9840 | 10.1121 | 32.9546  | 2.2662   |
| 93  | A | 1640.5058 | 8.1207  | 379.5121 | 80.6435  |
| 94  | A | 2982.6001 | 5.5149  | 56.1245  | 97.6746  |
| 95  | A | 2988.4351 | 5.5549  | 114.0139 | 361.1671 |
| 96  | A | 3002.7130 | 5.5523  | 15.7484  | 54.1627  |
| 97  | A | 3008.1833 | 5.5695  | 104.3014 | 776.3529 |
| 98  | A | 3009.9537 | 5.5754  | 10.8094  | 43.3377  |
| 99  | A | 3015.4004 | 5.5919  | 60.5834  | 596.3288 |
| 100 | A | 3069.8500 | 6.0481  | 10.8690  | 164.6725 |
| 101 | A | 3072.5587 | 6.0651  | 3.5356   | 12.6442  |
| 102 | A | 3077.7586 | 6.0454  | 7.4741   | 58.3793  |
| 103 | A | 3078.8408 | 6.0602  | 40.4835  | 22.9532  |
| 104 | A | 3079.2623 | 6.0909  | 3.7811   | 159.7929 |
| 105 | A | 3081.0513 | 6.1003  | 3.8312   | 28.6494  |
| 106 | A | 3091.2591 | 6.1304  | 22.6535  | 137.9346 |
| 107 | A | 3100.8597 | 6.1766  | 11.1649  | 114.8048 |
| 108 | A | 3107.9273 | 6.2684  | 13.7343  | 29.9030  |
| 109 | A | 3114.9523 | 6.3014  | 9.3551   | 27.6967  |
| 110 | A | 3114.9988 | 6.2856  | 29.2401  | 51.5141  |
| 111 | A | 3123.4838 | 6.3164  | 21.8686  | 46.4560  |
| 112 | A | 3123.6287 | 6.3278  | 2.3278   | 1.4934   |
| 113 | A | 3133.2925 | 6.3511  | 27.5256  | 132.7649 |
| 114 | A | 3145.0524 | 6.3413  | 24.6790  | 58.6235  |
| 115 | A | 3147.9530 | 6.3739  | 1.5845   | 73.9558  |
| 116 | A | 3216.9310 | 6.6564  | 7.3795   | 131.1188 |
| 117 | A | 3217.0151 | 6.6502  | 9.5142   | 25.3464  |

-----  
pyNR2-nC3F7I\_d\_1\_dimam  
-----

| NM# | Symm | Wavenumber | Force Const | IR Intens | Raman Activ |
|-----|------|------------|-------------|-----------|-------------|
| 1   | A    | 1.3682     | 0.0000      | 0.8807    | 0.2084      |
| 2   | A    | 11.6577    | 0.0011      | 0.2237    | 0.6150      |
| 3   | A    | 16.7026    | 0.0017      | 0.2380    | 1.4703      |
| 4   | A    | 26.0651    | 0.0021      | 0.0417    | 4.2034      |
| 5   | A    | 43.5242    | 0.0073      | 0.2139    | 2.9815      |
| 6   | A    | 45.4001    | 0.0100      | 0.1181    | 2.1850      |
| 7   | A    | 79.3272    | 0.0503      | 0.5507    | 0.6496      |
| 8   | A    | 83.8211    | 0.0256      | 1.5440    | 4.1100      |
| 9   | A    | 114.7017   | 0.0454      | 2.9036    | 2.2738      |
| 10  | A    | 122.2005   | 0.0444      | 1.7173    | 0.9743      |
| 11  | A    | 156.4819   | 0.0476      | 2.9475    | 2.6561      |
| 12  | A    | 160.6543   | 0.1693      | 0.4131    | 2.0518      |
| 13  | A    | 187.8732   | 0.0279      | 0.3614    | 0.2119      |
| 14  | A    | 205.9015   | 0.0320      | 8.3734    | 6.4923      |
| 15  | A    | 220.1986   | 0.5092      | 1.3572    | 1.2030      |
| 16  | A    | 239.1653   | 0.6478      | 4.1812    | 46.0950     |
| 17  | A    | 258.1148   | 0.7598      | 3.4497    | 6.1306      |
| 18  | A    | 275.6307   | 0.8271      | 6.6164    | 5.5238      |
| 19  | A    | 295.5367   | 0.0954      | 0.0229    | 0.0065      |
| 20  | A    | 302.9663   | 1.0038      | 2.6148    | 0.8454      |
| 21  | A    | 316.8546   | 0.2394      | 72.1411   | 7.8608      |
| 22  | A    | 324.3634   | 1.1342      | 1.1406    | 2.6517      |
| 23  | A    | 347.5916   | 1.3091      | 0.0660    | 1.2438      |
| 24  | A    | 392.3050   | 0.2431      | 0.0110    | 0.1277      |
| 25  | A    | 395.4979   | 1.6556      | 0.5382    | 2.4144      |
| 26  | A    | 413.5831   | 0.2668      | 7.7522    | 2.4307      |
| 27  | A    | 460.7614   | 2.2093      | 2.6308    | 4.2524      |
| 28  | A    | 474.8916   | 0.4787      | 1.3108    | 2.6525      |
| 29  | A    | 527.8266   | 2.9340      | 8.9497    | 0.7016      |
| 30  | A    | 535.8802   | 0.5381      | 10.4416   | 1.6734      |
| 31  | A    | 563.5882   | 0.5457      | 2.7869    | 0.1607      |
| 32  | A    | 578.6860   | 3.5091      | 0.6349    | 9.2721      |
| 33  | A    | 614.2755   | 3.8601      | 5.9258    | 1.1612      |
| 34  | A    | 645.3377   | 4.2877      | 8.1390    | 11.3565     |
| 35  | A    | 684.0713   | 1.9062      | 0.3883    | 4.1350      |
| 36  | A    | 741.1293   | 5.4489      | 39.8624   | 14.8075     |
| 37  | A    | 743.5098   | 1.0358      | 2.9732    | 1.2334      |
| 38  | A    | 760.9622   | 1.7469      | 45.7582   | 18.1041     |
| 39  | A    | 818.2863   | 0.6955      | 75.7068   | 2.2641      |
| 40  | A    | 834.3692   | 0.5150      | 0.3362    | 0.3364      |
| 41  | A    | 873.8526   | 5.9635      | 189.1608  | 54.2279     |
| 42  | A    | 958.6965   | 1.1659      | 30.4791   | 2.3588      |
| 43  | A    | 963.4809   | 0.8620      | 11.5308   | 1.8827      |
| 44  | A    | 992.8389   | 0.8337      | 0.0224    | 0.1325      |
| 45  | A    | 1010.9261  | 4.4833      | 18.9224   | 34.3925     |
| 46  | A    | 1018.5213  | 8.3253      | 230.4672  | 34.3053     |
| 47  | A    | 1069.2394  | 1.0593      | 14.7294   | 0.7222      |
| 48  | A    | 1098.1566  | 1.4112      | 0.4877    | 4.4731      |
| 49  | A    | 1102.7306  | 9.4845      | 70.9274   | 10.0953     |
| 50  | A    | 1108.2091  | 9.5678      | 28.4191   | 0.8550      |
| 51  | A    | 1119.0834  | 0.9217      | 0.9612    | 2.7673      |
| 52  | A    | 1131.4964  | 1.2721      | 3.3824    | 0.0132      |
| 53  | A    | 1155.0397  | 10.2488     | 130.0620  | 8.2303      |
| 54  | A    | 1163.4288  | 1.1826      | 59.7291   | 14.7799     |
| 55  | A    | 1190.6332  | 8.6241      | 461.6735  | 8.0130      |
| 56  | A    | 1195.4055  | 1.5880      | 16.4885   | 7.4967      |
| 57  | A    | 1202.9176  | 10.4771     | 326.4980  | 3.5821      |
| 58  | A    | 1232.2878  | 2.7817      | 18.4236   | 3.0613      |
| 59  | A    | 1232.6148  | 8.4895      | 158.6303  | 18.3870     |
| 60  | A    | 1258.2818  | 1.1705      | 17.9244   | 9.1025      |
| 61  | A    | 1300.8043  | 7.6246      | 0.7084    | 9.2330      |
| 62  | A    | 1318.0134  | 12.7621     | 59.4761   | 13.6546     |
| 63  | A    | 1359.6071  | 3.3834      | 67.8678   | 31.3546     |
| 64  | A    | 1372.9509  | 1.4988      | 2.3141    | 2.1352      |
| 65  | A    | 1445.4058  | 1.6614      | 0.6023    | 5.0442      |
| 66  | A    | 1456.3800  | 2.1192      | 8.5891    | 3.1629      |
| 67  | A    | 1480.8266  | 1.5311      | 4.7939    | 26.9386     |
| 68  | A    | 1493.5614  | 1.3823      | 4.6688    | 1.0461      |
| 69  | A    | 1502.5874  | 1.4733      | 23.6504   | 14.0418     |

|    |   |           |         |          |          |
|----|---|-----------|---------|----------|----------|
| 70 | A | 1507.0595 | 1.4166  | 1.6422   | 4.7709   |
| 71 | A | 1527.9478 | 1.5092  | 24.2145  | 4.5349   |
| 72 | A | 1537.6511 | 2.6530  | 88.4173  | 4.6905   |
| 73 | A | 1595.3736 | 10.3215 | 37.1448  | 1.8896   |
| 74 | A | 1633.3165 | 8.1294  | 244.0571 | 52.7418  |
| 75 | A | 2994.2164 | 5.5529  | 35.4861  | 68.0001  |
| 76 | A | 2999.0672 | 5.5842  | 98.4322  | 340.7148 |
| 77 | A | 3097.2305 | 6.1171  | 4.1173   | 32.0701  |
| 78 | A | 3098.9276 | 6.1252  | 20.7280  | 80.8151  |
| 79 | A | 3129.1862 | 6.3696  | 4.7048   | 6.9595   |
| 80 | A | 3135.9081 | 6.3870  | 19.0186  | 78.9168  |
| 81 | A | 3146.7422 | 6.3488  | 30.3372  | 111.2210 |
| 82 | A | 3149.7753 | 6.3824  | 8.8801   | 143.6289 |
| 83 | A | 3219.0584 | 6.6655  | 2.1345   | 132.9725 |
| 84 | A | 3219.1665 | 6.6588  | 8.4423   | 9.0977   |

-----

pyNR2-nC3F7I\_d\_1\_dimpy

| NM# | Symm | Wavenumber | Force Const | IR Intens | Raman Activ |
|-----|------|------------|-------------|-----------|-------------|
| 1   | A    | 2.7636     | 0.0000      | 0.0298    | 3.7704      |
| 2   | A    | 12.6899    | 0.0012      | 0.1401    | 0.1181      |
| 3   | A    | 14.2336    | 0.0008      | 0.7797    | 1.3793      |
| 4   | A    | 20.3622    | 0.0019      | 0.3920    | 0.3476      |
| 5   | A    | 30.9961    | 0.0014      | 2.0419    | 0.7564      |
| 6   | A    | 61.1848    | 0.0114      | 0.9988    | 0.0906      |
| 7   | A    | 71.9030    | 0.0247      | 0.3286    | 0.1898      |
| 8   | A    | 74.4893    | 0.0274      | 7.4307    | 1.3213      |
| 9   | A    | 79.3589    | 0.0082      | 0.0020    | 1.2588      |
| 10  | A    | 91.0618    | 0.0530      | 0.8278    | 0.2352      |
| 11  | A    | 120.7539   | 0.1302      | 4.6570    | 1.3838      |
| 12  | A    | 153.5891   | 0.0498      | 0.0978    | 0.7118      |
| 13  | A    | 166.0448   | 0.0643      | 2.1644    | 5.8080      |
| 14  | A    | 180.8873   | 0.0226      | 0.0303    | 0.1287      |
| 15  | A    | 219.9993   | 0.5289      | 0.4630    | 4.4704      |
| 16  | A    | 234.0955   | 0.7249      | 11.9877   | 60.0721     |
| 17  | A    | 253.5598   | 0.1875      | 0.7634    | 1.3459      |
| 18  | A    | 258.7710   | 0.2264      | 3.6939    | 2.7803      |
| 19  | A    | 276.3152   | 0.3545      | 7.1471    | 5.5661      |
| 20  | A    | 278.6112   | 0.1777      | 4.8817    | 0.4090      |
| 21  | A    | 302.0816   | 0.9873      | 1.8777    | 1.0420      |
| 22  | A    | 324.6352   | 1.1342      | 0.8753    | 2.9720      |
| 23  | A    | 347.6964   | 1.3080      | 0.0967    | 1.4033      |
| 24  | A    | 394.1694   | 0.3199      | 8.7906    | 14.8310     |
| 25  | A    | 396.1921   | 1.3375      | 0.7488    | 0.6504      |
| 26  | A    | 411.9994   | 0.2826      | 0.0027    | 0.1372      |
| 27  | A    | 460.2530   | 2.2319      | 1.6505    | 4.8152      |
| 28  | A    | 484.9971   | 0.5093      | 3.5710    | 2.4442      |
| 29  | A    | 527.3931   | 2.9179      | 10.8802   | 0.8211      |
| 30  | A    | 540.0165   | 0.4457      | 16.9922   | 0.4585      |
| 31  | A    | 556.8832   | 0.6793      | 8.2900    | 1.2323      |
| 32  | A    | 577.3112   | 3.5024      | 0.9949    | 10.8715     |
| 33  | A    | 610.6942   | 3.8109      | 5.5388    | 1.2841      |
| 34  | A    | 644.0030   | 4.2792      | 7.7666    | 12.3337     |
| 35  | A    | 680.1679   | 1.8930      | 0.0146    | 3.6034      |
| 36  | A    | 740.3916   | 5.4764      | 41.2027   | 18.5349     |
| 37  | A    | 747.0728   | 1.0274      | 0.0782    | 0.1255      |
| 38  | A    | 770.0438   | 1.7621      | 8.3277    | 35.6491     |
| 39  | A    | 817.5446   | 0.7240      | 52.3026   | 0.8834      |
| 40  | A    | 828.9891   | 0.5019      | 0.0002    | 0.2149      |
| 41  | A    | 875.0831   | 6.0388      | 191.7632  | 56.9590     |
| 42  | A    | 964.1136   | 0.7190      | 0.2747    | 1.0847      |
| 43  | A    | 969.7947   | 1.6466      | 9.6190    | 32.3081     |
| 44  | A    | 989.1008   | 0.8120      | 0.0024    | 0.2647      |
| 45  | A    | 1015.4595  | 5.9530      | 228.1567  | 12.4409     |
| 46  | A    | 1019.9668  | 5.2399      | 90.7226   | 37.1794     |
| 47  | A    | 1080.0050  | 1.0476      | 23.1643   | 0.6618      |
| 48  | A    | 1088.5117  | 7.1995      | 96.2435   | 2.7930      |
| 49  | A    | 1092.7211  | 1.8254      | 21.6333   | 17.4614     |
| 50  | A    | 1099.6290  | 4.8274      | 16.1502   | 30.3968     |

|    |   |           |         |          |          |
|----|---|-----------|---------|----------|----------|
| 51 | A | 1137.8291 | 1.0821  | 0.4692   | 0.8588   |
| 52 | A | 1138.1854 | 1.0558  | 0.6848   | 0.9893   |
| 53 | A | 1139.6041 | 1.0122  | 4.0213   | 0.9950   |
| 54 | A | 1148.8076 | 10.1006 | 146.0990 | 12.4861  |
| 55 | A | 1183.7327 | 10.6799 | 522.5698 | 7.4925   |
| 56 | A | 1199.6324 | 10.9769 | 324.5576 | 3.2696   |
| 57 | A | 1202.4198 | 1.4513  | 9.1908   | 10.3113  |
| 58 | A | 1229.9535 | 9.7045  | 172.9319 | 24.8948  |
| 59 | A | 1253.5761 | 1.1722  | 59.3495  | 18.1147  |
| 60 | A | 1260.8577 | 2.9571  | 35.8354  | 0.2133   |
| 61 | A | 1318.5320 | 12.7355 | 73.9973  | 15.8506  |
| 62 | A | 1331.0211 | 5.6298  | 1.2300   | 8.2742   |
| 63 | A | 1377.7717 | 1.6039  | 13.2414  | 0.0014   |
| 64 | A | 1404.8469 | 3.2553  | 178.6244 | 29.1937  |
| 65 | A | 1449.5528 | 1.4766  | 0.1487   | 12.1102  |
| 66 | A | 1469.8867 | 2.7822  | 2.0015   | 0.3383   |
| 67 | A | 1486.6153 | 1.6031  | 22.1400  | 6.7105   |
| 68 | A | 1487.3620 | 1.3530  | 0.3157   | 7.4253   |
| 69 | A | 1496.2367 | 1.3780  | 17.4654  | 20.2473  |
| 70 | A | 1516.3597 | 1.4904  | 4.2981   | 0.5903   |
| 71 | A | 1529.4505 | 1.5934  | 21.3391  | 16.4255  |
| 72 | A | 1557.7710 | 3.1536  | 168.1690 | 2.1760   |
| 73 | A | 1580.7667 | 9.5110  | 33.7399  | 3.1453   |
| 74 | A | 1648.6642 | 8.1295  | 463.9063 | 63.5873  |
| 75 | A | 2998.5578 | 5.5095  | 77.6364  | 57.9517  |
| 76 | A | 3004.8703 | 5.5515  | 50.8119  | 345.5897 |
| 77 | A | 3048.8833 | 6.0238  | 2.6178   | 141.7774 |
| 78 | A | 3049.8767 | 6.0432  | 58.4766  | 43.4613  |
| 79 | A | 3128.7124 | 6.3281  | 1.9539   | 0.9920   |
| 80 | A | 3141.5874 | 6.3650  | 31.0430  | 196.0194 |
| 81 | A | 3155.8204 | 6.3877  | 15.1539  | 41.0167  |
| 82 | A | 3158.2464 | 6.4169  | 0.0710   | 59.0007  |
| 83 | A | 3217.7232 | 6.6619  | 8.1128   | 150.5647 |
| 84 | A | 3217.8414 | 6.6561  | 7.4191   | 43.1774  |

-----  
pyNR2-nC3F7I\_d\_2\_dimam

| NM# | Symm | Wavenumber | Force Const | IR Intens | Raman Activ |
|-----|------|------------|-------------|-----------|-------------|
| 1   | A    | 1.3743     | 0.0000      | 0.8806    | 0.2082      |
| 2   | A    | 11.6577    | 0.0011      | 0.2239    | 0.6148      |
| 3   | A    | 16.6985    | 0.0017      | 0.2380    | 1.4706      |
| 4   | A    | 26.0641    | 0.0021      | 0.0417    | 4.2052      |
| 5   | A    | 43.5246    | 0.0073      | 0.2139    | 2.9792      |
| 6   | A    | 45.3945    | 0.0100      | 0.1182    | 2.1849      |
| 7   | A    | 79.3288    | 0.0504      | 0.5503    | 0.6490      |
| 8   | A    | 83.8217    | 0.0256      | 1.5442    | 4.1104      |
| 9   | A    | 114.7183   | 0.0454      | 2.9090    | 2.2770      |
| 10  | A    | 122.1931   | 0.0444      | 1.7129    | 0.9722      |
| 11  | A    | 156.4841   | 0.0476      | 2.9479    | 2.6564      |
| 12  | A    | 160.6548   | 0.1691      | 0.4125    | 2.0510      |
| 13  | A    | 187.8797   | 0.0279      | 0.3608    | 0.2114      |
| 14  | A    | 205.9059   | 0.0320      | 8.3734    | 6.4933      |
| 15  | A    | 220.1980   | 0.5092      | 1.3574    | 1.2028      |
| 16  | A    | 239.1653   | 0.6478      | 4.1809    | 46.0940     |
| 17  | A    | 258.1153   | 0.7598      | 3.4496    | 6.1306      |
| 18  | A    | 275.6310   | 0.8271      | 6.6162    | 5.5233      |
| 19  | A    | 295.5393   | 0.0954      | 0.0228    | 0.0065      |
| 20  | A    | 302.9662   | 1.0038      | 2.6142    | 0.8453      |
| 21  | A    | 316.8538   | 0.2394      | 72.1410   | 7.8608      |
| 22  | A    | 324.3631   | 1.1342      | 1.1406    | 2.6516      |
| 23  | A    | 347.5914   | 1.3091      | 0.0660    | 1.2438      |
| 24  | A    | 392.3028   | 0.2431      | 0.0110    | 0.1277      |
| 25  | A    | 395.4986   | 1.6556      | 0.5381    | 2.4138      |
| 26  | A    | 413.5841   | 0.2668      | 7.7520    | 2.4306      |
| 27  | A    | 460.7610   | 2.2093      | 2.6305    | 4.2527      |
| 28  | A    | 474.8916   | 0.4787      | 1.3110    | 2.6527      |
| 29  | A    | 527.8268   | 2.9340      | 8.9486    | 0.7016      |
| 30  | A    | 535.8793   | 0.5381      | 10.4424   | 1.6733      |
| 31  | A    | 563.5875   | 0.5457      | 2.7867    | 0.1606      |

|    |   |           |         |          |          |
|----|---|-----------|---------|----------|----------|
| 32 | A | 578.6859  | 3.5091  | 0.6348   | 9.2715   |
| 33 | A | 614.2754  | 3.8601  | 5.9254   | 1.1612   |
| 34 | A | 645.3384  | 4.2877  | 8.1394   | 11.3566  |
| 35 | A | 684.0713  | 1.9062  | 0.3883   | 4.1350   |
| 36 | A | 741.1294  | 5.4489  | 39.8629  | 14.8079  |
| 37 | A | 743.5075  | 1.0357  | 2.9723   | 1.2332   |
| 38 | A | 760.9620  | 1.7469  | 45.7577  | 18.1041  |
| 39 | A | 818.2864  | 0.6955  | 75.7065  | 2.2641   |
| 40 | A | 834.3664  | 0.5150  | 0.3364   | 0.3364   |
| 41 | A | 873.8520  | 5.9635  | 189.1579 | 54.2287  |
| 42 | A | 958.6969  | 1.1659  | 30.4772  | 2.3586   |
| 43 | A | 963.4809  | 0.8620  | 11.5330  | 1.8829   |
| 44 | A | 992.8408  | 0.8337  | 0.0224   | 0.1325   |
| 45 | A | 1010.9261 | 4.4833  | 18.9214  | 34.3916  |
| 46 | A | 1018.5212 | 8.3253  | 230.4650 | 34.3059  |
| 47 | A | 1069.2402 | 1.0593  | 14.7292  | 0.7222   |
| 48 | A | 1098.1571 | 1.4112  | 0.4879   | 4.4730   |
| 49 | A | 1102.7303 | 9.4845  | 70.9540  | 10.0954  |
| 50 | A | 1108.2083 | 9.5677  | 28.4065  | 0.8543   |
| 51 | A | 1119.0842 | 0.9217  | 0.9613   | 2.7673   |
| 52 | A | 1131.4963 | 1.2721  | 3.3829   | 0.0132   |
| 53 | A | 1155.0424 | 10.2488 | 130.0590 | 8.2303   |
| 54 | A | 1163.4296 | 1.1826  | 59.7256  | 14.7795  |
| 55 | A | 1190.6338 | 8.6228  | 461.5853 | 8.0147   |
| 56 | A | 1195.4064 | 1.5880  | 16.5080  | 7.4955   |
| 57 | A | 1202.9173 | 10.4767 | 326.5669 | 3.5798   |
| 58 | A | 1232.2881 | 2.7821  | 18.4477  | 3.0644   |
| 59 | A | 1232.6145 | 8.4864  | 158.6006 | 18.3871  |
| 60 | A | 1258.2818 | 1.1705  | 17.9246  | 9.1025   |
| 61 | A | 1300.8043 | 7.6246  | 0.7083   | 9.2328   |
| 62 | A | 1318.0133 | 12.7621 | 59.4748  | 13.6544  |
| 63 | A | 1359.6071 | 3.3834  | 67.8668  | 31.3535  |
| 64 | A | 1372.9509 | 1.4988  | 2.3141   | 2.1351   |
| 65 | A | 1445.4064 | 1.6615  | 0.6024   | 5.0442   |
| 66 | A | 1456.3805 | 2.1192  | 8.5892   | 3.1629   |
| 67 | A | 1480.8276 | 1.5311  | 4.7939   | 26.9376  |
| 68 | A | 1493.5631 | 1.3823  | 4.6689   | 1.0461   |
| 69 | A | 1502.5888 | 1.4733  | 23.6516  | 14.0417  |
| 70 | A | 1507.0599 | 1.4166  | 1.6420   | 4.7709   |
| 71 | A | 1527.9483 | 1.5092  | 24.2123  | 4.5348   |
| 72 | A | 1537.6514 | 2.6529  | 88.4162  | 4.6904   |
| 73 | A | 1595.3738 | 10.3215 | 37.1446  | 1.8897   |
| 74 | A | 1633.3165 | 8.1294  | 244.0534 | 52.7410  |
| 75 | A | 2994.2153 | 5.5529  | 35.4938  | 68.0316  |
| 76 | A | 2999.0671 | 5.5842  | 98.4262  | 340.6888 |
| 77 | A | 3097.2312 | 6.1171  | 4.1192   | 32.0744  |
| 78 | A | 3098.9288 | 6.1252  | 20.7260  | 80.8123  |
| 79 | A | 3129.1870 | 6.3696  | 4.7051   | 6.9600   |
| 80 | A | 3135.9087 | 6.3870  | 19.0184  | 78.9155  |
| 81 | A | 3146.7420 | 6.3488  | 30.3373  | 111.2184 |
| 82 | A | 3149.7749 | 6.3824  | 8.8797   | 143.6298 |
| 83 | A | 3219.0584 | 6.6655  | 2.1352   | 132.9617 |
| 84 | A | 3219.1665 | 6.6588  | 8.4416   | 9.1083   |

-----  
pyNR2-nC3F7I\_d\_2\_dimpy

| NM# | Symm | Wavenumber | Force Const | IR Intens | Raman Activ |
|-----|------|------------|-------------|-----------|-------------|
| 1   | A    | 2.7350     | 0.0000      | 0.0309    | 3.7679      |
| 2   | A    | 12.6805    | 0.0012      | 0.1419    | 0.1233      |
| 3   | A    | 14.2593    | 0.0008      | 0.7666    | 1.3545      |
| 4   | A    | 20.3225    | 0.0019      | 0.3996    | 0.3585      |
| 5   | A    | 31.1000    | 0.0014      | 2.0512    | 0.7589      |
| 6   | A    | 61.2741    | 0.0115      | 1.0145    | 0.0907      |
| 7   | A    | 71.7811    | 0.0244      | 0.3114    | 0.1858      |
| 8   | A    | 74.5139    | 0.0274      | 7.4257    | 1.3263      |
| 9   | A    | 79.3818    | 0.0082      | 0.0020    | 1.2589      |
| 10  | A    | 90.9721    | 0.0529      | 0.8422    | 0.2411      |
| 11  | A    | 120.8575   | 0.1313      | 4.6485    | 1.3796      |
| 12  | A    | 153.5718   | 0.0496      | 0.0980    | 0.7137      |

|    |   |           |         |          |          |
|----|---|-----------|---------|----------|----------|
| 13 | A | 166.0168  | 0.0644  | 2.1615   | 5.8040   |
| 14 | A | 180.8375  | 0.0226  | 0.0311   | 0.1292   |
| 15 | A | 220.0021  | 0.5289  | 0.4639   | 4.4739   |
| 16 | A | 234.0948  | 0.7248  | 11.9876  | 60.0628  |
| 17 | A | 253.6089  | 0.1882  | 0.7668   | 1.3691   |
| 18 | A | 258.7288  | 0.2249  | 3.6612   | 2.7427   |
| 19 | A | 276.2558  | 0.3462  | 7.1835   | 5.5842   |
| 20 | A | 278.6595  | 0.1800  | 4.8809   | 0.4170   |
| 21 | A | 302.0800  | 0.9872  | 1.8760   | 1.0416   |
| 22 | A | 324.6369  | 1.1343  | 0.8738   | 2.9713   |
| 23 | A | 347.6971  | 1.3080  | 0.0965   | 1.4039   |
| 24 | A | 394.1746  | 0.3200  | 8.7824   | 14.8327  |
| 25 | A | 396.1908  | 1.3341  | 0.7542   | 0.6444   |
| 26 | A | 411.9597  | 0.2826  | 0.0027   | 0.1370   |
| 27 | A | 460.2499  | 2.2319  | 1.6510   | 4.8135   |
| 28 | A | 484.9944  | 0.5093  | 3.5682   | 2.4454   |
| 29 | A | 527.3918  | 2.9183  | 10.8698  | 0.8210   |
| 30 | A | 540.0175  | 0.4457  | 16.9953  | 0.4592   |
| 31 | A | 556.8837  | 0.6792  | 8.2870   | 1.2315   |
| 32 | A | 577.3116  | 3.5025  | 0.9956   | 10.8694  |
| 33 | A | 610.6979  | 3.8112  | 5.5485   | 1.2845   |
| 34 | A | 644.0029  | 4.2792  | 7.7694   | 12.3341  |
| 35 | A | 680.1680  | 1.8930  | 0.0145   | 3.6048   |
| 36 | A | 740.3908  | 5.4765  | 41.1971  | 18.5327  |
| 37 | A | 747.0718  | 1.0274  | 0.0784   | 0.1231   |
| 38 | A | 770.0452  | 1.7621  | 8.3322   | 35.6530  |
| 39 | A | 817.5459  | 0.7240  | 52.3036  | 0.8829   |
| 40 | A | 828.9825  | 0.5019  | 0.0001   | 0.2150   |
| 41 | A | 875.0846  | 6.0389  | 191.7225 | 56.9609  |
| 42 | A | 964.1137  | 0.7190  | 0.2740   | 1.0853   |
| 43 | A | 969.7936  | 1.6465  | 9.6259   | 32.3080  |
| 44 | A | 989.0910  | 0.8119  | 0.0024   | 0.2652   |
| 45 | A | 1015.4581 | 5.9540  | 228.2121 | 12.4467  |
| 46 | A | 1019.9670 | 5.2390  | 90.6450  | 37.1670  |
| 47 | A | 1080.0063 | 1.0476  | 23.1889  | 0.6610   |
| 48 | A | 1088.5074 | 7.2010  | 96.2485  | 2.7894   |
| 49 | A | 1092.7189 | 1.8256  | 21.6181  | 17.4516  |
| 50 | A | 1099.6299 | 4.8247  | 16.1461  | 30.3918  |
| 51 | A | 1137.8237 | 1.0763  | 0.4527   | 0.8937   |
| 52 | A | 1138.1749 | 1.0613  | 0.7105   | 0.9564   |
| 53 | A | 1139.6058 | 1.0122  | 4.0534   | 0.9995   |
| 54 | A | 1148.8146 | 10.1009 | 146.0766 | 12.4876  |
| 55 | A | 1183.7263 | 10.6797 | 522.8513 | 7.4787   |
| 56 | A | 1199.6246 | 10.9713 | 324.2724 | 3.2879   |
| 57 | A | 1202.4192 | 1.4514  | 9.2852   | 10.3040  |
| 58 | A | 1229.9563 | 9.7056  | 172.9676 | 24.8875  |
| 59 | A | 1253.5823 | 1.1722  | 59.3645  | 18.1238  |
| 60 | A | 1260.8528 | 2.9570  | 35.8181  | 0.2136   |
| 61 | A | 1318.5319 | 12.7354 | 73.9898  | 15.8512  |
| 62 | A | 1331.0174 | 5.6308  | 1.2308   | 8.2729   |
| 63 | A | 1377.7746 | 1.6039  | 13.2378  | 0.0014   |
| 64 | A | 1404.8455 | 3.2553  | 178.6108 | 29.1940  |
| 65 | A | 1449.5514 | 1.4765  | 0.1487   | 12.1113  |
| 66 | A | 1469.8873 | 2.7822  | 2.0021   | 0.3373   |
| 67 | A | 1486.6113 | 1.6030  | 22.1446  | 6.7092   |
| 68 | A | 1487.3634 | 1.3530  | 0.3180   | 7.4243   |
| 69 | A | 1496.2368 | 1.3780  | 17.4654  | 20.2470  |
| 70 | A | 1516.3506 | 1.4904  | 4.2974   | 0.5912   |
| 71 | A | 1529.4481 | 1.5934  | 21.3394  | 16.4216  |
| 72 | A | 1557.7691 | 3.1535  | 168.1625 | 2.1754   |
| 73 | A | 1580.7655 | 9.5112  | 33.7397  | 3.1468   |
| 74 | A | 1648.6639 | 8.1294  | 463.8791 | 63.5856  |
| 75 | A | 2998.5462 | 5.5095  | 77.6114  | 57.9859  |
| 76 | A | 3004.8580 | 5.5515  | 50.8437  | 345.5278 |
| 77 | A | 3048.9028 | 6.0237  | 2.6344   | 141.7252 |
| 78 | A | 3049.8965 | 6.0432  | 58.4498  | 43.5273  |
| 79 | A | 3128.7083 | 6.3281  | 1.9541   | 0.9923   |
| 80 | A | 3141.5819 | 6.3650  | 31.0449  | 196.0204 |
| 81 | A | 3155.8188 | 6.3877  | 15.1534  | 41.0325  |
| 82 | A | 3158.2444 | 6.4169  | 0.0715   | 58.9979  |
| 83 | A | 3217.7180 | 6.6621  | 8.1668   | 154.7226 |

84 A 3217.8284 6.6558 7.3662 39.0228

pyNR2-nC3F7I\_s\_1\_dimam

| NM# | Symm | Wavenumber | Force Const | IR Intens | Raman Activ |
|-----|------|------------|-------------|-----------|-------------|
| 1   | A    | 2.7282     | 0.0000      | 0.6118    | 0.1639      |
| 2   | A    | 15.9034    | 0.0015      | 0.4210    | 2.1832      |
| 3   | A    | 19.1611    | 0.0018      | 0.1598    | 0.5518      |
| 4   | A    | 29.6916    | 0.0031      | 0.0579    | 4.0527      |
| 5   | A    | 43.4548    | 0.0123      | 0.2783    | 3.0228      |
| 6   | A    | 44.2055    | 0.0070      | 0.0988    | 1.7713      |
| 7   | A    | 71.6602    | 0.0487      | 0.0617    | 0.0349      |
| 8   | A    | 82.3257    | 0.0212      | 2.5017    | 5.5637      |
| 9   | A    | 113.2517   | 0.1566      | 2.6880    | 0.9744      |
| 10  | A    | 120.1949   | 0.0263      | 0.0026    | 0.1747      |
| 11  | A    | 155.3379   | 0.0665      | 6.5784    | 10.8860     |
| 12  | A    | 159.1653   | 0.0903      | 1.7645    | 10.9943     |
| 13  | A    | 187.3870   | 0.0277      | 0.2002    | 0.1211      |
| 14  | A    | 206.1273   | 0.0319      | 8.0376    | 4.0034      |
| 15  | A    | 213.8536   | 0.4789      | 2.3256    | 0.2150      |
| 16  | A    | 231.1476   | 0.5912      | 0.1068    | 0.0020      |
| 17  | A    | 263.4759   | 0.8345      | 6.8861    | 50.4684     |
| 18  | A    | 264.7075   | 0.7928      | 0.0664    | 1.1876      |
| 19  | A    | 286.6374   | 0.8848      | 5.0008    | 1.1263      |
| 20  | A    | 295.5502   | 0.0956      | 0.0195    | 0.0056      |
| 21  | A    | 316.0909   | 0.2377      | 76.8534   | 8.7988      |
| 22  | A    | 336.8577   | 1.2326      | 0.3068    | 1.3783      |
| 23  | A    | 371.2928   | 1.5193      | 0.0655    | 0.9389      |
| 24  | A    | 379.5742   | 1.5369      | 0.3560    | 0.5591      |
| 25  | A    | 392.4737   | 0.2433      | 0.0080    | 0.1200      |
| 26  | A    | 413.6128   | 0.2668      | 8.0198    | 2.5316      |
| 27  | A    | 474.9315   | 0.4778      | 1.4778    | 2.5727      |
| 28  | A    | 506.5509   | 2.6859      | 1.2001    | 0.3160      |
| 29  | A    | 526.6217   | 2.9088      | 6.4656    | 2.8007      |
| 30  | A    | 536.0637   | 0.5393      | 10.5572   | 1.5649      |
| 31  | A    | 563.6481   | 0.5450      | 3.1295    | 0.3031      |
| 32  | A    | 580.6290   | 3.4095      | 7.9588    | 13.8413     |
| 33  | A    | 596.3070   | 3.7715      | 0.1058    | 2.1779      |
| 34  | A    | 666.3482   | 4.4182      | 47.4469   | 0.7231      |
| 35  | A    | 684.0640   | 1.9062      | 0.3867    | 4.1931      |
| 36  | A    | 725.4497   | 4.9257      | 107.8133  | 44.0862     |
| 37  | A    | 743.9085   | 1.0298      | 3.2262    | 1.3625      |
| 38  | A    | 761.0955   | 1.7414      | 45.7498   | 18.3077     |
| 39  | A    | 806.0231   | 5.0317      | 136.6891  | 50.4150     |
| 40  | A    | 819.0885   | 0.7082      | 46.2935   | 0.2068      |
| 41  | A    | 834.6746   | 0.5155      | 0.2821    | 0.3445      |
| 42  | A    | 958.9384   | 1.2051      | 32.4151   | 2.5227      |
| 43  | A    | 963.8614   | 0.8436      | 10.6709   | 1.8370      |
| 44  | A    | 992.9416   | 0.8337      | 0.0224    | 0.1430      |
| 45  | A    | 1010.8683  | 4.4772      | 23.7713   | 36.3660     |
| 46  | A    | 1052.9131  | 8.5485      | 41.7145   | 87.8981     |
| 47  | A    | 1069.3324  | 1.0590      | 14.6761   | 0.6922      |
| 48  | A    | 1098.1039  | 1.4113      | 0.4320    | 4.4679      |
| 49  | A    | 1114.4727  | 9.9357      | 256.7406  | 0.9761      |
| 50  | A    | 1116.1966  | 9.7251      | 52.8866   | 0.3517      |
| 51  | A    | 1119.0141  | 0.9217      | 0.8660    | 2.7765      |
| 52  | A    | 1131.5057  | 1.2722      | 3.4235    | 0.0136      |
| 53  | A    | 1163.2444  | 1.1801      | 42.5564   | 16.0289     |
| 54  | A    | 1168.9619  | 10.4545     | 84.5750   | 0.7445      |
| 55  | A    | 1184.7881  | 10.3145     | 278.5251  | 20.4443     |
| 56  | A    | 1195.4328  | 1.5245      | 24.7926   | 7.7984      |
| 57  | A    | 1208.1776  | 11.3139     | 416.6528  | 1.0494      |
| 58  | A    | 1232.5040  | 2.5939      | 20.1248   | 1.3727      |
| 59  | A    | 1247.2570  | 11.1433     | 81.0618   | 25.6813     |
| 60  | A    | 1258.2912  | 1.1711      | 17.3848   | 9.5729      |
| 61  | A    | 1299.4456  | 12.3686     | 228.3325  | 4.2974      |
| 62  | A    | 1300.9434  | 7.6134      | 0.7328    | 9.7123      |
| 63  | A    | 1360.0952  | 3.3867      | 67.6404   | 33.3675     |
| 64  | A    | 1372.9616  | 1.4992      | 2.3489    | 2.1778      |

|    |   |           |         |          |          |
|----|---|-----------|---------|----------|----------|
| 65 | A | 1445.3910 | 1.6580  | 0.5871   | 5.1155   |
| 66 | A | 1456.3912 | 2.1252  | 8.5215   | 3.3159   |
| 67 | A | 1480.7707 | 1.5312  | 4.8090   | 31.3361  |
| 68 | A | 1493.4050 | 1.3823  | 4.5452   | 0.9882   |
| 69 | A | 1502.4983 | 1.4729  | 24.1158  | 14.0591  |
| 70 | A | 1507.0165 | 1.4164  | 1.6286   | 4.7625   |
| 71 | A | 1527.9056 | 1.5094  | 24.5123  | 4.6551   |
| 72 | A | 1537.7326 | 2.6564  | 90.4782  | 5.4209   |
| 73 | A | 1595.1725 | 10.3123 | 37.3762  | 1.8948   |
| 74 | A | 1633.3835 | 8.1294  | 249.5709 | 55.4120  |
| 75 | A | 2993.7223 | 5.5517  | 35.5909  | 68.3433  |
| 76 | A | 2998.5750 | 5.5831  | 99.9611  | 338.0911 |
| 77 | A | 3097.2012 | 6.1161  | 3.9040   | 31.1596  |
| 78 | A | 3098.8832 | 6.1241  | 21.1342  | 83.4591  |
| 79 | A | 3129.1903 | 6.3696  | 4.7369   | 7.0006   |
| 80 | A | 3135.8780 | 6.3869  | 19.0910  | 78.2043  |
| 81 | A | 3146.6525 | 6.3484  | 30.6348  | 112.5237 |
| 82 | A | 3149.6770 | 6.3820  | 9.1040   | 144.9329 |
| 83 | A | 3219.0617 | 6.6655  | 2.1581   | 133.9532 |
| 84 | A | 3219.1675 | 6.6588  | 8.5750   | 8.9142   |

-----  
pyNR2-nC3F7I\_s\_1\_dimpy

| NM# | Symm | Wavenumber | Force Const | IR Intens | Raman Activ |
|-----|------|------------|-------------|-----------|-------------|
| 1   | A    | 3.8863     | 0.0000      | 0.0261    | 3.4959      |
| 2   | A    | 13.5242    | 0.0007      | 1.0715    | 1.8634      |
| 3   | A    | 14.0827    | 0.0012      | 0.2741    | 0.0807      |
| 4   | A    | 27.9250    | 0.0059      | 0.0000    | 0.0831      |
| 5   | A    | 30.3671    | 0.0013      | 2.3063    | 0.9093      |
| 6   | A    | 59.7809    | 0.0091      | 0.6062    | 0.0631      |
| 7   | A    | 65.9000    | 0.0331      | 0.0000    | 0.0539      |
| 8   | A    | 72.4283    | 0.0235      | 8.2975    | 1.2033      |
| 9   | A    | 79.3896    | 0.0082      | 0.0016    | 1.2757      |
| 10  | A    | 93.2497    | 0.0509      | 0.4167    | 0.0375      |
| 11  | A    | 116.1727   | 0.0827      | 1.5738    | 0.1854      |
| 12  | A    | 154.2212   | 0.1264      | 7.3784    | 16.7329     |
| 13  | A    | 162.8712   | 0.0397      | 4.1116    | 8.5784      |
| 14  | A    | 180.7702   | 0.0226      | 0.0280    | 0.1184      |
| 15  | A    | 214.6259   | 0.4788      | 1.9208    | 0.2798      |
| 16  | A    | 231.1893   | 0.5912      | 0.1000    | 0.0050      |
| 17  | A    | 253.9475   | 0.1437      | 0.0282    | 0.1163      |
| 18  | A    | 258.8723   | 0.7193      | 10.6441   | 54.9273     |
| 19  | A    | 267.2777   | 0.3636      | 0.2723    | 1.6415      |
| 20  | A    | 278.3083   | 0.1439      | 6.1880    | 3.5569      |
| 21  | A    | 286.1172   | 0.8405      | 4.3542    | 1.6303      |
| 22  | A    | 336.3870   | 1.2443      | 1.5471    | 1.7944      |
| 23  | A    | 371.0844   | 1.5174      | 0.0313    | 1.2717      |
| 24  | A    | 380.2249   | 1.5416      | 0.2193    | 0.4847      |
| 25  | A    | 394.2940   | 0.3051      | 9.5003    | 13.4513     |
| 26  | A    | 413.1999   | 0.2834      | 0.0037    | 0.1465      |
| 27  | A    | 484.8885   | 0.5097      | 3.7376    | 2.5225      |
| 28  | A    | 506.1260   | 2.6722      | 1.3114    | 0.2989      |
| 29  | A    | 526.1446   | 2.8912      | 7.4338    | 3.6368      |
| 30  | A    | 540.0379   | 0.4463      | 17.1073   | 0.5068      |
| 31  | A    | 556.8151   | 0.6784      | 8.1850    | 1.3224      |
| 32  | A    | 576.5567   | 3.3868      | 4.0985    | 17.0246     |
| 33  | A    | 595.6340   | 3.7667      | 0.0901    | 2.3458      |
| 34  | A    | 663.9800   | 4.3865      | 47.3734   | 1.0459      |
| 35  | A    | 680.2062   | 1.8930      | 0.0141    | 3.5835      |
| 36  | A    | 724.2335   | 4.9030      | 95.4069   | 47.7134     |
| 37  | A    | 747.2894   | 1.0259      | 0.2039    | 0.1924      |
| 38  | A    | 769.9805   | 1.7627      | 8.4975    | 38.0062     |
| 39  | A    | 806.3670   | 5.4618      | 104.9537  | 47.6062     |
| 40  | A    | 817.5884   | 0.7254      | 56.3297   | 1.0149      |
| 41  | A    | 829.0628   | 0.5021      | 0.0000    | 0.2157      |
| 42  | A    | 964.1446   | 0.7202      | 0.2584    | 1.0592      |
| 43  | A    | 969.8133   | 1.6451      | 9.4145    | 33.2061     |
| 44  | A    | 989.5231   | 0.8137      | 0.0001    | 0.2605      |
| 45  | A    | 1017.7572  | 4.2074      | 104.9649  | 4.7402      |



|    |   |           |         |          |          |
|----|---|-----------|---------|----------|----------|
| 46 | A | 1055.0309 | 8.4140  | 31.1881  | 111.1276 |
| 47 | A | 1079.9970 | 1.0473  | 22.8854  | 0.6566   |
| 48 | A | 1093.6145 | 1.4941  | 40.7200  | 37.5343  |
| 49 | A | 1096.8288 | 9.3221  | 65.8691  | 0.5741   |
| 50 | A | 1106.2165 | 8.9671  | 226.7168 | 0.5716   |
| 51 | A | 1137.7582 | 1.1172  | 0.1509   | 0.6311   |
| 52 | A | 1138.1323 | 1.0236  | 0.2199   | 1.1712   |
| 53 | A | 1139.6357 | 1.0124  | 3.5402   | 1.0025   |
| 54 | A | 1161.1297 | 10.2941 | 98.8488  | 0.6867   |
| 55 | A | 1178.8867 | 10.8001 | 322.4500 | 19.5466  |
| 56 | A | 1202.3694 | 1.4493  | 7.7958   | 10.8500  |
| 57 | A | 1205.2694 | 11.2459 | 402.9907 | 1.1069   |
| 58 | A | 1244.3401 | 6.0250  | 109.8651 | 34.2195  |
| 59 | A | 1253.9030 | 1.2714  | 68.0235  | 10.7221  |
| 60 | A | 1260.8217 | 2.9630  | 36.4534  | 0.2210   |
| 61 | A | 1301.3320 | 12.0178 | 239.7989 | 6.0554   |
| 62 | A | 1330.8934 | 5.6300  | 1.2701   | 8.1243   |
| 63 | A | 1377.7621 | 1.6036  | 13.2275  | 0.0015   |
| 64 | A | 1404.6742 | 3.2597  | 178.8543 | 32.6266  |
| 65 | A | 1449.5045 | 1.4773  | 0.1587   | 12.0681  |
| 66 | A | 1469.7182 | 2.7775  | 2.0166   | 0.3865   |
| 67 | A | 1486.5881 | 1.6030  | 22.1880  | 6.6980   |
| 68 | A | 1487.3608 | 1.3531  | 0.3348   | 7.4484   |
| 69 | A | 1496.2204 | 1.3782  | 17.4704  | 20.3506  |
| 70 | A | 1516.3216 | 1.4898  | 4.3163   | 0.6092   |
| 71 | A | 1529.4263 | 1.5938  | 21.5836  | 16.9813  |
| 72 | A | 1557.5916 | 3.1472  | 168.1468 | 2.1116   |
| 73 | A | 1580.8553 | 9.5224  | 34.0421  | 3.2218   |
| 74 | A | 1648.4814 | 8.1282  | 467.3664 | 65.3384  |
| 75 | A | 2998.2927 | 5.5094  | 77.7159  | 58.8387  |
| 76 | A | 3004.6112 | 5.5515  | 51.6677  | 345.4047 |
| 77 | A | 3048.8666 | 6.0226  | 2.7968   | 141.6151 |
| 78 | A | 3049.8611 | 6.0420  | 58.4163  | 44.4498  |
| 79 | A | 3128.5336 | 6.3274  | 1.9664   | 1.0015   |
| 80 | A | 3141.4061 | 6.3643  | 31.2911  | 196.8454 |
| 81 | A | 3155.7252 | 6.3872  | 15.3770  | 39.8897  |
| 82 | A | 3158.1481 | 6.4165  | 0.0709   | 58.8485  |
| 83 | A | 3217.5718 | 6.6616  | 8.4796   | 157.6800 |
| 84 | A | 3217.6786 | 6.6551  | 7.4514   | 37.7798  |

-----  
pyNR2-nC3F7I\_s\_2\_dimam

| NM# | Symm | Wavenumber | Force Const | IR Intens | Raman Activ |
|-----|------|------------|-------------|-----------|-------------|
| 1   | A    | 2.1881     | 0.0000      | 0.4313    | 0.2269      |
| 2   | A    | 16.7051    | 0.0019      | 0.4403    | 1.4399      |
| 3   | A    | 20.6354    | 0.0016      | 0.2283    | 1.6674      |
| 4   | A    | 28.6176    | 0.0041      | 0.1741    | 3.0448      |
| 5   | A    | 39.4914    | 0.0050      | 0.1976    | 4.0864      |
| 6   | A    | 45.7768    | 0.0122      | 0.0741    | 1.6158      |
| 7   | A    | 72.3086    | 0.0526      | 0.0666    | 0.0838      |
| 8   | A    | 84.1497    | 0.0233      | 3.4910    | 7.2749      |
| 9   | A    | 108.1020   | 0.0475      | 0.5742    | 0.4266      |
| 10  | A    | 125.4631   | 0.0395      | 0.1186    | 0.1654      |
| 11  | A    | 156.6813   | 0.0477      | 0.7347    | 2.4005      |
| 12  | A    | 158.8966   | 0.2048      | 9.4500    | 18.3163     |
| 13  | A    | 187.8592   | 0.0279      | 0.3358    | 0.1764      |
| 14  | A    | 206.6398   | 0.0318      | 8.4380    | 4.2935      |
| 15  | A    | 213.6855   | 0.4834      | 2.2678    | 0.2032      |
| 16  | A    | 231.3180   | 0.5922      | 0.0977    | 0.0045      |
| 17  | A    | 262.6076   | 0.8194      | 6.8488    | 50.8759     |
| 18  | A    | 264.3213   | 0.7988      | 0.5493    | 6.4223      |
| 19  | A    | 286.6873   | 0.8831      | 6.4761    | 0.9740      |
| 20  | A    | 295.7448   | 0.0954      | 0.0547    | 0.0128      |
| 21  | A    | 316.5321   | 0.2383      | 79.3821   | 8.3376      |
| 22  | A    | 336.9555   | 1.2260      | 0.2154    | 1.7585      |
| 23  | A    | 371.4111   | 1.5208      | 0.0737    | 1.1455      |
| 24  | A    | 379.5226   | 1.5379      | 0.3744    | 0.6425      |
| 25  | A    | 392.5428   | 0.2434      | 0.0080    | 0.1335      |
| 26  | A    | 413.8051   | 0.2664      | 8.3067    | 2.3936      |

|    |   |           |         |          |          |
|----|---|-----------|---------|----------|----------|
| 27 | A | 474.8760  | 0.4776  | 1.3585   | 2.5782   |
| 28 | A | 506.3961  | 2.6836  | 1.1602   | 0.2598   |
| 29 | A | 526.7100  | 2.9035  | 7.9416   | 3.0033   |
| 30 | A | 536.1330  | 0.5388  | 10.4359  | 1.4881   |
| 31 | A | 563.6088  | 0.5469  | 4.2217   | 0.2897   |
| 32 | A | 580.7621  | 3.3710  | 7.6143   | 15.2381  |
| 33 | A | 596.2363  | 3.7701  | 0.1563   | 2.0930   |
| 34 | A | 666.2596  | 4.4141  | 51.2427  | 0.9500   |
| 35 | A | 684.0366  | 1.9060  | 0.3912   | 4.2771   |
| 36 | A | 725.4362  | 4.9287  | 116.2776 | 42.2876  |
| 37 | A | 743.5654  | 1.0298  | 3.0589   | 1.4641   |
| 38 | A | 761.1655  | 1.7444  | 47.3823  | 17.9841  |
| 39 | A | 806.1048  | 5.0881  | 143.0684 | 45.3410  |
| 40 | A | 818.9569  | 0.7071  | 46.8438  | 0.2608   |
| 41 | A | 834.4851  | 0.5154  | 0.2380   | 0.3540   |
| 42 | A | 958.7864  | 1.2141  | 32.6363  | 2.4313   |
| 43 | A | 963.7303  | 0.8382  | 10.6593  | 1.7535   |
| 44 | A | 992.8100  | 0.8333  | 0.0271   | 0.1472   |
| 45 | A | 1010.8059 | 4.4771  | 24.1140  | 38.4974  |
| 46 | A | 1053.4183 | 8.5557  | 27.9921  | 94.3409  |
| 47 | A | 1069.2116 | 1.0597  | 14.5210  | 0.6914   |
| 48 | A | 1098.0257 | 1.4115  | 0.5103   | 4.4324   |
| 49 | A | 1113.6870 | 9.8975  | 229.6661 | 0.7923   |
| 50 | A | 1117.9851 | 9.5949  | 56.7260  | 0.4273   |
| 51 | A | 1119.0775 | 0.9232  | 0.8428   | 2.7609   |
| 52 | A | 1131.4288 | 1.2727  | 3.1340   | 0.0183   |
| 53 | A | 1163.4490 | 1.1829  | 49.0261  | 18.0890  |
| 54 | A | 1166.5737 | 10.0106 | 99.3802  | 0.7224   |
| 55 | A | 1184.2644 | 10.7529 | 300.0677 | 19.2191  |
| 56 | A | 1195.4441 | 1.5188  | 13.4028  | 8.6003   |
| 57 | A | 1209.7144 | 11.3329 | 412.5001 | 1.1176   |
| 58 | A | 1232.3006 | 2.5858  | 19.2972  | 1.4778   |
| 59 | A | 1247.3338 | 11.2123 | 56.9653  | 17.9525  |
| 60 | A | 1258.2298 | 1.1707  | 20.3632  | 9.6426   |
| 61 | A | 1299.5850 | 12.3839 | 242.3614 | 5.6635   |
| 62 | A | 1300.9142 | 7.6396  | 1.2575   | 10.0191  |
| 63 | A | 1360.1429 | 3.3832  | 71.1343  | 34.9827  |
| 64 | A | 1372.8894 | 1.4988  | 2.3518   | 2.2495   |
| 65 | A | 1445.3640 | 1.6593  | 0.5961   | 5.1306   |
| 66 | A | 1456.4019 | 2.1234  | 8.4635   | 3.2725   |
| 67 | A | 1480.8346 | 1.5313  | 4.9661   | 32.9952  |
| 68 | A | 1493.5836 | 1.3826  | 4.4496   | 1.0147   |
| 69 | A | 1502.7074 | 1.4747  | 25.3059  | 13.3359  |
| 70 | A | 1506.9580 | 1.4164  | 1.6036   | 4.8424   |
| 71 | A | 1527.9094 | 1.5115  | 25.2231  | 4.7242   |
| 72 | A | 1537.8227 | 2.6473  | 95.6372  | 6.2515   |
| 73 | A | 1595.0508 | 10.3063 | 37.6495  | 1.8467   |
| 74 | A | 1633.4016 | 8.1279  | 262.7793 | 56.8740  |
| 75 | A | 2993.8722 | 5.5523  | 35.6508  | 67.4043  |
| 76 | A | 2998.7437 | 5.5836  | 96.8811  | 331.5860 |
| 77 | A | 3097.3533 | 6.1168  | 4.2519   | 32.9850  |
| 78 | A | 3099.0982 | 6.1252  | 20.9018  | 77.1968  |
| 79 | A | 3129.4566 | 6.3707  | 4.7492   | 7.0108   |
| 80 | A | 3136.1677 | 6.3880  | 18.9426  | 75.7589  |
| 81 | A | 3146.5396 | 6.3480  | 30.8741  | 116.2854 |
| 82 | A | 3149.5707 | 6.3815  | 9.5465   | 148.0558 |
| 83 | A | 3219.0121 | 6.6650  | 2.4902   | 129.4678 |
| 84 | A | 3219.1275 | 6.6589  | 8.3504   | 13.5540  |

pyNR2-nC3F7I\_s\_2\_dimpy

| NM# | Symm | Wavenumber | Force Const | IR Intens | Raman Activ |
|-----|------|------------|-------------|-----------|-------------|
| 1   | A    | 3.8875     | 0.0000      | 0.0260    | 3.4959      |
| 2   | A    | 13.5219    | 0.0007      | 1.0723    | 1.8642      |
| 3   | A    | 14.0826    | 0.0012      | 0.2741    | 0.0807      |
| 4   | A    | 27.9257    | 0.0059      | 0.0000    | 0.0831      |
| 5   | A    | 30.3518    | 0.0013      | 2.3049    | 0.9085      |
| 6   | A    | 59.7799    | 0.0091      | 0.6056    | 0.0631      |
| 7   | A    | 65.9004    | 0.0331      | 0.0000    | 0.0539      |

|    |   |           |         |          |          |
|----|---|-----------|---------|----------|----------|
| 8  | A | 72.4297   | 0.0235  | 8.2981   | 1.2031   |
| 9  | A | 79.3892   | 0.0082  | 0.0016   | 1.2758   |
| 10 | A | 93.2513   | 0.0509  | 0.4167   | 0.0375   |
| 11 | A | 116.1726  | 0.0827  | 1.5738   | 0.1854   |
| 12 | A | 154.2213  | 0.1264  | 7.3787   | 16.7337  |
| 13 | A | 162.8720  | 0.0397  | 4.1111   | 8.5770   |
| 14 | A | 180.7749  | 0.0226  | 0.0280   | 0.1185   |
| 15 | A | 214.6255  | 0.4788  | 1.9208   | 0.2798   |
| 16 | A | 231.1892  | 0.5912  | 0.1000   | 0.0050   |
| 17 | A | 253.9457  | 0.1437  | 0.0282   | 0.1163   |
| 18 | A | 258.8725  | 0.7193  | 10.6447  | 54.9280  |
| 19 | A | 267.2774  | 0.3637  | 0.2723   | 1.6416   |
| 20 | A | 278.3092  | 0.1439  | 6.1872   | 3.5559   |
| 21 | A | 286.1173  | 0.8405  | 4.3540   | 1.6304   |
| 22 | A | 336.3871  | 1.2443  | 1.5471   | 1.7944   |
| 23 | A | 371.0843  | 1.5174  | 0.0313   | 1.2717   |
| 24 | A | 380.2249  | 1.5416  | 0.2193   | 0.4847   |
| 25 | A | 394.2928  | 0.3051  | 9.5006   | 13.4519  |
| 26 | A | 413.2001  | 0.2834  | 0.0037   | 0.1465   |
| 27 | A | 484.8891  | 0.5097  | 3.7376   | 2.5225   |
| 28 | A | 506.1260  | 2.6722  | 1.3114   | 0.2988   |
| 29 | A | 526.1446  | 2.8912  | 7.4337   | 3.6368   |
| 30 | A | 540.0381  | 0.4463  | 17.1068  | 0.5067   |
| 31 | A | 556.8149  | 0.6784  | 8.1855   | 1.3225   |
| 32 | A | 576.5568  | 3.3868  | 4.0985   | 17.0246  |
| 33 | A | 595.6342  | 3.7667  | 0.0901   | 2.3458   |
| 34 | A | 663.9800  | 4.3865  | 47.3736  | 1.0459   |
| 35 | A | 680.2061  | 1.8930  | 0.0141   | 3.5835   |
| 36 | A | 724.2338  | 4.9030  | 95.4069  | 47.7133  |
| 37 | A | 747.2895  | 1.0259  | 0.2038   | 0.1923   |
| 38 | A | 769.9807  | 1.7627  | 8.4970   | 38.0064  |
| 39 | A | 806.3669  | 5.4617  | 104.9536 | 47.6060  |
| 40 | A | 817.5882  | 0.7254  | 56.3301  | 1.0148   |
| 41 | A | 829.0626  | 0.5021  | 0.0000   | 0.2157   |
| 42 | A | 964.1445  | 0.7202  | 0.2582   | 1.0589   |
| 43 | A | 969.8135  | 1.6451  | 9.4136   | 33.2069  |
| 44 | A | 989.5230  | 0.8137  | 0.0001   | 0.2605   |
| 45 | A | 1017.7572 | 4.2074  | 104.9642 | 4.7400   |
| 46 | A | 1055.0312 | 8.4140  | 31.1887  | 111.1279 |
| 47 | A | 1079.9970 | 1.0473  | 22.8857  | 0.6567   |
| 48 | A | 1093.6145 | 1.4941  | 40.7199  | 37.5341  |
| 49 | A | 1096.8298 | 9.3221  | 65.8698  | 0.5741   |
| 50 | A | 1106.2167 | 8.9671  | 226.7136 | 0.5716   |
| 51 | A | 1137.7592 | 1.1173  | 0.1511   | 0.6304   |
| 52 | A | 1138.1335 | 1.0235  | 0.2196   | 1.1717   |
| 53 | A | 1139.6350 | 1.0124  | 3.5367   | 1.0020   |
| 54 | A | 1161.1317 | 10.2941 | 98.8479  | 0.6867   |
| 55 | A | 1178.8859 | 10.8001 | 322.4548 | 19.5455  |
| 56 | A | 1202.3696 | 1.4493  | 7.7961   | 10.8504  |
| 57 | A | 1205.2710 | 11.2459 | 402.9911 | 1.1069   |
| 58 | A | 1244.3395 | 6.0270  | 109.8477 | 34.2159  |
| 59 | A | 1253.9054 | 1.2713  | 68.0424  | 10.7256  |
| 60 | A | 1260.8223 | 2.9630  | 36.4542  | 0.2210   |
| 61 | A | 1301.3326 | 12.0177 | 239.7974 | 6.0553   |
| 62 | A | 1330.8942 | 5.6301  | 1.2699   | 8.1245   |
| 63 | A | 1377.7645 | 1.6036  | 13.2278  | 0.0015   |
| 64 | A | 1404.6751 | 3.2597  | 178.8530 | 32.6263  |
| 65 | A | 1449.5048 | 1.4773  | 0.1587   | 12.0681  |
| 66 | A | 1469.7191 | 2.7775  | 2.0167   | 0.3865   |
| 67 | A | 1486.5884 | 1.6030  | 22.1879  | 6.6981   |
| 68 | A | 1487.3606 | 1.3531  | 0.3344   | 7.4485   |
| 69 | A | 1496.2203 | 1.3782  | 17.4700  | 20.3505  |
| 70 | A | 1516.3222 | 1.4898  | 4.3165   | 0.6090   |
| 71 | A | 1529.4267 | 1.5938  | 21.5844  | 16.9815  |
| 72 | A | 1557.5923 | 3.1472  | 168.1500 | 2.1116   |
| 73 | A | 1580.8553 | 9.5223  | 34.0420  | 3.2218   |
| 74 | A | 1648.4817 | 8.1282  | 467.3660 | 65.3382  |
| 75 | A | 2998.2941 | 5.5094  | 77.7195  | 58.8324  |
| 76 | A | 3004.6127 | 5.5515  | 51.6622  | 345.4105 |
| 77 | A | 3048.8634 | 6.0226  | 2.7944   | 141.6242 |
| 78 | A | 3049.8578 | 6.0420  | 58.4205  | 44.4406  |

|    |   |           |        |         |          |
|----|---|-----------|--------|---------|----------|
| 79 | A | 3128.5343 | 6.3274 | 1.9664  | 1.0014   |
| 80 | A | 3141.4071 | 6.3643 | 31.2910 | 196.8459 |
| 81 | A | 3155.7252 | 6.3872 | 15.3770 | 39.8899  |
| 82 | A | 3158.1480 | 6.4165 | 0.0709  | 58.8484  |
| 83 | A | 3217.5714 | 6.6616 | 8.4796  | 157.6815 |
| 84 | A | 3217.6781 | 6.6551 | 7.4513  | 37.7783  |

pyNR2-nC3F7I\_s\_trml

| NM# | Symm | Wavenumber | Force Const | IR Intens | Raman Activ |
|-----|------|------------|-------------|-----------|-------------|
| 1   | A    | 0.7007     | 0.0000      | 0.0167    | 0.0378      |
| 2   | A    | 1.6093     | 0.0000      | 0.0132    | 0.0089      |
| 3   | A    | 5.2860     | 0.0003      | 0.1175    | 0.8846      |
| 4   | A    | 12.7220    | 0.0013      | 0.0958    | 0.0042      |
| 5   | A    | 15.3092    | 0.0025      | 0.1064    | 0.4142      |
| 6   | A    | 18.8403    | 0.0017      | 0.2250    | 0.4921      |
| 7   | A    | 25.7485    | 0.0120      | 0.3670    | 0.3404      |
| 8   | A    | 27.2457    | 0.0057      | 0.0108    | 0.1522      |
| 9   | A    | 30.9517    | 0.0044      | 0.0160    | 2.4582      |
| 10  | A    | 47.4324    | 0.0069      | 0.1139    | 2.5850      |
| 11  | A    | 59.2101    | 0.0196      | 0.3994    | 0.3538      |
| 12  | A    | 65.2814    | 0.0311      | 0.0015    | 0.0298      |
| 13  | A    | 71.6743    | 0.0500      | 0.0425    | 0.0263      |
| 14  | A    | 72.4712    | 0.0224      | 7.4158    | 2.5577      |
| 15  | A    | 81.6862    | 0.0207      | 1.7020    | 11.3492     |
| 16  | A    | 89.7537    | 0.0497      | 0.2444    | 0.0830      |
| 17  | A    | 112.0561   | 0.1452      | 0.2931    | 0.4727      |
| 18  | A    | 117.6253   | 0.0243      | 0.0211    | 0.0473      |
| 19  | A    | 117.7527   | 0.1262      | 2.9569    | 1.0702      |
| 20  | A    | 155.9801   | 0.2917      | 14.1338   | 25.0139     |
| 21  | A    | 158.7643   | 0.2968      | 4.6132    | 17.7031     |
| 22  | A    | 170.7806   | 0.0490      | 5.0239    | 6.2475      |
| 23  | A    | 181.2475   | 0.0252      | 0.1770    | 0.0741      |
| 24  | A    | 197.7273   | 0.0315      | 12.4749   | 7.1208      |
| 25  | A    | 213.5627   | 0.4825      | 2.6485    | 0.1997      |
| 26  | A    | 214.6505   | 0.4715      | 1.6517    | 0.3235      |
| 27  | A    | 231.2272   | 0.5916      | 0.1054    | 0.0042      |
| 28  | A    | 231.3158   | 0.5920      | 0.0895    | 0.0044      |
| 29  | A    | 260.4631   | 0.8271      | 14.7759   | 61.1420     |
| 30  | A    | 263.9953   | 0.6526      | 0.2893    | 1.1991      |
| 31  | A    | 264.0705   | 0.8431      | 3.8840    | 59.9140     |
| 32  | A    | 264.9041   | 0.7755      | 0.0254    | 1.7029      |
| 33  | A    | 286.1522   | 0.8729      | 9.8940    | 1.4839      |
| 34  | A    | 286.8774   | 0.8815      | 5.2354    | 1.1366      |
| 35  | A    | 296.8836   | 0.1051      | 0.0002    | 0.0658      |
| 36  | A    | 308.6856   | 0.2356      | 85.0578   | 11.9944     |
| 37  | A    | 336.5489   | 1.2419      | 0.8552    | 2.1249      |
| 38  | A    | 337.0040   | 1.2378      | 0.2994    | 1.7842      |
| 39  | A    | 371.1838   | 1.5186      | 0.0242    | 1.1982      |
| 40  | A    | 371.5085   | 1.5219      | 0.0594    | 1.1137      |
| 41  | A    | 379.5245   | 1.5376      | 0.3881    | 0.5448      |
| 42  | A    | 380.2151   | 1.5389      | 0.2287    | 0.5093      |
| 43  | A    | 401.5456   | 0.2603      | 0.0057    | 0.1043      |
| 44  | A    | 417.8087   | 0.2722      | 5.5309    | 6.8220      |
| 45  | A    | 478.1151   | 0.4863      | 2.1340    | 2.0557      |
| 46  | A    | 506.2623   | 2.6855      | 1.2133    | 0.2721      |
| 47  | A    | 506.6638   | 2.6869      | 1.2204    | 0.2401      |
| 48  | A    | 526.3128   | 2.9140      | 7.4336    | 3.5541      |
| 49  | A    | 526.8418   | 2.9167      | 8.3193    | 3.2688      |
| 50  | A    | 538.6478   | 0.5199      | 16.8850   | 2.7239      |
| 51  | A    | 563.0265   | 0.5813      | 0.7236    | 1.0411      |
| 52  | A    | 577.5409   | 3.3780      | 4.4723    | 17.5771     |
| 53  | A    | 581.8747   | 3.4022      | 9.1835    | 13.9078     |
| 54  | A    | 595.7936   | 3.7680      | 0.1006    | 2.2783      |
| 55  | A    | 596.4486   | 3.7723      | 0.1762    | 2.0333      |
| 56  | A    | 664.5190   | 4.3927      | 55.3823   | 0.8963      |
| 57  | A    | 666.9048   | 4.4169      | 51.3068   | 1.1736      |
| 58  | A    | 681.8328   | 1.8929      | 0.0356    | 3.6287      |
| 59  | A    | 724.6217   | 4.8900      | 150.9749  | 35.5807     |

|     |   |           |         |          |          |
|-----|---|-----------|---------|----------|----------|
| 60  | A | 725.8996  | 4.9341  | 88.2879  | 53.4373  |
| 61  | A | 744.4214  | 1.0586  | 2.2557   | 1.1563   |
| 62  | A | 766.5505  | 1.7852  | 54.8180  | 34.7270  |
| 63  | A | 806.1664  | 5.2367  | 214.3920 | 35.1649  |
| 64  | A | 807.0705  | 5.4477  | 58.2112  | 54.3645  |
| 65  | A | 822.1056  | 0.7087  | 51.5172  | 0.5920   |
| 66  | A | 835.4231  | 0.5152  | 0.2030   | 0.2560   |
| 67  | A | 960.4589  | 1.4675  | 35.7694  | 12.5482  |
| 68  | A | 967.3129  | 0.7594  | 3.1610   | 2.3916   |
| 69  | A | 992.1402  | 0.8239  | 0.0423   | 0.1585   |
| 70  | A | 1020.0930 | 4.3161  | 77.7020  | 18.4372  |
| 71  | A | 1053.1197 | 8.5516  | 16.6059  | 78.1452  |
| 72  | A | 1055.3689 | 8.4550  | 33.7154  | 129.5699 |
| 73  | A | 1071.4287 | 1.0644  | 15.1055  | 0.4703   |
| 74  | A | 1098.1027 | 1.5005  | 43.8243  | 30.5912  |
| 75  | A | 1101.2495 | 9.3994  | 61.4224  | 0.5758   |
| 76  | A | 1107.8428 | 8.5841  | 215.6058 | 0.4058   |
| 77  | A | 1116.2066 | 9.9387  | 238.2020 | 0.4769   |
| 78  | A | 1120.3639 | 0.9198  | 1.0561   | 2.7372   |
| 79  | A | 1124.2441 | 9.8600  | 46.1428  | 0.4130   |
| 80  | A | 1138.8414 | 1.2799  | 0.3192   | 0.0058   |
| 81  | A | 1159.9552 | 1.1483  | 81.9495  | 37.9255  |
| 82  | A | 1162.2641 | 10.3197 | 95.9312  | 0.6620   |
| 83  | A | 1168.1595 | 10.4394 | 95.2121  | 0.6682   |
| 84  | A | 1180.1583 | 10.8050 | 311.8565 | 19.7212  |
| 85  | A | 1186.0050 | 10.8365 | 303.2239 | 18.4197  |
| 86  | A | 1198.1305 | 1.5019  | 20.5890  | 16.1073  |
| 87  | A | 1206.3303 | 11.2674 | 376.7484 | 1.0445   |
| 88  | A | 1211.3573 | 11.3692 | 442.5584 | 1.1675   |
| 89  | A | 1237.1253 | 2.4832  | 19.9651  | 0.4700   |
| 90  | A | 1245.1628 | 7.6404  | 73.2666  | 31.0981  |
| 91  | A | 1248.0932 | 11.2994 | 64.4279  | 11.5865  |
| 92  | A | 1256.6668 | 1.2226  | 58.6379  | 15.1835  |
| 93  | A | 1298.9902 | 12.3219 | 331.2438 | 7.2826   |
| 94  | A | 1301.2875 | 12.0943 | 170.9286 | 8.0043   |
| 95  | A | 1312.5582 | 7.9063  | 0.5100   | 5.1788   |
| 96  | A | 1372.4340 | 3.3747  | 123.4712 | 80.8416  |
| 97  | A | 1373.4227 | 1.5023  | 5.5452   | 0.8813   |
| 98  | A | 1448.4414 | 1.5044  | 0.0148   | 6.1058   |
| 99  | A | 1463.8303 | 2.5530  | 11.0005  | 2.2636   |
| 100 | A | 1482.3952 | 1.5394  | 7.9688   | 31.6674  |
| 101 | A | 1494.0101 | 1.3840  | 4.2678   | 1.5698   |
| 102 | A | 1503.4130 | 1.4570  | 24.7652  | 15.7425  |
| 103 | A | 1507.5750 | 1.4321  | 1.5192   | 3.5177   |
| 104 | A | 1528.1218 | 1.5173  | 38.6960  | 11.8432  |
| 105 | A | 1544.8770 | 2.8154  | 119.4723 | 9.5921   |
| 106 | A | 1591.7745 | 10.1454 | 27.8718  | 3.0090   |
| 107 | A | 1642.6754 | 8.1239  | 379.2846 | 99.5819  |
| 108 | A | 2998.5512 | 5.5643  | 34.5937  | 68.0260  |
| 109 | A | 3003.2403 | 5.5958  | 87.2357  | 337.7162 |
| 110 | A | 3097.9441 | 6.1287  | 3.7200   | 36.2046  |
| 111 | A | 3099.0929 | 6.1380  | 21.5608  | 66.3868  |
| 112 | A | 3131.5636 | 6.3770  | 3.2303   | 4.0139   |
| 113 | A | 3139.1399 | 6.3950  | 19.2692  | 108.7405 |
| 114 | A | 3159.5795 | 6.4046  | 12.6803  | 42.9624  |
| 115 | A | 3162.0685 | 6.4353  | 0.1897   | 60.7809  |
| 116 | A | 3225.1057 | 6.6923  | 6.2896   | 133.7559 |
| 117 | A | 3225.2833 | 6.6857  | 4.2240   | 26.6438  |

pyNR2-nC3F7I\_s\_trm2

| NM# | Symm | Wavenumber | Force Const | IR Intens | Raman Activ |
|-----|------|------------|-------------|-----------|-------------|
| 1   | A    | 1.2411     | 0.0000      | 0.0028    | 0.0101      |
| 2   | A    | 1.7975     | 0.0000      | 0.1103    | 0.0475      |
| 3   | A    | 4.8044     | 0.0002      | 0.0801    | 0.8338      |
| 4   | A    | 12.8456    | 0.0013      | 0.0931    | 0.0075      |
| 5   | A    | 14.2979    | 0.0021      | 0.0477    | 0.2162      |
| 6   | A    | 18.5153    | 0.0016      | 0.2227    | 0.5308      |
| 7   | A    | 27.3325    | 0.0058      | 0.0124    | 0.1689      |

|    |   |           |        |          |          |
|----|---|-----------|--------|----------|----------|
| 8  | A | 27.9220   | 0.0149 | 0.2395   | 0.2185   |
| 9  | A | 30.5566   | 0.0044 | 0.0200   | 2.4348   |
| 10 | A | 47.7803   | 0.0071 | 0.1194   | 2.5101   |
| 11 | A | 60.4024   | 0.0209 | 0.5713   | 0.4366   |
| 12 | A | 65.2854   | 0.0311 | 0.0015   | 0.0319   |
| 13 | A | 71.6294   | 0.0498 | 0.0429   | 0.0157   |
| 14 | A | 73.2309   | 0.0235 | 7.1628   | 2.2545   |
| 15 | A | 79.6275   | 0.0187 | 1.0305   | 9.1080   |
| 16 | A | 89.7828   | 0.0496 | 0.2424   | 0.0794   |
| 17 | A | 111.9579  | 0.1539 | 3.1324   | 0.8327   |
| 18 | A | 116.9927  | 0.0239 | 0.0028   | 0.0444   |
| 19 | A | 117.9391  | 0.1266 | 1.8681   | 1.1368   |
| 20 | A | 155.7354  | 0.2856 | 14.7728  | 22.2372  |
| 21 | A | 158.3604  | 0.3544 | 3.1857   | 23.1322  |
| 22 | A | 170.7057  | 0.0471 | 2.5155   | 3.3915   |
| 23 | A | 181.7891  | 0.0254 | 0.1698   | 0.0888   |
| 24 | A | 197.7642  | 0.0318 | 11.6840  | 6.0742   |
| 25 | A | 213.6289  | 0.4823 | 2.6343   | 0.1970   |
| 26 | A | 214.6485  | 0.4708 | 1.6316   | 0.3182   |
| 27 | A | 231.1590  | 0.5913 | 0.1071   | 0.0017   |
| 28 | A | 231.2183  | 0.5915 | 0.0997   | 0.0042   |
| 29 | A | 260.5395  | 0.8333 | 14.5267  | 61.7029  |
| 30 | A | 264.0022  | 0.6489 | 0.2753   | 1.4711   |
| 31 | A | 264.8636  | 0.8567 | 4.0869   | 51.0948  |
| 32 | A | 265.0877  | 0.7808 | 0.0191   | 1.2529   |
| 33 | A | 286.1550  | 0.8740 | 7.6956   | 2.0794   |
| 34 | A | 286.8055  | 0.8849 | 4.2422   | 0.9043   |
| 35 | A | 296.8229  | 0.1049 | 0.0003   | 0.0664   |
| 36 | A | 308.3990  | 0.2346 | 80.5608  | 13.0223  |
| 37 | A | 336.5400  | 1.2416 | 0.9326   | 1.9559   |
| 38 | A | 336.9555  | 1.2425 | 0.2928   | 1.2052   |
| 39 | A | 371.1800  | 1.5186 | 0.0249   | 1.2184   |
| 40 | A | 371.4047  | 1.5205 | 0.0667   | 1.0300   |
| 41 | A | 379.4810  | 1.5370 | 0.3821   | 0.5657   |
| 42 | A | 380.2251  | 1.5390 | 0.2316   | 0.4877   |
| 43 | A | 401.6651  | 0.2602 | 0.0059   | 0.0946   |
| 44 | A | 417.5938  | 0.2724 | 5.9419   | 6.6083   |
| 45 | A | 478.1903  | 0.4865 | 2.1612   | 2.0165   |
| 46 | A | 506.2613  | 2.6853 | 1.2221   | 0.3018   |
| 47 | A | 506.7282  | 2.6878 | 1.2669   | 0.3042   |
| 48 | A | 526.3107  | 2.9140 | 6.8867   | 3.8910   |
| 49 | A | 526.7810  | 2.9191 | 6.4990   | 2.2640   |
| 50 | A | 538.6583  | 0.5204 | 16.4430  | 2.8753   |
| 51 | A | 563.0010  | 0.5799 | 0.2688   | 0.9309   |
| 52 | A | 577.5362  | 3.3771 | 4.5953   | 17.1301  |
| 53 | A | 581.8683  | 3.4415 | 10.0811  | 12.2676  |
| 54 | A | 595.7905  | 3.7679 | 0.1018   | 2.2706   |
| 55 | A | 596.4938  | 3.7729 | 0.1126   | 2.2186   |
| 56 | A | 664.5140  | 4.3927 | 51.2506  | 0.9169   |
| 57 | A | 667.0666  | 4.4239 | 47.6206  | 0.7488   |
| 58 | A | 681.8618  | 1.8931 | 0.0345   | 3.5501   |
| 59 | A | 724.6426  | 4.8961 | 115.9227 | 38.6236  |
| 60 | A | 725.8879  | 4.9281 | 103.8826 | 51.1000  |
| 61 | A | 744.7751  | 1.0584 | 2.5084   | 1.0623   |
| 62 | A | 766.5126  | 1.7824 | 51.2561  | 34.0864  |
| 63 | A | 806.2421  | 5.2276 | 154.4249 | 41.0838  |
| 64 | A | 807.0298  | 5.4558 | 99.2743  | 51.8897  |
| 65 | A | 822.1516  | 0.7086 | 53.5870  | 0.4950   |
| 66 | A | 835.5327  | 0.5152 | 0.2710   | 0.2251   |
| 67 | A | 960.6686  | 1.4664 | 35.7683  | 12.8948  |
| 68 | A | 967.5615  | 0.7607 | 2.9801   | 2.4468   |
| 69 | A | 992.8894  | 0.8257 | 0.0377   | 0.1427   |
| 70 | A | 1020.1795 | 4.3171 | 78.4827  | 16.7414  |
| 71 | A | 1052.6505 | 8.5483 | 49.9954  | 71.5328  |
| 72 | A | 1055.3749 | 8.4534 | 28.2581  | 120.8954 |
| 73 | A | 1071.6076 | 1.0639 | 15.2881  | 0.4667   |
| 74 | A | 1098.2004 | 1.5001 | 44.2104  | 29.4518  |
| 75 | A | 1101.2569 | 9.4000 | 61.1580  | 0.5787   |
| 76 | A | 1107.7995 | 8.5763 | 228.2422 | 0.4169   |
| 77 | A | 1116.9138 | 9.9908 | 270.5712 | 0.8479   |
| 78 | A | 1120.5164 | 0.9225 | 0.5429   | 2.7590   |

|     |   |           |         |          |          |
|-----|---|-----------|---------|----------|----------|
| 79  | A | 1122.2129 | 9.5565  | 48.9568  | 0.3510   |
| 80  | A | 1138.9485 | 1.2789  | 0.6023   | 0.0044   |
| 81  | A | 1159.8021 | 1.1498  | 66.2129  | 35.0502  |
| 82  | A | 1162.2206 | 10.3183 | 95.1307  | 0.6676   |
| 83  | A | 1170.5811 | 10.4836 | 82.0845  | 0.8120   |
| 84  | A | 1180.0987 | 10.8116 | 315.3902 | 20.1688  |
| 85  | A | 1186.8719 | 10.4536 | 269.0625 | 16.1537  |
| 86  | A | 1198.1149 | 1.5074  | 36.1733  | 15.5310  |
| 87  | A | 1206.3339 | 11.2672 | 347.9350 | 1.1344   |
| 88  | A | 1209.4428 | 11.3415 | 476.6478 | 1.0389   |
| 89  | A | 1237.3770 | 2.4921  | 19.8980  | 0.4451   |
| 90  | A | 1245.1471 | 7.6604  | 93.6805  | 29.2833  |
| 91  | A | 1248.0569 | 11.2064 | 84.7977  | 19.8380  |
| 92  | A | 1256.7317 | 1.2228  | 49.0777  | 14.8279  |
| 93  | A | 1298.9457 | 12.2750 | 243.7432 | 5.7530   |
| 94  | A | 1301.2607 | 12.0913 | 224.3348 | 7.0120   |
| 95  | A | 1312.6194 | 7.8905  | 0.4639   | 4.8071   |
| 96  | A | 1372.3155 | 3.3805  | 117.5301 | 77.2855  |
| 97  | A | 1373.5176 | 1.5028  | 5.5478   | 0.8569   |
| 98  | A | 1448.5016 | 1.5045  | 0.0150   | 6.2160   |
| 99  | A | 1463.8515 | 2.5542  | 10.9890  | 2.2882   |
| 100 | A | 1482.4520 | 1.5396  | 7.4170   | 29.2253  |
| 101 | A | 1494.1344 | 1.3840  | 4.4096   | 1.5824   |
| 102 | A | 1503.3480 | 1.4561  | 23.6692  | 16.3431  |
| 103 | A | 1507.8026 | 1.4324  | 1.5977   | 3.4482   |
| 104 | A | 1528.2311 | 1.5171  | 36.7994  | 11.6558  |
| 105 | A | 1544.8206 | 2.8156  | 112.1373 | 7.8809   |
| 106 | A | 1591.9615 | 10.1530 | 27.5489  | 3.0392   |
| 107 | A | 1642.6820 | 8.1250  | 359.6369 | 97.2528  |
| 108 | A | 2998.4175 | 5.5637  | 34.9138  | 70.1386  |
| 109 | A | 3003.1200 | 5.5953  | 90.2537  | 346.3842 |
| 110 | A | 3097.5423 | 6.1272  | 3.8637   | 36.4394  |
| 111 | A | 3098.6894 | 6.1366  | 21.2539  | 71.3114  |
| 112 | A | 3131.1964 | 6.3753  | 3.1979   | 4.0093   |
| 113 | A | 3138.7981 | 6.3935  | 19.5092  | 112.9615 |
| 114 | A | 3159.6889 | 6.4051  | 12.5385  | 41.0546  |
| 115 | A | 3162.1790 | 6.4357  | 0.2294   | 59.7828  |
| 116 | A | 3225.1085 | 6.6924  | 6.1302   | 133.2809 |
| 117 | A | 3225.2873 | 6.6857  | 4.1992   | 27.2426  |

-----  
pyNR2-nC3H7I\_d\_1\_dimam

| NM# | Symm | Wavenumber | Force Const | IR Intens | Raman Activ |
|-----|------|------------|-------------|-----------|-------------|
| 1   | A    | 6.4459     | 0.0001      | 0.3174    | 0.4497      |
| 2   | A    | 13.7113    | 0.0005      | 0.9899    | 3.2283      |
| 3   | A    | 31.5693    | 0.0018      | 0.6310    | 5.2821      |
| 4   | A    | 32.9502    | 0.0049      | 0.5715    | 1.2790      |
| 5   | A    | 49.8275    | 0.0057      | 1.0009    | 1.1261      |
| 6   | A    | 69.5599    | 0.0158      | 0.1491    | 5.5424      |
| 7   | A    | 101.8815   | 0.0162      | 0.0286    | 0.2022      |
| 8   | A    | 126.2774   | 0.0214      | 0.4818    | 0.7186      |
| 9   | A    | 139.6832   | 0.0397      | 5.1601    | 4.9579      |
| 10  | A    | 163.8048   | 0.0190      | 9.1836    | 5.8847      |
| 11  | A    | 172.1055   | 0.0224      | 0.3866    | 0.1889      |
| 12  | A    | 196.8176   | 0.0371      | 0.4573    | 2.4283      |
| 13  | A    | 270.5145   | 0.0645      | 0.0772    | 5.9357      |
| 14  | A    | 280.9811   | 0.1744      | 35.5151   | 9.8588      |
| 15  | A    | 282.7186   | 0.0966      | 0.3095    | 0.0695      |
| 16  | A    | 387.3400   | 0.2042      | 0.6860    | 14.3691     |
| 17  | A    | 398.7886   | 0.2554      | 0.0232    | 0.1494      |
| 18  | A    | 404.0549   | 0.2761      | 2.0865    | 4.5187      |
| 19  | A    | 479.7407   | 0.4910      | 2.0593    | 2.8411      |
| 20  | A    | 502.7669   | 0.4760      | 4.4863    | 70.8957     |
| 21  | A    | 536.1519   | 0.5026      | 11.2822   | 2.1446      |
| 22  | A    | 555.5088   | 0.5576      | 1.1973    | 0.5924      |
| 23  | A    | 683.6830   | 1.9085      | 0.3490    | 3.7644      |
| 24  | A    | 743.0545   | 1.0462      | 0.9508    | 0.5417      |
| 25  | A    | 764.7737   | 1.6785      | 23.1200   | 17.7004     |
| 26  | A    | 771.9444   | 0.4478      | 9.3124    | 7.3253      |

|    |   |           |        |          |          |
|----|---|-----------|--------|----------|----------|
| 27 | A | 812.4248  | 0.6990 | 67.6630  | 0.5758   |
| 28 | A | 827.9580  | 0.5559 | 3.9866   | 3.4977   |
| 29 | A | 828.9267  | 0.5150 | 0.6723   | 1.4754   |
| 30 | A | 888.5074  | 0.9353 | 4.2434   | 5.2064   |
| 31 | A | 958.2363  | 0.7149 | 1.2158   | 0.2666   |
| 32 | A | 969.0001  | 1.5830 | 29.4239  | 9.2354   |
| 33 | A | 989.9345  | 0.8244 | 0.0231   | 0.1694   |
| 34 | A | 1008.3249 | 4.3084 | 37.3479  | 26.1311  |
| 35 | A | 1027.8357 | 0.8137 | 1.3955   | 2.8928   |
| 36 | A | 1047.2393 | 0.8479 | 0.7755   | 2.3823   |
| 37 | A | 1079.0464 | 1.0439 | 16.5412  | 0.0705   |
| 38 | A | 1089.2079 | 1.4771 | 2.6104   | 4.9897   |
| 39 | A | 1095.3661 | 1.4062 | 0.1305   | 6.3645   |
| 40 | A | 1126.1807 | 0.9374 | 0.2319   | 3.6896   |
| 41 | A | 1131.3364 | 1.2308 | 3.9696   | 0.1148   |
| 42 | A | 1151.9591 | 1.0925 | 34.0374  | 3.8684   |
| 43 | A | 1200.4574 | 1.4925 | 7.7653   | 5.7332   |
| 44 | A | 1218.0925 | 1.2429 | 5.5188   | 9.1403   |
| 45 | A | 1228.5884 | 1.1927 | 50.3587  | 18.4271  |
| 46 | A | 1249.3714 | 2.9862 | 28.4212  | 0.5338   |
| 47 | A | 1256.6841 | 1.1643 | 24.5821  | 7.7541   |
| 48 | A | 1307.6087 | 1.1548 | 38.2654  | 7.4052   |
| 49 | A | 1312.4286 | 6.3773 | 0.9514   | 9.5257   |
| 50 | A | 1375.1264 | 1.5357 | 4.5807   | 1.0323   |
| 51 | A | 1376.5971 | 1.5771 | 5.3540   | 0.8425   |
| 52 | A | 1386.2774 | 3.4150 | 86.8452  | 11.0327  |
| 53 | A | 1418.7460 | 1.4825 | 8.8059   | 0.5988   |
| 54 | A | 1446.6832 | 1.6058 | 0.2140   | 7.3769   |
| 55 | A | 1459.0318 | 2.2882 | 4.3150   | 1.3961   |
| 56 | A | 1472.7518 | 1.4047 | 3.3487   | 12.5519  |
| 57 | A | 1478.9747 | 1.3841 | 4.2503   | 12.5272  |
| 58 | A | 1483.1895 | 1.5618 | 14.0477  | 10.9069  |
| 59 | A | 1490.3857 | 1.3693 | 3.8398   | 4.0502   |
| 60 | A | 1498.0203 | 1.4226 | 18.6535  | 14.0716  |
| 61 | A | 1500.4077 | 1.3864 | 9.7695   | 4.9711   |
| 62 | A | 1507.5569 | 1.4133 | 5.0427   | 2.9710   |
| 63 | A | 1509.0866 | 1.4413 | 1.0874   | 1.9885   |
| 64 | A | 1526.8249 | 1.5919 | 11.3954  | 7.3268   |
| 65 | A | 1544.5073 | 2.7316 | 109.5553 | 2.2804   |
| 66 | A | 1587.3457 | 9.9704 | 40.4903  | 1.5598   |
| 67 | A | 1637.5811 | 8.1195 | 282.8963 | 42.3966  |
| 68 | A | 2980.8719 | 5.5110 | 56.6341  | 92.1946  |
| 69 | A | 2986.7628 | 5.5509 | 110.7977 | 357.0440 |
| 70 | A | 2994.9265 | 5.6511 | 28.4774  | 309.7108 |
| 71 | A | 3025.9863 | 5.6002 | 19.4392  | 165.9570 |
| 72 | A | 3053.2370 | 5.9848 | 7.5077   | 78.9434  |
| 73 | A | 3078.6715 | 6.0438 | 7.2826   | 58.0118  |
| 74 | A | 3079.7642 | 6.0569 | 32.4853  | 48.0697  |
| 75 | A | 3088.5807 | 6.1208 | 12.4820  | 100.3867 |
| 76 | A | 3092.9172 | 6.0224 | 32.6854  | 107.4497 |
| 77 | A | 3102.5179 | 6.2483 | 26.4795  | 31.3773  |
| 78 | A | 3122.6333 | 6.3259 | 3.1781   | 2.2223   |
| 79 | A | 3132.0101 | 6.3481 | 25.5875  | 107.5706 |
| 80 | A | 3139.7983 | 6.3188 | 37.8661  | 111.4200 |
| 81 | A | 3142.8837 | 6.3518 | 11.0346  | 144.7001 |
| 82 | A | 3155.4260 | 6.5127 | 4.7331   | 65.9250  |
| 83 | A | 3215.1446 | 6.6462 | 5.8335   | 89.2472  |
| 84 | A | 3215.3075 | 6.6451 | 8.1894   | 54.1877  |

-----  
pyNR2-nC3H7I\_d\_1\_dimpy

| NM# | Symm | Wavenumber | Force Const | IR Intens | Raman Activ |
|-----|------|------------|-------------|-----------|-------------|
| 1   | A    | 4.1374     | 0.0000      | 0.0523    | 3.0979      |
| 2   | A    | 12.6538    | 0.0003      | 1.4209    | 0.3033      |
| 3   | A    | 15.0448    | 0.0006      | 1.9404    | 0.8515      |
| 4   | A    | 48.5154    | 0.0079      | 1.3177    | 1.6537      |
| 5   | A    | 57.0101    | 0.0171      | 3.0445    | 4.5350      |
| 6   | A    | 70.5001    | 0.0111      | 0.2038    | 0.9665      |
| 7   | A    | 82.6041    | 0.0101      | 0.0244    | 1.1952      |



|    |   |           |        |          |          |
|----|---|-----------|--------|----------|----------|
| 8  | A | 83.7597   | 0.0087 | 5.1494   | 0.3023   |
| 9  | A | 128.8607  | 0.0232 | 0.1880   | 1.1577   |
| 10 | A | 149.8481  | 0.0226 | 0.0470   | 3.8443   |
| 11 | A | 173.0716  | 0.0215 | 0.0883   | 0.2075   |
| 12 | A | 197.0319  | 0.0373 | 0.2089   | 3.4646   |
| 13 | A | 267.1008  | 0.0938 | 0.0216   | 0.9301   |
| 14 | A | 270.3226  | 0.0848 | 2.4553   | 1.7280   |
| 15 | A | 272.4608  | 0.0987 | 5.6321   | 11.1827  |
| 16 | A | 387.4877  | 0.2017 | 0.5657   | 30.5595  |
| 17 | A | 397.3849  | 0.2892 | 2.7350   | 13.6517  |
| 18 | A | 404.9514  | 0.2681 | 0.0135   | 0.2947   |
| 19 | A | 482.0600  | 0.4991 | 3.3397   | 2.7071   |
| 20 | A | 504.3163  | 0.4752 | 0.4959   | 141.0835 |
| 21 | A | 539.3686  | 0.4719 | 17.2180  | 2.8739   |
| 22 | A | 554.7072  | 0.6117 | 3.7201   | 2.1965   |
| 23 | A | 681.9791  | 1.8980 | 0.0254   | 3.4140   |
| 24 | A | 746.6950  | 1.0237 | 0.3911   | 0.0948   |
| 25 | A | 767.4599  | 1.6932 | 13.0568  | 23.9642  |
| 26 | A | 771.5951  | 0.4511 | 8.4121   | 5.4594   |
| 27 | A | 814.8287  | 0.7167 | 50.9703  | 0.7391   |
| 28 | A | 825.1324  | 0.5476 | 3.9268   | 6.1010   |
| 29 | A | 828.1890  | 0.5025 | 0.0016   | 0.3360   |
| 30 | A | 888.5470  | 0.9571 | 3.4536   | 7.7714   |
| 31 | A | 960.4777  | 0.7156 | 0.5188   | 0.8541   |
| 32 | A | 970.0451  | 1.6138 | 18.4641  | 26.1219  |
| 33 | A | 989.5416  | 0.8186 | 0.0044   | 0.2782   |
| 34 | A | 1012.1649 | 4.2126 | 75.8087  | 25.1260  |
| 35 | A | 1025.3454 | 0.8088 | 1.3573   | 3.0212   |
| 36 | A | 1048.2575 | 0.8419 | 0.1753   | 2.0192   |
| 37 | A | 1079.9717 | 1.0412 | 21.9993  | 0.2049   |
| 38 | A | 1087.5125 | 1.5009 | 2.5585   | 7.0157   |
| 39 | A | 1095.1165 | 1.4243 | 5.7119   | 23.2343  |
| 40 | A | 1132.6361 | 1.1485 | 0.6145   | 0.7664   |
| 41 | A | 1133.8181 | 0.9860 | 0.9749   | 1.6898   |
| 42 | A | 1143.1865 | 1.0403 | 21.7464  | 3.4832   |
| 43 | A | 1201.1716 | 1.4675 | 6.8749   | 10.1980  |
| 44 | A | 1218.9447 | 1.2397 | 8.9932   | 18.7936  |
| 45 | A | 1227.2533 | 1.2141 | 63.2647  | 22.4096  |
| 46 | A | 1254.5049 | 1.1619 | 62.5672  | 19.4436  |
| 47 | A | 1256.8639 | 3.1379 | 35.6855  | 0.0143   |
| 48 | A | 1308.5862 | 1.1537 | 39.7862  | 7.1570   |
| 49 | A | 1323.7113 | 5.7639 | 0.8519   | 10.2114  |
| 50 | A | 1374.8296 | 1.5702 | 10.3581  | 2.1079   |
| 51 | A | 1376.3730 | 1.5765 | 11.3235  | 0.0763   |
| 52 | A | 1396.4560 | 3.4104 | 151.6614 | 31.4860  |
| 53 | A | 1415.0676 | 1.4806 | 11.1226  | 1.1192   |
| 54 | A | 1447.7263 | 1.5331 | 0.4997   | 11.0254  |
| 55 | A | 1463.3176 | 2.5273 | 1.5066   | 0.4395   |
| 56 | A | 1472.7889 | 1.4016 | 2.6125   | 16.7655  |
| 57 | A | 1481.2118 | 1.3871 | 3.6311   | 15.8081  |
| 58 | A | 1485.3618 | 1.5912 | 22.0318  | 5.6588   |
| 59 | A | 1487.8252 | 1.3578 | 2.1660   | 7.1151   |
| 60 | A | 1495.8101 | 1.3924 | 18.5285  | 19.1179  |
| 61 | A | 1499.4050 | 1.3841 | 7.8370   | 6.4967   |
| 62 | A | 1507.8720 | 1.4160 | 5.5388   | 3.2888   |
| 63 | A | 1514.4440 | 1.4652 | 4.0212   | 1.3759   |
| 64 | A | 1528.5396 | 1.6111 | 15.5602  | 15.6785  |
| 65 | A | 1550.2950 | 2.8747 | 144.5793 | 2.3645   |
| 66 | A | 1584.3412 | 9.8949 | 37.6449  | 2.3239   |
| 67 | A | 1642.1218 | 8.1103 | 410.7145 | 70.3781  |
| 68 | A | 2983.7951 | 5.5037 | 71.7073  | 73.7217  |
| 69 | A | 2990.1932 | 5.5498 | 80.9417  | 289.7714 |
| 70 | A | 2991.1472 | 5.6362 | 36.9288  | 373.4793 |
| 71 | A | 3022.6420 | 5.5860 | 26.6943  | 200.4431 |
| 72 | A | 3046.9540 | 5.9582 | 8.6371   | 87.2471  |
| 73 | A | 3056.2384 | 5.9897 | 12.3702  | 113.6339 |
| 74 | A | 3057.2723 | 6.0039 | 48.8829  | 77.4151  |
| 75 | A | 3081.2093 | 5.9898 | 11.1177  | 163.8349 |
| 76 | A | 3085.5239 | 6.1001 | 51.4911  | 88.2741  |
| 77 | A | 3098.8403 | 6.2310 | 31.5668  | 28.1697  |
| 78 | A | 3120.9936 | 6.3024 | 2.5273   | 1.4769   |

|    |   |           |        |         |          |
|----|---|-----------|--------|---------|----------|
| 79 | A | 3132.7751 | 6.3342 | 36.6992 | 187.8033 |
| 80 | A | 3143.0559 | 6.4566 | 8.0180  | 75.4391  |
| 81 | A | 3145.0949 | 6.3413 | 24.5192 | 59.1645  |
| 82 | A | 3147.9567 | 6.3735 | 1.6409  | 75.3755  |
| 83 | A | 3212.9971 | 6.6396 | 8.6582  | 139.5586 |
| 84 | A | 3213.0768 | 6.6350 | 11.7128 | 46.9946  |

pyNR2-nC3H7I\_d\_2\_dimam

| NM# | Symm | Wavenumber | Force Const | IR Intens | Raman Activ |
|-----|------|------------|-------------|-----------|-------------|
| 1   | A    | 6.4356     | 0.0001      | 0.3173    | 0.4493      |
| 2   | A    | 13.7082    | 0.0005      | 0.9899    | 3.2286      |
| 3   | A    | 31.5778    | 0.0018      | 0.6319    | 5.2736      |
| 4   | A    | 32.9523    | 0.0049      | 0.5718    | 1.2854      |
| 5   | A    | 49.8408    | 0.0057      | 0.9998    | 1.1295      |
| 6   | A    | 69.5598    | 0.0158      | 0.1493    | 5.5405      |
| 7   | A    | 101.8762   | 0.0162      | 0.0285    | 0.2022      |
| 8   | A    | 126.2786   | 0.0214      | 0.4819    | 0.7188      |
| 9   | A    | 139.6804   | 0.0397      | 5.1569    | 4.9583      |
| 10  | A    | 163.8024   | 0.0190      | 9.1858    | 5.8852      |
| 11  | A    | 172.1002   | 0.0224      | 0.3877    | 0.1893      |
| 12  | A    | 196.8150   | 0.0371      | 0.4574    | 2.4279      |
| 13  | A    | 270.5153   | 0.0645      | 0.0771    | 5.9355      |
| 14  | A    | 280.9799   | 0.1744      | 35.5117   | 9.8585      |
| 15  | A    | 282.7183   | 0.0966      | 0.3138    | 0.0706      |
| 16  | A    | 387.3409   | 0.2042      | 0.6860    | 14.3696     |
| 17  | A    | 398.7905   | 0.2554      | 0.0232    | 0.1494      |
| 18  | A    | 404.0544   | 0.2761      | 2.0864    | 4.5188      |
| 19  | A    | 479.7416   | 0.4910      | 2.0593    | 2.8411      |
| 20  | A    | 502.7681   | 0.4760      | 4.4861    | 70.8975     |
| 21  | A    | 536.1533   | 0.5026      | 11.2815   | 2.1446      |
| 22  | A    | 555.5090   | 0.5576      | 1.1976    | 0.5924      |
| 23  | A    | 683.6832   | 1.9085      | 0.3490    | 3.7644      |
| 24  | A    | 743.0568   | 1.0462      | 0.9513    | 0.5418      |
| 25  | A    | 764.7737   | 1.6785      | 23.1192   | 17.7004     |
| 26  | A    | 771.9444   | 0.4478      | 9.3123    | 7.3252      |
| 27  | A    | 812.4282   | 0.6990      | 67.6643   | 0.5758      |
| 28  | A    | 827.9599   | 0.5559      | 3.9912    | 3.5039      |
| 29  | A    | 828.9320   | 0.5149      | 0.6676    | 1.4692      |
| 30  | A    | 888.5074   | 0.9353      | 4.2435    | 5.2064      |
| 31  | A    | 958.2377   | 0.7149      | 1.2158    | 0.2666      |
| 32  | A    | 969.0002   | 1.5830      | 29.4238   | 9.2353      |
| 33  | A    | 989.9363   | 0.8244      | 0.0231    | 0.1694      |
| 34  | A    | 1008.3251  | 4.3085      | 37.3476   | 26.1315     |
| 35  | A    | 1027.8368  | 0.8137      | 1.3956    | 2.8927      |
| 36  | A    | 1047.2396  | 0.8479      | 0.7755    | 2.3823      |
| 37  | A    | 1079.0459  | 1.0439      | 16.5415   | 0.0705      |
| 38  | A    | 1089.2089  | 1.4771      | 2.6103    | 4.9898      |
| 39  | A    | 1095.3679  | 1.4062      | 0.1306    | 6.3645      |
| 40  | A    | 1126.1809  | 0.9374      | 0.2319    | 3.6896      |
| 41  | A    | 1131.3375  | 1.2308      | 3.9694    | 0.1147      |
| 42  | A    | 1151.9593  | 1.0925      | 34.0377   | 3.8683      |
| 43  | A    | 1200.4572  | 1.4925      | 7.7656    | 5.7331      |
| 44  | A    | 1218.0924  | 1.2429      | 5.5200    | 9.1411      |
| 45  | A    | 1228.5890  | 1.1928      | 50.3571   | 18.4263     |
| 46  | A    | 1249.3722  | 2.9862      | 28.4212   | 0.5338      |
| 47  | A    | 1256.6849  | 1.1642      | 24.5823   | 7.7542      |
| 48  | A    | 1307.6092  | 1.1548      | 38.2659   | 7.4052      |
| 49  | A    | 1312.4289  | 6.3774      | 0.9515    | 9.5258      |
| 50  | A    | 1375.1272  | 1.5357      | 4.5807    | 1.0323      |
| 51  | A    | 1376.5976  | 1.5771      | 5.3540    | 0.8426      |
| 52  | A    | 1386.2777  | 3.4150      | 86.8454   | 11.0330     |
| 53  | A    | 1418.7464  | 1.4825      | 8.8059    | 0.5988      |
| 54  | A    | 1446.6830  | 1.6058      | 0.2140    | 7.3767      |
| 55  | A    | 1459.0322  | 2.2882      | 4.3149    | 1.3961      |
| 56  | A    | 1472.7518  | 1.4047      | 3.3487    | 12.5521     |
| 57  | A    | 1478.9749  | 1.3841      | 4.2502    | 12.5271     |
| 58  | A    | 1483.1898  | 1.5618      | 14.0468   | 10.9073     |
| 59  | A    | 1490.3831  | 1.3693      | 3.8398    | 4.0500      |

|    |   |           |        |          |          |
|----|---|-----------|--------|----------|----------|
| 60 | A | 1498.0181 | 1.4225 | 18.6541  | 14.0708  |
| 61 | A | 1500.4077 | 1.3864 | 9.7675   | 4.9720   |
| 62 | A | 1507.5571 | 1.4133 | 5.0426   | 2.9710   |
| 63 | A | 1509.0873 | 1.4413 | 1.0874   | 1.9886   |
| 64 | A | 1526.8255 | 1.5919 | 11.3972  | 7.3269   |
| 65 | A | 1544.5072 | 2.7317 | 109.5564 | 2.2802   |
| 66 | A | 1587.3463 | 9.9704 | 40.4903  | 1.5598   |
| 67 | A | 1637.5813 | 8.1194 | 282.8986 | 42.3967  |
| 68 | A | 2980.8745 | 5.5110 | 56.6338  | 92.1925  |
| 69 | A | 2986.7657 | 5.5509 | 110.7963 | 357.0383 |
| 70 | A | 2994.9286 | 5.6511 | 28.4775  | 309.7132 |
| 71 | A | 3025.9855 | 5.6002 | 19.4397  | 165.9611 |
| 72 | A | 3053.2365 | 5.9848 | 7.5077   | 78.9448  |
| 73 | A | 3078.6724 | 6.0438 | 7.2797   | 58.0133  |
| 74 | A | 3079.7649 | 6.0569 | 32.4883  | 48.0671  |
| 75 | A | 3088.5796 | 6.1208 | 12.4877  | 100.3794 |
| 76 | A | 3092.9167 | 6.0224 | 32.6807  | 107.4663 |
| 77 | A | 3102.5181 | 6.2483 | 26.4790  | 31.3679  |
| 78 | A | 3122.6340 | 6.3259 | 3.1781   | 2.2221   |
| 79 | A | 3132.0107 | 6.3481 | 25.5872  | 107.5692 |
| 80 | A | 3139.7986 | 6.3188 | 37.8661  | 111.4204 |
| 81 | A | 3142.8841 | 6.3518 | 11.0346  | 144.7003 |
| 82 | A | 3155.4259 | 6.5127 | 4.7331   | 65.9254  |
| 83 | A | 3215.1448 | 6.6462 | 5.8335   | 89.2477  |
| 84 | A | 3215.3077 | 6.6451 | 8.1894   | 54.1871  |

-----  
pyNR2-nC3H7I\_d\_2\_dimpy

| NM# | Symm | Wavenumber | Force Const | IR Intens | Raman Activ |
|-----|------|------------|-------------|-----------|-------------|
| 1   | A    | 4.2819     | 0.0000      | 0.1552    | 2.8085      |
| 2   | A    | 12.7123    | 0.0003      | 1.3802    | 0.3261      |
| 3   | A    | 15.1435    | 0.0006      | 1.9895    | 0.6039      |
| 4   | A    | 48.3343    | 0.0078      | 0.2574    | 1.5307      |
| 5   | A    | 57.0154    | 0.0166      | 4.4642    | 4.8458      |
| 6   | A    | 70.4190    | 0.0110      | 0.1529    | 0.9853      |
| 7   | A    | 82.6450    | 0.0101      | 0.0133    | 1.2022      |
| 8   | A    | 84.6673    | 0.0089      | 4.7208    | 0.5337      |
| 9   | A    | 128.8541   | 0.0232      | 0.2385    | 0.8572      |
| 10  | A    | 149.8122   | 0.0226      | 0.0688    | 3.4985      |
| 11  | A    | 173.0879   | 0.0215      | 0.0848    | 0.2106      |
| 12  | A    | 197.0867   | 0.0373      | 0.1558    | 4.4090      |
| 13  | A    | 267.2170   | 0.0939      | 0.1064    | 1.4976      |
| 14  | A    | 270.2342   | 0.0837      | 3.3504    | 11.2284     |
| 15  | A    | 272.6879   | 0.1004      | 4.3922    | 0.7133      |
| 16  | A    | 387.4724   | 0.2016      | 0.4689    | 29.8185     |
| 17  | A    | 397.4492   | 0.2892      | 2.8837    | 14.5072     |
| 18  | A    | 405.3494   | 0.2684      | 0.0257    | 0.3340      |
| 19  | A    | 482.0601   | 0.4991      | 3.3311    | 2.7004      |
| 20  | A    | 504.3142   | 0.4751      | 0.4818    | 142.4826    |
| 21  | A    | 539.4040   | 0.4724      | 18.0302   | 1.2286      |
| 22  | A    | 554.6988   | 0.6111      | 3.3259    | 2.7603      |
| 23  | A    | 681.9871   | 1.8980      | 0.0251    | 3.4220      |
| 24  | A    | 746.7367   | 1.0233      | 0.4984    | 0.3497      |
| 25  | A    | 767.4764   | 1.7068      | 12.2435   | 23.4302     |
| 26  | A    | 771.5720   | 0.4501      | 8.8943    | 5.6949      |
| 27  | A    | 814.8790   | 0.7167      | 50.8523   | 0.7368      |
| 28  | A    | 825.1210   | 0.5476      | 3.8941    | 6.1245      |
| 29  | A    | 828.2495   | 0.5026      | 0.0014    | 0.3270      |
| 30  | A    | 888.5465   | 0.9571      | 3.4723    | 7.7957      |
| 31  | A    | 960.5605   | 0.7161      | 0.5102    | 0.7654      |
| 32  | A    | 970.0483   | 1.6124      | 18.6981   | 26.4443     |
| 33  | A    | 989.5953   | 0.8189      | 0.0055    | 0.2216      |
| 34  | A    | 1012.1636  | 4.2128      | 76.1198   | 25.1733     |
| 35  | A    | 1025.3290  | 0.8087      | 1.3544    | 3.0375      |
| 36  | A    | 1048.2381  | 0.8418      | 0.1791    | 2.0105      |
| 37  | A    | 1079.9645  | 1.0412      | 21.9815   | 0.2060      |
| 38  | A    | 1087.4509  | 1.5007      | 2.5422    | 7.0647      |
| 39  | A    | 1095.1274  | 1.4244      | 5.6513    | 23.3057     |
| 40  | A    | 1132.6418  | 1.1445      | 0.5942    | 0.7660      |

|    |   |           |        |          |          |
|----|---|-----------|--------|----------|----------|
| 41 | A | 1133.7840 | 0.9890 | 0.9979   | 1.7434   |
| 42 | A | 1143.2483 | 1.0406 | 21.8620  | 3.4102   |
| 43 | A | 1201.1615 | 1.4677 | 6.8992   | 10.2079  |
| 44 | A | 1218.9139 | 1.2395 | 9.0700   | 19.0470  |
| 45 | A | 1227.2347 | 1.2143 | 63.3372  | 22.4811  |
| 46 | A | 1254.5114 | 1.1619 | 62.8330  | 19.7621  |
| 47 | A | 1256.8173 | 3.1362 | 35.6383  | 0.0171   |
| 48 | A | 1308.5773 | 1.1536 | 39.8909  | 7.0317   |
| 49 | A | 1323.6717 | 5.7698 | 0.8546   | 10.1715  |
| 50 | A | 1374.8100 | 1.5702 | 10.4408  | 2.1287   |
| 51 | A | 1376.3569 | 1.5761 | 11.3064  | 0.0844   |
| 52 | A | 1396.4139 | 3.4106 | 151.9374 | 31.3103  |
| 53 | A | 1415.0651 | 1.4807 | 11.1400  | 1.1289   |
| 54 | A | 1447.7375 | 1.5336 | 0.5029   | 11.0396  |
| 55 | A | 1463.3156 | 2.5260 | 1.5109   | 0.5179   |
| 56 | A | 1472.7764 | 1.4016 | 2.6370   | 16.7117  |
| 57 | A | 1481.2132 | 1.3871 | 3.6233   | 15.8752  |
| 58 | A | 1485.3739 | 1.5911 | 22.0553  | 5.6754   |
| 59 | A | 1487.8653 | 1.3579 | 2.1895   | 7.1087   |
| 60 | A | 1495.8383 | 1.3925 | 18.2761  | 19.6750  |
| 61 | A | 1499.4087 | 1.3842 | 7.8244   | 6.5010   |
| 62 | A | 1507.8764 | 1.4160 | 5.7107   | 3.3203   |
| 63 | A | 1514.3945 | 1.4650 | 4.0100   | 1.4590   |
| 64 | A | 1528.5085 | 1.6107 | 15.4498  | 15.5521  |
| 65 | A | 1550.2735 | 2.8749 | 144.5128 | 2.2896   |
| 66 | A | 1584.3557 | 9.8952 | 37.6445  | 2.3215   |
| 67 | A | 1642.1152 | 8.1105 | 411.1267 | 70.7881  |
| 68 | A | 2983.7850 | 5.5038 | 71.6215  | 75.9980  |
| 69 | A | 2990.1804 | 5.5498 | 83.1033  | 291.6760 |
| 70 | A | 2991.1299 | 5.6361 | 36.6769  | 379.4435 |
| 71 | A | 3022.6497 | 5.5861 | 26.6141  | 201.4456 |
| 72 | A | 3047.0102 | 5.9584 | 8.6210   | 87.3134  |
| 73 | A | 3056.3485 | 5.9900 | 12.4125  | 112.3213 |
| 74 | A | 3057.3795 | 6.0042 | 48.3235  | 75.6190  |
| 75 | A | 3081.2067 | 5.9889 | 11.1525  | 163.8142 |
| 76 | A | 3085.5375 | 6.1010 | 51.4870  | 87.7486  |
| 77 | A | 3098.8859 | 6.2312 | 31.5641  | 28.4473  |
| 78 | A | 3120.9645 | 6.3023 | 2.5331   | 1.4119   |
| 79 | A | 3132.7354 | 6.3341 | 36.6943  | 187.2765 |
| 80 | A | 3143.0390 | 6.4565 | 8.0229   | 74.6978  |
| 81 | A | 3145.0975 | 6.3413 | 24.5243  | 59.2053  |
| 82 | A | 3147.9608 | 6.3735 | 1.6226   | 75.3182  |
| 83 | A | 3213.0496 | 6.6407 | 8.0613   | 155.7853 |
| 84 | A | 3213.1084 | 6.6343 | 12.3063  | 30.8295  |

pyNR2-nC3H7I\_s\_1\_dimam

| NM# | Symm | Wavenumber | Force Const | IR Intens | Raman Activ |
|-----|------|------------|-------------|-----------|-------------|
| 1   | A    | 4.9144     | 0.0000      | 0.3030    | 0.5671      |
| 2   | A    | 15.6617    | 0.0007      | 0.9810    | 4.1090      |
| 3   | A    | 30.3380    | 0.0013      | 0.4231    | 5.1383      |
| 4   | A    | 32.3335    | 0.0055      | 0.5083    | 0.6099      |
| 5   | A    | 47.3515    | 0.0045      | 0.5311    | 1.5947      |
| 6   | A    | 70.2496    | 0.0160      | 0.2866    | 6.7146      |
| 7   | A    | 102.0870   | 0.0161      | 0.0360    | 0.0774      |
| 8   | A    | 114.4404   | 0.0206      | 0.7147    | 0.3079      |
| 9   | A    | 140.7778   | 0.0392      | 5.0728    | 5.0976      |
| 10  | A    | 167.0422   | 0.0199      | 10.2178   | 6.8169      |
| 11  | A    | 172.8522   | 0.0226      | 0.4025    | 0.1811      |
| 12  | A    | 198.0356   | 0.0821      | 0.9419    | 4.3148      |
| 13  | A    | 237.5833   | 0.0360      | 0.0388    | 0.0378      |
| 14  | A    | 278.6140   | 0.1702      | 7.8060    | 36.6732     |
| 15  | A    | 283.0916   | 0.1796      | 31.6960   | 3.2591      |
| 16  | A    | 284.1076   | 0.0963      | 0.0165    | 0.0010      |
| 17  | A    | 397.9337   | 0.2545      | 0.0206    | 0.1528      |
| 18  | A    | 405.0570   | 0.2752      | 2.2377    | 4.6967      |
| 19  | A    | 479.5185   | 0.4901      | 2.0016    | 2.8491      |
| 20  | A    | 536.0289   | 0.5034      | 11.9944   | 2.0180      |
| 21  | A    | 555.7647   | 0.5559      | 1.1220    | 0.5973      |

|    |   |           |        |          |          |
|----|---|-----------|--------|----------|----------|
| 22 | A | 594.8439  | 0.7827 | 10.8011  | 90.9146  |
| 23 | A | 683.7241  | 1.9084 | 0.3556   | 3.8652   |
| 24 | A | 734.6712  | 0.3474 | 3.2360   | 0.1445   |
| 25 | A | 742.6543  | 1.0515 | 1.0579   | 0.5661   |
| 26 | A | 764.8304  | 1.7203 | 24.3336  | 20.0572  |
| 27 | A | 812.2891  | 0.6969 | 67.3432  | 0.6020   |
| 28 | A | 828.6035  | 0.5059 | 0.2846   | 0.4681   |
| 29 | A | 837.5305  | 0.4895 | 0.1132   | 0.6306   |
| 30 | A | 901.1440  | 0.9244 | 7.0478   | 0.4186   |
| 31 | A | 957.9360  | 0.7147 | 1.3459   | 0.1793   |
| 32 | A | 968.6735  | 1.5792 | 29.5610  | 8.9160   |
| 33 | A | 988.7836  | 0.8221 | 0.0266   | 0.1939   |
| 34 | A | 1008.3535 | 4.3162 | 37.2791  | 27.7451  |
| 35 | A | 1029.1073 | 0.6890 | 0.9817   | 1.2089   |
| 36 | A | 1029.2844 | 1.8170 | 0.8045   | 32.9202  |
| 37 | A | 1078.7409 | 1.0440 | 16.4285  | 0.0833   |
| 38 | A | 1095.4846 | 1.4061 | 0.1665   | 6.5337   |
| 39 | A | 1106.4233 | 1.4353 | 1.8155   | 4.4547   |
| 40 | A | 1125.3743 | 0.9336 | 0.3324   | 3.6692   |
| 41 | A | 1131.3454 | 1.2378 | 3.8949   | 0.0846   |
| 42 | A | 1152.7461 | 1.0979 | 37.4658  | 4.2340   |
| 43 | A | 1200.2997 | 1.4907 | 10.6908  | 5.9448   |
| 44 | A | 1216.7053 | 1.0836 | 77.9559  | 34.3636  |
| 45 | A | 1236.8685 | 1.3091 | 0.3436   | 0.4857   |
| 46 | A | 1248.4174 | 2.9593 | 27.8224  | 0.5958   |
| 47 | A | 1256.8371 | 1.1644 | 24.6919  | 7.9329   |
| 48 | A | 1311.7174 | 6.4702 | 1.0339   | 9.9496   |
| 49 | A | 1323.8017 | 1.1408 | 0.3741   | 6.5931   |
| 50 | A | 1359.9006 | 1.5069 | 2.4172   | 19.8190  |
| 51 | A | 1374.9340 | 1.5325 | 4.4286   | 1.1207   |
| 52 | A | 1385.2727 | 3.4294 | 89.5445  | 12.2331  |
| 53 | A | 1411.4900 | 1.4333 | 2.1152   | 0.8995   |
| 54 | A | 1446.5936 | 1.6084 | 0.2491   | 7.3266   |
| 55 | A | 1458.8805 | 2.2790 | 4.3656   | 1.4720   |
| 56 | A | 1479.6845 | 1.4273 | 1.6477   | 8.7396   |
| 57 | A | 1483.0396 | 1.5604 | 14.8065  | 12.7585  |
| 58 | A | 1490.6034 | 1.3703 | 3.6415   | 3.5431   |
| 59 | A | 1494.3773 | 1.3798 | 2.3976   | 13.0452  |
| 60 | A | 1498.3395 | 1.4262 | 22.3947  | 13.1401  |
| 61 | A | 1498.9742 | 1.3753 | 9.1197   | 10.1336  |
| 62 | A | 1508.6017 | 1.4390 | 1.0918   | 2.1532   |
| 63 | A | 1509.4147 | 1.4580 | 7.6004   | 0.8429   |
| 64 | A | 1526.6976 | 1.5873 | 12.4628  | 7.3777   |
| 65 | A | 1544.2330 | 2.7285 | 111.7885 | 2.8672   |
| 66 | A | 1587.5201 | 9.9800 | 40.9753  | 1.5749   |
| 67 | A | 1637.4253 | 8.1212 | 289.3945 | 44.4682  |
| 68 | A | 2980.6365 | 5.5113 | 55.4021  | 90.8399  |
| 69 | A | 2986.4788 | 5.5507 | 111.3746 | 362.9722 |
| 70 | A | 3021.2939 | 5.5669 | 34.3129  | 201.6016 |
| 71 | A | 3039.8173 | 5.7687 | 6.2277   | 72.3741  |
| 72 | A | 3065.5293 | 6.1071 | 0.3449   | 98.6935  |
| 73 | A | 3080.4426 | 6.0480 | 7.0732   | 56.6240  |
| 74 | A | 3081.5687 | 6.0610 | 33.1518  | 49.3017  |
| 75 | A | 3087.1100 | 5.9802 | 9.0986   | 133.6807 |
| 76 | A | 3089.7800 | 6.2093 | 37.4782  | 10.8974  |
| 77 | A | 3091.6376 | 6.1453 | 34.5612  | 113.6473 |
| 78 | A | 3123.0076 | 6.3291 | 3.3649   | 2.6707   |
| 79 | A | 3132.1406 | 6.3504 | 25.3430  | 104.6923 |
| 80 | A | 3139.9902 | 6.3196 | 37.9862  | 113.9473 |
| 81 | A | 3143.0742 | 6.3526 | 11.3214  | 146.9761 |
| 82 | A | 3150.8724 | 6.4975 | 6.8556   | 46.0522  |
| 83 | A | 3215.3682 | 6.6494 | 2.8158   | 135.1209 |
| 84 | A | 3215.4130 | 6.6430 | 11.4093  | 9.8622   |

-----  
pyNR2-nC3H7I\_s\_1\_dimpy

| NM# | Symm | Wavenumber | Force Const | IR Intens | Raman Activ |
|-----|------|------------|-------------|-----------|-------------|
| 1   | A    | 3.6872     | 0.0000      | 0.2340    | 2.0746      |
| 2   | A    | 13.1978    | 0.0003      | 1.1507    | 0.2856      |

|    |   |           |        |          |          |
|----|---|-----------|--------|----------|----------|
| 3  | A | 14.1493   | 0.0005 | 1.8252   | 0.3991   |
| 4  | A | 48.3653   | 0.0082 | 0.2769   | 1.9805   |
| 5  | A | 56.7190   | 0.0160 | 4.7504   | 4.8178   |
| 6  | A | 62.8907   | 0.0065 | 0.0006   | 0.6054   |
| 7  | A | 82.6538   | 0.0101 | 0.0118   | 1.2181   |
| 8  | A | 84.5887   | 0.0088 | 4.7403   | 0.4947   |
| 9  | A | 122.1971  | 0.0256 | 0.4674   | 0.7930   |
| 10 | A | 149.7654  | 0.0228 | 0.0548   | 2.9564   |
| 11 | A | 173.0821  | 0.0215 | 0.0761   | 0.2208   |
| 12 | A | 203.3735  | 0.0876 | 0.4406   | 8.4310   |
| 13 | A | 239.1869  | 0.0365 | 0.0343   | 0.0320   |
| 14 | A | 267.6602  | 0.1013 | 0.0000   | 0.1420   |
| 15 | A | 272.2559  | 0.1376 | 7.7575   | 2.4130   |
| 16 | A | 278.9128  | 0.1677 | 1.3247   | 53.1205  |
| 17 | A | 397.5015  | 0.2893 | 3.0306   | 14.9177  |
| 18 | A | 405.5897  | 0.2686 | 0.0258   | 0.3435   |
| 19 | A | 482.0959  | 0.4992 | 3.3089   | 2.6567   |
| 20 | A | 539.3938  | 0.4716 | 17.8031  | 2.5311   |
| 21 | A | 554.7118  | 0.6123 | 3.3851   | 1.5297   |
| 22 | A | 598.2904  | 0.7664 | 2.3841   | 161.0150 |
| 23 | A | 681.9746  | 1.8965 | 0.0237   | 3.4321   |
| 24 | A | 731.3177  | 0.3456 | 3.6429   | 0.1016   |
| 25 | A | 746.9871  | 1.0228 | 0.3971   | 0.2323   |
| 26 | A | 767.5620  | 1.7257 | 11.4267  | 22.7416  |
| 27 | A | 814.8745  | 0.7171 | 51.0322  | 0.7156   |
| 28 | A | 828.1971  | 0.5025 | 0.0005   | 0.3353   |
| 29 | A | 834.0948  | 0.4865 | 0.0058   | 0.8241   |
| 30 | A | 900.0160  | 0.9303 | 5.7994   | 0.5726   |
| 31 | A | 960.7052  | 0.7172 | 0.5236   | 0.8964   |
| 32 | A | 970.0586  | 1.6122 | 18.5962  | 27.1050  |
| 33 | A | 989.4265  | 0.8189 | 0.0051   | 0.2401   |
| 34 | A | 1012.3235 | 4.2150 | 76.9556  | 24.0473  |
| 35 | A | 1025.4898 | 0.6851 | 1.5233   | 1.0491   |
| 36 | A | 1031.1738 | 1.7632 | 0.1884   | 36.0331  |
| 37 | A | 1079.9710 | 1.0413 | 21.9932  | 0.2113   |
| 38 | A | 1095.1400 | 1.4245 | 6.4376   | 22.9569  |
| 39 | A | 1104.8035 | 1.4313 | 3.0110   | 10.7316  |
| 40 | A | 1132.7255 | 1.1337 | 0.5473   | 0.8717   |
| 41 | A | 1133.8399 | 0.9972 | 1.0622   | 1.6364   |
| 42 | A | 1143.2279 | 1.0404 | 22.1074  | 3.4393   |
| 43 | A | 1201.1751 | 1.4674 | 7.3918   | 10.2101  |
| 44 | A | 1212.6525 | 1.0913 | 92.8160  | 49.0564  |
| 45 | A | 1237.5285 | 1.3110 | 0.3005   | 0.5123   |
| 46 | A | 1254.5480 | 1.1611 | 62.2939  | 20.1995  |
| 47 | A | 1256.8643 | 3.1342 | 35.7330  | 0.0122   |
| 48 | A | 1322.7778 | 1.1395 | 0.2696   | 7.1053   |
| 49 | A | 1323.7645 | 5.7515 | 0.8353   | 10.5633  |
| 50 | A | 1358.4109 | 1.5139 | 1.0406   | 30.5112  |
| 51 | A | 1376.3762 | 1.5764 | 11.2061  | 0.0832   |
| 52 | A | 1396.4620 | 3.4123 | 155.9422 | 33.0916  |
| 53 | A | 1409.5329 | 1.4342 | 2.5359   | 1.0526   |
| 54 | A | 1447.7632 | 1.5323 | 0.5012   | 11.0505  |
| 55 | A | 1463.4005 | 2.5303 | 1.5275   | 0.5272   |
| 56 | A | 1479.2866 | 1.4224 | 1.5316   | 12.4231  |
| 57 | A | 1485.3915 | 1.5911 | 22.0655  | 5.8402   |
| 58 | A | 1487.8589 | 1.3579 | 2.1813   | 7.1251   |
| 59 | A | 1493.6853 | 1.3822 | 1.9619   | 13.5515  |
| 60 | A | 1495.8547 | 1.3924 | 18.2755  | 19.6988  |
| 61 | A | 1498.4682 | 1.3749 | 8.5689   | 10.9721  |
| 62 | A | 1508.7461 | 1.4533 | 7.2612   | 1.1975   |
| 63 | A | 1514.4091 | 1.4652 | 4.0188   | 1.4515   |
| 64 | A | 1528.5321 | 1.6101 | 15.8649  | 16.0210  |
| 65 | A | 1550.3673 | 2.8789 | 144.8116 | 2.3232   |
| 66 | A | 1584.3626 | 9.8933 | 37.8775  | 2.3666   |
| 67 | A | 1642.2352 | 8.1116 | 415.4320 | 72.0876  |
| 68 | A | 2983.8724 | 5.5039 | 71.7443  | 76.1007  |
| 69 | A | 2990.2697 | 5.5496 | 78.2216  | 320.0517 |
| 70 | A | 3017.8886 | 5.5528 | 42.3958  | 230.3018 |
| 71 | A | 3033.1645 | 5.7434 | 7.9111   | 90.3466  |
| 72 | A | 3056.3222 | 5.9901 | 12.3531  | 112.5826 |
| 73 | A | 3057.3535 | 6.0044 | 48.4818  | 76.1933  |

|    |   |           |        |         |          |
|----|---|-----------|--------|---------|----------|
| 74 | A | 3058.7169 | 6.0787 | 0.0160  | 107.0924 |
| 75 | A | 3077.8702 | 5.9149 | 18.8491 | 146.6599 |
| 76 | A | 3084.7250 | 6.1868 | 42.4529 | 14.3348  |
| 77 | A | 3085.0852 | 6.1514 | 43.5509 | 150.6659 |
| 78 | A | 3121.0129 | 6.3025 | 2.5318  | 1.4227   |
| 79 | A | 3132.7907 | 6.3343 | 36.8318 | 188.5222 |
| 80 | A | 3138.5242 | 6.4431 | 11.4407 | 52.9248  |
| 81 | A | 3145.3213 | 6.3422 | 24.7054 | 59.3646  |
| 82 | A | 3148.1814 | 6.3745 | 1.4207  | 74.9019  |
| 83 | A | 3213.1421 | 6.6411 | 8.2359  | 156.6088 |
| 84 | A | 3213.2000 | 6.6346 | 12.2858 | 31.4487  |

-----  
pyNR2-nC3H7I\_s\_2\_dimam

| NM# | Symm | Wavenumber | Force Const | IR Intens | Raman Activ |
|-----|------|------------|-------------|-----------|-------------|
| 1   | A    | 1.1769     | 0.0000      | 0.0027    | 0.3776      |
| 2   | A    | 17.3118    | 0.0009      | 0.8497    | 4.1702      |
| 3   | A    | 29.8548    | 0.0016      | 0.4597    | 4.2430      |
| 4   | A    | 31.1668    | 0.0028      | 0.4919    | 2.1714      |
| 5   | A    | 47.5271    | 0.0045      | 0.5453    | 1.4861      |
| 6   | A    | 70.4074    | 0.0165      | 0.6202    | 7.1019      |
| 7   | A    | 101.8614   | 0.0160      | 0.0282    | 0.0720      |
| 8   | A    | 114.5820   | 0.0205      | 0.7040    | 0.2926      |
| 9   | A    | 140.8583   | 0.0386      | 5.6215    | 4.6863      |
| 10  | A    | 166.9965   | 0.0200      | 11.2005   | 6.4410      |
| 11  | A    | 171.8782   | 0.0223      | 0.4025    | 0.1724      |
| 12  | A    | 198.1236   | 0.0821      | 0.8698    | 4.6627      |
| 13  | A    | 237.5081   | 0.0360      | 0.0396    | 0.0323      |
| 14  | A    | 278.4234   | 0.1717      | 6.9314    | 41.1226     |
| 15  | A    | 283.3312   | 0.1795      | 35.0596   | 2.7728      |
| 16  | A    | 284.0929   | 0.0967      | 0.0534    | 0.0046      |
| 17  | A    | 397.6093   | 0.2542      | 0.0217    | 0.1678      |
| 18  | A    | 405.1977   | 0.2752      | 2.2062    | 4.8709      |
| 19  | A    | 479.4474   | 0.4899      | 1.9551    | 2.9162      |
| 20  | A    | 536.2752   | 0.5049      | 12.0685   | 1.8857      |
| 21  | A    | 555.8873   | 0.5538      | 1.7007    | 1.4089      |
| 22  | A    | 595.2590   | 0.7830      | 10.7315   | 98.1691     |
| 23  | A    | 683.7170   | 1.9083      | 0.3631    | 3.9562      |
| 24  | A    | 734.8682   | 0.3476      | 3.2913    | 0.1346      |
| 25  | A    | 742.8114   | 1.0440      | 1.1147    | 0.5653      |
| 26  | A    | 764.8407   | 1.7199      | 27.3078   | 20.4455     |
| 27  | A    | 812.7933   | 0.7012      | 67.0003   | 0.6814      |
| 28  | A    | 828.6510   | 0.5062      | 0.2433    | 0.4956      |
| 29  | A    | 837.7362   | 0.4892      | 0.0894    | 0.7425      |
| 30  | A    | 901.3566   | 0.9241      | 8.0021    | 0.2895      |
| 31  | A    | 957.9989   | 0.7154      | 1.4386    | 0.1789      |
| 32  | A    | 968.6014   | 1.5769      | 27.8365   | 8.9511      |
| 33  | A    | 988.5404   | 0.8215      | 0.0285    | 0.2051      |
| 34  | A    | 1008.3596  | 4.3188      | 37.6372   | 29.7050     |
| 35  | A    | 1029.3771  | 1.8100      | 0.9106    | 35.1596     |
| 36  | A    | 1029.8936  | 0.6913      | 1.0244    | 1.2578      |
| 37  | A    | 1078.6106  | 1.0439      | 16.3392   | 0.0749      |
| 38  | A    | 1095.5287  | 1.4061      | 0.1831    | 6.7494      |
| 39  | A    | 1106.9880  | 1.4365      | 1.9164    | 4.2762      |
| 40  | A    | 1125.2036  | 0.9327      | 0.3464    | 3.5369      |
| 41  | A    | 1131.3438  | 1.2393      | 3.8068    | 0.0765      |
| 42  | A    | 1152.8977  | 1.0991      | 40.3659   | 4.9139      |
| 43  | A    | 1200.1862  | 1.4904      | 13.1392   | 6.1337      |
| 44  | A    | 1218.1173  | 1.0862      | 80.3574   | 38.7261     |
| 45  | A    | 1237.6333  | 1.3091      | 0.2431    | 0.4694      |
| 46  | A    | 1248.2064  | 2.9565      | 27.6297   | 0.6805      |
| 47  | A    | 1256.8694  | 1.1645      | 25.1350   | 8.1952      |
| 48  | A    | 1311.5176  | 6.4897      | 1.0360    | 10.6221     |
| 49  | A    | 1322.7799  | 1.1392      | 0.3747    | 6.9762      |
| 50  | A    | 1358.5456  | 1.5087      | 3.4926    | 21.5859     |
| 51  | A    | 1374.8821  | 1.5318      | 4.3862    | 1.1406      |
| 52  | A    | 1384.9419  | 3.4285      | 93.4490   | 13.5325     |
| 53  | A    | 1411.7000  | 1.4335      | 2.3819    | 0.9598      |
| 54  | A    | 1446.5120  | 1.6076      | 0.2796    | 7.3854      |

|    |   |           |        |          |          |
|----|---|-----------|--------|----------|----------|
| 55 | A | 1458.8119 | 2.2782 | 4.3773   | 1.4700   |
| 56 | A | 1479.9629 | 1.4278 | 1.8383   | 9.6591   |
| 57 | A | 1482.9646 | 1.5599 | 16.2847  | 14.4475  |
| 58 | A | 1490.4705 | 1.3702 | 3.5101   | 3.5531   |
| 59 | A | 1494.4303 | 1.3806 | 2.9620   | 14.3000  |
| 60 | A | 1498.3519 | 1.4263 | 21.7823  | 11.5774  |
| 61 | A | 1498.8075 | 1.3749 | 9.1941   | 10.6127  |
| 62 | A | 1508.3424 | 1.4385 | 1.0034   | 2.1600   |
| 63 | A | 1509.4267 | 1.4574 | 6.6951   | 0.9989   |
| 64 | A | 1526.5479 | 1.5843 | 13.7201  | 7.3069   |
| 65 | A | 1544.1128 | 2.7330 | 117.3119 | 3.4312   |
| 66 | A | 1587.6451 | 9.9880 | 41.3972  | 1.5609   |
| 67 | A | 1637.4173 | 8.1225 | 304.1525 | 46.1447  |
| 68 | A | 2980.4674 | 5.5111 | 55.0841  | 88.0698  |
| 69 | A | 2986.3081 | 5.5504 | 108.3523 | 351.1578 |
| 70 | A | 3021.7035 | 5.5679 | 33.9282  | 213.1408 |
| 71 | A | 3037.3446 | 5.7585 | 9.0823   | 76.3059  |
| 72 | A | 3064.1686 | 6.1027 | 0.0200   | 97.9658  |
| 73 | A | 3080.7859 | 6.0485 | 6.7295   | 55.3861  |
| 74 | A | 3081.9279 | 6.0614 | 32.7699  | 44.7513  |
| 75 | A | 3087.4744 | 6.0100 | 10.1518  | 147.8287 |
| 76 | A | 3089.6111 | 6.2074 | 39.6107  | 14.1703  |
| 77 | A | 3091.3437 | 6.1159 | 34.9074  | 115.9407 |
| 78 | A | 3122.9466 | 6.3294 | 3.4242   | 2.7984   |
| 79 | A | 3132.0162 | 6.3504 | 25.7305  | 100.0629 |
| 80 | A | 3140.1422 | 6.3203 | 38.0518  | 118.5846 |
| 81 | A | 3143.2297 | 6.3533 | 11.9910  | 151.0153 |
| 82 | A | 3151.4398 | 6.4997 | 6.2300   | 40.0819  |
| 83 | A | 3215.3326 | 6.6478 | 4.8419   | 107.4618 |
| 84 | A | 3215.4109 | 6.6445 | 9.5851   | 37.6261  |

-----  
pyNR2-nC3H7I\_s\_2\_dimpy

| NM# | Symm | Wavenumber | Force Const | IR Intens | Raman Activ |
|-----|------|------------|-------------|-----------|-------------|
| 1   | A    | 3.6827     | 0.0000      | 0.2338    | 2.0748      |
| 2   | A    | 13.1893    | 0.0003      | 1.1510    | 0.2855      |
| 3   | A    | 14.1496    | 0.0005      | 1.8251    | 0.3991      |
| 4   | A    | 48.3651    | 0.0082      | 0.2769    | 1.9805      |
| 5   | A    | 56.7176    | 0.0160      | 4.7504    | 4.8178      |
| 6   | A    | 62.8885    | 0.0065      | 0.0006    | 0.6054      |
| 7   | A    | 82.6535    | 0.0101      | 0.0118    | 1.2181      |
| 8   | A    | 84.5839    | 0.0088      | 4.7399    | 0.4947      |
| 9   | A    | 122.1961   | 0.0256      | 0.4674    | 0.7930      |
| 10  | A    | 149.7652   | 0.0228      | 0.0548    | 2.9563      |
| 11  | A    | 173.0823   | 0.0215      | 0.0761    | 0.2208      |
| 12  | A    | 203.3748   | 0.0876      | 0.4406    | 8.4307      |
| 13  | A    | 239.1836   | 0.0365      | 0.0343    | 0.0320      |
| 14  | A    | 267.6587   | 0.1013      | 0.0000    | 0.1420      |
| 15  | A    | 272.2555   | 0.1376      | 7.7570    | 2.4130      |
| 16  | A    | 278.9078   | 0.1677      | 1.3246    | 53.1198     |
| 17  | A    | 397.5008   | 0.2893      | 3.0306    | 14.9179     |
| 18  | A    | 405.5898   | 0.2686      | 0.0258    | 0.3435      |
| 19  | A    | 482.0959   | 0.4992      | 3.3089    | 2.6567      |
| 20  | A    | 539.3939   | 0.4716      | 17.8031   | 2.5309      |
| 21  | A    | 554.7117   | 0.6123      | 3.3851    | 1.5298      |
| 22  | A    | 598.2886   | 0.7664      | 2.3841    | 161.0147    |
| 23  | A    | 681.9746   | 1.8965      | 0.0237    | 3.4321      |
| 24  | A    | 731.3167   | 0.3456      | 3.6429    | 0.1016      |
| 25  | A    | 746.9871   | 1.0228      | 0.3971    | 0.2323      |
| 26  | A    | 767.5619   | 1.7257      | 11.4265   | 22.7415     |
| 27  | A    | 814.8743   | 0.7171      | 51.0324   | 0.7156      |
| 28  | A    | 828.1971   | 0.5025      | 0.0005    | 0.3353      |
| 29  | A    | 834.0917   | 0.4865      | 0.0058    | 0.8241      |
| 30  | A    | 900.0161   | 0.9303      | 5.7993    | 0.5727      |
| 31  | A    | 960.7051   | 0.7172      | 0.5236    | 0.8964      |
| 32  | A    | 970.0588   | 1.6122      | 18.5958   | 27.1053     |
| 33  | A    | 989.4264   | 0.8189      | 0.0051    | 0.2401      |
| 34  | A    | 1012.3235  | 4.2150      | 76.9557   | 24.0470     |
| 35  | A    | 1025.4872  | 0.6851      | 1.5233    | 1.0491      |



|    |   |           |        |          |          |
|----|---|-----------|--------|----------|----------|
| 36 | A | 1031.1728 | 1.7632 | 0.1885   | 36.0324  |
| 37 | A | 1079.9712 | 1.0413 | 21.9934  | 0.2113   |
| 38 | A | 1095.1398 | 1.4245 | 6.4377   | 22.9571  |
| 39 | A | 1104.8029 | 1.4313 | 3.0109   | 10.7322  |
| 40 | A | 1132.7252 | 1.1339 | 0.5480   | 0.8706   |
| 41 | A | 1133.8402 | 0.9971 | 1.0614   | 1.6375   |
| 42 | A | 1143.2274 | 1.0404 | 22.1057  | 3.4390   |
| 43 | A | 1201.1750 | 1.4674 | 7.3914   | 10.2100  |
| 44 | A | 1212.6507 | 1.0913 | 92.8159  | 49.0575  |
| 45 | A | 1237.5274 | 1.3110 | 0.3005   | 0.5123   |
| 46 | A | 1254.5463 | 1.1611 | 62.2936  | 20.1995  |
| 47 | A | 1256.8648 | 3.1342 | 35.7334  | 0.0122   |
| 48 | A | 1322.7783 | 1.1395 | 0.2696   | 7.1055   |
| 49 | A | 1323.7650 | 5.7513 | 0.8353   | 10.5633  |
| 50 | A | 1358.4114 | 1.5139 | 1.0405   | 30.5106  |
| 51 | A | 1376.3750 | 1.5764 | 11.2062  | 0.0832   |
| 52 | A | 1396.4623 | 3.4123 | 155.9434 | 33.0917  |
| 53 | A | 1409.5305 | 1.4341 | 2.5359   | 1.0527   |
| 54 | A | 1447.7631 | 1.5323 | 0.5012   | 11.0504  |
| 55 | A | 1463.4001 | 2.5303 | 1.5273   | 0.5273   |
| 56 | A | 1479.2865 | 1.4224 | 1.5317   | 12.4232  |
| 57 | A | 1485.3916 | 1.5911 | 22.0657  | 5.8401   |
| 58 | A | 1487.8588 | 1.3579 | 2.1811   | 7.1252   |
| 59 | A | 1493.6854 | 1.3822 | 1.9619   | 13.5514  |
| 60 | A | 1495.8546 | 1.3924 | 18.2753  | 19.6989  |
| 61 | A | 1498.4663 | 1.3749 | 8.5689   | 10.9721  |
| 62 | A | 1508.7462 | 1.4533 | 7.2612   | 1.1975   |
| 63 | A | 1514.4094 | 1.4652 | 4.0188   | 1.4514   |
| 64 | A | 1528.5321 | 1.6101 | 15.8642  | 16.0213  |
| 65 | A | 1550.3673 | 2.8789 | 144.8122 | 2.3232   |
| 66 | A | 1584.3625 | 9.8934 | 37.8778  | 2.3666   |
| 67 | A | 1642.2352 | 8.1117 | 415.4348 | 72.0874  |
| 68 | A | 2983.8728 | 5.5039 | 71.7454  | 76.1002  |
| 69 | A | 2990.2701 | 5.5496 | 78.2202  | 320.0526 |
| 70 | A | 3017.8885 | 5.5528 | 42.3956  | 230.2995 |
| 71 | A | 3033.1648 | 5.7435 | 7.9110   | 90.3466  |
| 72 | A | 3056.3206 | 5.9901 | 12.3528  | 112.5855 |
| 73 | A | 3057.3519 | 6.0044 | 48.4828  | 76.1916  |
| 74 | A | 3058.7169 | 6.0787 | 0.0160   | 107.0929 |
| 75 | A | 3077.8702 | 5.9149 | 18.8491  | 146.6596 |
| 76 | A | 3084.7248 | 6.1868 | 42.4529  | 14.3344  |
| 77 | A | 3085.0852 | 6.1514 | 43.5508  | 150.6648 |
| 78 | A | 3121.0128 | 6.3025 | 2.5318   | 1.4226   |
| 79 | A | 3132.7908 | 6.3343 | 36.8318  | 188.5227 |
| 80 | A | 3138.5243 | 6.4431 | 11.4406  | 52.9248  |
| 81 | A | 3145.3213 | 6.3422 | 24.7055  | 59.3646  |
| 82 | A | 3148.1813 | 6.3745 | 1.4207   | 74.9019  |
| 83 | A | 3213.1419 | 6.6411 | 8.2360   | 156.6066 |
| 84 | A | 3213.1998 | 6.6346 | 12.2858  | 31.4510  |

---

### C. Experimental Spectra and Images

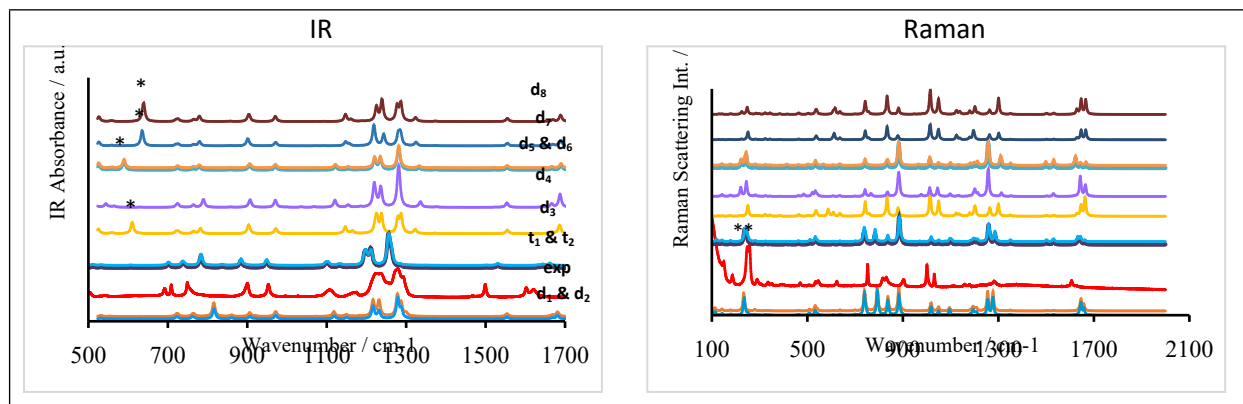

**Figure S1.** IR (left panel) and Raman spectra (right panel) of the mixture of ANL and iso-C<sub>3</sub>F<sub>7</sub>I at molar fraction of 1:1 along with the calculated ones for dimers and trimers.

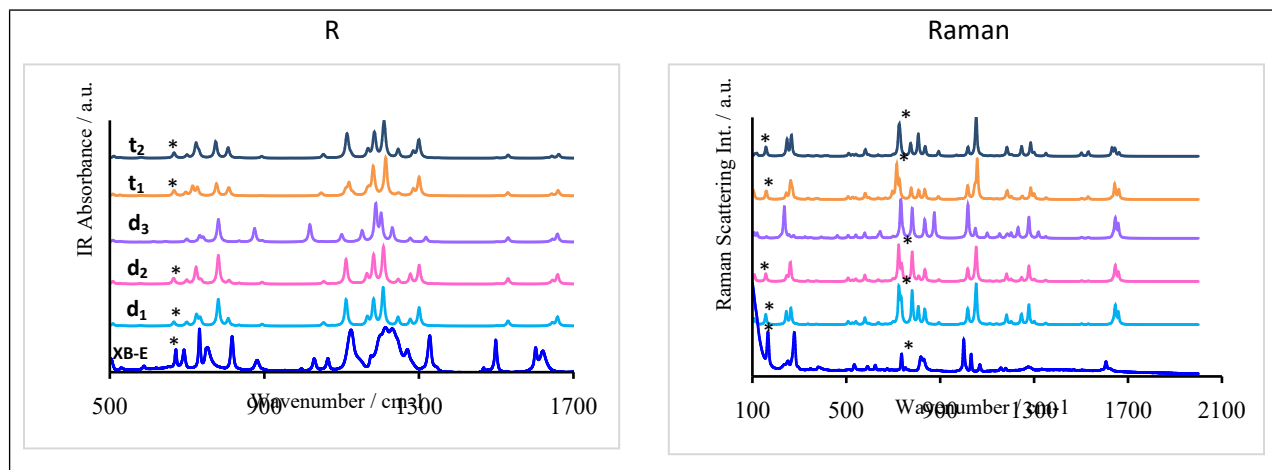

**Figure S2.** FT-IR (left panel) and Raman spectra (right panel) of mixtures of ANL and n-C<sub>3</sub>F<sub>7</sub>I at molar fraction of 1:1, along with the calculated Raman spectra of dimers and trimers.

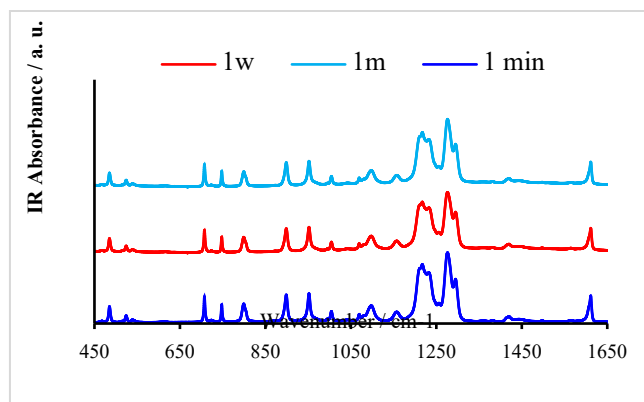

(a)

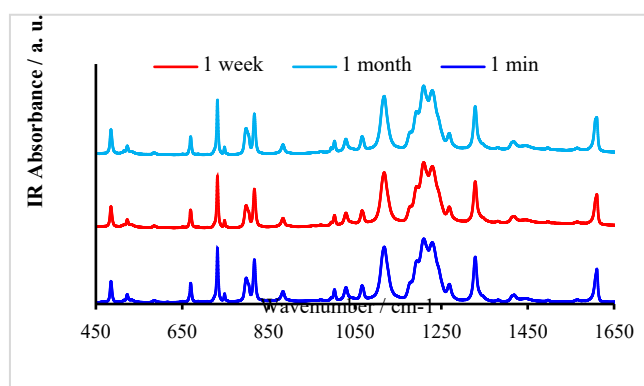

(b)

**Figure S3.** FT-IR spectra for [MePy · iso-C3F7I] (a) and [MePy · n-C3F7I] (b) after 1 minute (dark blue), 1 week (red) and 1 month (light blue) after mixing

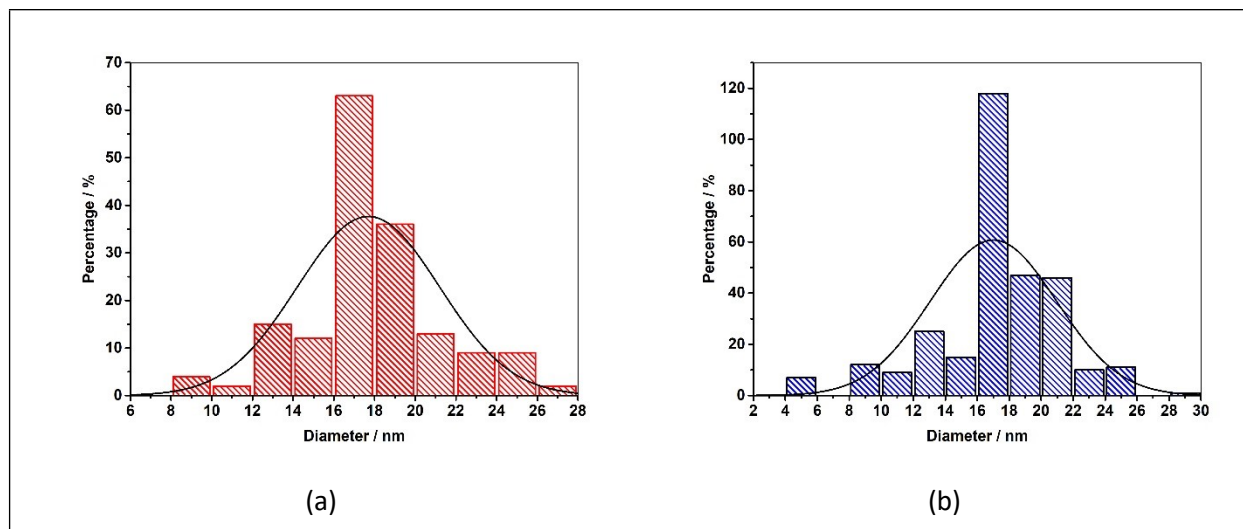

**Figure S4.** The size distribution (TEM histograms and Gaussian fit) for [MePy · iso-C<sub>3</sub>F<sub>7</sub>I] (a) and [MePy · n-C<sub>3</sub>F<sub>7</sub>I] at 72 h after mixing.

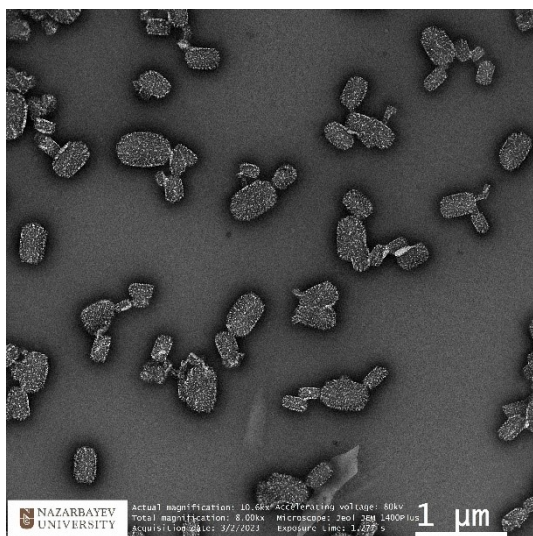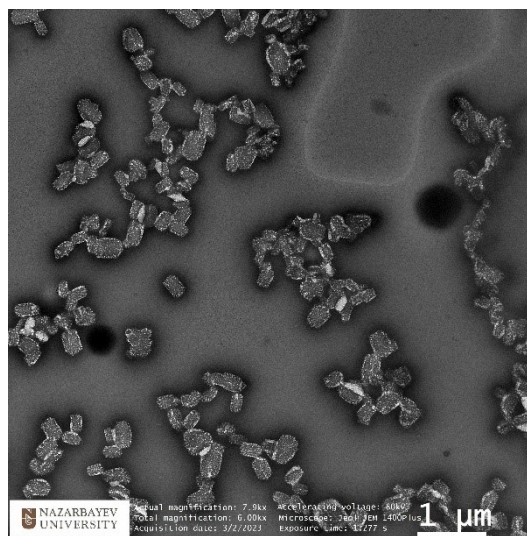

Figure S5: TEM images for [MePy · iso-C<sub>3</sub>F<sub>7</sub>I] 6 weeks after mixing.
